# Supplementary material for: Sedimentary and mineral dust sources of dissolved iron to the world ocean
Source: Copernicus journal article supplement (doi:10.5194/bg-5-631-2008), 2008-05-05
Supplement: Supplementary file 1 [file supplement.xls]

## Sheet: Dissolved Iron
Database of dissolved iron observations with filter sizes ranging from 0.2 - 0.45 um, supplement to Moore and Braucher (submitted 2007).
The database is an expansion of that compiled by Parekh et al. (2005, which build upon earlier compilations by Johnson et al., 1997; de Baar and de Jong, 2001;and Gregg et al., 2003).
We corrected some typos in the original database and expanded the total number of observations by ~30% drawing on recent publications.
The data is sorted by the 1st author's last name.
Comments, corrections and updates should be sent to jkmoore@uci.edu
month	day	year	long	lat	depth	fe(nmol/kg)	fe (nM)			Reference
1		2001	-45.3	30	0		0.7			Bergquist and Boyle 2006. Dissolved Iron in the Tropical and Subtropical Atlantic Ocean. GBC, 20, GB1015, doi:10.1029/2005GB002505, 2006.
1		2001	-45.3	30	41		0.59			Bergquist and Boyle 2006. Dissolved Iron in the Tropical and Subtropical Atlantic Ocean. GBC, 20, GB1015, doi:10.1029/2005GB002505, 2006.
1		2001	-45.3	30	63		0.4			Bergquist and Boyle 2006. Dissolved Iron in the Tropical and Subtropical Atlantic Ocean. GBC, 20, GB1015, doi:10.1029/2005GB002505, 2006.
1		2001	-45.3	30	77		0.38			Bergquist and Boyle 2006. Dissolved Iron in the Tropical and Subtropical Atlantic Ocean. GBC, 20, GB1015, doi:10.1029/2005GB002505, 2006.
1		2001	-45.3	30	165		0.42			Bergquist and Boyle 2006. Dissolved Iron in the Tropical and Subtropical Atlantic Ocean. GBC, 20, GB1015, doi:10.1029/2005GB002505, 2006.
1		2001	-45.3	30	250		0.43			Bergquist and Boyle 2006. Dissolved Iron in the Tropical and Subtropical Atlantic Ocean. GBC, 20, GB1015, doi:10.1029/2005GB002505, 2006.
1		2001	-45.3	30	450		0.42			Bergquist and Boyle 2006. Dissolved Iron in the Tropical and Subtropical Atlantic Ocean. GBC, 20, GB1015, doi:10.1029/2005GB002505, 2006.
1		2001	-45.3	30	850		0.57			Bergquist and Boyle 2006. Dissolved Iron in the Tropical and Subtropical Atlantic Ocean. GBC, 20, GB1015, doi:10.1029/2005GB002505, 2006.
1		2001	-45.3	30	950		0.59			Bergquist and Boyle 2006. Dissolved Iron in the Tropical and Subtropical Atlantic Ocean. GBC, 20, GB1015, doi:10.1029/2005GB002505, 2006.
1		2001	-45.3	30	1050		0.53			Bergquist and Boyle 2006. Dissolved Iron in the Tropical and Subtropical Atlantic Ocean. GBC, 20, GB1015, doi:10.1029/2005GB002505, 2006.
1		2001	-45.3	10.2	0		0.56			Bergquist and Boyle 2006. Dissolved Iron in the Tropical and Subtropical Atlantic Ocean. GBC, 20, GB1015, doi:10.1029/2005GB002505, 2006.
1		2001	-45.3	10.2	30		0.7			Bergquist and Boyle 2006. Dissolved Iron in the Tropical and Subtropical Atlantic Ocean. GBC, 20, GB1015, doi:10.1029/2005GB002505, 2006.
1		2001	-45	10.2	130		1.12			Bergquist and Boyle 2006. Dissolved Iron in the Tropical and Subtropical Atlantic Ocean. GBC, 20, GB1015, doi:10.1029/2005GB002505, 2006.
1		2001	-45	10.2	165		1.01			Bergquist and Boyle 2006. Dissolved Iron in the Tropical and Subtropical Atlantic Ocean. GBC, 20, GB1015, doi:10.1029/2005GB002505, 2006.
1		2001	-45	10.2	200		1.23			Bergquist and Boyle 2006. Dissolved Iron in the Tropical and Subtropical Atlantic Ocean. GBC, 20, GB1015, doi:10.1029/2005GB002505, 2006.
1		2001	-45	10.2	250		1.09			Bergquist and Boyle 2006. Dissolved Iron in the Tropical and Subtropical Atlantic Ocean. GBC, 20, GB1015, doi:10.1029/2005GB002505, 2006.
1		2001	-45	10.2	375		1.23			Bergquist and Boyle 2006. Dissolved Iron in the Tropical and Subtropical Atlantic Ocean. GBC, 20, GB1015, doi:10.1029/2005GB002505, 2006.
1		2001	-45	10.2	525		1.11			Bergquist and Boyle 2006. Dissolved Iron in the Tropical and Subtropical Atlantic Ocean. GBC, 20, GB1015, doi:10.1029/2005GB002505, 2006.
1		2001	-45	10.2	725		1.06			Bergquist and Boyle 2006. Dissolved Iron in the Tropical and Subtropical Atlantic Ocean. GBC, 20, GB1015, doi:10.1029/2005GB002505, 2006.
1		2001	-45	10.2	850		1.16			Bergquist and Boyle 2006. Dissolved Iron in the Tropical and Subtropical Atlantic Ocean. GBC, 20, GB1015, doi:10.1029/2005GB002505, 2006.
1		2001	-45	10.2	1050		1.01			Bergquist and Boyle 2006. Dissolved Iron in the Tropical and Subtropical Atlantic Ocean. GBC, 20, GB1015, doi:10.1029/2005GB002505, 2006.
1		2001	-45	10.2	1250		0.98			Bergquist and Boyle 2006. Dissolved Iron in the Tropical and Subtropical Atlantic Ocean. GBC, 20, GB1015, doi:10.1029/2005GB002505, 2006.
1		2001	-45	10.2	1500		0.77			Bergquist and Boyle 2006. Dissolved Iron in the Tropical and Subtropical Atlantic Ocean. GBC, 20, GB1015, doi:10.1029/2005GB002505, 2006.
1		2001	-45	10.2	1750		0.7			Bergquist and Boyle 2006. Dissolved Iron in the Tropical and Subtropical Atlantic Ocean. GBC, 20, GB1015, doi:10.1029/2005GB002505, 2006.
1		2001	-45	10.2	3400		0.86			Bergquist and Boyle 2006. Dissolved Iron in the Tropical and Subtropical Atlantic Ocean. GBC, 20, GB1015, doi:10.1029/2005GB002505, 2006.
1		2001	-45	10.2	4200		0.63			Bergquist and Boyle 2006. Dissolved Iron in the Tropical and Subtropical Atlantic Ocean. GBC, 20, GB1015, doi:10.1029/2005GB002505, 2006.
7		2001	-45	30	0		0.53			Bergquist and Boyle 2006. Dissolved Iron in the Tropical and Subtropical Atlantic Ocean. GBC, 20, GB1015, doi:10.1029/2005GB002505, 2006.
7		2001	-45	30	2		0.51			Bergquist and Boyle 2006. Dissolved Iron in the Tropical and Subtropical Atlantic Ocean. GBC, 20, GB1015, doi:10.1029/2005GB002505, 2006.
7		2001	-45	30	2		0.53			Bergquist and Boyle 2006. Dissolved Iron in the Tropical and Subtropical Atlantic Ocean. GBC, 20, GB1015, doi:10.1029/2005GB002505, 2006.
7		2001	-45	30	4		0.56			Bergquist and Boyle 2006. Dissolved Iron in the Tropical and Subtropical Atlantic Ocean. GBC, 20, GB1015, doi:10.1029/2005GB002505, 2006.
7		2001	-45	30	6		0.58			Bergquist and Boyle 2006. Dissolved Iron in the Tropical and Subtropical Atlantic Ocean. GBC, 20, GB1015, doi:10.1029/2005GB002505, 2006.
7		2001	-45	30	8		0.49			Bergquist and Boyle 2006. Dissolved Iron in the Tropical and Subtropical Atlantic Ocean. GBC, 20, GB1015, doi:10.1029/2005GB002505, 2006.
7		2001	-45	30	8		0.46			Bergquist and Boyle 2006. Dissolved Iron in the Tropical and Subtropical Atlantic Ocean. GBC, 20, GB1015, doi:10.1029/2005GB002505, 2006.
7		2001	-45	30	11		0.46			Bergquist and Boyle 2006. Dissolved Iron in the Tropical and Subtropical Atlantic Ocean. GBC, 20, GB1015, doi:10.1029/2005GB002505, 2006.
7		2001	-45	30	14		0.48			Bergquist and Boyle 2006. Dissolved Iron in the Tropical and Subtropical Atlantic Ocean. GBC, 20, GB1015, doi:10.1029/2005GB002505, 2006.
7		2001	-45	30	17		0.51			Bergquist and Boyle 2006. Dissolved Iron in the Tropical and Subtropical Atlantic Ocean. GBC, 20, GB1015, doi:10.1029/2005GB002505, 2006.
7		2001	-45	30	19		0.47			Bergquist and Boyle 2006. Dissolved Iron in the Tropical and Subtropical Atlantic Ocean. GBC, 20, GB1015, doi:10.1029/2005GB002505, 2006.
7		2001	-45	30	30		0.43			Bergquist and Boyle 2006. Dissolved Iron in the Tropical and Subtropical Atlantic Ocean. GBC, 20, GB1015, doi:10.1029/2005GB002505, 2006.
7		2001	-45	30	39		0.43			Bergquist and Boyle 2006. Dissolved Iron in the Tropical and Subtropical Atlantic Ocean. GBC, 20, GB1015, doi:10.1029/2005GB002505, 2006.
7		2001	-45	30	79		0.37			Bergquist and Boyle 2006. Dissolved Iron in the Tropical and Subtropical Atlantic Ocean. GBC, 20, GB1015, doi:10.1029/2005GB002505, 2006.
7		2001	-45	30	79		0.38			Bergquist and Boyle 2006. Dissolved Iron in the Tropical and Subtropical Atlantic Ocean. GBC, 20, GB1015, doi:10.1029/2005GB002505, 2006.
7		2001	-45	30	197		0.45			Bergquist and Boyle 2006. Dissolved Iron in the Tropical and Subtropical Atlantic Ocean. GBC, 20, GB1015, doi:10.1029/2005GB002505, 2006.
7		2001	-45	30	197		0.43			Bergquist and Boyle 2006. Dissolved Iron in the Tropical and Subtropical Atlantic Ocean. GBC, 20, GB1015, doi:10.1029/2005GB002505, 2006.
7		2001	-45	30	0		0.62			Bergquist and Boyle 2006. Dissolved Iron in the Tropical and Subtropical Atlantic Ocean. GBC, 20, GB1015, doi:10.1029/2005GB002505, 2006.
7		2001	-45.5	10.1	2		0.73			Bergquist and Boyle 2006. Dissolved Iron in the Tropical and Subtropical Atlantic Ocean. GBC, 20, GB1015, doi:10.1029/2005GB002505, 2006.
7		2001	-45.5	10.1	5		0.61			Bergquist and Boyle 2006. Dissolved Iron in the Tropical and Subtropical Atlantic Ocean. GBC, 20, GB1015, doi:10.1029/2005GB002505, 2006.
7		2001	-45.5	10.1	7		0.57			Bergquist and Boyle 2006. Dissolved Iron in the Tropical and Subtropical Atlantic Ocean. GBC, 20, GB1015, doi:10.1029/2005GB002505, 2006.
7		2001	-45.5	10.1	10		0.5			Bergquist and Boyle 2006. Dissolved Iron in the Tropical and Subtropical Atlantic Ocean. GBC, 20, GB1015, doi:10.1029/2005GB002505, 2006.
7		2001	-45.5	10.1	13		0.47			Bergquist and Boyle 2006. Dissolved Iron in the Tropical and Subtropical Atlantic Ocean. GBC, 20, GB1015, doi:10.1029/2005GB002505, 2006.
7		2001	-45.5	10.1	16		0.53			Bergquist and Boyle 2006. Dissolved Iron in the Tropical and Subtropical Atlantic Ocean. GBC, 20, GB1015, doi:10.1029/2005GB002505, 2006.
7		2001	-45.5	10.1	19		0.64			Bergquist and Boyle 2006. Dissolved Iron in the Tropical and Subtropical Atlantic Ocean. GBC, 20, GB1015, doi:10.1029/2005GB002505, 2006.
7		2001	-45.5	10.1	22		0.58			Bergquist and Boyle 2006. Dissolved Iron in the Tropical and Subtropical Atlantic Ocean. GBC, 20, GB1015, doi:10.1029/2005GB002505, 2006.
7		2001	-45.5	10.1	25		0.55			Bergquist and Boyle 2006. Dissolved Iron in the Tropical and Subtropical Atlantic Ocean. GBC, 20, GB1015, doi:10.1029/2005GB002505, 2006.
7		2001	-45.5	10.1	28		0.57			Bergquist and Boyle 2006. Dissolved Iron in the Tropical and Subtropical Atlantic Ocean. GBC, 20, GB1015, doi:10.1029/2005GB002505, 2006.
7		2001	-45.5	10.1	49		0.41			Bergquist and Boyle 2006. Dissolved Iron in the Tropical and Subtropical Atlantic Ocean. GBC, 20, GB1015, doi:10.1029/2005GB002505, 2006.
7		2001	-45.5	10.1	79		0.38			Bergquist and Boyle 2006. Dissolved Iron in the Tropical and Subtropical Atlantic Ocean. GBC, 20, GB1015, doi:10.1029/2005GB002505, 2006.
7		2001	-45.5	10.1	148		0.59			Bergquist and Boyle 2006. Dissolved Iron in the Tropical and Subtropical Atlantic Ocean. GBC, 20, GB1015, doi:10.1029/2005GB002505, 2006.
7		2001	-45.5	10.1	198		0.78			Bergquist and Boyle 2006. Dissolved Iron in the Tropical and Subtropical Atlantic Ocean. GBC, 20, GB1015, doi:10.1029/2005GB002505, 2006.
3		2002	-37	-24.5	1		0.37			Bergquist and Boyle 2006. Dissolved Iron in the Tropical and Subtropical Atlantic Ocean. GBC, 20, GB1015, doi:10.1029/2005GB002505, 2006.
3		2002	-37	-24.5	18		0.4			Bergquist and Boyle 2006. Dissolved Iron in the Tropical and Subtropical Atlantic Ocean. GBC, 20, GB1015, doi:10.1029/2005GB002505, 2006.
3		2002	-37	-24.5	69		0.25			Bergquist and Boyle 2006. Dissolved Iron in the Tropical and Subtropical Atlantic Ocean. GBC, 20, GB1015, doi:10.1029/2005GB002505, 2006.
3		2002	-37	-24.5	113		0.3			Bergquist and Boyle 2006. Dissolved Iron in the Tropical and Subtropical Atlantic Ocean. GBC, 20, GB1015, doi:10.1029/2005GB002505, 2006.
3		2002	-37	-24.5	394		0.27			Bergquist and Boyle 2006. Dissolved Iron in the Tropical and Subtropical Atlantic Ocean. GBC, 20, GB1015, doi:10.1029/2005GB002505, 2006.
3		2002	-37	-24.5	544		0.29			Bergquist and Boyle 2006. Dissolved Iron in the Tropical and Subtropical Atlantic Ocean. GBC, 20, GB1015, doi:10.1029/2005GB002505, 2006.
3		2002	-37	-24.5	709		0.38			Bergquist and Boyle 2006. Dissolved Iron in the Tropical and Subtropical Atlantic Ocean. GBC, 20, GB1015, doi:10.1029/2005GB002505, 2006.
3		2002	-37	-24.5	841		0.4			Bergquist and Boyle 2006. Dissolved Iron in the Tropical and Subtropical Atlantic Ocean. GBC, 20, GB1015, doi:10.1029/2005GB002505, 2006.
3		2002	-37	-24.5	985		0.4			Bergquist and Boyle 2006. Dissolved Iron in the Tropical and Subtropical Atlantic Ocean. GBC, 20, GB1015, doi:10.1029/2005GB002505, 2006.
3		2002	-37	-24.5	1181		0.39			Bergquist and Boyle 2006. Dissolved Iron in the Tropical and Subtropical Atlantic Ocean. GBC, 20, GB1015, doi:10.1029/2005GB002505, 2006.
3		2002	-37	-24.5	1366		0.47			Bergquist and Boyle 2006. Dissolved Iron in the Tropical and Subtropical Atlantic Ocean. GBC, 20, GB1015, doi:10.1029/2005GB002505, 2006.
3		2002	-37	-24.5	1649		0.44			Bergquist and Boyle 2006. Dissolved Iron in the Tropical and Subtropical Atlantic Ocean. GBC, 20, GB1015, doi:10.1029/2005GB002505, 2006.
3		2002	-37	-24.5	1787		0.47			Bergquist and Boyle 2006. Dissolved Iron in the Tropical and Subtropical Atlantic Ocean. GBC, 20, GB1015, doi:10.1029/2005GB002505, 2006.
3		2002	-37	-24.5	1920		0.47			Bergquist and Boyle 2006. Dissolved Iron in the Tropical and Subtropical Atlantic Ocean. GBC, 20, GB1015, doi:10.1029/2005GB002505, 2006.
3		2002	-37	-24.5	2198		0.48			Bergquist and Boyle 2006. Dissolved Iron in the Tropical and Subtropical Atlantic Ocean. GBC, 20, GB1015, doi:10.1029/2005GB002505, 2006.
3		2002	-37	-24.5	2494		0.51			Bergquist and Boyle 2006. Dissolved Iron in the Tropical and Subtropical Atlantic Ocean. GBC, 20, GB1015, doi:10.1029/2005GB002505, 2006.
3		2002	-37	-24.5	2676		0.52			Bergquist and Boyle 2006. Dissolved Iron in the Tropical and Subtropical Atlantic Ocean. GBC, 20, GB1015, doi:10.1029/2005GB002505, 2006.
3		2002	-37	-24.5	3051		0.5			Bergquist and Boyle 2006. Dissolved Iron in the Tropical and Subtropical Atlantic Ocean. GBC, 20, GB1015, doi:10.1029/2005GB002505, 2006.
3		2002	-37	-24.5	3308		0.51			Bergquist and Boyle 2006. Dissolved Iron in the Tropical and Subtropical Atlantic Ocean. GBC, 20, GB1015, doi:10.1029/2005GB002505, 2006.
3		2002	-37	-24.5	3556		0.42			Bergquist and Boyle 2006. Dissolved Iron in the Tropical and Subtropical Atlantic Ocean. GBC, 20, GB1015, doi:10.1029/2005GB002505, 2006.
3		2002	-37	-24.5	3806		0.44			Bergquist and Boyle 2006. Dissolved Iron in the Tropical and Subtropical Atlantic Ocean. GBC, 20, GB1015, doi:10.1029/2005GB002505, 2006.
3		2002	-37	-24.5	3905		0.44			Bergquist and Boyle 2006. Dissolved Iron in the Tropical and Subtropical Atlantic Ocean. GBC, 20, GB1015, doi:10.1029/2005GB002505, 2006.
3		2002	-37	-24.5	4029		0.42			Bergquist and Boyle 2006. Dissolved Iron in the Tropical and Subtropical Atlantic Ocean. GBC, 20, GB1015, doi:10.1029/2005GB002505, 2006.
3		2001	-45.3	30	0		0.48			Bergquist and Boyle 2006. Dissolved Iron in the Tropical and Subtropical Atlantic Ocean. GBC, 20, GB1015, doi:10.1029/2005GB002505, 2006.
3		2001	-45	26.2	0		0.49			Bergquist and Boyle 2006. Dissolved Iron in the Tropical and Subtropical Atlantic Ocean. GBC, 20, GB1015, doi:10.1029/2005GB002505, 2006.
3		2001	-45	24	0		0.75			Bergquist and Boyle 2006. Dissolved Iron in the Tropical and Subtropical Atlantic Ocean. GBC, 20, GB1015, doi:10.1029/2005GB002505, 2006.
3		2001	-45	23	0		0.82			Bergquist and Boyle 2006. Dissolved Iron in the Tropical and Subtropical Atlantic Ocean. GBC, 20, GB1015, doi:10.1029/2005GB002505, 2006.
3		2001	-45	21.7	0		0.92			Bergquist and Boyle 2006. Dissolved Iron in the Tropical and Subtropical Atlantic Ocean. GBC, 20, GB1015, doi:10.1029/2005GB002505, 2006.
3		2001	-45	20.5	0		0.86			Bergquist and Boyle 2006. Dissolved Iron in the Tropical and Subtropical Atlantic Ocean. GBC, 20, GB1015, doi:10.1029/2005GB002505, 2006.
3		2001	-45	18.4	0		0.71			Bergquist and Boyle 2006. Dissolved Iron in the Tropical and Subtropical Atlantic Ocean. GBC, 20, GB1015, doi:10.1029/2005GB002505, 2006.
3		2001	-45	18	0		0.65			Bergquist and Boyle 2006. Dissolved Iron in the Tropical and Subtropical Atlantic Ocean. GBC, 20, GB1015, doi:10.1029/2005GB002505, 2006.
3		2001	-45	15.8	0		0.67			Bergquist and Boyle 2006. Dissolved Iron in the Tropical and Subtropical Atlantic Ocean. GBC, 20, GB1015, doi:10.1029/2005GB002505, 2006.
3		2001	-45	12.3	0		0.32			Bergquist and Boyle 2006. Dissolved Iron in the Tropical and Subtropical Atlantic Ocean. GBC, 20, GB1015, doi:10.1029/2005GB002505, 2006.
3		2001	-45	11.6	0		0.45			Bergquist and Boyle 2006. Dissolved Iron in the Tropical and Subtropical Atlantic Ocean. GBC, 20, GB1015, doi:10.1029/2005GB002505, 2006.
3		2001	-45	10.6	0		0.39			Bergquist and Boyle 2006. Dissolved Iron in the Tropical and Subtropical Atlantic Ocean. GBC, 20, GB1015, doi:10.1029/2005GB002505, 2006.
3		2001	-23.6	29.2	0		0.41			Bergquist and Boyle 2006. Dissolved Iron in the Tropical and Subtropical Atlantic Ocean. GBC, 20, GB1015, doi:10.1029/2005GB002505, 2006.
3		2001	-28	29.3	0		0.44			Bergquist and Boyle 2006. Dissolved Iron in the Tropical and Subtropical Atlantic Ocean. GBC, 20, GB1015, doi:10.1029/2005GB002505, 2006.
3		2001	-31.9	29.6	0		0.39			Bergquist and Boyle 2006. Dissolved Iron in the Tropical and Subtropical Atlantic Ocean. GBC, 20, GB1015, doi:10.1029/2005GB002505, 2006.
3		2001	-35.9	29.7	0		0.62			Bergquist and Boyle 2006. Dissolved Iron in the Tropical and Subtropical Atlantic Ocean. GBC, 20, GB1015, doi:10.1029/2005GB002505, 2006.
3		2001	-39.4	29.8	0		0.51			Bergquist and Boyle 2006. Dissolved Iron in the Tropical and Subtropical Atlantic Ocean. GBC, 20, GB1015, doi:10.1029/2005GB002505, 2006.
3		2001	-45	30	0		0.43			Bergquist and Boyle 2006. Dissolved Iron in the Tropical and Subtropical Atlantic Ocean. GBC, 20, GB1015, doi:10.1029/2005GB002505, 2006.
3		2002	-56.4	11.4	0		0.57			Bergquist and Boyle 2006. Dissolved Iron in the Tropical and Subtropical Atlantic Ocean. GBC, 20, GB1015, doi:10.1029/2005GB002505, 2006.
3		2002	-54.5	10.5	0		0.73			Bergquist and Boyle 2006. Dissolved Iron in the Tropical and Subtropical Atlantic Ocean. GBC, 20, GB1015, doi:10.1029/2005GB002505, 2006.
3		2002	-49.5	7	0		0.51			Bergquist and Boyle 2006. Dissolved Iron in the Tropical and Subtropical Atlantic Ocean. GBC, 20, GB1015, doi:10.1029/2005GB002505, 2006.
3		2002	-48.4	6.2	0		0.55			Bergquist and Boyle 2006. Dissolved Iron in the Tropical and Subtropical Atlantic Ocean. GBC, 20, GB1015, doi:10.1029/2005GB002505, 2006.
3		2002	-45.6	4.3	0		0.52			Bergquist and Boyle 2006. Dissolved Iron in the Tropical and Subtropical Atlantic Ocean. GBC, 20, GB1015, doi:10.1029/2005GB002505, 2006.
3		2002	-44.5	3.3	0		0.64			Bergquist and Boyle 2006. Dissolved Iron in the Tropical and Subtropical Atlantic Ocean. GBC, 20, GB1015, doi:10.1029/2005GB002505, 2006.
3		2002	-43.8	3.1	0		0.73			Bergquist and Boyle 2006. Dissolved Iron in the Tropical and Subtropical Atlantic Ocean. GBC, 20, GB1015, doi:10.1029/2005GB002505, 2006.
3		2002	-41.5	2.1	0		0.63			Bergquist and Boyle 2006. Dissolved Iron in the Tropical and Subtropical Atlantic Ocean. GBC, 20, GB1015, doi:10.1029/2005GB002505, 2006.
3		2002	-35	-0.5	0		0.54			Bergquist and Boyle 2006. Dissolved Iron in the Tropical and Subtropical Atlantic Ocean. GBC, 20, GB1015, doi:10.1029/2005GB002505, 2006.
3		2002	-35	-0.5	0		0.53			Bergquist and Boyle 2006. Dissolved Iron in the Tropical and Subtropical Atlantic Ocean. GBC, 20, GB1015, doi:10.1029/2005GB002505, 2006.
3		2002	-31.4	-7.4	0		0.25			Bergquist and Boyle 2006. Dissolved Iron in the Tropical and Subtropical Atlantic Ocean. GBC, 20, GB1015, doi:10.1029/2005GB002505, 2006.
3		2002	-31.5	-8.5	0		0.29			Bergquist and Boyle 2006. Dissolved Iron in the Tropical and Subtropical Atlantic Ocean. GBC, 20, GB1015, doi:10.1029/2005GB002505, 2006.
3		2002	-32.2	-11.7	0		0.37			Bergquist and Boyle 2006. Dissolved Iron in the Tropical and Subtropical Atlantic Ocean. GBC, 20, GB1015, doi:10.1029/2005GB002505, 2006.
3		2002	-32.1	-11.7	0		0.26			Bergquist and Boyle 2006. Dissolved Iron in the Tropical and Subtropical Atlantic Ocean. GBC, 20, GB1015, doi:10.1029/2005GB002505, 2006.
3		2002	-32.2	-12.5	0		0.25			Bergquist and Boyle 2006. Dissolved Iron in the Tropical and Subtropical Atlantic Ocean. GBC, 20, GB1015, doi:10.1029/2005GB002505, 2006.
3		2002	-32.9	-14.9	0		0.29			Bergquist and Boyle 2006. Dissolved Iron in the Tropical and Subtropical Atlantic Ocean. GBC, 20, GB1015, doi:10.1029/2005GB002505, 2006.
3		2002	-33.3	-16.6	0		0.27			Bergquist and Boyle 2006. Dissolved Iron in the Tropical and Subtropical Atlantic Ocean. GBC, 20, GB1015, doi:10.1029/2005GB002505, 2006.
3		2002	-34	-19	0		0.25			Bergquist and Boyle 2006. Dissolved Iron in the Tropical and Subtropical Atlantic Ocean. GBC, 20, GB1015, doi:10.1029/2005GB002505, 2006.
3		2002	-34.1	-19.2	0		0.23			Bergquist and Boyle 2006. Dissolved Iron in the Tropical and Subtropical Atlantic Ocean. GBC, 20, GB1015, doi:10.1029/2005GB002505, 2006.
3		2002	-35.5	-21.9	0		0.35			Bergquist and Boyle 2006. Dissolved Iron in the Tropical and Subtropical Atlantic Ocean. GBC, 20, GB1015, doi:10.1029/2005GB002505, 2006.
3		2002	-36.4	-23.5	0		0.39			Bergquist and Boyle 2006. Dissolved Iron in the Tropical and Subtropical Atlantic Ocean. GBC, 20, GB1015, doi:10.1029/2005GB002505, 2006.
3		2002	-36.7	-24.1	0		0.36			Bergquist and Boyle 2006. Dissolved Iron in the Tropical and Subtropical Atlantic Ocean. GBC, 20, GB1015, doi:10.1029/2005GB002505, 2006.
10	2004-04-10	1995	69.83	-49.12	30		12.58	KERGISL		Blain, S., P. Treguer, S. Belviso, E. Bucciarelli, M. Denis, S. Desbre, M. Fiala, V.M. Jezequel, J. LeFevre, P. Mayzaud, J. Marty, S. Razouls, 2001, A biogeochemical study of the island mass effect in the context of the iron hypothesis: Kerguelen Islands, Southern Ocean, Deep-Sea Res. I, 48, 163-187
10	2004-04-10	1995	72.67	-47.73	40		0.46	KERGISL		Blain, S., P. Treguer, S. Belviso, E. Bucciarelli, M. Denis, S. Desbre, M. Fiala, V.M. Jezequel, J. LeFevre, P. Mayzaud, J. Marty, S. Razouls, 2001, A biogeochemical study of the island mass effect in the context of the iron hypothesis: Kerguelen Islands, Southern Ocean, Deep-Sea Res. I, 48, 163-187
10	2004-04-10	1995	71.8	-48.5	40		0.52	KERGISL		Blain, S., P. Treguer, S. Belviso, E. Bucciarelli, M. Denis, S. Desbre, M. Fiala, V.M. Jezequel, J. LeFevre, P. Mayzaud, J. Marty, S. Razouls, 2001, A biogeochemical study of the island mass effect in the context of the iron hypothesis: Kerguelen Islands, Southern Ocean, Deep-Sea Res. I, 48, 163-187
10	2004-04-10	1995	71.8	-47.8	40		0.99	KERGISL		Blain, S., P. Treguer, S. Belviso, E. Bucciarelli, M. Denis, S. Desbre, M. Fiala, V.M. Jezequel, J. LeFevre, P. Mayzaud, J. Marty, S. Razouls, 2001, A biogeochemical study of the island mass effect in the context of the iron hypothesis: Kerguelen Islands, Southern Ocean, Deep-Sea Res. I, 48, 163-187
10	2004-04-10	1995	69.98	-48.3	40		6.39	KERGISL		Blain, S., P. Treguer, S. Belviso, E. Bucciarelli, M. Denis, S. Desbre, M. Fiala, V.M. Jezequel, J. LeFevre, P. Mayzaud, J. Marty, S. Razouls, 2001, A biogeochemical study of the island mass effect in the context of the iron hypothesis: Kerguelen Islands, Southern Ocean, Deep-Sea Res. I, 48, 163-187
10	2004-04-10	1995	71.02	-48	40		5.3	KERGISL		Blain, S., P. Treguer, S. Belviso, E. Bucciarelli, M. Denis, S. Desbre, M. Fiala, V.M. Jezequel, J. LeFevre, P. Mayzaud, J. Marty, S. Razouls, 2001, A biogeochemical study of the island mass effect in the context of the iron hypothesis: Kerguelen Islands, Southern Ocean, Deep-Sea Res. I, 48, 163-187
10	2004-04-10	1995	71.17	-48.7	40		2.71	KERGISL		Blain, S., P. Treguer, S. Belviso, E. Bucciarelli, M. Denis, S. Desbre, M. Fiala, V.M. Jezequel, J. LeFevre, P. Mayzaud, J. Marty, S. Razouls, 2001, A biogeochemical study of the island mass effect in the context of the iron hypothesis: Kerguelen Islands, Southern Ocean, Deep-Sea Res. I, 48, 163-187
10	2004-04-10	1995	71.8	-49.13	40		0.58	KERGISL		Blain, S., P. Treguer, S. Belviso, E. Bucciarelli, M. Denis, S. Desbre, M. Fiala, V.M. Jezequel, J. LeFevre, P. Mayzaud, J. Marty, S. Razouls, 2001, A biogeochemical study of the island mass effect in the context of the iron hypothesis: Kerguelen Islands, Southern Ocean, Deep-Sea Res. I, 48, 163-187
10	2004-04-10	1995	72.67	-48.47	40		0.71	KERGISL		Blain, S., P. Treguer, S. Belviso, E. Bucciarelli, M. Denis, S. Desbre, M. Fiala, V.M. Jezequel, J. LeFevre, P. Mayzaud, J. Marty, S. Razouls, 2001, A biogeochemical study of the island mass effect in the context of the iron hypothesis: Kerguelen Islands, Southern Ocean, Deep-Sea Res. I, 48, 163-187
10	2004-04-10	1995	73.58	-48	40		4.11	KERGISL		Blain, S., P. Treguer, S. Belviso, E. Bucciarelli, M. Denis, S. Desbre, M. Fiala, V.M. Jezequel, J. LeFevre, P. Mayzaud, J. Marty, S. Razouls, 2001, A biogeochemical study of the island mass effect in the context of the iron hypothesis: Kerguelen Islands, Southern Ocean, Deep-Sea Res. I, 48, 163-187
10	2004-04-10	1995	71.02	-49.33	40		7.65	KERGISL		Blain, S., P. Treguer, S. Belviso, E. Bucciarelli, M. Denis, S. Desbre, M. Fiala, V.M. Jezequel, J. LeFevre, P. Mayzaud, J. Marty, S. Razouls, 2001, A biogeochemical study of the island mass effect in the context of the iron hypothesis: Kerguelen Islands, Southern Ocean, Deep-Sea Res. I, 48, 163-187
10	2004-04-10	1995	70.5	-48.9	50		8.8	KERGISL		Blain, S., P. Treguer, S. Belviso, E. Bucciarelli, M. Denis, S. Desbre, M. Fiala, V.M. Jezequel, J. LeFevre, P. Mayzaud, J. Marty, S. Razouls, 2001, A biogeochemical study of the island mass effect in the context of the iron hypothesis: Kerguelen Islands, Southern Ocean, Deep-Sea Res. I, 48, 163-187
9	1	2000	-11.13	0.83	1	0	0.21	EqAtl		Bowie, A.R., D.J. Whitworth, E.P. Achterberg, R. Fauzi, C. Mantoura, and P.J. Worsfold, 2002. Biogeochemistry of Fe and other trace elements (Al, Co, Ni) in the upper Atlantic Ocean. Deep-Sea Res. I 49: 605-636.
9	1	2000	-2.52	-9.92	1	0	0.18	EqAtl		Bowie, A.R., D.J. Whitworth, E.P. Achterberg, R. Fauzi, C. Mantoura, and P.J. Worsfold, 2002. Biogeochemistry of Fe and other trace elements (Al, Co, Ni) in the upper Atlantic Ocean. Deep-Sea Res. I 49: 605-636.
9	1	2000	-18.16	9.58	1	0	0.55	EqAtl		Bowie, A.R., D.J. Whitworth, E.P. Achterberg, R. Fauzi, C. Mantoura, and P.J. Worsfold, 2002. Biogeochemistry of Fe and other trace elements (Al, Co, Ni) in the upper Atlantic Ocean. Deep-Sea Res. I 49: 605-636.
9	1	2000	-6	-5.58	1	0	0.16	EqAtl		Bowie, A.R., D.J. Whitworth, E.P. Achterberg, R. Fauzi, C. Mantoura, and P.J. Worsfold, 2002. Biogeochemistry of Fe and other trace elements (Al, Co, Ni) in the upper Atlantic Ocean. Deep-Sea Res. I 49: 605-636.
2	8	1999	140	-61	0		0.08	Southern Ocean		Bowie, A.R., M.T. Maldonado, R.D. Frew, P.L. Croot, E.P. Achterberg, R. Fauzi, C. Mantoura, P.J. Worsfold, C.S. Law, P.W. Boyd, 2001, The fate of added iron during a mesoscale fertilisation experiment in the Southern Ocean, Deep-Sea Res. II, 48, 2703-2743
1	16	1999	140	-61	10	0	0.05	SOIREE		Boyd, P.W. and 34 others, 2000. A mesoscale phytoplankton bloom in the polar Southern Ocean stimulated by iron fertilization. Nature 407: 695-702.		Dates and depths approximate (MLD)
1	17	1999	140	-61	10	0	0.11	SOIREE		Boyd, P.W. and 34 others, 2000. A mesoscale phytoplankton bloom in the polar Southern Ocean stimulated by iron fertilization. Nature 407: 695-702.		Dates and depths approximate (MLD)
1	15	1999	140	-61	10	0	0.08	SOIREE		Boyd, P.W. and 34 others, 2000. A mesoscale phytoplankton bloom in the polar Southern Ocean stimulated by iron fertilization. Nature 407: 695-702.		Dates and depths approximate (MLD)
3		1998	-10.62	45.38	10		1.45	NE Atlantic		Boye et al., 2006. The Chemical speciation of iron in the north-east Atlantic Ocean. Deep-Sea Res. I, 53: 667-683.
3		1998	-10.62	45.38	25		1.08	NE Atlantic		Boye et al., 2006. The Chemical speciation of iron in the north-east Atlantic Ocean. Deep-Sea Res. I, 53: 667-683.
3		1998	-10.62	45.38	50		0.88	NE Atlantic		Boye et al., 2006. The Chemical speciation of iron in the north-east Atlantic Ocean. Deep-Sea Res. I, 53: 667-683.
3		1998	-10.62	45.38	75		0.86	NE Atlantic		Boye et al., 2006. The Chemical speciation of iron in the north-east Atlantic Ocean. Deep-Sea Res. I, 53: 667-683.
3		1998	-10.62	45.38	125		0.8	NE Atlantic		Boye et al., 2006. The Chemical speciation of iron in the north-east Atlantic Ocean. Deep-Sea Res. I, 53: 667-683.
3		1998	-10.62	45.38	150		0.78	NE Atlantic		Boye et al., 2006. The Chemical speciation of iron in the north-east Atlantic Ocean. Deep-Sea Res. I, 53: 667-683.
3		1998	-10.62	45.38	200		0.78	NE Atlantic		Boye et al., 2006. The Chemical speciation of iron in the north-east Atlantic Ocean. Deep-Sea Res. I, 53: 667-683.
3		1998	-17.78	40.5	10		0.8	NE Atlantic		Boye et al., 2006. The Chemical speciation of iron in the north-east Atlantic Ocean. Deep-Sea Res. I, 53: 667-683.
3		1998	-17.78	40.5	25		0.77	NE Atlantic		Boye et al., 2006. The Chemical speciation of iron in the north-east Atlantic Ocean. Deep-Sea Res. I, 53: 667-683.
3		1998	-17.78	40.5	50		1.37	NE Atlantic		Boye et al., 2006. The Chemical speciation of iron in the north-east Atlantic Ocean. Deep-Sea Res. I, 53: 667-683.
3		1998	-17.78	40.5	75		1.23	NE Atlantic		Boye et al., 2006. The Chemical speciation of iron in the north-east Atlantic Ocean. Deep-Sea Res. I, 53: 667-683.
3		1998	-17.78	40.5	125		1.51	NE Atlantic		Boye et al., 2006. The Chemical speciation of iron in the north-east Atlantic Ocean. Deep-Sea Res. I, 53: 667-683.
3		1998	-17.78	40.5	150		1.47	NE Atlantic		Boye et al., 2006. The Chemical speciation of iron in the north-east Atlantic Ocean. Deep-Sea Res. I, 53: 667-683.
3		1998	-17.78	40.5	200		1.59	NE Atlantic		Boye et al., 2006. The Chemical speciation of iron in the north-east Atlantic Ocean. Deep-Sea Res. I, 53: 667-683.
3		1998	-22.97	37.47	10		0.61	NE Atlantic		Boye et al., 2006. The Chemical speciation of iron in the north-east Atlantic Ocean. Deep-Sea Res. I, 53: 667-683.
3		1998	-22.97	37.47	30		0.56	NE Atlantic		Boye et al., 2006. The Chemical speciation of iron in the north-east Atlantic Ocean. Deep-Sea Res. I, 53: 667-683.
3		1998	-22.97	37.47	50		0.73	NE Atlantic		Boye et al., 2006. The Chemical speciation of iron in the north-east Atlantic Ocean. Deep-Sea Res. I, 53: 667-683.
3		1998	-22.97	37.47	75		0.79	NE Atlantic		Boye et al., 2006. The Chemical speciation of iron in the north-east Atlantic Ocean. Deep-Sea Res. I, 53: 667-683.
3		1998	-22.97	37.47	100		0.84	NE Atlantic		Boye et al., 2006. The Chemical speciation of iron in the north-east Atlantic Ocean. Deep-Sea Res. I, 53: 667-683.
3		1998	-22.97	37.47	250		1.19	NE Atlantic		Boye et al., 2006. The Chemical speciation of iron in the north-east Atlantic Ocean. Deep-Sea Res. I, 53: 667-683.
3		1998	-22.97	37.47	1000		1.57	NE Atlantic		Boye et al., 2006. The Chemical speciation of iron in the north-east Atlantic Ocean. Deep-Sea Res. I, 53: 667-683.
3		1998	-22.97	37.47	1500		1.37	NE Atlantic		Boye et al., 2006. The Chemical speciation of iron in the north-east Atlantic Ocean. Deep-Sea Res. I, 53: 667-683.
3		1998	-22.97	37.47	2000		1.38	NE Atlantic		Boye et al., 2006. The Chemical speciation of iron in the north-east Atlantic Ocean. Deep-Sea Res. I, 53: 667-683.
3		1998	-23	42.58	10		0.65	NE Atlantic		Boye et al., 2006. The Chemical speciation of iron in the north-east Atlantic Ocean. Deep-Sea Res. I, 53: 667-683.
3		1998	-23	42.58	20		0.55	NE Atlantic		Boye et al., 2006. The Chemical speciation of iron in the north-east Atlantic Ocean. Deep-Sea Res. I, 53: 667-683.
3		1998	-23	42.58	30		0.48	NE Atlantic		Boye et al., 2006. The Chemical speciation of iron in the north-east Atlantic Ocean. Deep-Sea Res. I, 53: 667-683.
3		1998	-23	42.58	40		0.7	NE Atlantic		Boye et al., 2006. The Chemical speciation of iron in the north-east Atlantic Ocean. Deep-Sea Res. I, 53: 667-683.
3		1998	-23	42.58	50		0.65	NE Atlantic		Boye et al., 2006. The Chemical speciation of iron in the north-east Atlantic Ocean. Deep-Sea Res. I, 53: 667-683.
3		1998	-23	42.58	75		0.73	NE Atlantic		Boye et al., 2006. The Chemical speciation of iron in the north-east Atlantic Ocean. Deep-Sea Res. I, 53: 667-683.
3		1998	-23	42.58	100		1.09	NE Atlantic		Boye et al., 2006. The Chemical speciation of iron in the north-east Atlantic Ocean. Deep-Sea Res. I, 53: 667-683.
3		1998	-23	42.58	150		1.26	NE Atlantic		Boye et al., 2006. The Chemical speciation of iron in the north-east Atlantic Ocean. Deep-Sea Res. I, 53: 667-683.
3		1998	-23	42.58	200		1.22	NE Atlantic		Boye et al., 2006. The Chemical speciation of iron in the north-east Atlantic Ocean. Deep-Sea Res. I, 53: 667-683.
3		1998	-23.02	42.57	250		1.1	NE Atlantic		Boye et al., 2006. The Chemical speciation of iron in the north-east Atlantic Ocean. Deep-Sea Res. I, 53: 667-683.
3		1998	-23.02	42.57	500		1.16	NE Atlantic		Boye et al., 2006. The Chemical speciation of iron in the north-east Atlantic Ocean. Deep-Sea Res. I, 53: 667-683.
3		1998	-23.02	42.57	750		1.38	NE Atlantic		Boye et al., 2006. The Chemical speciation of iron in the north-east Atlantic Ocean. Deep-Sea Res. I, 53: 667-683.
3		1998	-23.02	42.57	900		1.46	NE Atlantic		Boye et al., 2006. The Chemical speciation of iron in the north-east Atlantic Ocean. Deep-Sea Res. I, 53: 667-683.
3		1998	-23.02	42.57	1000		1.43	NE Atlantic		Boye et al., 2006. The Chemical speciation of iron in the north-east Atlantic Ocean. Deep-Sea Res. I, 53: 667-683.
3		1998	-23.02	42.57	1500		1.36	NE Atlantic		Boye et al., 2006. The Chemical speciation of iron in the north-east Atlantic Ocean. Deep-Sea Res. I, 53: 667-683.
3		1998	-23.02	42.57	1750		1.31	NE Atlantic		Boye et al., 2006. The Chemical speciation of iron in the north-east Atlantic Ocean. Deep-Sea Res. I, 53: 667-683.
3		1998	-23.02	42.57	2000		1.35	NE Atlantic		Boye et al., 2006. The Chemical speciation of iron in the north-east Atlantic Ocean. Deep-Sea Res. I, 53: 667-683.
3		1998	-23	40	15		0.64	NE Atlantic		Boye et al., 2006. The Chemical speciation of iron in the north-east Atlantic Ocean. Deep-Sea Res. I, 53: 667-683.
3		1998	-23	40	20		0.61	NE Atlantic		Boye et al., 2006. The Chemical speciation of iron in the north-east Atlantic Ocean. Deep-Sea Res. I, 53: 667-683.
3		1998	-23	40	30		0.5	NE Atlantic		Boye et al., 2006. The Chemical speciation of iron in the north-east Atlantic Ocean. Deep-Sea Res. I, 53: 667-683.
3		1998	-23	40	40		0.73	NE Atlantic		Boye et al., 2006. The Chemical speciation of iron in the north-east Atlantic Ocean. Deep-Sea Res. I, 53: 667-683.
3		1998	-23	40	50		0.83	NE Atlantic		Boye et al., 2006. The Chemical speciation of iron in the north-east Atlantic Ocean. Deep-Sea Res. I, 53: 667-683.
3		1998	-23	40	65		1.17	NE Atlantic		Boye et al., 2006. The Chemical speciation of iron in the north-east Atlantic Ocean. Deep-Sea Res. I, 53: 667-683.
3		1998	-23	40	115		1.33	NE Atlantic		Boye et al., 2006. The Chemical speciation of iron in the north-east Atlantic Ocean. Deep-Sea Res. I, 53: 667-683.
3		1998	-23	40	165		1.4	NE Atlantic		Boye et al., 2006. The Chemical speciation of iron in the north-east Atlantic Ocean. Deep-Sea Res. I, 53: 667-683.
3		1998	-23	40	200		1.35	NE Atlantic		Boye et al., 2006. The Chemical speciation of iron in the north-east Atlantic Ocean. Deep-Sea Res. I, 53: 667-683.
3		1998	-23	40	250		1.2	NE Atlantic		Boye et al., 2006. The Chemical speciation of iron in the north-east Atlantic Ocean. Deep-Sea Res. I, 53: 667-683.
3		1998	-23	40.01	500		1.33	NE Atlantic		Boye et al., 2006. The Chemical speciation of iron in the north-east Atlantic Ocean. Deep-Sea Res. I, 53: 667-683.
3		1998	-23	40.01	700		1.4	NE Atlantic		Boye et al., 2006. The Chemical speciation of iron in the north-east Atlantic Ocean. Deep-Sea Res. I, 53: 667-683.
3		1998	-23	40.01	890		1.41	NE Atlantic		Boye et al., 2006. The Chemical speciation of iron in the north-east Atlantic Ocean. Deep-Sea Res. I, 53: 667-683.
3		1998	-23	40.01	1000		1.53	NE Atlantic		Boye et al., 2006. The Chemical speciation of iron in the north-east Atlantic Ocean. Deep-Sea Res. I, 53: 667-683.
3		1998	-23	40.01	1065		1.55	NE Atlantic		Boye et al., 2006. The Chemical speciation of iron in the north-east Atlantic Ocean. Deep-Sea Res. I, 53: 667-683.
3		1998	-23	40.01	1500		1.46	NE Atlantic		Boye et al., 2006. The Chemical speciation of iron in the north-east Atlantic Ocean. Deep-Sea Res. I, 53: 667-683.
3		1998	-23	40.01	2000		1.49	NE Atlantic		Boye et al., 2006. The Chemical speciation of iron in the north-east Atlantic Ocean. Deep-Sea Res. I, 53: 667-683.
3		1998	-23	37.01	10		0.63	NE Atlantic		Boye et al., 2006. The Chemical speciation of iron in the north-east Atlantic Ocean. Deep-Sea Res. I, 53: 667-683.
3		1998	-23	37.01	20		0.62	NE Atlantic		Boye et al., 2006. The Chemical speciation of iron in the north-east Atlantic Ocean. Deep-Sea Res. I, 53: 667-683.
3		1998	-23	37.01	30		0.58	NE Atlantic		Boye et al., 2006. The Chemical speciation of iron in the north-east Atlantic Ocean. Deep-Sea Res. I, 53: 667-683.
3		1998	-23	37.01	40		0.83	NE Atlantic		Boye et al., 2006. The Chemical speciation of iron in the north-east Atlantic Ocean. Deep-Sea Res. I, 53: 667-683.
3		1998	-23	37.01	50		1.03	NE Atlantic		Boye et al., 2006. The Chemical speciation of iron in the north-east Atlantic Ocean. Deep-Sea Res. I, 53: 667-683.
3		1998	-23	37.01	75		1.09	NE Atlantic		Boye et al., 2006. The Chemical speciation of iron in the north-east Atlantic Ocean. Deep-Sea Res. I, 53: 667-683.
3		1998	-23	37.01	100		1.09	NE Atlantic		Boye et al., 2006. The Chemical speciation of iron in the north-east Atlantic Ocean. Deep-Sea Res. I, 53: 667-683.
3		1998	-23	37.01	150		1.3	NE Atlantic		Boye et al., 2006. The Chemical speciation of iron in the north-east Atlantic Ocean. Deep-Sea Res. I, 53: 667-683.
3		1998	-23	37.01	200		1.33	NE Atlantic		Boye et al., 2006. The Chemical speciation of iron in the north-east Atlantic Ocean. Deep-Sea Res. I, 53: 667-683.
3	22	1998	-23.01	46.67	0	0	0.7	NEATL		Boye, M., Aldrich, A., van den Berg, C., deJong, J., Veldhuis, M. And de Baar, H. 2003. Horizontal gradient of the chemical speciation of iron in surface waters of the northeast Atlantic Ocean. Mar. Chem. 80, 129-143
3	23	1998	-15.09	48.41	0	0	0.88	NEATL		Boye, M., Aldrich, A., van den Berg, C., deJong, J., Veldhuis, M. And de Baar, H. 2003. Horizontal gradient of the chemical speciation of iron in surface waters of the northeast Atlantic Ocean. Mar. Chem. 80, 129-143
3	21	1998	-22.99	44.87	0	0	0.53	NEATL		Boye, M., Aldrich, A., van den Berg, C., deJong, J., Veldhuis, M. And de Baar, H. 2003. Horizontal gradient of the chemical speciation of iron in surface waters of the northeast Atlantic Ocean. Mar. Chem. 80, 129-143
3	23	1998	-17.17	48.18	0	0	0.77	NEATL		Boye, M., Aldrich, A., van den Berg, C., deJong, J., Veldhuis, M. And de Baar, H. 2003. Horizontal gradient of the chemical speciation of iron in surface waters of the northeast Atlantic Ocean. Mar. Chem. 80, 129-143
3	21	1998	-23.01	42.38	0	0	0.63	NEATL		Boye, M., Aldrich, A., van den Berg, C., deJong, J., Veldhuis, M. And de Baar, H. 2003. Horizontal gradient of the chemical speciation of iron in surface waters of the northeast Atlantic Ocean. Mar. Chem. 80, 129-143
3	22	1998	-23.01	47.37	0	0	0.63	NEATL		Boye, M., Aldrich, A., van den Berg, C., deJong, J., Veldhuis, M. And de Baar, H. 2003. Horizontal gradient of the chemical speciation of iron in surface waters of the northeast Atlantic Ocean. Mar. Chem. 80, 129-143
3	24	1998	-14.03	48.55	0	0	1.06	NEATL		Boye, M., Aldrich, A., van den Berg, C., deJong, J., Veldhuis, M. And de Baar, H. 2003. Horizontal gradient of the chemical speciation of iron in surface waters of the northeast Atlantic Ocean. Mar. Chem. 80, 129-143
3	23	1998	-16.15	48.3	0	0	0.83	NEATL		Boye, M., Aldrich, A., van den Berg, C., deJong, J., Veldhuis, M. And de Baar, H. 2003. Horizontal gradient of the chemical speciation of iron in surface waters of the northeast Atlantic Ocean. Mar. Chem. 80, 129-143
3	21	1998	-23.01	43.82	0	0	0.67	NEATL		Boye, M., Aldrich, A., van den Berg, C., deJong, J., Veldhuis, M. And de Baar, H. 2003. Horizontal gradient of the chemical speciation of iron in surface waters of the northeast Atlantic Ocean. Mar. Chem. 80, 129-143
3	24	1998	-11.93	48.78	0	0	1.07	NEATL		Boye, M., Aldrich, A., van den Berg, C., deJong, J., Veldhuis, M. And de Baar, H. 2003. Horizontal gradient of the chemical speciation of iron in surface waters of the northeast Atlantic Ocean. Mar. Chem. 80, 129-143
3	24	1998	-12.99	48.65	0	0	1.03	NEATL		Boye, M., Aldrich, A., van den Berg, C., deJong, J., Veldhuis, M. And de Baar, H. 2003. Horizontal gradient of the chemical speciation of iron in surface waters of the northeast Atlantic Ocean. Mar. Chem. 80, 129-143
3	21	1998	-23.01	43.11	0	0	0.85	NEATL		Boye, M., Aldrich, A., van den Berg, C., deJong, J., Veldhuis, M. And de Baar, H. 2003. Horizontal gradient of the chemical speciation of iron in surface waters of the northeast Atlantic Ocean. Mar. Chem. 80, 129-143
3	22	1998	-21.21	47.69	0	0	0.58	NEATL		Boye, M., Aldrich, A., van den Berg, C., deJong, J., Veldhuis, M. And de Baar, H. 2003. Horizontal gradient of the chemical speciation of iron in surface waters of the northeast Atlantic Ocean. Mar. Chem. 80, 129-143
3	23	1998	-19.23	47.97	0	0	0.82	NEATL		Boye, M., Aldrich, A., van den Berg, C., deJong, J., Veldhuis, M. And de Baar, H. 2003. Horizontal gradient of the chemical speciation of iron in surface waters of the northeast Atlantic Ocean. Mar. Chem. 80, 129-143
3	22	1998	-23.01	45.23	0	0	0.66	NEATL		Boye, M., Aldrich, A., van den Berg, C., deJong, J., Veldhuis, M. And de Baar, H. 2003. Horizontal gradient of the chemical speciation of iron in surface waters of the northeast Atlantic Ocean. Mar. Chem. 80, 129-143
4		1999	20	-49.33	20		0.18	S. Ocean-ATL		Boye, M., C.M.G. van den Berg, J.T.M. de Jong, H. Leach, P. Croot, H.J.W. de Baar, 2001. Organic complexation of iron in the Southern Ocean, Deep-Sea. Res. I, 48, 2001, 1477-1497
4		1999	20	-49.83	20		0.05	S. Ocean-ATL		Boye, M., C.M.G. van den Berg, J.T.M. de Jong, H. Leach, P. Croot, H.J.W. de Baar, 2001. Organic complexation of iron in the Southern Ocean, Deep-Sea. Res. I, 48, 2001, 1477-1497
4		1999	18.5	-60	20		0.18	S. Ocean-ATL		Boye, M., C.M.G. van den Berg, J.T.M. de Jong, H. Leach, P. Croot, H.J.W. de Baar, 2001. Organic complexation of iron in the Southern Ocean, Deep-Sea. Res. I, 48, 2001, 1477-1497
4		1999	6.13	-70.23	20		0.17	S. Ocean-ATL		Boye, M., C.M.G. van den Berg, J.T.M. de Jong, H. Leach, P. Croot, H.J.W. de Baar, 2001. Organic complexation of iron in the Southern Ocean, Deep-Sea. Res. I, 48, 2001, 1477-1497
4		1999	20	-48.83	20		0.43	S. Ocean-ATL		Boye, M., C.M.G. van den Berg, J.T.M. de Jong, H. Leach, P. Croot, H.J.W. de Baar, 2001. Organic complexation of iron in the Southern Ocean, Deep-Sea. Res. I, 48, 2001, 1477-1497
4		1999	20	-54	20		0.29	S. Ocean-ATL		Boye, M., C.M.G. van den Berg, J.T.M. de Jong, H. Leach, P. Croot, H.J.W. de Baar, 2001. Organic complexation of iron in the Southern Ocean, Deep-Sea. Res. I, 48, 2001, 1477-1497
4		1999	0	-67	25		0.06	S. Ocean-ATL		Boye, M., C.M.G. van den Berg, J.T.M. de Jong, H. Leach, P. Croot, H.J.W. de Baar, 2001. Organic complexation of iron in the Southern Ocean, Deep-Sea. Res. I, 48, 2001, 1477-1497
4		1999	20	-49.33	40		0.13	S. Ocean-ATL		Boye, M., C.M.G. van den Berg, J.T.M. de Jong, H. Leach, P. Croot, H.J.W. de Baar, 2001. Organic complexation of iron in the Southern Ocean, Deep-Sea. Res. I, 48, 2001, 1477-1497
4		1999	20	-48.83	40		0.24	S. Ocean-ATL		Boye, M., C.M.G. van den Berg, J.T.M. de Jong, H. Leach, P. Croot, H.J.W. de Baar, 2001. Organic complexation of iron in the Southern Ocean, Deep-Sea. Res. I, 48, 2001, 1477-1497
4		1999	20	-49.83	40		0.09	S. Ocean-ATL		Boye, M., C.M.G. van den Berg, J.T.M. de Jong, H. Leach, P. Croot, H.J.W. de Baar, 2001. Organic complexation of iron in the Southern Ocean, Deep-Sea. Res. I, 48, 2001, 1477-1497
4		1999	20	-54	40		0.28	S. Ocean-ATL		Boye, M., C.M.G. van den Berg, J.T.M. de Jong, H. Leach, P. Croot, H.J.W. de Baar, 2001. Organic complexation of iron in the Southern Ocean, Deep-Sea. Res. I, 48, 2001, 1477-1497
4		1999	6.13	-70.23	40		0.12	S. Ocean-ATL		Boye, M., C.M.G. van den Berg, J.T.M. de Jong, H. Leach, P. Croot, H.J.W. de Baar, 2001. Organic complexation of iron in the Southern Ocean, Deep-Sea. Res. I, 48, 2001, 1477-1497
4		1999	0	-67	50		0.2	S. Ocean-ATL		Boye, M., C.M.G. van den Berg, J.T.M. de Jong, H. Leach, P. Croot, H.J.W. de Baar, 2001. Organic complexation of iron in the Southern Ocean, Deep-Sea. Res. I, 48, 2001, 1477-1497
4		1999	6.13	-70.23	60		0.32	S. Ocean-ATL		Boye, M., C.M.G. van den Berg, J.T.M. de Jong, H. Leach, P. Croot, H.J.W. de Baar, 2001. Organic complexation of iron in the Southern Ocean, Deep-Sea. Res. I, 48, 2001, 1477-1497
4		1999	18.5	-60	60		0.15	S. Ocean-ATL		Boye, M., C.M.G. van den Berg, J.T.M. de Jong, H. Leach, P. Croot, H.J.W. de Baar, 2001. Organic complexation of iron in the Southern Ocean, Deep-Sea. Res. I, 48, 2001, 1477-1497
4		1999	20	-54	60		0.11	S. Ocean-ATL		Boye, M., C.M.G. van den Berg, J.T.M. de Jong, H. Leach, P. Croot, H.J.W. de Baar, 2001. Organic complexation of iron in the Southern Ocean, Deep-Sea. Res. I, 48, 2001, 1477-1497
4		1999	20	-49.33	60		0.05	S. Ocean-ATL		Boye, M., C.M.G. van den Berg, J.T.M. de Jong, H. Leach, P. Croot, H.J.W. de Baar, 2001. Organic complexation of iron in the Southern Ocean, Deep-Sea. Res. I, 48, 2001, 1477-1497
4		1999	20	-54	80		0.28	S. Ocean-ATL		Boye, M., C.M.G. van den Berg, J.T.M. de Jong, H. Leach, P. Croot, H.J.W. de Baar, 2001. Organic complexation of iron in the Southern Ocean, Deep-Sea. Res. I, 48, 2001, 1477-1497
4		1999	20	-49.33	80		0.08	S. Ocean-ATL		Boye, M., C.M.G. van den Berg, J.T.M. de Jong, H. Leach, P. Croot, H.J.W. de Baar, 2001. Organic complexation of iron in the Southern Ocean, Deep-Sea. Res. I, 48, 2001, 1477-1497
4		1999	20	-49.83	80		0.09	S. Ocean-ATL		Boye, M., C.M.G. van den Berg, J.T.M. de Jong, H. Leach, P. Croot, H.J.W. de Baar, 2001. Organic complexation of iron in the Southern Ocean, Deep-Sea. Res. I, 48, 2001, 1477-1497
4		1999	6.13	-70.23	100		0.22	S. Ocean-ATL		Boye, M., C.M.G. van den Berg, J.T.M. de Jong, H. Leach, P. Croot, H.J.W. de Baar, 2001. Organic complexation of iron in the Southern Ocean, Deep-Sea. Res. I, 48, 2001, 1477-1497
4		1999	20	-49.33	100		0.13	S. Ocean-ATL		Boye, M., C.M.G. van den Berg, J.T.M. de Jong, H. Leach, P. Croot, H.J.W. de Baar, 2001. Organic complexation of iron in the Southern Ocean, Deep-Sea. Res. I, 48, 2001, 1477-1497
4		1999	20	-48.83	100		0.1	S. Ocean-ATL		Boye, M., C.M.G. van den Berg, J.T.M. de Jong, H. Leach, P. Croot, H.J.W. de Baar, 2001. Organic complexation of iron in the Southern Ocean, Deep-Sea. Res. I, 48, 2001, 1477-1497
4		1999	20	-54	100		0.37	S. Ocean-ATL		Boye, M., C.M.G. van den Berg, J.T.M. de Jong, H. Leach, P. Croot, H.J.W. de Baar, 2001. Organic complexation of iron in the Southern Ocean, Deep-Sea. Res. I, 48, 2001, 1477-1497
4		1999	0	-67	100		0.11	S. Ocean-ATL		Boye, M., C.M.G. van den Berg, J.T.M. de Jong, H. Leach, P. Croot, H.J.W. de Baar, 2001. Organic complexation of iron in the Southern Ocean, Deep-Sea. Res. I, 48, 2001, 1477-1497
4		1999	18.5	-60	100		0.19	S. Ocean-ATL		Boye, M., C.M.G. van den Berg, J.T.M. de Jong, H. Leach, P. Croot, H.J.W. de Baar, 2001. Organic complexation of iron in the Southern Ocean, Deep-Sea. Res. I, 48, 2001, 1477-1497
4		1999	20	-49.83	100		0.09	S. Ocean-ATL		Boye, M., C.M.G. van den Berg, J.T.M. de Jong, H. Leach, P. Croot, H.J.W. de Baar, 2001. Organic complexation of iron in the Southern Ocean, Deep-Sea. Res. I, 48, 2001, 1477-1497
4		1999	20	-49.33	129		0.15	S. Ocean-ATL		Boye, M., C.M.G. van den Berg, J.T.M. de Jong, H. Leach, P. Croot, H.J.W. de Baar, 2001. Organic complexation of iron in the Southern Ocean, Deep-Sea. Res. I, 48, 2001, 1477-1497
4		1999	20	-54	130		0.27	S. Ocean-ATL		Boye, M., C.M.G. van den Berg, J.T.M. de Jong, H. Leach, P. Croot, H.J.W. de Baar, 2001. Organic complexation of iron in the Southern Ocean, Deep-Sea. Res. I, 48, 2001, 1477-1497
4		1999	20	-49.33	150		0.13	S. Ocean-ATL		Boye, M., C.M.G. van den Berg, J.T.M. de Jong, H. Leach, P. Croot, H.J.W. de Baar, 2001. Organic complexation of iron in the Southern Ocean, Deep-Sea. Res. I, 48, 2001, 1477-1497
4		1999	20	-48.83	150		0.51	S. Ocean-ATL		Boye, M., C.M.G. van den Berg, J.T.M. de Jong, H. Leach, P. Croot, H.J.W. de Baar, 2001. Organic complexation of iron in the Southern Ocean, Deep-Sea. Res. I, 48, 2001, 1477-1497
4		1999	20	-49.83	150		0.19	S. Ocean-ATL		Boye, M., C.M.G. van den Berg, J.T.M. de Jong, H. Leach, P. Croot, H.J.W. de Baar, 2001. Organic complexation of iron in the Southern Ocean, Deep-Sea. Res. I, 48, 2001, 1477-1497
4		1999	6.13	-70.23	150		0.15	S. Ocean-ATL		Boye, M., C.M.G. van den Berg, J.T.M. de Jong, H. Leach, P. Croot, H.J.W. de Baar, 2001. Organic complexation of iron in the Southern Ocean, Deep-Sea. Res. I, 48, 2001, 1477-1497
4		1999	6.13	-70.23	200		0.15	S. Ocean-ATL		Boye, M., C.M.G. van den Berg, J.T.M. de Jong, H. Leach, P. Croot, H.J.W. de Baar, 2001. Organic complexation of iron in the Southern Ocean, Deep-Sea. Res. I, 48, 2001, 1477-1497
4		1999	18.5	-60	250		0.18	S. Ocean-ATL		Boye, M., C.M.G. van den Berg, J.T.M. de Jong, H. Leach, P. Croot, H.J.W. de Baar, 2001. Organic complexation of iron in the Southern Ocean, Deep-Sea. Res. I, 48, 2001, 1477-1497
4		1999	20	-48.83	250		0.35	S. Ocean-ATL		Boye, M., C.M.G. van den Berg, J.T.M. de Jong, H. Leach, P. Croot, H.J.W. de Baar, 2001. Organic complexation of iron in the Southern Ocean, Deep-Sea. Res. I, 48, 2001, 1477-1497
4		1999	0	-67	250		0.14	S. Ocean-ATL		Boye, M., C.M.G. van den Berg, J.T.M. de Jong, H. Leach, P. Croot, H.J.W. de Baar, 2001. Organic complexation of iron in the Southern Ocean, Deep-Sea. Res. I, 48, 2001, 1477-1497
4		1999	20	-49.33	250		0.08	S. Ocean-ATL		Boye, M., C.M.G. van den Berg, J.T.M. de Jong, H. Leach, P. Croot, H.J.W. de Baar, 2001. Organic complexation of iron in the Southern Ocean, Deep-Sea. Res. I, 48, 2001, 1477-1497
4		1999	20	-49.83	250		0.1	S. Ocean-ATL		Boye, M., C.M.G. van den Berg, J.T.M. de Jong, H. Leach, P. Croot, H.J.W. de Baar, 2001. Organic complexation of iron in the Southern Ocean, Deep-Sea. Res. I, 48, 2001, 1477-1497
4		1999	20	-54	250		0.11	S. Ocean-ATL		Boye, M., C.M.G. van den Berg, J.T.M. de Jong, H. Leach, P. Croot, H.J.W. de Baar, 2001. Organic complexation of iron in the Southern Ocean, Deep-Sea. Res. I, 48, 2001, 1477-1497
4		1999	6.13	-70.23	271		0.16	S. Ocean-ATL		Boye, M., C.M.G. van den Berg, J.T.M. de Jong, H. Leach, P. Croot, H.J.W. de Baar, 2001. Organic complexation of iron in the Southern Ocean, Deep-Sea. Res. I, 48, 2001, 1477-1497
4		1999	20	-49.33	293		0.23	S. Ocean-ATL		Boye, M., C.M.G. van den Berg, J.T.M. de Jong, H. Leach, P. Croot, H.J.W. de Baar, 2001. Organic complexation of iron in the Southern Ocean, Deep-Sea. Res. I, 48, 2001, 1477-1497
4		1999	20	-48.83	298		0.21	S. Ocean-ATL		Boye, M., C.M.G. van den Berg, J.T.M. de Jong, H. Leach, P. Croot, H.J.W. de Baar, 2001. Organic complexation of iron in the Southern Ocean, Deep-Sea. Res. I, 48, 2001, 1477-1497
4		1999	18.5	-60	300		0.26	S. Ocean-ATL		Boye, M., C.M.G. van den Berg, J.T.M. de Jong, H. Leach, P. Croot, H.J.W. de Baar, 2001. Organic complexation of iron in the Southern Ocean, Deep-Sea. Res. I, 48, 2001, 1477-1497
4		1999	20	-54	400		0.16	S. Ocean-ATL		Boye, M., C.M.G. van den Berg, J.T.M. de Jong, H. Leach, P. Croot, H.J.W. de Baar, 2001. Organic complexation of iron in the Southern Ocean, Deep-Sea. Res. I, 48, 2001, 1477-1497
4		1999	18.5	-60	400		0.28	S. Ocean-ATL		Boye, M., C.M.G. van den Berg, J.T.M. de Jong, H. Leach, P. Croot, H.J.W. de Baar, 2001. Organic complexation of iron in the Southern Ocean, Deep-Sea. Res. I, 48, 2001, 1477-1497
4		1999	20	-48.83	478		0.64	S. Ocean-ATL		Boye, M., C.M.G. van den Berg, J.T.M. de Jong, H. Leach, P. Croot, H.J.W. de Baar, 2001. Organic complexation of iron in the Southern Ocean, Deep-Sea. Res. I, 48, 2001, 1477-1497
4		1999	20	-49.83	500		0.25	S. Ocean-ATL		Boye, M., C.M.G. van den Berg, J.T.M. de Jong, H. Leach, P. Croot, H.J.W. de Baar, 2001. Organic complexation of iron in the Southern Ocean, Deep-Sea. Res. I, 48, 2001, 1477-1497
4		1999	0	-67	500		0.15	S. Ocean-ATL		Boye, M., C.M.G. van den Berg, J.T.M. de Jong, H. Leach, P. Croot, H.J.W. de Baar, 2001. Organic complexation of iron in the Southern Ocean, Deep-Sea. Res. I, 48, 2001, 1477-1497
4		1999	20	-49.33	528		0.29	S. Ocean-ATL		Boye, M., C.M.G. van den Berg, J.T.M. de Jong, H. Leach, P. Croot, H.J.W. de Baar, 2001. Organic complexation of iron in the Southern Ocean, Deep-Sea. Res. I, 48, 2001, 1477-1497
4		1999	6.13	-70.23	610		0.2	S. Ocean-ATL		Boye, M., C.M.G. van den Berg, J.T.M. de Jong, H. Leach, P. Croot, H.J.W. de Baar, 2001. Organic complexation of iron in the Southern Ocean, Deep-Sea. Res. I, 48, 2001, 1477-1497
4		1999	20	-54	700		0.48	S. Ocean-ATL		Boye, M., C.M.G. van den Berg, J.T.M. de Jong, H. Leach, P. Croot, H.J.W. de Baar, 2001. Organic complexation of iron in the Southern Ocean, Deep-Sea. Res. I, 48, 2001, 1477-1497
4		1999	20	-48.83	701		0.38	S. Ocean-ATL		Boye, M., C.M.G. van den Berg, J.T.M. de Jong, H. Leach, P. Croot, H.J.W. de Baar, 2001. Organic complexation of iron in the Southern Ocean, Deep-Sea. Res. I, 48, 2001, 1477-1497
4		1999	20	-49.83	750		0.02	S. Ocean-ATL		Boye, M., C.M.G. van den Berg, J.T.M. de Jong, H. Leach, P. Croot, H.J.W. de Baar, 2001. Organic complexation of iron in the Southern Ocean, Deep-Sea. Res. I, 48, 2001, 1477-1497
4		1999	20	-48.83	800		0.11	S. Ocean-ATL		Boye, M., C.M.G. van den Berg, J.T.M. de Jong, H. Leach, P. Croot, H.J.W. de Baar, 2001. Organic complexation of iron in the Southern Ocean, Deep-Sea. Res. I, 48, 2001, 1477-1497
4		1999	6.13	-70.23	986		0.26	S. Ocean-ATL		Boye, M., C.M.G. van den Berg, J.T.M. de Jong, H. Leach, P. Croot, H.J.W. de Baar, 2001. Organic complexation of iron in the Southern Ocean, Deep-Sea. Res. I, 48, 2001, 1477-1497
4		1999	18.5	-60	1000		0.26	S. Ocean-ATL		Boye, M., C.M.G. van den Berg, J.T.M. de Jong, H. Leach, P. Croot, H.J.W. de Baar, 2001. Organic complexation of iron in the Southern Ocean, Deep-Sea. Res. I, 48, 2001, 1477-1497
4		1999	20	-54	1000		0.18	S. Ocean-ATL		Boye, M., C.M.G. van den Berg, J.T.M. de Jong, H. Leach, P. Croot, H.J.W. de Baar, 2001. Organic complexation of iron in the Southern Ocean, Deep-Sea. Res. I, 48, 2001, 1477-1497
4		1999	0	-67	1000		0.24	S. Ocean-ATL		Boye, M., C.M.G. van den Berg, J.T.M. de Jong, H. Leach, P. Croot, H.J.W. de Baar, 2001. Organic complexation of iron in the Southern Ocean, Deep-Sea. Res. I, 48, 2001, 1477-1497
4		1999	20	-49.83	1000		0.07	S. Ocean-ATL		Boye, M., C.M.G. van den Berg, J.T.M. de Jong, H. Leach, P. Croot, H.J.W. de Baar, 2001. Organic complexation of iron in the Southern Ocean, Deep-Sea. Res. I, 48, 2001, 1477-1497
4		1999	0	-67	1500		0.28	S. Ocean-ATL		Boye, M., C.M.G. van den Berg, J.T.M. de Jong, H. Leach, P. Croot, H.J.W. de Baar, 2001. Organic complexation of iron in the Southern Ocean, Deep-Sea. Res. I, 48, 2001, 1477-1497
4		1999	18.5	-60	2000		0.29	S. Ocean-ATL		Boye, M., C.M.G. van den Berg, J.T.M. de Jong, H. Leach, P. Croot, H.J.W. de Baar, 2001. Organic complexation of iron in the Southern Ocean, Deep-Sea. Res. I, 48, 2001, 1477-1497
4		1999	0	-67	2500		0.29	S. Ocean-ATL		Boye, M., C.M.G. van den Berg, J.T.M. de Jong, H. Leach, P. Croot, H.J.W. de Baar, 2001. Organic complexation of iron in the Southern Ocean, Deep-Sea. Res. I, 48, 2001, 1477-1497
4		1999	18.5	-60	3000		0.4	S. Ocean-ATL		Boye, M., C.M.G. van den Berg, J.T.M. de Jong, H. Leach, P. Croot, H.J.W. de Baar, 2001. Organic complexation of iron in the Southern Ocean, Deep-Sea. Res. I, 48, 2001, 1477-1497
4		1999	0	-67	3500		0.28	S. Ocean-ATL		Boye, M., C.M.G. van den Berg, J.T.M. de Jong, H. Leach, P. Croot, H.J.W. de Baar, 2001. Organic complexation of iron in the Southern Ocean, Deep-Sea. Res. I, 48, 2001, 1477-1497
4		1999	18.5	-60	4000		0.35	S. Ocean-ATL		Boye, M., C.M.G. van den Berg, J.T.M. de Jong, H. Leach, P. Croot, H.J.W. de Baar, 2001. Organic complexation of iron in the Southern Ocean, Deep-Sea. Res. I, 48, 2001, 1477-1497
4		1999	0	-67	4500		0.31	S. Ocean-ATL		Boye, M., C.M.G. van den Berg, J.T.M. de Jong, H. Leach, P. Croot, H.J.W. de Baar, 2001. Organic complexation of iron in the Southern Ocean, Deep-Sea. Res. I, 48, 2001, 1477-1497
4		1999	18.5	-60	4500		0.29	S. Ocean-ATL		Boye, M., C.M.G. van den Berg, J.T.M. de Jong, H. Leach, P. Croot, H.J.W. de Baar, 2001. Organic complexation of iron in the Southern Ocean, Deep-Sea. Res. I, 48, 2001, 1477-1497
4		2001	-158	22.75	1	0.65	0.6656	HOT/Aloha		Boyle et al., 2005. Iron, manganese and lead at Hawaii Ocean Time-Series station ALOHA: Temporal variability and an intermediate water hydrothermal plume. Geochimca et Cosmochimica Acta, 69: 933-952.
4		2001	-158	22.75	20	0.74	0.75776	HOT/Aloha		Boyle et al., 2005. Iron, manganese and lead at Hawaii Ocean Time-Series station ALOHA: Temporal variability and an intermediate water hydrothermal plume. Geochimca et Cosmochimica Acta, 69: 933-952.
4		2001	-158	22.75	75	0.41	0.41984	HOT/Aloha		Boyle et al., 2005. Iron, manganese and lead at Hawaii Ocean Time-Series station ALOHA: Temporal variability and an intermediate water hydrothermal plume. Geochimca et Cosmochimica Acta, 69: 933-952.
4		2001	-158	22.75	317	0.4	0.4096	HOT/Aloha		Boyle et al., 2005. Iron, manganese and lead at Hawaii Ocean Time-Series station ALOHA: Temporal variability and an intermediate water hydrothermal plume. Geochimca et Cosmochimica Acta, 69: 933-952.
4		2001	-158	22.75	476	0.44	0.45056	HOT/Aloha		Boyle et al., 2005. Iron, manganese and lead at Hawaii Ocean Time-Series station ALOHA: Temporal variability and an intermediate water hydrothermal plume. Geochimca et Cosmochimica Acta, 69: 933-952.
4		2001	-158	22.75	807	0.5	0.512	HOT/Aloha		Boyle et al., 2005. Iron, manganese and lead at Hawaii Ocean Time-Series station ALOHA: Temporal variability and an intermediate water hydrothermal plume. Geochimca et Cosmochimica Acta, 69: 933-952.
4		2001	-158	22.75	998	0.47	0.48128	HOT/Aloha		Boyle et al., 2005. Iron, manganese and lead at Hawaii Ocean Time-Series station ALOHA: Temporal variability and an intermediate water hydrothermal plume. Geochimca et Cosmochimica Acta, 69: 933-952.
4		2001	-158	22.75	1162	0.76	0.77824	HOT/Aloha		Boyle et al., 2005. Iron, manganese and lead at Hawaii Ocean Time-Series station ALOHA: Temporal variability and an intermediate water hydrothermal plume. Geochimca et Cosmochimica Acta, 69: 933-952.
4		2001	-158	22.75	1260	0.65	0.6656	HOT/Aloha		Boyle et al., 2005. Iron, manganese and lead at Hawaii Ocean Time-Series station ALOHA: Temporal variability and an intermediate water hydrothermal plume. Geochimca et Cosmochimica Acta, 69: 933-952.
4		2001	-158	22.75	1517	0.58	0.59392	HOT/Aloha		Boyle et al., 2005. Iron, manganese and lead at Hawaii Ocean Time-Series station ALOHA: Temporal variability and an intermediate water hydrothermal plume. Geochimca et Cosmochimica Acta, 69: 933-952.
4		2001	-158	22.75	1951	0.58	0.59392	HOT/Aloha		Boyle et al., 2005. Iron, manganese and lead at Hawaii Ocean Time-Series station ALOHA: Temporal variability and an intermediate water hydrothermal plume. Geochimca et Cosmochimica Acta, 69: 933-952.
4		2001	-158	22.75	2848	0.41	0.41984	HOT/Aloha		Boyle et al., 2005. Iron, manganese and lead at Hawaii Ocean Time-Series station ALOHA: Temporal variability and an intermediate water hydrothermal plume. Geochimca et Cosmochimica Acta, 69: 933-952.
4		2001	-158	22.75	3322	0.45	0.4608	HOT/Aloha		Boyle et al., 2005. Iron, manganese and lead at Hawaii Ocean Time-Series station ALOHA: Temporal variability and an intermediate water hydrothermal plume. Geochimca et Cosmochimica Acta, 69: 933-952.
4		2001	-158	22.75	3797	0.41	0.41984	HOT/Aloha		Boyle et al., 2005. Iron, manganese and lead at Hawaii Ocean Time-Series station ALOHA: Temporal variability and an intermediate water hydrothermal plume. Geochimca et Cosmochimica Acta, 69: 933-952.
7		2002	-158	22.75	10	0.46	0.47104	HOT/Aloha		Boyle et al., 2005. Iron, manganese and lead at Hawaii Ocean Time-Series station ALOHA: Temporal variability and an intermediate water hydrothermal plume. Geochimca et Cosmochimica Acta, 69: 933-952.
7		2002	-158	22.75	20	0.32	0.32768	HOT/Aloha		Boyle et al., 2005. Iron, manganese and lead at Hawaii Ocean Time-Series station ALOHA: Temporal variability and an intermediate water hydrothermal plume. Geochimca et Cosmochimica Acta, 69: 933-952.
7		2002	-158	22.75	30	0.44	0.45056	HOT/Aloha		Boyle et al., 2005. Iron, manganese and lead at Hawaii Ocean Time-Series station ALOHA: Temporal variability and an intermediate water hydrothermal plume. Geochimca et Cosmochimica Acta, 69: 933-952.
7		2002	-158	22.75	70	0.27	0.27648	HOT/Aloha		Boyle et al., 2005. Iron, manganese and lead at Hawaii Ocean Time-Series station ALOHA: Temporal variability and an intermediate water hydrothermal plume. Geochimca et Cosmochimica Acta, 69: 933-952.
7		2002	-158	22.75	110	0.09	0.09216	HOT/Aloha		Boyle et al., 2005. Iron, manganese and lead at Hawaii Ocean Time-Series station ALOHA: Temporal variability and an intermediate water hydrothermal plume. Geochimca et Cosmochimica Acta, 69: 933-952.
7		2002	-158	22.75	986	0.84	0.86016	HOT/Aloha		Boyle et al., 2005. Iron, manganese and lead at Hawaii Ocean Time-Series station ALOHA: Temporal variability and an intermediate water hydrothermal plume. Geochimca et Cosmochimica Acta, 69: 933-952.
7		2002	-158	22.75	1194	1	1.024	HOT/Aloha		Boyle et al., 2005. Iron, manganese and lead at Hawaii Ocean Time-Series station ALOHA: Temporal variability and an intermediate water hydrothermal plume. Geochimca et Cosmochimica Acta, 69: 933-952.
7		2002	-158	22.75	1429	0.75	0.768	HOT/Aloha		Boyle et al., 2005. Iron, manganese and lead at Hawaii Ocean Time-Series station ALOHA: Temporal variability and an intermediate water hydrothermal plume. Geochimca et Cosmochimica Acta, 69: 933-952.
7		2002	-158	22.75	1739	0.77	0.78848	HOT/Aloha		Boyle et al., 2005. Iron, manganese and lead at Hawaii Ocean Time-Series station ALOHA: Temporal variability and an intermediate water hydrothermal plume. Geochimca et Cosmochimica Acta, 69: 933-952.
7		2002	-158	22.75	2432	0.48	0.49152	HOT/Aloha		Boyle et al., 2005. Iron, manganese and lead at Hawaii Ocean Time-Series station ALOHA: Temporal variability and an intermediate water hydrothermal plume. Geochimca et Cosmochimica Acta, 69: 933-952.
7		2002	-158	22.75	2886	0.49	0.50176	HOT/Aloha		Boyle et al., 2005. Iron, manganese and lead at Hawaii Ocean Time-Series station ALOHA: Temporal variability and an intermediate water hydrothermal plume. Geochimca et Cosmochimica Acta, 69: 933-952.
7		2002	-158	22.75	3848	0.44	0.45056	HOT/Aloha		Boyle et al., 2005. Iron, manganese and lead at Hawaii Ocean Time-Series station ALOHA: Temporal variability and an intermediate water hydrothermal plume. Geochimca et Cosmochimica Acta, 69: 933-952.
5		1999	-158	22.75	1	0.5	0.512	HOT/Aloha		Boyle et al., 2005. Iron, manganese and lead at Hawaii Ocean Time-Series station ALOHA: Temporal variability and an intermediate water hydrothermal plume. Geochimca et Cosmochimica Acta, 69: 933-952.
5		1999	-158	22.75	1	0.51	0.52224	HOT/Aloha		Boyle et al., 2005. Iron, manganese and lead at Hawaii Ocean Time-Series station ALOHA: Temporal variability and an intermediate water hydrothermal plume. Geochimca et Cosmochimica Acta, 69: 933-952.
5		1999	-158	22.75	1	0.43	0.44032	HOT/Aloha		Boyle et al., 2005. Iron, manganese and lead at Hawaii Ocean Time-Series station ALOHA: Temporal variability and an intermediate water hydrothermal plume. Geochimca et Cosmochimica Acta, 69: 933-952.
5		1999	-158	22.75	10	0.3	0.3072	HOT/Aloha		Boyle et al., 2005. Iron, manganese and lead at Hawaii Ocean Time-Series station ALOHA: Temporal variability and an intermediate water hydrothermal plume. Geochimca et Cosmochimica Acta, 69: 933-952.
4		2001	-158	22.75	1	0.63	0.64512	HOT/Aloha		Boyle et al., 2005. Iron, manganese and lead at Hawaii Ocean Time-Series station ALOHA: Temporal variability and an intermediate water hydrothermal plume. Geochimca et Cosmochimica Acta, 69: 933-952.
4		2001	-158	22.75	20	0.69	0.70656	HOT/Aloha		Boyle et al., 2005. Iron, manganese and lead at Hawaii Ocean Time-Series station ALOHA: Temporal variability and an intermediate water hydrothermal plume. Geochimca et Cosmochimica Acta, 69: 933-952.
7		2002	-158	22.75	10	0.47	0.48128	HOT/Aloha		Boyle et al., 2005. Iron, manganese and lead at Hawaii Ocean Time-Series station ALOHA: Temporal variability and an intermediate water hydrothermal plume. Geochimca et Cosmochimica Acta, 69: 933-952.
7		2002	-158	22.75	20	0.35	0.3584	HOT/Aloha		Boyle et al., 2005. Iron, manganese and lead at Hawaii Ocean Time-Series station ALOHA: Temporal variability and an intermediate water hydrothermal plume. Geochimca et Cosmochimica Acta, 69: 933-952.
7		2002	-158	22.75	10	0.36	0.36864	HOT/Aloha		Boyle et al., 2005. Iron, manganese and lead at Hawaii Ocean Time-Series station ALOHA: Temporal variability and an intermediate water hydrothermal plume. Geochimca et Cosmochimica Acta, 69: 933-952.
10		2002	-158	22.75	0	0.57	0.58368	HOT/Aloha		Boyle et al., 2005. Iron, manganese and lead at Hawaii Ocean Time-Series station ALOHA: Temporal variability and an intermediate water hydrothermal plume. Geochimca et Cosmochimica Acta, 69: 933-952.
10		2002	-158	22.75	10	0.38	0.38912	HOT/Aloha		Boyle et al., 2005. Iron, manganese and lead at Hawaii Ocean Time-Series station ALOHA: Temporal variability and an intermediate water hydrothermal plume. Geochimca et Cosmochimica Acta, 69: 933-952.
10		2002	-158	22.75	40	0.54	0.55296	HOT/Aloha		Boyle et al., 2005. Iron, manganese and lead at Hawaii Ocean Time-Series station ALOHA: Temporal variability and an intermediate water hydrothermal plume. Geochimca et Cosmochimica Acta, 69: 933-952.
10		2002	-158	22.75	10	0.42	0.43008	HOT/Aloha		Boyle et al., 2005. Iron, manganese and lead at Hawaii Ocean Time-Series station ALOHA: Temporal variability and an intermediate water hydrothermal plume. Geochimca et Cosmochimica Acta, 69: 933-952.
10		2002	-158	22.75	40	0.5	0.512	HOT/Aloha		Boyle et al., 2005. Iron, manganese and lead at Hawaii Ocean Time-Series station ALOHA: Temporal variability and an intermediate water hydrothermal plume. Geochimca et Cosmochimica Acta, 69: 933-952.
5		2002	142.19	28.25	1		0.36	NW Pac		Brown et al., 2006. Dissolved and particulate Fe in the western and central North Pac.. Geochem, Geophys. Geosyst., 6, Q10001, doi: 10.1029/2004GC000893
5		2002	142.74	29	1		0.43	NW Pac		Brown et al., 2006. Dissolved and particulate Fe in the western and central North Pac.. Geochem, Geophys. Geosyst., 6, Q10001, doi: 10.1029/2004GC000893
5		2002	144.94	31.89	1		0.24	NW Pac		Brown et al., 2006. Dissolved and particulate Fe in the western and central North Pac.. Geochem, Geophys. Geosyst., 6, Q10001, doi: 10.1029/2004GC000893
5		2002	145.67	32.84	1		0.22	NW Pac		Brown et al., 2006. Dissolved and particulate Fe in the western and central North Pac.. Geochem, Geophys. Geosyst., 6, Q10001, doi: 10.1029/2004GC000893
5		2002	147.16	34.73	1		0.17	NW Pac		Brown et al., 2006. Dissolved and particulate Fe in the western and central North Pac.. Geochem, Geophys. Geosyst., 6, Q10001, doi: 10.1029/2004GC000893
5		2002	144.14	34.61	1		0.25	NW Pac		Brown et al., 2006. Dissolved and particulate Fe in the western and central North Pac.. Geochem, Geophys. Geosyst., 6, Q10001, doi: 10.1029/2004GC000893
5		2002	142.71	34.53	1		0.31	NW Pac		Brown et al., 2006. Dissolved and particulate Fe in the western and central North Pac.. Geochem, Geophys. Geosyst., 6, Q10001, doi: 10.1029/2004GC000893
5		2002	141.43	34.8	1		0.3	NW Pac		Brown et al., 2006. Dissolved and particulate Fe in the western and central North Pac.. Geochem, Geophys. Geosyst., 6, Q10001, doi: 10.1029/2004GC000893
5		2002	141.05	35.36	1		0.29	NW Pac		Brown et al., 2006. Dissolved and particulate Fe in the western and central North Pac.. Geochem, Geophys. Geosyst., 6, Q10001, doi: 10.1029/2004GC000893
5		2002	144.57	37.66	1		0.25	NW Pac		Brown et al., 2006. Dissolved and particulate Fe in the western and central North Pac.. Geochem, Geophys. Geosyst., 6, Q10001, doi: 10.1029/2004GC000893
5		2002	145.56	38.27	1		0.2	NW Pac		Brown et al., 2006. Dissolved and particulate Fe in the western and central North Pac.. Geochem, Geophys. Geosyst., 6, Q10001, doi: 10.1029/2004GC000893
5		2002	147.94	39.76	1		0.17	NW Pac		Brown et al., 2006. Dissolved and particulate Fe in the western and central North Pac.. Geochem, Geophys. Geosyst., 6, Q10001, doi: 10.1029/2004GC000893
5		2002	149.03	40.44	1		0.16	NW Pac		Brown et al., 2006. Dissolved and particulate Fe in the western and central North Pac.. Geochem, Geophys. Geosyst., 6, Q10001, doi: 10.1029/2004GC000893
5		2002	150.14	41.11	1		0.18	NW Pac		Brown et al., 2006. Dissolved and particulate Fe in the western and central North Pac.. Geochem, Geophys. Geosyst., 6, Q10001, doi: 10.1029/2004GC000893
5		2002	152.61	42.59	1		0.13	NW Pac		Brown et al., 2006. Dissolved and particulate Fe in the western and central North Pac.. Geochem, Geophys. Geosyst., 6, Q10001, doi: 10.1029/2004GC000893
5		2002	154.63	43.78	1		0.33	NW Pac		Brown et al., 2006. Dissolved and particulate Fe in the western and central North Pac.. Geochem, Geophys. Geosyst., 6, Q10001, doi: 10.1029/2004GC000893
5		2002	155.97	44.51	1		0.2	NW Pac		Brown et al., 2006. Dissolved and particulate Fe in the western and central North Pac.. Geochem, Geophys. Geosyst., 6, Q10001, doi: 10.1029/2004GC000893
5		2002	157.24	45.17	1		0.34	NW Pac		Brown et al., 2006. Dissolved and particulate Fe in the western and central North Pac.. Geochem, Geophys. Geosyst., 6, Q10001, doi: 10.1029/2004GC000893
5		2002	158.61	45.88	1		0.28	NW Pac		Brown et al., 2006. Dissolved and particulate Fe in the western and central North Pac.. Geochem, Geophys. Geosyst., 6, Q10001, doi: 10.1029/2004GC000893
5		2002	161.42	47.29	1		0.3	NW Pac		Brown et al., 2006. Dissolved and particulate Fe in the western and central North Pac.. Geochem, Geophys. Geosyst., 6, Q10001, doi: 10.1029/2004GC000893
5		2002	162.91	48.03	1		0.27	NW Pac		Brown et al., 2006. Dissolved and particulate Fe in the western and central North Pac.. Geochem, Geophys. Geosyst., 6, Q10001, doi: 10.1029/2004GC000893
5		2002	166.65	49.83	1		0.15	NW Pac		Brown et al., 2006. Dissolved and particulate Fe in the western and central North Pac.. Geochem, Geophys. Geosyst., 6, Q10001, doi: 10.1029/2004GC000893
5		2002	170.58	49.54	1		0.18	NW Pac		Brown et al., 2006. Dissolved and particulate Fe in the western and central North Pac.. Geochem, Geophys. Geosyst., 6, Q10001, doi: 10.1029/2004GC000893
5		2002	170.58	48.35	1		0.19	NW Pac		Brown et al., 2006. Dissolved and particulate Fe in the western and central North Pac.. Geochem, Geophys. Geosyst., 6, Q10001, doi: 10.1029/2004GC000893
5		2002	170.58	47.17	1		0.25	NW Pac		Brown et al., 2006. Dissolved and particulate Fe in the western and central North Pac.. Geochem, Geophys. Geosyst., 6, Q10001, doi: 10.1029/2004GC000893
5		2002	170.58	44.68	1		0.09	NW Pac		Brown et al., 2006. Dissolved and particulate Fe in the western and central North Pac.. Geochem, Geophys. Geosyst., 6, Q10001, doi: 10.1029/2004GC000893
5		2002	170.58	43.47	1		0.2	NW Pac		Brown et al., 2006. Dissolved and particulate Fe in the western and central North Pac.. Geochem, Geophys. Geosyst., 6, Q10001, doi: 10.1029/2004GC000893
5		2002	170.58	42.09	1		0.1	NW Pac		Brown et al., 2006. Dissolved and particulate Fe in the western and central North Pac.. Geochem, Geophys. Geosyst., 6, Q10001, doi: 10.1029/2004GC000893
5		2002	170.58	35.95	1		0.04	NW Pac		Brown et al., 2006. Dissolved and particulate Fe in the western and central North Pac.. Geochem, Geophys. Geosyst., 6, Q10001, doi: 10.1029/2004GC000893
5		2002	170.59	33.58	1		0.03	NW Pac		Brown et al., 2006. Dissolved and particulate Fe in the western and central North Pac.. Geochem, Geophys. Geosyst., 6, Q10001, doi: 10.1029/2004GC000893
5		2002	170.58	32.92	1		0.11	NW Pac		Brown et al., 2006. Dissolved and particulate Fe in the western and central North Pac.. Geochem, Geophys. Geosyst., 6, Q10001, doi: 10.1029/2004GC000893
5		2002	170.58	30.78	1		0.03	NW Pac		Brown et al., 2006. Dissolved and particulate Fe in the western and central North Pac.. Geochem, Geophys. Geosyst., 6, Q10001, doi: 10.1029/2004GC000893
5		2002	170.56	29.99	1		0.05	NW Pac		Brown et al., 2006. Dissolved and particulate Fe in the western and central North Pac.. Geochem, Geophys. Geosyst., 6, Q10001, doi: 10.1029/2004GC000893
5		2002	170.51	28.85	1		0.11	NW Pac		Brown et al., 2006. Dissolved and particulate Fe in the western and central North Pac.. Geochem, Geophys. Geosyst., 6, Q10001, doi: 10.1029/2004GC000893
5		2002	170.41	26.41	1		0.16	NW Pac		Brown et al., 2006. Dissolved and particulate Fe in the western and central North Pac.. Geochem, Geophys. Geosyst., 6, Q10001, doi: 10.1029/2004GC000893
5		2002	170.34	24.4	1		0.22	NW Pac		Brown et al., 2006. Dissolved and particulate Fe in the western and central North Pac.. Geochem, Geophys. Geosyst., 6, Q10001, doi: 10.1029/2004GC000893
5		2002	172.77	24.76	1		0.13	NW Pac		Brown et al., 2006. Dissolved and particulate Fe in the western and central North Pac.. Geochem, Geophys. Geosyst., 6, Q10001, doi: 10.1029/2004GC000893
5		2002	173.98	25.02	1		0.08	NW Pac		Brown et al., 2006. Dissolved and particulate Fe in the western and central North Pac.. Geochem, Geophys. Geosyst., 6, Q10001, doi: 10.1029/2004GC000893
5		2002	177.86	25.83	1		0.08	NW Pac		Brown et al., 2006. Dissolved and particulate Fe in the western and central North Pac.. Geochem, Geophys. Geosyst., 6, Q10001, doi: 10.1029/2004GC000893
5		2002	179.21	26.11	1		0.1	NW Pac		Brown et al., 2006. Dissolved and particulate Fe in the western and central North Pac.. Geochem, Geophys. Geosyst., 6, Q10001, doi: 10.1029/2004GC000893
5		2002	-179.4	26.4	1		0.07	NW Pac		Brown et al., 2006. Dissolved and particulate Fe in the western and central North Pac.. Geochem, Geophys. Geosyst., 6, Q10001, doi: 10.1029/2004GC000893
5		2002	-176.66	26.97	1		0.08	NW Pac		Brown et al., 2006. Dissolved and particulate Fe in the western and central North Pac.. Geochem, Geophys. Geosyst., 6, Q10001, doi: 10.1029/2004GC000893
5		2002	-175.3	26.18	1		0.06	NW Pac		Brown et al., 2006. Dissolved and particulate Fe in the western and central North Pac.. Geochem, Geophys. Geosyst., 6, Q10001, doi: 10.1029/2004GC000893
5		2002	-173.87	25.85	1		0.06	NW Pac		Brown et al., 2006. Dissolved and particulate Fe in the western and central North Pac.. Geochem, Geophys. Geosyst., 6, Q10001, doi: 10.1029/2004GC000893
5		2002	-172.52	25.66	1		0.04	NW Pac		Brown et al., 2006. Dissolved and particulate Fe in the western and central North Pac.. Geochem, Geophys. Geosyst., 6, Q10001, doi: 10.1029/2004GC000893
5		2002	-168.56	25.19	1		0.1	NW Pac		Brown et al., 2006. Dissolved and particulate Fe in the western and central North Pac.. Geochem, Geophys. Geosyst., 6, Q10001, doi: 10.1029/2004GC000893
5		2002	-167.8	24.82	1		0.16	NW Pac		Brown et al., 2006. Dissolved and particulate Fe in the western and central North Pac.. Geochem, Geophys. Geosyst., 6, Q10001, doi: 10.1029/2004GC000893
5		2002	-165.33	23.99	1		0.12	NW Pac		Brown et al., 2006. Dissolved and particulate Fe in the western and central North Pac.. Geochem, Geophys. Geosyst., 6, Q10001, doi: 10.1029/2004GC000893
5		2002	-164.37	23.62	1		0.18	NW Pac		Brown et al., 2006. Dissolved and particulate Fe in the western and central North Pac.. Geochem, Geophys. Geosyst., 6, Q10001, doi: 10.1029/2004GC000893
5		2002	-163.15	23.18	1		0.17	NW Pac		Brown et al., 2006. Dissolved and particulate Fe in the western and central North Pac.. Geochem, Geophys. Geosyst., 6, Q10001, doi: 10.1029/2004GC000893
5		2002	-160.68	22.42	1		0.45	NW Pac		Brown et al., 2006. Dissolved and particulate Fe in the western and central North Pac.. Geochem, Geophys. Geosyst., 6, Q10001, doi: 10.1029/2004GC000893
5		2002	-159.35	22.23	1		1.56	NW Pac		Brown et al., 2006. Dissolved and particulate Fe in the western and central North Pac.. Geochem, Geophys. Geosyst., 6, Q10001, doi: 10.1029/2004GC000893
5		2002	-158.23	22.68	1		0.38	NW Pac		Brown et al., 2006. Dissolved and particulate Fe in the western and central North Pac.. Geochem, Geophys. Geosyst., 6, Q10001, doi: 10.1029/2004GC000893
6		2002	-155.74	23.84	1		0.66	NW Pac		Brown et al., 2006. Dissolved and particulate Fe in the western and central North Pac.. Geochem, Geophys. Geosyst., 6, Q10001, doi: 10.1029/2004GC000893
6		2002	-154.61	24.39	1		0.55	NW Pac		Brown et al., 2006. Dissolved and particulate Fe in the western and central North Pac.. Geochem, Geophys. Geosyst., 6, Q10001, doi: 10.1029/2004GC000893
6		2002	-153.63	24.86	1		0.43	NW Pac		Brown et al., 2006. Dissolved and particulate Fe in the western and central North Pac.. Geochem, Geophys. Geosyst., 6, Q10001, doi: 10.1029/2004GC000893
6		2002	-151.15	26.03	1		0.47	NW Pac		Brown et al., 2006. Dissolved and particulate Fe in the western and central North Pac.. Geochem, Geophys. Geosyst., 6, Q10001, doi: 10.1029/2004GC000893
6		2002	-150.14	26.88	1		0.19	NW Pac		Brown et al., 2006. Dissolved and particulate Fe in the western and central North Pac.. Geochem, Geophys. Geosyst., 6, Q10001, doi: 10.1029/2004GC000893
6		2002	-150.14	27.73	1		0.16	NW Pac		Brown et al., 2006. Dissolved and particulate Fe in the western and central North Pac.. Geochem, Geophys. Geosyst., 6, Q10001, doi: 10.1029/2004GC000893
6		2002	-150.6	28.66	1		0.13	NW Pac		Brown et al., 2006. Dissolved and particulate Fe in the western and central North Pac.. Geochem, Geophys. Geosyst., 6, Q10001, doi: 10.1029/2004GC000893
6		2002	-151.3	27.69	1		0.15	NW Pac		Brown et al., 2006. Dissolved and particulate Fe in the western and central North Pac.. Geochem, Geophys. Geosyst., 6, Q10001, doi: 10.1029/2004GC000893
6		2002	-152.06	26.65	1		0.26	NW Pac		Brown et al., 2006. Dissolved and particulate Fe in the western and central North Pac.. Geochem, Geophys. Geosyst., 6, Q10001, doi: 10.1029/2004GC000893
6		2002	-153.56	24.56	1		0.36	NW Pac		Brown et al., 2006. Dissolved and particulate Fe in the western and central North Pac.. Geochem, Geophys. Geosyst., 6, Q10001, doi: 10.1029/2004GC000893
5		2002	146.99	34.47	15		0.24	NW Pac		Brown et al., 2006. Dissolved and particulate Fe in the western and central North Pac.. Geochem, Geophys. Geosyst., 6, Q10001, doi: 10.1029/2004GC000893
5		2002	146.99	34.47	40		0.19	NW Pac		Brown et al., 2006. Dissolved and particulate Fe in the western and central North Pac.. Geochem, Geophys. Geosyst., 6, Q10001, doi: 10.1029/2004GC000893
5		2002	146.99	34.47	100		0.28	NW Pac		Brown et al., 2006. Dissolved and particulate Fe in the western and central North Pac.. Geochem, Geophys. Geosyst., 6, Q10001, doi: 10.1029/2004GC000893
5		2002	146.99	34.47	200		0.45	NW Pac		Brown et al., 2006. Dissolved and particulate Fe in the western and central North Pac.. Geochem, Geophys. Geosyst., 6, Q10001, doi: 10.1029/2004GC000893
5		2002	146.99	34.47	300		0.48	NW Pac		Brown et al., 2006. Dissolved and particulate Fe in the western and central North Pac.. Geochem, Geophys. Geosyst., 6, Q10001, doi: 10.1029/2004GC000893
5		2002	146.99	34.47	455		0.6	NW Pac		Brown et al., 2006. Dissolved and particulate Fe in the western and central North Pac.. Geochem, Geophys. Geosyst., 6, Q10001, doi: 10.1029/2004GC000893
5		2002	146.99	34.47	527		0.68	NW Pac		Brown et al., 2006. Dissolved and particulate Fe in the western and central North Pac.. Geochem, Geophys. Geosyst., 6, Q10001, doi: 10.1029/2004GC000893
5		2002	146.99	34.47	959		0.9	NW Pac		Brown et al., 2006. Dissolved and particulate Fe in the western and central North Pac.. Geochem, Geophys. Geosyst., 6, Q10001, doi: 10.1029/2004GC000893
5		2002	146.99	34.47	1151		1.27	NW Pac		Brown et al., 2006. Dissolved and particulate Fe in the western and central North Pac.. Geochem, Geophys. Geosyst., 6, Q10001, doi: 10.1029/2004GC000893
5		2002	146.99	34.47	1342		1.08	NW Pac		Brown et al., 2006. Dissolved and particulate Fe in the western and central North Pac.. Geochem, Geophys. Geosyst., 6, Q10001, doi: 10.1029/2004GC000893
5		2002	155	44	60		0.27	NW Pac		Brown et al., 2006. Dissolved and particulate Fe in the western and central North Pac.. Geochem, Geophys. Geosyst., 6, Q10001, doi: 10.1029/2004GC000893
5		2002	155	44	100		0.41	NW Pac		Brown et al., 2006. Dissolved and particulate Fe in the western and central North Pac.. Geochem, Geophys. Geosyst., 6, Q10001, doi: 10.1029/2004GC000893
5		2002	155	44	150		0.55	NW Pac		Brown et al., 2006. Dissolved and particulate Fe in the western and central North Pac.. Geochem, Geophys. Geosyst., 6, Q10001, doi: 10.1029/2004GC000893
5		2002	155	44	230		1.02	NW Pac		Brown et al., 2006. Dissolved and particulate Fe in the western and central North Pac.. Geochem, Geophys. Geosyst., 6, Q10001, doi: 10.1029/2004GC000893
5		2002	155	44	300		1.52	NW Pac		Brown et al., 2006. Dissolved and particulate Fe in the western and central North Pac.. Geochem, Geophys. Geosyst., 6, Q10001, doi: 10.1029/2004GC000893
5		2002	155	44	600		1.52	NW Pac		Brown et al., 2006. Dissolved and particulate Fe in the western and central North Pac.. Geochem, Geophys. Geosyst., 6, Q10001, doi: 10.1029/2004GC000893
5		2002	155	44	1200		1.5	NW Pac		Brown et al., 2006. Dissolved and particulate Fe in the western and central North Pac.. Geochem, Geophys. Geosyst., 6, Q10001, doi: 10.1029/2004GC000893
5		2002	155	44	1500		1.26	NW Pac		Brown et al., 2006. Dissolved and particulate Fe in the western and central North Pac.. Geochem, Geophys. Geosyst., 6, Q10001, doi: 10.1029/2004GC000893
5		2002	155	44	2000		1.06	NW Pac		Brown et al., 2006. Dissolved and particulate Fe in the western and central North Pac.. Geochem, Geophys. Geosyst., 6, Q10001, doi: 10.1029/2004GC000893
5		2002	155	44	2525		0.96	NW Pac		Brown et al., 2006. Dissolved and particulate Fe in the western and central North Pac.. Geochem, Geophys. Geosyst., 6, Q10001, doi: 10.1029/2004GC000893
5		2002	155	44	4025		1.12	NW Pac		Brown et al., 2006. Dissolved and particulate Fe in the western and central North Pac.. Geochem, Geophys. Geosyst., 6, Q10001, doi: 10.1029/2004GC000893
5		2002	155	44	4525		0.79	NW Pac		Brown et al., 2006. Dissolved and particulate Fe in the western and central North Pac.. Geochem, Geophys. Geosyst., 6, Q10001, doi: 10.1029/2004GC000893
5		2002	155	44	5025		1	NW Pac		Brown et al., 2006. Dissolved and particulate Fe in the western and central North Pac.. Geochem, Geophys. Geosyst., 6, Q10001, doi: 10.1029/2004GC000893
5		2002	167.77	50	24		0.23	NW Pac		Brown et al., 2006. Dissolved and particulate Fe in the western and central North Pac.. Geochem, Geophys. Geosyst., 6, Q10001, doi: 10.1029/2004GC000893
5		2002	167.77	50	63		0.3	NW Pac		Brown et al., 2006. Dissolved and particulate Fe in the western and central North Pac.. Geochem, Geophys. Geosyst., 6, Q10001, doi: 10.1029/2004GC000893
5		2002	167.77	50	103		0.28	NW Pac		Brown et al., 2006. Dissolved and particulate Fe in the western and central North Pac.. Geochem, Geophys. Geosyst., 6, Q10001, doi: 10.1029/2004GC000893
5		2002	167.77	50	153		0.82	NW Pac		Brown et al., 2006. Dissolved and particulate Fe in the western and central North Pac.. Geochem, Geophys. Geosyst., 6, Q10001, doi: 10.1029/2004GC000893
5		2002	167.77	50	253		0.81	NW Pac		Brown et al., 2006. Dissolved and particulate Fe in the western and central North Pac.. Geochem, Geophys. Geosyst., 6, Q10001, doi: 10.1029/2004GC000893
5		2002	167.77	50	300		1.11	NW Pac		Brown et al., 2006. Dissolved and particulate Fe in the western and central North Pac.. Geochem, Geophys. Geosyst., 6, Q10001, doi: 10.1029/2004GC000893
5		2002	167.77	50	500		1.23	NW Pac		Brown et al., 2006. Dissolved and particulate Fe in the western and central North Pac.. Geochem, Geophys. Geosyst., 6, Q10001, doi: 10.1029/2004GC000893
5		2002	167.77	50	900		1.51	NW Pac		Brown et al., 2006. Dissolved and particulate Fe in the western and central North Pac.. Geochem, Geophys. Geosyst., 6, Q10001, doi: 10.1029/2004GC000893
5		2002	167.77	50	1200		1.38	NW Pac		Brown et al., 2006. Dissolved and particulate Fe in the western and central North Pac.. Geochem, Geophys. Geosyst., 6, Q10001, doi: 10.1029/2004GC000893
5		2002	167.77	50	1500		1.15	NW Pac		Brown et al., 2006. Dissolved and particulate Fe in the western and central North Pac.. Geochem, Geophys. Geosyst., 6, Q10001, doi: 10.1029/2004GC000893
5		2002	170.58	39.36	20		0.15	NW Pac		Brown et al., 2006. Dissolved and particulate Fe in the western and central North Pac.. Geochem, Geophys. Geosyst., 6, Q10001, doi: 10.1029/2004GC000893
5		2002	170.58	39.36	60		0.19	NW Pac		Brown et al., 2006. Dissolved and particulate Fe in the western and central North Pac.. Geochem, Geophys. Geosyst., 6, Q10001, doi: 10.1029/2004GC000893
5		2002	170.58	39.36	120		0.19	NW Pac		Brown et al., 2006. Dissolved and particulate Fe in the western and central North Pac.. Geochem, Geophys. Geosyst., 6, Q10001, doi: 10.1029/2004GC000893
5		2002	170.58	39.36	175		0.48	NW Pac		Brown et al., 2006. Dissolved and particulate Fe in the western and central North Pac.. Geochem, Geophys. Geosyst., 6, Q10001, doi: 10.1029/2004GC000893
5		2002	170.58	39.36	250		0.46	NW Pac		Brown et al., 2006. Dissolved and particulate Fe in the western and central North Pac.. Geochem, Geophys. Geosyst., 6, Q10001, doi: 10.1029/2004GC000893
5		2002	170.58	39.36	300		0.46	NW Pac		Brown et al., 2006. Dissolved and particulate Fe in the western and central North Pac.. Geochem, Geophys. Geosyst., 6, Q10001, doi: 10.1029/2004GC000893
5		2002	170.58	39.36	500		0.87	NW Pac		Brown et al., 2006. Dissolved and particulate Fe in the western and central North Pac.. Geochem, Geophys. Geosyst., 6, Q10001, doi: 10.1029/2004GC000893
5		2002	170.58	39.36	900		0.9	NW Pac		Brown et al., 2006. Dissolved and particulate Fe in the western and central North Pac.. Geochem, Geophys. Geosyst., 6, Q10001, doi: 10.1029/2004GC000893
5		2002	170.58	39.36	1200		0.91	NW Pac		Brown et al., 2006. Dissolved and particulate Fe in the western and central North Pac.. Geochem, Geophys. Geosyst., 6, Q10001, doi: 10.1029/2004GC000893
5		2002	170.58	39.36	1500		0.9	NW Pac		Brown et al., 2006. Dissolved and particulate Fe in the western and central North Pac.. Geochem, Geophys. Geosyst., 6, Q10001, doi: 10.1029/2004GC000893
5		2002	170.58	39.36	1500		0.92	NW Pac		Brown et al., 2006. Dissolved and particulate Fe in the western and central North Pac.. Geochem, Geophys. Geosyst., 6, Q10001, doi: 10.1029/2004GC000893
5		2002	170.58	33.77	20		0.21	NW Pac		Brown et al., 2006. Dissolved and particulate Fe in the western and central North Pac.. Geochem, Geophys. Geosyst., 6, Q10001, doi: 10.1029/2004GC000893
5		2002	170.58	33.77	60		0.13	NW Pac		Brown et al., 2006. Dissolved and particulate Fe in the western and central North Pac.. Geochem, Geophys. Geosyst., 6, Q10001, doi: 10.1029/2004GC000893
5		2002	170.58	33.77	60		0.12	NW Pac		Brown et al., 2006. Dissolved and particulate Fe in the western and central North Pac.. Geochem, Geophys. Geosyst., 6, Q10001, doi: 10.1029/2004GC000893
5		2002	170.58	33.77	80		0.17	NW Pac		Brown et al., 2006. Dissolved and particulate Fe in the western and central North Pac.. Geochem, Geophys. Geosyst., 6, Q10001, doi: 10.1029/2004GC000893
5		2002	170.58	33.77	120		0.18	NW Pac		Brown et al., 2006. Dissolved and particulate Fe in the western and central North Pac.. Geochem, Geophys. Geosyst., 6, Q10001, doi: 10.1029/2004GC000893
5		2002	170.58	33.77	175		0.22	NW Pac		Brown et al., 2006. Dissolved and particulate Fe in the western and central North Pac.. Geochem, Geophys. Geosyst., 6, Q10001, doi: 10.1029/2004GC000893
5		2002	170.58	33.77	250		0.38	NW Pac		Brown et al., 2006. Dissolved and particulate Fe in the western and central North Pac.. Geochem, Geophys. Geosyst., 6, Q10001, doi: 10.1029/2004GC000893
5		2002	170.58	33.77	300		0.36	NW Pac		Brown et al., 2006. Dissolved and particulate Fe in the western and central North Pac.. Geochem, Geophys. Geosyst., 6, Q10001, doi: 10.1029/2004GC000893
5		2002	170.58	33.77	500		0.4	NW Pac		Brown et al., 2006. Dissolved and particulate Fe in the western and central North Pac.. Geochem, Geophys. Geosyst., 6, Q10001, doi: 10.1029/2004GC000893
5		2002	170.58	33.77	900		0.72	NW Pac		Brown et al., 2006. Dissolved and particulate Fe in the western and central North Pac.. Geochem, Geophys. Geosyst., 6, Q10001, doi: 10.1029/2004GC000893
5		2002	170.58	33.77	1200		1.02	NW Pac		Brown et al., 2006. Dissolved and particulate Fe in the western and central North Pac.. Geochem, Geophys. Geosyst., 6, Q10001, doi: 10.1029/2004GC000893
5		2002	170.58	33.77	1500		0.87	NW Pac		Brown et al., 2006. Dissolved and particulate Fe in the western and central North Pac.. Geochem, Geophys. Geosyst., 6, Q10001, doi: 10.1029/2004GC000893
5		2002	170.58	30.5	20		0.15	NW Pac		Brown et al., 2006. Dissolved and particulate Fe in the western and central North Pac.. Geochem, Geophys. Geosyst., 6, Q10001, doi: 10.1029/2004GC000893
5		2002	170.58	30.5	60		0.19	NW Pac		Brown et al., 2006. Dissolved and particulate Fe in the western and central North Pac.. Geochem, Geophys. Geosyst., 6, Q10001, doi: 10.1029/2004GC000893
5		2002	170.58	30.5	100		0.13	NW Pac		Brown et al., 2006. Dissolved and particulate Fe in the western and central North Pac.. Geochem, Geophys. Geosyst., 6, Q10001, doi: 10.1029/2004GC000893
5		2002	170.58	30.5	50		0.28	NW Pac		Brown et al., 2006. Dissolved and particulate Fe in the western and central North Pac.. Geochem, Geophys. Geosyst., 6, Q10001, doi: 10.1029/2004GC000893
5		2002	170.58	30.5	200		0.25	NW Pac		Brown et al., 2006. Dissolved and particulate Fe in the western and central North Pac.. Geochem, Geophys. Geosyst., 6, Q10001, doi: 10.1029/2004GC000893
5		2002	170.58	30.5	250		0.27	NW Pac		Brown et al., 2006. Dissolved and particulate Fe in the western and central North Pac.. Geochem, Geophys. Geosyst., 6, Q10001, doi: 10.1029/2004GC000893
5		2002	170.58	30.5	300		0.24	NW Pac		Brown et al., 2006. Dissolved and particulate Fe in the western and central North Pac.. Geochem, Geophys. Geosyst., 6, Q10001, doi: 10.1029/2004GC000893
5		2002	170.58	30.5	500		0.45	NW Pac		Brown et al., 2006. Dissolved and particulate Fe in the western and central North Pac.. Geochem, Geophys. Geosyst., 6, Q10001, doi: 10.1029/2004GC000893
5		2002	170.58	30.5	650		0.48	NW Pac		Brown et al., 2006. Dissolved and particulate Fe in the western and central North Pac.. Geochem, Geophys. Geosyst., 6, Q10001, doi: 10.1029/2004GC000893
5		2002	170.58	30.5	900		0.78	NW Pac		Brown et al., 2006. Dissolved and particulate Fe in the western and central North Pac.. Geochem, Geophys. Geosyst., 6, Q10001, doi: 10.1029/2004GC000893
5		2002	170.58	30.5	1200		0.92	NW Pac		Brown et al., 2006. Dissolved and particulate Fe in the western and central North Pac.. Geochem, Geophys. Geosyst., 6, Q10001, doi: 10.1029/2004GC000893
5		2002	170.58	30.5	1500		0.73	NW Pac		Brown et al., 2006. Dissolved and particulate Fe in the western and central North Pac.. Geochem, Geophys. Geosyst., 6, Q10001, doi: 10.1029/2004GC000893
5		2002	170.33	24.25	20		0.23	NW Pac		Brown et al., 2006. Dissolved and particulate Fe in the western and central North Pac.. Geochem, Geophys. Geosyst., 6, Q10001, doi: 10.1029/2004GC000893
5		2002	170.33	24.25	60		0.25	NW Pac		Brown et al., 2006. Dissolved and particulate Fe in the western and central North Pac.. Geochem, Geophys. Geosyst., 6, Q10001, doi: 10.1029/2004GC000893
5		2002	170.33	24.25	100		0.21	NW Pac		Brown et al., 2006. Dissolved and particulate Fe in the western and central North Pac.. Geochem, Geophys. Geosyst., 6, Q10001, doi: 10.1029/2004GC000893
5		2002	170.33	24.25	150		0.19	NW Pac		Brown et al., 2006. Dissolved and particulate Fe in the western and central North Pac.. Geochem, Geophys. Geosyst., 6, Q10001, doi: 10.1029/2004GC000893
5		2002	170.33	24.25	200		0.26	NW Pac		Brown et al., 2006. Dissolved and particulate Fe in the western and central North Pac.. Geochem, Geophys. Geosyst., 6, Q10001, doi: 10.1029/2004GC000893
5		2002	170.33	24.25	250		0.32	NW Pac		Brown et al., 2006. Dissolved and particulate Fe in the western and central North Pac.. Geochem, Geophys. Geosyst., 6, Q10001, doi: 10.1029/2004GC000893
5		2002	170.33	24.25	300		0.5	NW Pac		Brown et al., 2006. Dissolved and particulate Fe in the western and central North Pac.. Geochem, Geophys. Geosyst., 6, Q10001, doi: 10.1029/2004GC000893
5		2002	170.33	24.25	1000		0.79	NW Pac		Brown et al., 2006. Dissolved and particulate Fe in the western and central North Pac.. Geochem, Geophys. Geosyst., 6, Q10001, doi: 10.1029/2004GC000893
5		2002	170.33	24.25	1200		0.71	NW Pac		Brown et al., 2006. Dissolved and particulate Fe in the western and central North Pac.. Geochem, Geophys. Geosyst., 6, Q10001, doi: 10.1029/2004GC000893
5		2002	170.33	24.25	1500		0.76	NW Pac		Brown et al., 2006. Dissolved and particulate Fe in the western and central North Pac.. Geochem, Geophys. Geosyst., 6, Q10001, doi: 10.1029/2004GC000893
5		2002	170.33	24.25	2500		0.61	NW Pac		Brown et al., 2006. Dissolved and particulate Fe in the western and central North Pac.. Geochem, Geophys. Geosyst., 6, Q10001, doi: 10.1029/2004GC000893
5		2002	170.33	24.25	3000		0.84	NW Pac		Brown et al., 2006. Dissolved and particulate Fe in the western and central North Pac.. Geochem, Geophys. Geosyst., 6, Q10001, doi: 10.1029/2004GC000893
5		2002	170.33	24.25	4000		0.9	NW Pac		Brown et al., 2006. Dissolved and particulate Fe in the western and central North Pac.. Geochem, Geophys. Geosyst., 6, Q10001, doi: 10.1029/2004GC000893
5		2002	170.33	24.25	4500		0.69	NW Pac		Brown et al., 2006. Dissolved and particulate Fe in the western and central North Pac.. Geochem, Geophys. Geosyst., 6, Q10001, doi: 10.1029/2004GC000893
5		2002	170.33	24.25	5400		0.45	NW Pac		Brown et al., 2006. Dissolved and particulate Fe in the western and central North Pac.. Geochem, Geophys. Geosyst., 6, Q10001, doi: 10.1029/2004GC000893
5		2002	-175	26	20		0.16	NW Pac		Brown et al., 2006. Dissolved and particulate Fe in the western and central North Pac.. Geochem, Geophys. Geosyst., 6, Q10001, doi: 10.1029/2004GC000893
5		2002	-175	26	40		0.17	NW Pac		Brown et al., 2006. Dissolved and particulate Fe in the western and central North Pac.. Geochem, Geophys. Geosyst., 6, Q10001, doi: 10.1029/2004GC000893
5		2002	-175	26	80		0.14	NW Pac		Brown et al., 2006. Dissolved and particulate Fe in the western and central North Pac.. Geochem, Geophys. Geosyst., 6, Q10001, doi: 10.1029/2004GC000893
5		2002	-175	26	100		0.25	NW Pac		Brown et al., 2006. Dissolved and particulate Fe in the western and central North Pac.. Geochem, Geophys. Geosyst., 6, Q10001, doi: 10.1029/2004GC000893
5		2002	-175	26	170		0.26	NW Pac		Brown et al., 2006. Dissolved and particulate Fe in the western and central North Pac.. Geochem, Geophys. Geosyst., 6, Q10001, doi: 10.1029/2004GC000893
5		2002	-175	26	250		0.31	NW Pac		Brown et al., 2006. Dissolved and particulate Fe in the western and central North Pac.. Geochem, Geophys. Geosyst., 6, Q10001, doi: 10.1029/2004GC000893
5		2002	-175	26	300		0.33	NW Pac		Brown et al., 2006. Dissolved and particulate Fe in the western and central North Pac.. Geochem, Geophys. Geosyst., 6, Q10001, doi: 10.1029/2004GC000893
5		2002	-175	26	500		0.35	NW Pac		Brown et al., 2006. Dissolved and particulate Fe in the western and central North Pac.. Geochem, Geophys. Geosyst., 6, Q10001, doi: 10.1029/2004GC000893
5		2002	-175	26	700		0.74	NW Pac		Brown et al., 2006. Dissolved and particulate Fe in the western and central North Pac.. Geochem, Geophys. Geosyst., 6, Q10001, doi: 10.1029/2004GC000893
5		2002	-175	26	900		0.7	NW Pac		Brown et al., 2006. Dissolved and particulate Fe in the western and central North Pac.. Geochem, Geophys. Geosyst., 6, Q10001, doi: 10.1029/2004GC000893
5		2002	-175	26	1200		0.63	NW Pac		Brown et al., 2006. Dissolved and particulate Fe in the western and central North Pac.. Geochem, Geophys. Geosyst., 6, Q10001, doi: 10.1029/2004GC000893
5		2002	-175	26	1500		0.92	NW Pac		Brown et al., 2006. Dissolved and particulate Fe in the western and central North Pac.. Geochem, Geophys. Geosyst., 6, Q10001, doi: 10.1029/2004GC000893
5		2002	-158	22.75	20		0.45	NW Pac		Brown et al., 2006. Dissolved and particulate Fe in the western and central North Pac.. Geochem, Geophys. Geosyst., 6, Q10001, doi: 10.1029/2004GC000893
5		2002	-158	22.75	60		0.22	NW Pac		Brown et al., 2006. Dissolved and particulate Fe in the western and central North Pac.. Geochem, Geophys. Geosyst., 6, Q10001, doi: 10.1029/2004GC000893
5		2002	-158	22.75	80		0.31	NW Pac		Brown et al., 2006. Dissolved and particulate Fe in the western and central North Pac.. Geochem, Geophys. Geosyst., 6, Q10001, doi: 10.1029/2004GC000893
5		2002	-158	22.75	100		0.42	NW Pac		Brown et al., 2006. Dissolved and particulate Fe in the western and central North Pac.. Geochem, Geophys. Geosyst., 6, Q10001, doi: 10.1029/2004GC000893
5		2002	-158	22.75	150		0.31	NW Pac		Brown et al., 2006. Dissolved and particulate Fe in the western and central North Pac.. Geochem, Geophys. Geosyst., 6, Q10001, doi: 10.1029/2004GC000893
5		2002	-158	22.75	200		0.46	NW Pac		Brown et al., 2006. Dissolved and particulate Fe in the western and central North Pac.. Geochem, Geophys. Geosyst., 6, Q10001, doi: 10.1029/2004GC000893
5		2002	-158	22.75	300		0.42	NW Pac		Brown et al., 2006. Dissolved and particulate Fe in the western and central North Pac.. Geochem, Geophys. Geosyst., 6, Q10001, doi: 10.1029/2004GC000893
5		2002	-158	22.75	500		0.5	NW Pac		Brown et al., 2006. Dissolved and particulate Fe in the western and central North Pac.. Geochem, Geophys. Geosyst., 6, Q10001, doi: 10.1029/2004GC000893
5		2002	-158	22.75	775		0.69	NW Pac		Brown et al., 2006. Dissolved and particulate Fe in the western and central North Pac.. Geochem, Geophys. Geosyst., 6, Q10001, doi: 10.1029/2004GC000893
5		2002	-158	22.75	950		0.68	NW Pac		Brown et al., 2006. Dissolved and particulate Fe in the western and central North Pac.. Geochem, Geophys. Geosyst., 6, Q10001, doi: 10.1029/2004GC000893
5		2002	-158	22.75	1750		0.78	NW Pac		Brown et al., 2006. Dissolved and particulate Fe in the western and central North Pac.. Geochem, Geophys. Geosyst., 6, Q10001, doi: 10.1029/2004GC000893
5		2002	-158	22.75	1750		0.76	NW Pac		Brown et al., 2006. Dissolved and particulate Fe in the western and central North Pac.. Geochem, Geophys. Geosyst., 6, Q10001, doi: 10.1029/2004GC000893
5		2002	-158	22.75	2500		0.5	NW Pac		Brown et al., 2006. Dissolved and particulate Fe in the western and central North Pac.. Geochem, Geophys. Geosyst., 6, Q10001, doi: 10.1029/2004GC000893
5		2002	-158	22.75	3000		0.55	NW Pac		Brown et al., 2006. Dissolved and particulate Fe in the western and central North Pac.. Geochem, Geophys. Geosyst., 6, Q10001, doi: 10.1029/2004GC000893
5		2002	-158	22.75	3508		0.48	NW Pac		Brown et al., 2006. Dissolved and particulate Fe in the western and central North Pac.. Geochem, Geophys. Geosyst., 6, Q10001, doi: 10.1029/2004GC000893
5		2002	-158	22.75	4000		0.7	NW Pac		Brown et al., 2006. Dissolved and particulate Fe in the western and central North Pac.. Geochem, Geophys. Geosyst., 6, Q10001, doi: 10.1029/2004GC000893
5		2002	-158	22.75	4500		0.46	NW Pac		Brown et al., 2006. Dissolved and particulate Fe in the western and central North Pac.. Geochem, Geophys. Geosyst., 6, Q10001, doi: 10.1029/2004GC000893
5		2002	-158	22.75	4500		0.6	NW Pac		Brown et al., 2006. Dissolved and particulate Fe in the western and central North Pac.. Geochem, Geophys. Geosyst., 6, Q10001, doi: 10.1029/2004GC000893
7		1983	-155	28	17	0.369	0.377856	VERTEX-IV		Bruland, K., Orians, K. And Cowen, P. ,1994. Reactive trace metals in the stratified central North Pacific. Geochem. Cosmochim. Acta. 58, 3171-3182.
7		1983	-155	28	39	0.17	0.17408	VERTEX-IV		Bruland, K., Orians, K. And Cowen, P. ,1994. Reactive trace metals in the stratified central North Pacific. Geochem. Cosmochim. Acta. 58, 3171-3182.
7		1983	-155	28	47	0.189	0.193536	VERTEX-IV		Bruland, K., Orians, K. And Cowen, P. ,1994. Reactive trace metals in the stratified central North Pacific. Geochem. Cosmochim. Acta. 58, 3171-3182.
7		1983	-155	28	60	0.051	0.052224	VERTEX-IV		Bruland, K., Orians, K. And Cowen, P. ,1994. Reactive trace metals in the stratified central North Pacific. Geochem. Cosmochim. Acta. 58, 3171-3182.
7		1983	-155	28	69	0.021	0.021504	VERTEX-IV		Bruland, K., Orians, K. And Cowen, P. ,1994. Reactive trace metals in the stratified central North Pacific. Geochem. Cosmochim. Acta. 58, 3171-3182.
7		1983	-155	28	99	0.021	0.021504	VERTEX-IV		Bruland, K., Orians, K. And Cowen, P. ,1994. Reactive trace metals in the stratified central North Pacific. Geochem. Cosmochim. Acta. 58, 3171-3182.
7		1983	-155	28	150	0.051	0.052224	VERTEX-IV		Bruland, K., Orians, K. And Cowen, P. ,1994. Reactive trace metals in the stratified central North Pacific. Geochem. Cosmochim. Acta. 58, 3171-3182.
7		1983	-155	28	176	0.057	0.058368	VERTEX-IV		Bruland, K., Orians, K. And Cowen, P. ,1994. Reactive trace metals in the stratified central North Pacific. Geochem. Cosmochim. Acta. 58, 3171-3182.
7		1983	-155	28	197	0.13	0.13312	VERTEX-IV		Bruland, K., Orians, K. And Cowen, P. ,1994. Reactive trace metals in the stratified central North Pacific. Geochem. Cosmochim. Acta. 58, 3171-3182.
7		1983	-155	28	296	0.159	0.162816	VERTEX-IV		Bruland, K., Orians, K. And Cowen, P. ,1994. Reactive trace metals in the stratified central North Pacific. Geochem. Cosmochim. Acta. 58, 3171-3182.
7		1983	-155	28	399	0.209	0.214016	VERTEX-IV		Bruland, K., Orians, K. And Cowen, P. ,1994. Reactive trace metals in the stratified central North Pacific. Geochem. Cosmochim. Acta. 58, 3171-3182.
7		1983	-155	28	498	0.219	0.224256	VERTEX-IV		Bruland, K., Orians, K. And Cowen, P. ,1994. Reactive trace metals in the stratified central North Pacific. Geochem. Cosmochim. Acta. 58, 3171-3182.
7		1983	-155	28	601	0.259	0.265216	VERTEX-IV		Bruland, K., Orians, K. And Cowen, P. ,1994. Reactive trace metals in the stratified central North Pacific. Geochem. Cosmochim. Acta. 58, 3171-3182.
7		1983	-155	28	747	0.369	0.377856	VERTEX-IV		Bruland, K., Orians, K. And Cowen, P. ,1994. Reactive trace metals in the stratified central North Pacific. Geochem. Cosmochim. Acta. 58, 3171-3182.
7		1983	-155	28	893	0.418	0.428032	VERTEX-IV		Bruland, K., Orians, K. And Cowen, P. ,1994. Reactive trace metals in the stratified central North Pacific. Geochem. Cosmochim. Acta. 58, 3171-3182.
7		1983	-155	28	1058	0.4	0.4096	VERTEX-IV		Bruland, K., Orians, K. And Cowen, P. ,1994. Reactive trace metals in the stratified central North Pacific. Geochem. Cosmochim. Acta. 58, 3171-3182.
7		1983	-155	28	1270	0.459	0.470016	VERTEX-IV		Bruland, K., Orians, K. And Cowen, P. ,1994. Reactive trace metals in the stratified central North Pacific. Geochem. Cosmochim. Acta. 58, 3171-3182.
7		1983	-155	28	1483	0.409	0.418816	VERTEX-IV		Bruland, K., Orians, K. And Cowen, P. ,1994. Reactive trace metals in the stratified central North Pacific. Geochem. Cosmochim. Acta. 58, 3171-3182.
7		1983	-155	28	1734	0.359	0.367616	VERTEX-IV		Bruland, K., Orians, K. And Cowen, P. ,1994. Reactive trace metals in the stratified central North Pacific. Geochem. Cosmochim. Acta. 58, 3171-3182.
7		1983	-155	28	1966	0.4	0.4096	VERTEX-IV		Bruland, K., Orians, K. And Cowen, P. ,1994. Reactive trace metals in the stratified central North Pacific. Geochem. Cosmochim. Acta. 58, 3171-3182.
7		1983	-155	28	2989	0.369	0.377856	VERTEX-IV		Bruland, K., Orians, K. And Cowen, P. ,1994. Reactive trace metals in the stratified central North Pacific. Geochem. Cosmochim. Acta. 58, 3171-3182.
7		1983	-155	28	3491	0.431	0.441344	VERTEX-IV		Bruland, K., Orians, K. And Cowen, P. ,1994. Reactive trace metals in the stratified central North Pacific. Geochem. Cosmochim. Acta. 58, 3171-3182.
7		1983	-155	28	3974	0.4	0.4096	VERTEX-IV		Bruland, K., Orians, K. And Cowen, P. ,1994. Reactive trace metals in the stratified central North Pacific. Geochem. Cosmochim. Acta. 58, 3171-3182.
7		1983	-155	28	4496	0.31	0.31744	VERTEX-IV		Bruland, K., Orians, K. And Cowen, P. ,1994. Reactive trace metals in the stratified central North Pacific. Geochem. Cosmochim. Acta. 58, 3171-3182.
7		1983	-155	28	4998	0.352	0.360448	VERTEX-IV		Bruland, K., Orians, K. And Cowen, P. ,1994. Reactive trace metals in the stratified central North Pacific. Geochem. Cosmochim. Acta. 58, 3171-3182.
7		1983	-155	28	5249	0.331	0.338944	VERTEX-IV		Bruland, K., Orians, K. And Cowen, P. ,1994. Reactive trace metals in the stratified central North Pacific. Geochem. Cosmochim. Acta. 58, 3171-3182.
9		2000	-79.041	-8.346	2		6	SE Pacific		Bruland, KW, Rue, EL, Smith, GJ, DiTullio, GR, 2005. Iron, macronutrients and diatom blooms in teh Peru upwelling regime: brown and blue waters of Peru. Mar. Chem., 93: 81-103.
9		2000	-79.038	-8.34784	2		9.6	SE Pacific		Bruland, KW, Rue, EL, Smith, GJ, DiTullio, GR, 2005. Iron, macronutrients and diatom blooms in teh Peru upwelling regime: brown and blue waters of Peru. Mar. Chem., 93: 81-103.
9		2000	-79.0087	-8.37983	2		7.5	SE Pacific		Bruland, KW, Rue, EL, Smith, GJ, DiTullio, GR, 2005. Iron, macronutrients and diatom blooms in teh Peru upwelling regime: brown and blue waters of Peru. Mar. Chem., 93: 81-103.
9		2000	-79.0116	-8.3818	2		11.5	SE Pacific		Bruland, KW, Rue, EL, Smith, GJ, DiTullio, GR, 2005. Iron, macronutrients and diatom blooms in teh Peru upwelling regime: brown and blue waters of Peru. Mar. Chem., 93: 81-103.
9		2000	-79.0586	-8.40637	2		15.5	SE Pacific		Bruland, KW, Rue, EL, Smith, GJ, DiTullio, GR, 2005. Iron, macronutrients and diatom blooms in teh Peru upwelling regime: brown and blue waters of Peru. Mar. Chem., 93: 81-103.
9		2000	-79.0685	-8.41167	2		7.8	SE Pacific		Bruland, KW, Rue, EL, Smith, GJ, DiTullio, GR, 2005. Iron, macronutrients and diatom blooms in teh Peru upwelling regime: brown and blue waters of Peru. Mar. Chem., 93: 81-103.
9		2000	-79.166	-8.46382	2		2.8	SE Pacific		Bruland, KW, Rue, EL, Smith, GJ, DiTullio, GR, 2005. Iron, macronutrients and diatom blooms in teh Peru upwelling regime: brown and blue waters of Peru. Mar. Chem., 93: 81-103.
9		2000	-79.2694	-8.51913	2		2.5	SE Pacific		Bruland, KW, Rue, EL, Smith, GJ, DiTullio, GR, 2005. Iron, macronutrients and diatom blooms in teh Peru upwelling regime: brown and blue waters of Peru. Mar. Chem., 93: 81-103.
9		2000	-79.2854	-8.52764	2		3	SE Pacific		Bruland, KW, Rue, EL, Smith, GJ, DiTullio, GR, 2005. Iron, macronutrients and diatom blooms in teh Peru upwelling regime: brown and blue waters of Peru. Mar. Chem., 93: 81-103.
9		2000	-79.383	-8.57986	2		1	SE Pacific		Bruland, KW, Rue, EL, Smith, GJ, DiTullio, GR, 2005. Iron, macronutrients and diatom blooms in teh Peru upwelling regime: brown and blue waters of Peru. Mar. Chem., 93: 81-103.
9		2000	-79.4978	-8.64126	2		0.7	SE Pacific		Bruland, KW, Rue, EL, Smith, GJ, DiTullio, GR, 2005. Iron, macronutrients and diatom blooms in teh Peru upwelling regime: brown and blue waters of Peru. Mar. Chem., 93: 81-103.
9		2000	-79.6189	-8.70601	2		0.8	SE Pacific		Bruland, KW, Rue, EL, Smith, GJ, DiTullio, GR, 2005. Iron, macronutrients and diatom blooms in teh Peru upwelling regime: brown and blue waters of Peru. Mar. Chem., 93: 81-103.
9		2000	-79.7401	-8.77079	2		0.58	SE Pacific		Bruland, KW, Rue, EL, Smith, GJ, DiTullio, GR, 2005. Iron, macronutrients and diatom blooms in teh Peru upwelling regime: brown and blue waters of Peru. Mar. Chem., 93: 81-103.
9		2000	-79.8481	-8.82848	2		0.45	SE Pacific		Bruland, KW, Rue, EL, Smith, GJ, DiTullio, GR, 2005. Iron, macronutrients and diatom blooms in teh Peru upwelling regime: brown and blue waters of Peru. Mar. Chem., 93: 81-103.
9		2000	-79.9429	-8.87914	2		0.4	SE Pacific		Bruland, KW, Rue, EL, Smith, GJ, DiTullio, GR, 2005. Iron, macronutrients and diatom blooms in teh Peru upwelling regime: brown and blue waters of Peru. Mar. Chem., 93: 81-103.
9		2000	-79.9457	-8.8806	2		0.34	SE Pacific		Bruland, KW, Rue, EL, Smith, GJ, DiTullio, GR, 2005. Iron, macronutrients and diatom blooms in teh Peru upwelling regime: brown and blue waters of Peru. Mar. Chem., 93: 81-103.
9		2000	-80.0267	-8.92394	2		0.18	SE Pacific		Bruland, KW, Rue, EL, Smith, GJ, DiTullio, GR, 2005. Iron, macronutrients and diatom blooms in teh Peru upwelling regime: brown and blue waters of Peru. Mar. Chem., 93: 81-103.
9		2000	-80.0538	-8.93843	2		0.27	SE Pacific		Bruland, KW, Rue, EL, Smith, GJ, DiTullio, GR, 2005. Iron, macronutrients and diatom blooms in teh Peru upwelling regime: brown and blue waters of Peru. Mar. Chem., 93: 81-103.
9		2000	-80.1101	-8.97272	2		0.08	SE Pacific		Bruland, KW, Rue, EL, Smith, GJ, DiTullio, GR, 2005. Iron, macronutrients and diatom blooms in teh Peru upwelling regime: brown and blue waters of Peru. Mar. Chem., 93: 81-103.
9		2000	-80.1933	-9.01291	2		0.05	SE Pacific		Bruland, KW, Rue, EL, Smith, GJ, DiTullio, GR, 2005. Iron, macronutrients and diatom blooms in teh Peru upwelling regime: brown and blue waters of Peru. Mar. Chem., 93: 81-103.
9		2000	-80.2559	-9.0464	2		0.56	SE Pacific		Bruland, KW, Rue, EL, Smith, GJ, DiTullio, GR, 2005. Iron, macronutrients and diatom blooms in teh Peru upwelling regime: brown and blue waters of Peru. Mar. Chem., 93: 81-103.
9		2000	-80.3783	-9.11171	2		1	SE Pacific		Bruland, KW, Rue, EL, Smith, GJ, DiTullio, GR, 2005. Iron, macronutrients and diatom blooms in teh Peru upwelling regime: brown and blue waters of Peru. Mar. Chem., 93: 81-103.
9		2000	-80.4702	-9.16083	2		0.35	SE Pacific		Bruland, KW, Rue, EL, Smith, GJ, DiTullio, GR, 2005. Iron, macronutrients and diatom blooms in teh Peru upwelling regime: brown and blue waters of Peru. Mar. Chem., 93: 81-103.
9		2000	-80.6715	-9.26824	2		0.12	SE Pacific		Bruland, KW, Rue, EL, Smith, GJ, DiTullio, GR, 2005. Iron, macronutrients and diatom blooms in teh Peru upwelling regime: brown and blue waters of Peru. Mar. Chem., 93: 81-103.
9		2000	-80.6745	-9.26988	2		0.16	SE Pacific		Bruland, KW, Rue, EL, Smith, GJ, DiTullio, GR, 2005. Iron, macronutrients and diatom blooms in teh Peru upwelling regime: brown and blue waters of Peru. Mar. Chem., 93: 81-103.
9		2000	-80.7485	-9.30934	2		0.1	SE Pacific		Bruland, KW, Rue, EL, Smith, GJ, DiTullio, GR, 2005. Iron, macronutrients and diatom blooms in teh Peru upwelling regime: brown and blue waters of Peru. Mar. Chem., 93: 81-103.
9		2000	-80.7516	-9.311	2		0.31	SE Pacific		Bruland, KW, Rue, EL, Smith, GJ, DiTullio, GR, 2005. Iron, macronutrients and diatom blooms in teh Peru upwelling regime: brown and blue waters of Peru. Mar. Chem., 93: 81-103.
9		2000	-80.8403	-9.35838	2		0.15	SE Pacific		Bruland, KW, Rue, EL, Smith, GJ, DiTullio, GR, 2005. Iron, macronutrients and diatom blooms in teh Peru upwelling regime: brown and blue waters of Peru. Mar. Chem., 93: 81-103.
9		2000	-80.9451	-9.41429	2		0.094	SE Pacific		Bruland, KW, Rue, EL, Smith, GJ, DiTullio, GR, 2005. Iron, macronutrients and diatom blooms in teh Peru upwelling regime: brown and blue waters of Peru. Mar. Chem., 93: 81-103.
9		2000	-80.9547	-9.41939	2		0.28	SE Pacific		Bruland, KW, Rue, EL, Smith, GJ, DiTullio, GR, 2005. Iron, macronutrients and diatom blooms in teh Peru upwelling regime: brown and blue waters of Peru. Mar. Chem., 93: 81-103.
9		2000	-81.0324	-9.46092	2		0.18	SE Pacific		Bruland, KW, Rue, EL, Smith, GJ, DiTullio, GR, 2005. Iron, macronutrients and diatom blooms in teh Peru upwelling regime: brown and blue waters of Peru. Mar. Chem., 93: 81-103.
9		2000	-81.1231	-9.50924	2		0.13	SE Pacific		Bruland, KW, Rue, EL, Smith, GJ, DiTullio, GR, 2005. Iron, macronutrients and diatom blooms in teh Peru upwelling regime: brown and blue waters of Peru. Mar. Chem., 93: 81-103.
9		2000	-81.1293	-9.51258	2		0.2	SE Pacific		Bruland, KW, Rue, EL, Smith, GJ, DiTullio, GR, 2005. Iron, macronutrients and diatom blooms in teh Peru upwelling regime: brown and blue waters of Peru. Mar. Chem., 93: 81-103.
9		2000	-81.2154	-9.55848	2		0.2	SE Pacific		Bruland, KW, Rue, EL, Smith, GJ, DiTullio, GR, 2005. Iron, macronutrients and diatom blooms in teh Peru upwelling regime: brown and blue waters of Peru. Mar. Chem., 93: 81-103.
9		2000	-81.2186	-9.56022	2		0.19	SE Pacific		Bruland, KW, Rue, EL, Smith, GJ, DiTullio, GR, 2005. Iron, macronutrients and diatom blooms in teh Peru upwelling regime: brown and blue waters of Peru. Mar. Chem., 93: 81-103.
9		2000	-81.3102	-9.609	2		0.08	SE Pacific		Bruland, KW, Rue, EL, Smith, GJ, DiTullio, GR, 2005. Iron, macronutrients and diatom blooms in teh Peru upwelling regime: brown and blue waters of Peru. Mar. Chem., 93: 81-103.
9		2000	-81.3132	-9.6106	2		0.17	SE Pacific		Bruland, KW, Rue, EL, Smith, GJ, DiTullio, GR, 2005. Iron, macronutrients and diatom blooms in teh Peru upwelling regime: brown and blue waters of Peru. Mar. Chem., 93: 81-103.
9		2000	-81.3993	-9.65648	2		0.1	SE Pacific		Bruland, KW, Rue, EL, Smith, GJ, DiTullio, GR, 2005. Iron, macronutrients and diatom blooms in teh Peru upwelling regime: brown and blue waters of Peru. Mar. Chem., 93: 81-103.
9		2000	-81.4052	-9.6597	2		0.15	SE Pacific		Bruland, KW, Rue, EL, Smith, GJ, DiTullio, GR, 2005. Iron, macronutrients and diatom blooms in teh Peru upwelling regime: brown and blue waters of Peru. Mar. Chem., 93: 81-103.
9		2000	-81.4921	-9.70597	2		0.08	SE Pacific		Bruland, KW, Rue, EL, Smith, GJ, DiTullio, GR, 2005. Iron, macronutrients and diatom blooms in teh Peru upwelling regime: brown and blue waters of Peru. Mar. Chem., 93: 81-103.
9		2000	-81.4952	-9.70766	2		0.07	SE Pacific		Bruland, KW, Rue, EL, Smith, GJ, DiTullio, GR, 2005. Iron, macronutrients and diatom blooms in teh Peru upwelling regime: brown and blue waters of Peru. Mar. Chem., 93: 81-103.
9		2000	-81.5824	-9.75408	2		0.08	SE Pacific		Bruland, KW, Rue, EL, Smith, GJ, DiTullio, GR, 2005. Iron, macronutrients and diatom blooms in teh Peru upwelling regime: brown and blue waters of Peru. Mar. Chem., 93: 81-103.
9		2000	-81.5945	-9.76056	2		0.097	SE Pacific		Bruland, KW, Rue, EL, Smith, GJ, DiTullio, GR, 2005. Iron, macronutrients and diatom blooms in teh Peru upwelling regime: brown and blue waters of Peru. Mar. Chem., 93: 81-103.
9		2000	-88.6242	-1.56345	2		0.09	SE Pacific		Bruland, KW, Rue, EL, Smith, GJ, DiTullio, GR, 2005. Iron, macronutrients and diatom blooms in teh Peru upwelling regime: brown and blue waters of Peru. Mar. Chem., 93: 81-103.
9		2000	-88.4467	-1.68205	2		0.05	SE Pacific		Bruland, KW, Rue, EL, Smith, GJ, DiTullio, GR, 2005. Iron, macronutrients and diatom blooms in teh Peru upwelling regime: brown and blue waters of Peru. Mar. Chem., 93: 81-103.
9		2000	-88.355	-1.74152	2		0.05	SE Pacific		Bruland, KW, Rue, EL, Smith, GJ, DiTullio, GR, 2005. Iron, macronutrients and diatom blooms in teh Peru upwelling regime: brown and blue waters of Peru. Mar. Chem., 93: 81-103.
9		2000	-88.27	-1.7964	2		0.03	SE Pacific		Bruland, KW, Rue, EL, Smith, GJ, DiTullio, GR, 2005. Iron, macronutrients and diatom blooms in teh Peru upwelling regime: brown and blue waters of Peru. Mar. Chem., 93: 81-103.
9		2000	-88.1899	-1.84897	2		0.02	SE Pacific		Bruland, KW, Rue, EL, Smith, GJ, DiTullio, GR, 2005. Iron, macronutrients and diatom blooms in teh Peru upwelling regime: brown and blue waters of Peru. Mar. Chem., 93: 81-103.
9		2000	-88.0936	-1.91265	2		0.03	SE Pacific		Bruland, KW, Rue, EL, Smith, GJ, DiTullio, GR, 2005. Iron, macronutrients and diatom blooms in teh Peru upwelling regime: brown and blue waters of Peru. Mar. Chem., 93: 81-103.
9		2000	-87.9327	-2.01623	2		0.05	SE Pacific		Bruland, KW, Rue, EL, Smith, GJ, DiTullio, GR, 2005. Iron, macronutrients and diatom blooms in teh Peru upwelling regime: brown and blue waters of Peru. Mar. Chem., 93: 81-103.
9		2000	-87.7496	-2.13426	2		0.05	SE Pacific		Bruland, KW, Rue, EL, Smith, GJ, DiTullio, GR, 2005. Iron, macronutrients and diatom blooms in teh Peru upwelling regime: brown and blue waters of Peru. Mar. Chem., 93: 81-103.
9		2000	-87.5686	-2.25027	2		0.08	SE Pacific		Bruland, KW, Rue, EL, Smith, GJ, DiTullio, GR, 2005. Iron, macronutrients and diatom blooms in teh Peru upwelling regime: brown and blue waters of Peru. Mar. Chem., 93: 81-103.
9		2000	-87.4863	-2.31132	2		0.12	SE Pacific		Bruland, KW, Rue, EL, Smith, GJ, DiTullio, GR, 2005. Iron, macronutrients and diatom blooms in teh Peru upwelling regime: brown and blue waters of Peru. Mar. Chem., 93: 81-103.
9		2000	-87.3966	-2.37712	2		0.14	SE Pacific		Bruland, KW, Rue, EL, Smith, GJ, DiTullio, GR, 2005. Iron, macronutrients and diatom blooms in teh Peru upwelling regime: brown and blue waters of Peru. Mar. Chem., 93: 81-103.
9		2000	-86.7748	-2.78181	2		0.09	SE Pacific		Bruland, KW, Rue, EL, Smith, GJ, DiTullio, GR, 2005. Iron, macronutrients and diatom blooms in teh Peru upwelling regime: brown and blue waters of Peru. Mar. Chem., 93: 81-103.
9		2000	-86.6881	-2.83939	2		0.125	SE Pacific		Bruland, KW, Rue, EL, Smith, GJ, DiTullio, GR, 2005. Iron, macronutrients and diatom blooms in teh Peru upwelling regime: brown and blue waters of Peru. Mar. Chem., 93: 81-103.
9		2000	-86.5869	-2.90672	2		0.1	SE Pacific		Bruland, KW, Rue, EL, Smith, GJ, DiTullio, GR, 2005. Iron, macronutrients and diatom blooms in teh Peru upwelling regime: brown and blue waters of Peru. Mar. Chem., 93: 81-103.
9		2000	-86.499	-2.96507	2		0.05	SE Pacific		Bruland, KW, Rue, EL, Smith, GJ, DiTullio, GR, 2005. Iron, macronutrients and diatom blooms in teh Peru upwelling regime: brown and blue waters of Peru. Mar. Chem., 93: 81-103.
9		2000	-86.4025	-3.02922	2		0.09	SE Pacific		Bruland, KW, Rue, EL, Smith, GJ, DiTullio, GR, 2005. Iron, macronutrients and diatom blooms in teh Peru upwelling regime: brown and blue waters of Peru. Mar. Chem., 93: 81-103.
9		2000	-86.3043	-3.09448	2		0.06	SE Pacific		Bruland, KW, Rue, EL, Smith, GJ, DiTullio, GR, 2005. Iron, macronutrients and diatom blooms in teh Peru upwelling regime: brown and blue waters of Peru. Mar. Chem., 93: 81-103.
9		2000	-86.2072	-3.15893	2		0.06	SE Pacific		Bruland, KW, Rue, EL, Smith, GJ, DiTullio, GR, 2005. Iron, macronutrients and diatom blooms in teh Peru upwelling regime: brown and blue waters of Peru. Mar. Chem., 93: 81-103.
9		2000	-86.1093	-3.22398	2		0.06	SE Pacific		Bruland, KW, Rue, EL, Smith, GJ, DiTullio, GR, 2005. Iron, macronutrients and diatom blooms in teh Peru upwelling regime: brown and blue waters of Peru. Mar. Chem., 93: 81-103.
9		2000	-86.0117	-3.2889	2		0.06	SE Pacific		Bruland, KW, Rue, EL, Smith, GJ, DiTullio, GR, 2005. Iron, macronutrients and diatom blooms in teh Peru upwelling regime: brown and blue waters of Peru. Mar. Chem., 93: 81-103.
9		2000	-85.8104	-3.4226	2		0.12	SE Pacific		Bruland, KW, Rue, EL, Smith, GJ, DiTullio, GR, 2005. Iron, macronutrients and diatom blooms in teh Peru upwelling regime: brown and blue waters of Peru. Mar. Chem., 93: 81-103.
9		2000	-85.7123	-3.48771	2		0.14	SE Pacific		Bruland, KW, Rue, EL, Smith, GJ, DiTullio, GR, 2005. Iron, macronutrients and diatom blooms in teh Peru upwelling regime: brown and blue waters of Peru. Mar. Chem., 93: 81-103.
9		2000	-85.6201	-3.54894	2		0.08	SE Pacific		Bruland, KW, Rue, EL, Smith, GJ, DiTullio, GR, 2005. Iron, macronutrients and diatom blooms in teh Peru upwelling regime: brown and blue waters of Peru. Mar. Chem., 93: 81-103.
9		2000	-85.5109	-3.62154	2		0.08	SE Pacific		Bruland, KW, Rue, EL, Smith, GJ, DiTullio, GR, 2005. Iron, macronutrients and diatom blooms in teh Peru upwelling regime: brown and blue waters of Peru. Mar. Chem., 93: 81-103.
9		2000	-85.2964	-3.76277	2		0.09	SE Pacific		Bruland, KW, Rue, EL, Smith, GJ, DiTullio, GR, 2005. Iron, macronutrients and diatom blooms in teh Peru upwelling regime: brown and blue waters of Peru. Mar. Chem., 93: 81-103.
9		2000	-84.4716	-4.30808	2		0.1	SE Pacific		Bruland, KW, Rue, EL, Smith, GJ, DiTullio, GR, 2005. Iron, macronutrients and diatom blooms in teh Peru upwelling regime: brown and blue waters of Peru. Mar. Chem., 93: 81-103.
9		2000	-84.2982	-4.42637	2		0.09	SE Pacific		Bruland, KW, Rue, EL, Smith, GJ, DiTullio, GR, 2005. Iron, macronutrients and diatom blooms in teh Peru upwelling regime: brown and blue waters of Peru. Mar. Chem., 93: 81-103.
9		2000	-84.1202	-4.54449	2		0.05	SE Pacific		Bruland, KW, Rue, EL, Smith, GJ, DiTullio, GR, 2005. Iron, macronutrients and diatom blooms in teh Peru upwelling regime: brown and blue waters of Peru. Mar. Chem., 93: 81-103.
9		2000	-84.0389	-4.59846	2		0.05	SE Pacific		Bruland, KW, Rue, EL, Smith, GJ, DiTullio, GR, 2005. Iron, macronutrients and diatom blooms in teh Peru upwelling regime: brown and blue waters of Peru. Mar. Chem., 93: 81-103.
9		2000	-83.938	-4.66528	2		0.06	SE Pacific		Bruland, KW, Rue, EL, Smith, GJ, DiTullio, GR, 2005. Iron, macronutrients and diatom blooms in teh Peru upwelling regime: brown and blue waters of Peru. Mar. Chem., 93: 81-103.
9		2000	-83.8588	-4.71781	2		0.06	SE Pacific		Bruland, KW, Rue, EL, Smith, GJ, DiTullio, GR, 2005. Iron, macronutrients and diatom blooms in teh Peru upwelling regime: brown and blue waters of Peru. Mar. Chem., 93: 81-103.
9		2000	-83.7794	-4.77047	2		0.09	SE Pacific		Bruland, KW, Rue, EL, Smith, GJ, DiTullio, GR, 2005. Iron, macronutrients and diatom blooms in teh Peru upwelling regime: brown and blue waters of Peru. Mar. Chem., 93: 81-103.
9		2000	-83.6945	-4.82679	2		0.1	SE Pacific		Bruland, KW, Rue, EL, Smith, GJ, DiTullio, GR, 2005. Iron, macronutrients and diatom blooms in teh Peru upwelling regime: brown and blue waters of Peru. Mar. Chem., 93: 81-103.
9		2000	-82.9818	-5.29919	2		0.11	SE Pacific		Bruland, KW, Rue, EL, Smith, GJ, DiTullio, GR, 2005. Iron, macronutrients and diatom blooms in teh Peru upwelling regime: brown and blue waters of Peru. Mar. Chem., 93: 81-103.
9		2000	-82.9695	-5.3073	2		0.11	SE Pacific		Bruland, KW, Rue, EL, Smith, GJ, DiTullio, GR, 2005. Iron, macronutrients and diatom blooms in teh Peru upwelling regime: brown and blue waters of Peru. Mar. Chem., 93: 81-103.
9		2000	-82.8946	-5.35697	2		0.17	SE Pacific		Bruland, KW, Rue, EL, Smith, GJ, DiTullio, GR, 2005. Iron, macronutrients and diatom blooms in teh Peru upwelling regime: brown and blue waters of Peru. Mar. Chem., 93: 81-103.
9		2000	-82.8051	-5.41626	2		0.16	SE Pacific		Bruland, KW, Rue, EL, Smith, GJ, DiTullio, GR, 2005. Iron, macronutrients and diatom blooms in teh Peru upwelling regime: brown and blue waters of Peru. Mar. Chem., 93: 81-103.
9		2000	-82.7171	-5.47454	2		0.14	SE Pacific		Bruland, KW, Rue, EL, Smith, GJ, DiTullio, GR, 2005. Iron, macronutrients and diatom blooms in teh Peru upwelling regime: brown and blue waters of Peru. Mar. Chem., 93: 81-103.
9		2000	-82.6249	-5.53557	2		0.16	SE Pacific		Bruland, KW, Rue, EL, Smith, GJ, DiTullio, GR, 2005. Iron, macronutrients and diatom blooms in teh Peru upwelling regime: brown and blue waters of Peru. Mar. Chem., 93: 81-103.
9		2000	-82.5353	-5.59489	2		0.15	SE Pacific		Bruland, KW, Rue, EL, Smith, GJ, DiTullio, GR, 2005. Iron, macronutrients and diatom blooms in teh Peru upwelling regime: brown and blue waters of Peru. Mar. Chem., 93: 81-103.
9		2000	-82.4535	-5.64906	2		0.04	SE Pacific		Bruland, KW, Rue, EL, Smith, GJ, DiTullio, GR, 2005. Iron, macronutrients and diatom blooms in teh Peru upwelling regime: brown and blue waters of Peru. Mar. Chem., 93: 81-103.
9		2000	-82.3677	-5.70591	2		0.07	SE Pacific		Bruland, KW, Rue, EL, Smith, GJ, DiTullio, GR, 2005. Iron, macronutrients and diatom blooms in teh Peru upwelling regime: brown and blue waters of Peru. Mar. Chem., 93: 81-103.
9		2000	-82.275	-5.76727	2		0.07	SE Pacific		Bruland, KW, Rue, EL, Smith, GJ, DiTullio, GR, 2005. Iron, macronutrients and diatom blooms in teh Peru upwelling regime: brown and blue waters of Peru. Mar. Chem., 93: 81-103.
9		2000	-82.1271	-5.86517	2		0.07	SE Pacific		Bruland, KW, Rue, EL, Smith, GJ, DiTullio, GR, 2005. Iron, macronutrients and diatom blooms in teh Peru upwelling regime: brown and blue waters of Peru. Mar. Chem., 93: 81-103.
9		2000	-82.0598	-5.90978	2		0.07	SE Pacific		Bruland, KW, Rue, EL, Smith, GJ, DiTullio, GR, 2005. Iron, macronutrients and diatom blooms in teh Peru upwelling regime: brown and blue waters of Peru. Mar. Chem., 93: 81-103.
9		2000	-81.9832	-5.96237	2		0.05	SE Pacific		Bruland, KW, Rue, EL, Smith, GJ, DiTullio, GR, 2005. Iron, macronutrients and diatom blooms in teh Peru upwelling regime: brown and blue waters of Peru. Mar. Chem., 93: 81-103.
9		2000	-81.9206	-6.00185	2		0.09	SE Pacific		Bruland, KW, Rue, EL, Smith, GJ, DiTullio, GR, 2005. Iron, macronutrients and diatom blooms in teh Peru upwelling regime: brown and blue waters of Peru. Mar. Chem., 93: 81-103.
9		2000	-81.8591	-6.04256	2		0.16	SE Pacific		Bruland, KW, Rue, EL, Smith, GJ, DiTullio, GR, 2005. Iron, macronutrients and diatom blooms in teh Peru upwelling regime: brown and blue waters of Peru. Mar. Chem., 93: 81-103.
9		2000	-81.3198	-6.39933	2		1.1	SE Pacific		Bruland, KW, Rue, EL, Smith, GJ, DiTullio, GR, 2005. Iron, macronutrients and diatom blooms in teh Peru upwelling regime: brown and blue waters of Peru. Mar. Chem., 93: 81-103.
9		2000	-81.2297	-6.45885	2		1.1	SE Pacific		Bruland, KW, Rue, EL, Smith, GJ, DiTullio, GR, 2005. Iron, macronutrients and diatom blooms in teh Peru upwelling regime: brown and blue waters of Peru. Mar. Chem., 93: 81-103.
9		2000	-81.1346	-6.52172	2		0.27	SE Pacific		Bruland, KW, Rue, EL, Smith, GJ, DiTullio, GR, 2005. Iron, macronutrients and diatom blooms in teh Peru upwelling regime: brown and blue waters of Peru. Mar. Chem., 93: 81-103.
9		2000	-81.0354	-6.58728	2		1.9	SE Pacific		Bruland, KW, Rue, EL, Smith, GJ, DiTullio, GR, 2005. Iron, macronutrients and diatom blooms in teh Peru upwelling regime: brown and blue waters of Peru. Mar. Chem., 93: 81-103.
9		2000	-80.9526	-6.642	2		0.65	SE Pacific		Bruland, KW, Rue, EL, Smith, GJ, DiTullio, GR, 2005. Iron, macronutrients and diatom blooms in teh Peru upwelling regime: brown and blue waters of Peru. Mar. Chem., 93: 81-103.
9		2000	-80.8653	-6.69978	2		1.35	SE Pacific		Bruland, KW, Rue, EL, Smith, GJ, DiTullio, GR, 2005. Iron, macronutrients and diatom blooms in teh Peru upwelling regime: brown and blue waters of Peru. Mar. Chem., 93: 81-103.
9		2000	-80.7798	-6.75621	2		1.44	SE Pacific		Bruland, KW, Rue, EL, Smith, GJ, DiTullio, GR, 2005. Iron, macronutrients and diatom blooms in teh Peru upwelling regime: brown and blue waters of Peru. Mar. Chem., 93: 81-103.
9		2000	-80.6764	-6.82016	2		0.12	SE Pacific		Bruland, KW, Rue, EL, Smith, GJ, DiTullio, GR, 2005. Iron, macronutrients and diatom blooms in teh Peru upwelling regime: brown and blue waters of Peru. Mar. Chem., 93: 81-103.
9		2000	-80.5975	-6.87666	2		2	SE Pacific		Bruland, KW, Rue, EL, Smith, GJ, DiTullio, GR, 2005. Iron, macronutrients and diatom blooms in teh Peru upwelling regime: brown and blue waters of Peru. Mar. Chem., 93: 81-103.
9		2000	-80.5362	-6.91707	2		0.44	SE Pacific		Bruland, KW, Rue, EL, Smith, GJ, DiTullio, GR, 2005. Iron, macronutrients and diatom blooms in teh Peru upwelling regime: brown and blue waters of Peru. Mar. Chem., 93: 81-103.
9		2000	-80.4532	-6.97201	2		1.57	SE Pacific		Bruland, KW, Rue, EL, Smith, GJ, DiTullio, GR, 2005. Iron, macronutrients and diatom blooms in teh Peru upwelling regime: brown and blue waters of Peru. Mar. Chem., 93: 81-103.
9		2000	-80.274	-7.09033	2		1.45	SE Pacific		Bruland, KW, Rue, EL, Smith, GJ, DiTullio, GR, 2005. Iron, macronutrients and diatom blooms in teh Peru upwelling regime: brown and blue waters of Peru. Mar. Chem., 93: 81-103.
9		2000	-80.2505	-7.10605	2		2.1	SE Pacific		Bruland, KW, Rue, EL, Smith, GJ, DiTullio, GR, 2005. Iron, macronutrients and diatom blooms in teh Peru upwelling regime: brown and blue waters of Peru. Mar. Chem., 93: 81-103.
9		2000	-80.245	-7.10971	2		2.1	SE Pacific		Bruland, KW, Rue, EL, Smith, GJ, DiTullio, GR, 2005. Iron, macronutrients and diatom blooms in teh Peru upwelling regime: brown and blue waters of Peru. Mar. Chem., 93: 81-103.
9		2000	-80.2436	-7.11063	2		2	SE Pacific		Bruland, KW, Rue, EL, Smith, GJ, DiTullio, GR, 2005. Iron, macronutrients and diatom blooms in teh Peru upwelling regime: brown and blue waters of Peru. Mar. Chem., 93: 81-103.
9		2000	-80.1941	-7.1433	2		2	SE Pacific		Bruland, KW, Rue, EL, Smith, GJ, DiTullio, GR, 2005. Iron, macronutrients and diatom blooms in teh Peru upwelling regime: brown and blue waters of Peru. Mar. Chem., 93: 81-103.
9		2000	-80.0937	-7.2096	2		2.25	SE Pacific		Bruland, KW, Rue, EL, Smith, GJ, DiTullio, GR, 2005. Iron, macronutrients and diatom blooms in teh Peru upwelling regime: brown and blue waters of Peru. Mar. Chem., 93: 81-103.
9		2000	-80.0878	-7.21344	2		3.1	SE Pacific		Bruland, KW, Rue, EL, Smith, GJ, DiTullio, GR, 2005. Iron, macronutrients and diatom blooms in teh Peru upwelling regime: brown and blue waters of Peru. Mar. Chem., 93: 81-103.
9		2000	-80.0209	-7.25763	2		3.5	SE Pacific		Bruland, KW, Rue, EL, Smith, GJ, DiTullio, GR, 2005. Iron, macronutrients and diatom blooms in teh Peru upwelling regime: brown and blue waters of Peru. Mar. Chem., 93: 81-103.
9		2000	-80.0166	-7.2605	2		3.6	SE Pacific		Bruland, KW, Rue, EL, Smith, GJ, DiTullio, GR, 2005. Iron, macronutrients and diatom blooms in teh Peru upwelling regime: brown and blue waters of Peru. Mar. Chem., 93: 81-103.
9		2000	-79.931	-7.3169	2		3.8	SE Pacific		Bruland, KW, Rue, EL, Smith, GJ, DiTullio, GR, 2005. Iron, macronutrients and diatom blooms in teh Peru upwelling regime: brown and blue waters of Peru. Mar. Chem., 93: 81-103.
9		2000	-79.9266	-7.31977	2		3.4	SE Pacific		Bruland, KW, Rue, EL, Smith, GJ, DiTullio, GR, 2005. Iron, macronutrients and diatom blooms in teh Peru upwelling regime: brown and blue waters of Peru. Mar. Chem., 93: 81-103.
9		2000	-79.8386	-7.37781	2		4.4	SE Pacific		Bruland, KW, Rue, EL, Smith, GJ, DiTullio, GR, 2005. Iron, macronutrients and diatom blooms in teh Peru upwelling regime: brown and blue waters of Peru. Mar. Chem., 93: 81-103.
9		2000	-79.8386	-7.37781	2		3.4	SE Pacific		Bruland, KW, Rue, EL, Smith, GJ, DiTullio, GR, 2005. Iron, macronutrients and diatom blooms in teh Peru upwelling regime: brown and blue waters of Peru. Mar. Chem., 93: 81-103.
9		2000	-79.758	-7.431	2		3.4	SE Pacific		Bruland, KW, Rue, EL, Smith, GJ, DiTullio, GR, 2005. Iron, macronutrients and diatom blooms in teh Peru upwelling regime: brown and blue waters of Peru. Mar. Chem., 93: 81-103.
9		2000	-79.7492	-7.43676	2		5.5	SE Pacific		Bruland, KW, Rue, EL, Smith, GJ, DiTullio, GR, 2005. Iron, macronutrients and diatom blooms in teh Peru upwelling regime: brown and blue waters of Peru. Mar. Chem., 93: 81-103.
9		2000	-79.6747	-7.4929	2		3.5	SE Pacific		Bruland, KW, Rue, EL, Smith, GJ, DiTullio, GR, 2005. Iron, macronutrients and diatom blooms in teh Peru upwelling regime: brown and blue waters of Peru. Mar. Chem., 93: 81-103.
9		2000	-79.6695	-7.49725	2		8.8	SE Pacific		Bruland, KW, Rue, EL, Smith, GJ, DiTullio, GR, 2005. Iron, macronutrients and diatom blooms in teh Peru upwelling regime: brown and blue waters of Peru. Mar. Chem., 93: 81-103.
9		2000	-79.5755	-7.57569	2		11.1	SE Pacific		Bruland, KW, Rue, EL, Smith, GJ, DiTullio, GR, 2005. Iron, macronutrients and diatom blooms in teh Peru upwelling regime: brown and blue waters of Peru. Mar. Chem., 93: 81-103.
9		2000	-79.5742	-7.57678	2		3.5	SE Pacific		Bruland, KW, Rue, EL, Smith, GJ, DiTullio, GR, 2005. Iron, macronutrients and diatom blooms in teh Peru upwelling regime: brown and blue waters of Peru. Mar. Chem., 93: 81-103.
9		2000	-76.5698	-12.8947	2		1.8	SE Pacific		Bruland, KW, Rue, EL, Smith, GJ, DiTullio, GR, 2005. Iron, macronutrients and diatom blooms in teh Peru upwelling regime: brown and blue waters of Peru. Mar. Chem., 93: 81-103.
9		2000	-76.5623	-12.9412	2		1.8	SE Pacific		Bruland, KW, Rue, EL, Smith, GJ, DiTullio, GR, 2005. Iron, macronutrients and diatom blooms in teh Peru upwelling regime: brown and blue waters of Peru. Mar. Chem., 93: 81-103.
9		2000	-76.5463	-13.0094	2		0.75	SE Pacific		Bruland, KW, Rue, EL, Smith, GJ, DiTullio, GR, 2005. Iron, macronutrients and diatom blooms in teh Peru upwelling regime: brown and blue waters of Peru. Mar. Chem., 93: 81-103.
9		2000	-76.543	-13.0549	2		0.75	SE Pacific		Bruland, KW, Rue, EL, Smith, GJ, DiTullio, GR, 2005. Iron, macronutrients and diatom blooms in teh Peru upwelling regime: brown and blue waters of Peru. Mar. Chem., 93: 81-103.
9		2000	-76.5825	-13.0864	2		0.58	SE Pacific		Bruland, KW, Rue, EL, Smith, GJ, DiTullio, GR, 2005. Iron, macronutrients and diatom blooms in teh Peru upwelling regime: brown and blue waters of Peru. Mar. Chem., 93: 81-103.
9		2000	-76.6601	-13.1374	2		0.17	SE Pacific		Bruland, KW, Rue, EL, Smith, GJ, DiTullio, GR, 2005. Iron, macronutrients and diatom blooms in teh Peru upwelling regime: brown and blue waters of Peru. Mar. Chem., 93: 81-103.
9		2000	-76.7522	-13.1915	2		0.11	SE Pacific		Bruland, KW, Rue, EL, Smith, GJ, DiTullio, GR, 2005. Iron, macronutrients and diatom blooms in teh Peru upwelling regime: brown and blue waters of Peru. Mar. Chem., 93: 81-103.
9		2000	-76.8586	-13.2605	2		0.05	SE Pacific		Bruland, KW, Rue, EL, Smith, GJ, DiTullio, GR, 2005. Iron, macronutrients and diatom blooms in teh Peru upwelling regime: brown and blue waters of Peru. Mar. Chem., 93: 81-103.
9		2000	-76.9468	-13.3177	2		0.05	SE Pacific		Bruland, KW, Rue, EL, Smith, GJ, DiTullio, GR, 2005. Iron, macronutrients and diatom blooms in teh Peru upwelling regime: brown and blue waters of Peru. Mar. Chem., 93: 81-103.
9		2000	-77.16	-13.46	2		0.05	SE Pacific		Bruland, KW, Rue, EL, Smith, GJ, DiTullio, GR, 2005. Iron, macronutrients and diatom blooms in teh Peru upwelling regime: brown and blue waters of Peru. Mar. Chem., 93: 81-103.
9		2000	-77.2559	-13.5182	2		0.25	SE Pacific		Bruland, KW, Rue, EL, Smith, GJ, DiTullio, GR, 2005. Iron, macronutrients and diatom blooms in teh Peru upwelling regime: brown and blue waters of Peru. Mar. Chem., 93: 81-103.
9		2000	-77.3576	-13.5841	2		0.48	SE Pacific		Bruland, KW, Rue, EL, Smith, GJ, DiTullio, GR, 2005. Iron, macronutrients and diatom blooms in teh Peru upwelling regime: brown and blue waters of Peru. Mar. Chem., 93: 81-103.
9		2000	-77.4368	-13.6354	2		0.65	SE Pacific		Bruland, KW, Rue, EL, Smith, GJ, DiTullio, GR, 2005. Iron, macronutrients and diatom blooms in teh Peru upwelling regime: brown and blue waters of Peru. Mar. Chem., 93: 81-103.
9		2000	-77.4987	-13.6755	2		1.07	SE Pacific		Bruland, KW, Rue, EL, Smith, GJ, DiTullio, GR, 2005. Iron, macronutrients and diatom blooms in teh Peru upwelling regime: brown and blue waters of Peru. Mar. Chem., 93: 81-103.
9		2000	-77.5017	-13.6774	2		0.78	SE Pacific		Bruland, KW, Rue, EL, Smith, GJ, DiTullio, GR, 2005. Iron, macronutrients and diatom blooms in teh Peru upwelling regime: brown and blue waters of Peru. Mar. Chem., 93: 81-103.
9		2000	-77.5047	-13.6794	2		0.9	SE Pacific		Bruland, KW, Rue, EL, Smith, GJ, DiTullio, GR, 2005. Iron, macronutrients and diatom blooms in teh Peru upwelling regime: brown and blue waters of Peru. Mar. Chem., 93: 81-103.
9		2000	-77.5838	-13.7306	2		0.7	SE Pacific		Bruland, KW, Rue, EL, Smith, GJ, DiTullio, GR, 2005. Iron, macronutrients and diatom blooms in teh Peru upwelling regime: brown and blue waters of Peru. Mar. Chem., 93: 81-103.
9		2000	-77.5897	-13.7344	2		0.52	SE Pacific		Bruland, KW, Rue, EL, Smith, GJ, DiTullio, GR, 2005. Iron, macronutrients and diatom blooms in teh Peru upwelling regime: brown and blue waters of Peru. Mar. Chem., 93: 81-103.
9		2000	-77.6749	-13.7896	2		0.81	SE Pacific		Bruland, KW, Rue, EL, Smith, GJ, DiTullio, GR, 2005. Iron, macronutrients and diatom blooms in teh Peru upwelling regime: brown and blue waters of Peru. Mar. Chem., 93: 81-103.
9		2000	-77.681	-13.7936	2		0.31	SE Pacific		Bruland, KW, Rue, EL, Smith, GJ, DiTullio, GR, 2005. Iron, macronutrients and diatom blooms in teh Peru upwelling regime: brown and blue waters of Peru. Mar. Chem., 93: 81-103.
9		2000	-77.7706	-13.8515	2		0.75	SE Pacific		Bruland, KW, Rue, EL, Smith, GJ, DiTullio, GR, 2005. Iron, macronutrients and diatom blooms in teh Peru upwelling regime: brown and blue waters of Peru. Mar. Chem., 93: 81-103.
9		2000	-77.7768	-13.8555	2		0.32	SE Pacific		Bruland, KW, Rue, EL, Smith, GJ, DiTullio, GR, 2005. Iron, macronutrients and diatom blooms in teh Peru upwelling regime: brown and blue waters of Peru. Mar. Chem., 93: 81-103.
9		2000	-77.8643	-13.9122	2		0.33	SE Pacific		Bruland, KW, Rue, EL, Smith, GJ, DiTullio, GR, 2005. Iron, macronutrients and diatom blooms in teh Peru upwelling regime: brown and blue waters of Peru. Mar. Chem., 93: 81-103.
9		2000	-77.8673	-13.9141	2		0.25	SE Pacific		Bruland, KW, Rue, EL, Smith, GJ, DiTullio, GR, 2005. Iron, macronutrients and diatom blooms in teh Peru upwelling regime: brown and blue waters of Peru. Mar. Chem., 93: 81-103.
9		2000	-77.9908	-13.9748	2		0.2	SE Pacific		Bruland, KW, Rue, EL, Smith, GJ, DiTullio, GR, 2005. Iron, macronutrients and diatom blooms in teh Peru upwelling regime: brown and blue waters of Peru. Mar. Chem., 93: 81-103.
9		2000	-77.9932	-13.9772	2		0.33	SE Pacific		Bruland, KW, Rue, EL, Smith, GJ, DiTullio, GR, 2005. Iron, macronutrients and diatom blooms in teh Peru upwelling regime: brown and blue waters of Peru. Mar. Chem., 93: 81-103.
9		2000	-78.0674	-14.0442	2		0.11	SE Pacific		Bruland, KW, Rue, EL, Smith, GJ, DiTullio, GR, 2005. Iron, macronutrients and diatom blooms in teh Peru upwelling regime: brown and blue waters of Peru. Mar. Chem., 93: 81-103.
9		2000	-78.0733	-14.0481	2		0.13	SE Pacific		Bruland, KW, Rue, EL, Smith, GJ, DiTullio, GR, 2005. Iron, macronutrients and diatom blooms in teh Peru upwelling regime: brown and blue waters of Peru. Mar. Chem., 93: 81-103.
9		2000	-78.1415	-14.0932	2		0.3	SE Pacific		Bruland, KW, Rue, EL, Smith, GJ, DiTullio, GR, 2005. Iron, macronutrients and diatom blooms in teh Peru upwelling regime: brown and blue waters of Peru. Mar. Chem., 93: 81-103.
9		2000	-78.1801	-14.1186	2		0.28	SE Pacific		Bruland, KW, Rue, EL, Smith, GJ, DiTullio, GR, 2005. Iron, macronutrients and diatom blooms in teh Peru upwelling regime: brown and blue waters of Peru. Mar. Chem., 93: 81-103.
9		2000	-78.2429	-14.16	2		0.3	SE Pacific		Bruland, KW, Rue, EL, Smith, GJ, DiTullio, GR, 2005. Iron, macronutrients and diatom blooms in teh Peru upwelling regime: brown and blue waters of Peru. Mar. Chem., 93: 81-103.
9		2000	-78.2459	-14.1619	2		0.3	SE Pacific		Bruland, KW, Rue, EL, Smith, GJ, DiTullio, GR, 2005. Iron, macronutrients and diatom blooms in teh Peru upwelling regime: brown and blue waters of Peru. Mar. Chem., 93: 81-103.
9		2000	-78.328	-14.216	2		0.3	SE Pacific		Bruland, KW, Rue, EL, Smith, GJ, DiTullio, GR, 2005. Iron, macronutrients and diatom blooms in teh Peru upwelling regime: brown and blue waters of Peru. Mar. Chem., 93: 81-103.
9		2000	-78.3338	-14.2198	2		0.24	SE Pacific		Bruland, KW, Rue, EL, Smith, GJ, DiTullio, GR, 2005. Iron, macronutrients and diatom blooms in teh Peru upwelling regime: brown and blue waters of Peru. Mar. Chem., 93: 81-103.
9		2000	-78.42	-14.2765	2		0.2	SE Pacific		Bruland, KW, Rue, EL, Smith, GJ, DiTullio, GR, 2005. Iron, macronutrients and diatom blooms in teh Peru upwelling regime: brown and blue waters of Peru. Mar. Chem., 93: 81-103.
9		2000	-78.5132	-14.3379	2		0.3	SE Pacific		Bruland, KW, Rue, EL, Smith, GJ, DiTullio, GR, 2005. Iron, macronutrients and diatom blooms in teh Peru upwelling regime: brown and blue waters of Peru. Mar. Chem., 93: 81-103.
9		2000	-78.5891	-14.3877	2		0.3	SE Pacific		Bruland, KW, Rue, EL, Smith, GJ, DiTullio, GR, 2005. Iron, macronutrients and diatom blooms in teh Peru upwelling regime: brown and blue waters of Peru. Mar. Chem., 93: 81-103.
9		2000	-78.6673	-14.4391	2		0.3	SE Pacific		Bruland, KW, Rue, EL, Smith, GJ, DiTullio, GR, 2005. Iron, macronutrients and diatom blooms in teh Peru upwelling regime: brown and blue waters of Peru. Mar. Chem., 93: 81-103.
9		2000	-75.2321	-15.4029	2		2.3	SE Pacific		Bruland, KW, Rue, EL, Smith, GJ, DiTullio, GR, 2005. Iron, macronutrients and diatom blooms in teh Peru upwelling regime: brown and blue waters of Peru. Mar. Chem., 93: 81-103.
9		2000	-75.1862	-15.4283	2		1.9	SE Pacific		Bruland, KW, Rue, EL, Smith, GJ, DiTullio, GR, 2005. Iron, macronutrients and diatom blooms in teh Peru upwelling regime: brown and blue waters of Peru. Mar. Chem., 93: 81-103.
9		2000	-75.1387	-15.4534	2		2.1	SE Pacific		Bruland, KW, Rue, EL, Smith, GJ, DiTullio, GR, 2005. Iron, macronutrients and diatom blooms in teh Peru upwelling regime: brown and blue waters of Peru. Mar. Chem., 93: 81-103.
9		2000	-75.1269	-15.4971	2		1.5	SE Pacific		Bruland, KW, Rue, EL, Smith, GJ, DiTullio, GR, 2005. Iron, macronutrients and diatom blooms in teh Peru upwelling regime: brown and blue waters of Peru. Mar. Chem., 93: 81-103.
9		2000	-75.1619	-15.5409	2		0.74	SE Pacific		Bruland, KW, Rue, EL, Smith, GJ, DiTullio, GR, 2005. Iron, macronutrients and diatom blooms in teh Peru upwelling regime: brown and blue waters of Peru. Mar. Chem., 93: 81-103.
9		2000	-75.2267	-15.6335	2		0.35	SE Pacific		Bruland, KW, Rue, EL, Smith, GJ, DiTullio, GR, 2005. Iron, macronutrients and diatom blooms in teh Peru upwelling regime: brown and blue waters of Peru. Mar. Chem., 93: 81-103.
9		2000	-75.2964	-15.7254	2		0.48	SE Pacific		Bruland, KW, Rue, EL, Smith, GJ, DiTullio, GR, 2005. Iron, macronutrients and diatom blooms in teh Peru upwelling regime: brown and blue waters of Peru. Mar. Chem., 93: 81-103.
9		2000	-75.3707	-15.8236	2		0.46	SE Pacific		Bruland, KW, Rue, EL, Smith, GJ, DiTullio, GR, 2005. Iron, macronutrients and diatom blooms in teh Peru upwelling regime: brown and blue waters of Peru. Mar. Chem., 93: 81-103.
9		2000	-75.4777	-15.7754	2		0.46	SE Pacific		Bruland, KW, Rue, EL, Smith, GJ, DiTullio, GR, 2005. Iron, macronutrients and diatom blooms in teh Peru upwelling regime: brown and blue waters of Peru. Mar. Chem., 93: 81-103.
9		2000	-75.5992	-15.6911	2		0.56	SE Pacific		Bruland, KW, Rue, EL, Smith, GJ, DiTullio, GR, 2005. Iron, macronutrients and diatom blooms in teh Peru upwelling regime: brown and blue waters of Peru. Mar. Chem., 93: 81-103.
9		2000	-75.7342	-15.5969	2		0.21	SE Pacific		Bruland, KW, Rue, EL, Smith, GJ, DiTullio, GR, 2005. Iron, macronutrients and diatom blooms in teh Peru upwelling regime: brown and blue waters of Peru. Mar. Chem., 93: 81-103.
9		2000	-75.88	-15.3379	2		0.06	SE Pacific		Bruland, KW, Rue, EL, Smith, GJ, DiTullio, GR, 2005. Iron, macronutrients and diatom blooms in teh Peru upwelling regime: brown and blue waters of Peru. Mar. Chem., 93: 81-103.
9		2000	-75.9991	-15.4011	2		0.03	SE Pacific		Bruland, KW, Rue, EL, Smith, GJ, DiTullio, GR, 2005. Iron, macronutrients and diatom blooms in teh Peru upwelling regime: brown and blue waters of Peru. Mar. Chem., 93: 81-103.
9		2000	-76.0133	-15.2865	2		0.08	SE Pacific		Bruland, KW, Rue, EL, Smith, GJ, DiTullio, GR, 2005. Iron, macronutrients and diatom blooms in teh Peru upwelling regime: brown and blue waters of Peru. Mar. Chem., 93: 81-103.
9		2000	-76.0046	-15.2257	2		0.12	SE Pacific		Bruland, KW, Rue, EL, Smith, GJ, DiTullio, GR, 2005. Iron, macronutrients and diatom blooms in teh Peru upwelling regime: brown and blue waters of Peru. Mar. Chem., 93: 81-103.
9		2000	-75.9357	-15.2829	2		0.06	SE Pacific		Bruland, KW, Rue, EL, Smith, GJ, DiTullio, GR, 2005. Iron, macronutrients and diatom blooms in teh Peru upwelling regime: brown and blue waters of Peru. Mar. Chem., 93: 81-103.
9		2000	-75.8574	-15.3296	2		0.13	SE Pacific		Bruland, KW, Rue, EL, Smith, GJ, DiTullio, GR, 2005. Iron, macronutrients and diatom blooms in teh Peru upwelling regime: brown and blue waters of Peru. Mar. Chem., 93: 81-103.
9		2000	-75.7579	-15.3322	2		0.11	SE Pacific		Bruland, KW, Rue, EL, Smith, GJ, DiTullio, GR, 2005. Iron, macronutrients and diatom blooms in teh Peru upwelling regime: brown and blue waters of Peru. Mar. Chem., 93: 81-103.
9		2000	-75.6622	-15.3333	2		0.09	SE Pacific		Bruland, KW, Rue, EL, Smith, GJ, DiTullio, GR, 2005. Iron, macronutrients and diatom blooms in teh Peru upwelling regime: brown and blue waters of Peru. Mar. Chem., 93: 81-103.
9		2000	-75.6095	-15.3793	2		0.14	SE Pacific		Bruland, KW, Rue, EL, Smith, GJ, DiTullio, GR, 2005. Iron, macronutrients and diatom blooms in teh Peru upwelling regime: brown and blue waters of Peru. Mar. Chem., 93: 81-103.
9		2000	-75.5507	-15.4449	2		0.13	SE Pacific		Bruland, KW, Rue, EL, Smith, GJ, DiTullio, GR, 2005. Iron, macronutrients and diatom blooms in teh Peru upwelling regime: brown and blue waters of Peru. Mar. Chem., 93: 81-103.
9		2000	-75.4833	-15.5197	2		0.14	SE Pacific		Bruland, KW, Rue, EL, Smith, GJ, DiTullio, GR, 2005. Iron, macronutrients and diatom blooms in teh Peru upwelling regime: brown and blue waters of Peru. Mar. Chem., 93: 81-103.
9		2000	-75.3255	-15.5919	2		0.22	SE Pacific		Bruland, KW, Rue, EL, Smith, GJ, DiTullio, GR, 2005. Iron, macronutrients and diatom blooms in teh Peru upwelling regime: brown and blue waters of Peru. Mar. Chem., 93: 81-103.
9		2000	-75.2244	-15.6249	2		0.22	SE Pacific		Bruland, KW, Rue, EL, Smith, GJ, DiTullio, GR, 2005. Iron, macronutrients and diatom blooms in teh Peru upwelling regime: brown and blue waters of Peru. Mar. Chem., 93: 81-103.
9		2000	-75.1586	-15.666	2		0.27	SE Pacific		Bruland, KW, Rue, EL, Smith, GJ, DiTullio, GR, 2005. Iron, macronutrients and diatom blooms in teh Peru upwelling regime: brown and blue waters of Peru. Mar. Chem., 93: 81-103.
9		2000	-72.1499	-17.0422	2		0.09	SE Pacific		Bruland, KW, Rue, EL, Smith, GJ, DiTullio, GR, 2005. Iron, macronutrients and diatom blooms in teh Peru upwelling regime: brown and blue waters of Peru. Mar. Chem., 93: 81-103.
9		2000	-72.153	-17.0395	2		0.1	SE Pacific		Bruland, KW, Rue, EL, Smith, GJ, DiTullio, GR, 2005. Iron, macronutrients and diatom blooms in teh Peru upwelling regime: brown and blue waters of Peru. Mar. Chem., 93: 81-103.
9		2000	-72.1739	-17.019	2		0.19	SE Pacific		Bruland, KW, Rue, EL, Smith, GJ, DiTullio, GR, 2005. Iron, macronutrients and diatom blooms in teh Peru upwelling regime: brown and blue waters of Peru. Mar. Chem., 93: 81-103.
9		2000	-72.2183	-16.9744	2		0.44	SE Pacific		Bruland, KW, Rue, EL, Smith, GJ, DiTullio, GR, 2005. Iron, macronutrients and diatom blooms in teh Peru upwelling regime: brown and blue waters of Peru. Mar. Chem., 93: 81-103.
9		2000	-72.2738	-16.9495	2		0.65	SE Pacific		Bruland, KW, Rue, EL, Smith, GJ, DiTullio, GR, 2005. Iron, macronutrients and diatom blooms in teh Peru upwelling regime: brown and blue waters of Peru. Mar. Chem., 93: 81-103.
9		2000	-72.3206	-16.9541	2		0.5	SE Pacific		Bruland, KW, Rue, EL, Smith, GJ, DiTullio, GR, 2005. Iron, macronutrients and diatom blooms in teh Peru upwelling regime: brown and blue waters of Peru. Mar. Chem., 93: 81-103.
9		2000	-72.3523	-17.0002	2		0.5	SE Pacific		Bruland, KW, Rue, EL, Smith, GJ, DiTullio, GR, 2005. Iron, macronutrients and diatom blooms in teh Peru upwelling regime: brown and blue waters of Peru. Mar. Chem., 93: 81-103.
9		2000	-72.3866	-17.0501	2		0.05	SE Pacific		Bruland, KW, Rue, EL, Smith, GJ, DiTullio, GR, 2005. Iron, macronutrients and diatom blooms in teh Peru upwelling regime: brown and blue waters of Peru. Mar. Chem., 93: 81-103.
9		2000	-72.4506	-17.1434	2		0.22	SE Pacific		Bruland, KW, Rue, EL, Smith, GJ, DiTullio, GR, 2005. Iron, macronutrients and diatom blooms in teh Peru upwelling regime: brown and blue waters of Peru. Mar. Chem., 93: 81-103.
9		2000	-72.5379	-17.2707	2		0.08	SE Pacific		Bruland, KW, Rue, EL, Smith, GJ, DiTullio, GR, 2005. Iron, macronutrients and diatom blooms in teh Peru upwelling regime: brown and blue waters of Peru. Mar. Chem., 93: 81-103.
9		2000	-72.5894	-17.3462	2		0.04	SE Pacific		Bruland, KW, Rue, EL, Smith, GJ, DiTullio, GR, 2005. Iron, macronutrients and diatom blooms in teh Peru upwelling regime: brown and blue waters of Peru. Mar. Chem., 93: 81-103.
9		2000	-72.6486	-17.4333	2		0.04	SE Pacific		Bruland, KW, Rue, EL, Smith, GJ, DiTullio, GR, 2005. Iron, macronutrients and diatom blooms in teh Peru upwelling regime: brown and blue waters of Peru. Mar. Chem., 93: 81-103.
9		2000	-72.7345	-17.5588	2		0.04	SE Pacific		Bruland, KW, Rue, EL, Smith, GJ, DiTullio, GR, 2005. Iron, macronutrients and diatom blooms in teh Peru upwelling regime: brown and blue waters of Peru. Mar. Chem., 93: 81-103.
9		2000	-72.8185	-17.6814	2		0.04	SE Pacific		Bruland, KW, Rue, EL, Smith, GJ, DiTullio, GR, 2005. Iron, macronutrients and diatom blooms in teh Peru upwelling regime: brown and blue waters of Peru. Mar. Chem., 93: 81-103.
9		2000	-72.8214	-17.6857	2		0.03	SE Pacific		Bruland, KW, Rue, EL, Smith, GJ, DiTullio, GR, 2005. Iron, macronutrients and diatom blooms in teh Peru upwelling regime: brown and blue waters of Peru. Mar. Chem., 93: 81-103.
9		2000	-71.4866	-17.7067	2		0.03	SE Pacific		Bruland, KW, Rue, EL, Smith, GJ, DiTullio, GR, 2005. Iron, macronutrients and diatom blooms in teh Peru upwelling regime: brown and blue waters of Peru. Mar. Chem., 93: 81-103.
9		2000	-71.476	-17.7156	2		0.03	SE Pacific		Bruland, KW, Rue, EL, Smith, GJ, DiTullio, GR, 2005. Iron, macronutrients and diatom blooms in teh Peru upwelling regime: brown and blue waters of Peru. Mar. Chem., 93: 81-103.
9		2000	-71.4483	-17.7414	2		0.03	SE Pacific		Bruland, KW, Rue, EL, Smith, GJ, DiTullio, GR, 2005. Iron, macronutrients and diatom blooms in teh Peru upwelling regime: brown and blue waters of Peru. Mar. Chem., 93: 81-103.
9		2000	-71.4028	-17.7598	2		0.03	SE Pacific		Bruland, KW, Rue, EL, Smith, GJ, DiTullio, GR, 2005. Iron, macronutrients and diatom blooms in teh Peru upwelling regime: brown and blue waters of Peru. Mar. Chem., 93: 81-103.
9		2000	-71.3353	-17.7792	2		0.03	SE Pacific		Bruland, KW, Rue, EL, Smith, GJ, DiTullio, GR, 2005. Iron, macronutrients and diatom blooms in teh Peru upwelling regime: brown and blue waters of Peru. Mar. Chem., 93: 81-103.
9		2000	-71.2598	-17.8045	2		0.08	SE Pacific		Bruland, KW, Rue, EL, Smith, GJ, DiTullio, GR, 2005. Iron, macronutrients and diatom blooms in teh Peru upwelling regime: brown and blue waters of Peru. Mar. Chem., 93: 81-103.
9		2000	-71.3295	-17.8525	2		0.03	SE Pacific		Bruland, KW, Rue, EL, Smith, GJ, DiTullio, GR, 2005. Iron, macronutrients and diatom blooms in teh Peru upwelling regime: brown and blue waters of Peru. Mar. Chem., 93: 81-103.
9		2000	-71.3489	-17.8642	2		0.03	SE Pacific		Bruland, KW, Rue, EL, Smith, GJ, DiTullio, GR, 2005. Iron, macronutrients and diatom blooms in teh Peru upwelling regime: brown and blue waters of Peru. Mar. Chem., 93: 81-103.
9		2000	-71.4319	-17.9252	2		0.03	SE Pacific		Bruland, KW, Rue, EL, Smith, GJ, DiTullio, GR, 2005. Iron, macronutrients and diatom blooms in teh Peru upwelling regime: brown and blue waters of Peru. Mar. Chem., 93: 81-103.
9		2000	-71.6226	-18.0627	2		0.03	SE Pacific		Bruland, KW, Rue, EL, Smith, GJ, DiTullio, GR, 2005. Iron, macronutrients and diatom blooms in teh Peru upwelling regime: brown and blue waters of Peru. Mar. Chem., 93: 81-103.
9		2000	-71.7356	-18.1437	2		0.03	SE Pacific		Bruland, KW, Rue, EL, Smith, GJ, DiTullio, GR, 2005. Iron, macronutrients and diatom blooms in teh Peru upwelling regime: brown and blue waters of Peru. Mar. Chem., 93: 81-103.
9		2000	-71.8776	-18.2456	2		0.03	SE Pacific		Bruland, KW, Rue, EL, Smith, GJ, DiTullio, GR, 2005. Iron, macronutrients and diatom blooms in teh Peru upwelling regime: brown and blue waters of Peru. Mar. Chem., 93: 81-103.
10	15	1995	71.8	-48.5	100	0	1.52	AntInd		Bucciarelli, E., S. Blain, and P. Treguer, 2001. Iron and manganese in the wake of the Kerguelen Islands (Southern Ocean). Mar. Chem. 73: 21-36.	six measurments not included as they were already in Blain et al., reference above.
10	15	1995	71.2	-48.7	100	0	1.75	AntInd		Bucciarelli, E., S. Blain, and P. Treguer, 2001. Iron and manganese in the wake of the Kerguelen Islands (Southern Ocean). Mar. Chem. 73: 21-36.
10	15	1995	73.6	-48	110	0	0.88	AntInd		Bucciarelli, E., S. Blain, and P. Treguer, 2001. Iron and manganese in the wake of the Kerguelen Islands (Southern Ocean). Mar. Chem. 73: 21-36.
10	15	1995	71.8	-49.2	110	0	0.26	AntInd		Bucciarelli, E., S. Blain, and P. Treguer, 2001. Iron and manganese in the wake of the Kerguelen Islands (Southern Ocean). Mar. Chem. 73: 21-36.
10	15	1995	72.7	-47.7	110	0	0.52	AntInd		Bucciarelli, E., S. Blain, and P. Treguer, 2001. Iron and manganese in the wake of the Kerguelen Islands (Southern Ocean). Mar. Chem. 73: 21-36.
10	15	1995	71.2	-48.7	150	0	1.31	AntInd		Bucciarelli, E., S. Blain, and P. Treguer, 2001. Iron and manganese in the wake of the Kerguelen Islands (Southern Ocean). Mar. Chem. 73: 21-36.
10	15	1995	71.8	-48.5	150	0	1.03	AntInd		Bucciarelli, E., S. Blain, and P. Treguer, 2001. Iron and manganese in the wake of the Kerguelen Islands (Southern Ocean). Mar. Chem. 73: 21-36.
10	15	1995	71.2	-48.7	200	0	1.84	AntInd		Bucciarelli, E., S. Blain, and P. Treguer, 2001. Iron and manganese in the wake of the Kerguelen Islands (Southern Ocean). Mar. Chem. 73: 21-36.
10	15	1995	71.8	-49.2	280	0	1.51	AntInd		Bucciarelli, E., S. Blain, and P. Treguer, 2001. Iron and manganese in the wake of the Kerguelen Islands (Southern Ocean). Mar. Chem. 73: 21-36.
10	15	1995	72.7	-47.7	280	0	0.86	AntInd		Bucciarelli, E., S. Blain, and P. Treguer, 2001. Iron and manganese in the wake of the Kerguelen Islands (Southern Ocean). Mar. Chem. 73: 21-36.
10	15	1995	71.8	-48.5	280	0	1.47	AntInd		Bucciarelli, E., S. Blain, and P. Treguer, 2001. Iron and manganese in the wake of the Kerguelen Islands (Southern Ocean). Mar. Chem. 73: 21-36.
10	15	1995	72.7	-48.5	280	0	1.94	AntInd		Bucciarelli, E., S. Blain, and P. Treguer, 2001. Iron and manganese in the wake of the Kerguelen Islands (Southern Ocean). Mar. Chem. 73: 21-36.
10	15	1995	73.6	-48	280	0	0.97	AntInd		Bucciarelli, E., S. Blain, and P. Treguer, 2001. Iron and manganese in the wake of the Kerguelen Islands (Southern Ocean). Mar. Chem. 73: 21-36.
7	1	1990	-140	0	20	0.05	0.0512	FeLine		Coale, K. H., Fitzwater, S. E., Gordon, R. M., Johnson, K. S. and Barber, R. T., 1996a. Control of community growth and export production by upwelled iron the equatorial Pacific Ocean. Nature, 379:621-624.
6	27	1990	-140	6	20	0.02	0.02048	FeLine		Coale, K. H., Fitzwater, S. E., Gordon, R. M., Johnson, K. S. and Barber, R. T., 1996a. Control of community growth and export production by upwelled iron the equatorial Pacific Ocean. Nature, 379:621-624.
6	26	1990	-140	9	20	0.06	0.06144	FeLine		Coale, K. H., Fitzwater, S. E., Gordon, R. M., Johnson, K. S. and Barber, R. T., 1996a. Control of community growth and export production by upwelled iron the equatorial Pacific Ocean. Nature, 379:621-624.
4	2	1992	-140	0	20	0.03	0.03072	EqPac		Coale, K. H., Fitzwater, S. E., Gordon, R. M., Johnson, K. S. and Barber, R. T., 1996a. Control of community growth and export production by upwelled iron the equatorial Pacific Ocean. Nature, 379:621-624.
10	3	1992	-140	0	20	0.03	0.03072	EqPac		Coale, K. H., Fitzwater, S. E., Gordon, R. M., Johnson, K. S. and Barber, R. T., 1996a. Control of community growth and export production by upwelled iron the equatorial Pacific Ocean. Nature, 379:621-624.
9	25	1992	-145.4	-12	20	0.03	0.03072	EqPac		Coale, K. H., Fitzwater, S. E., Gordon, R. M., Johnson, K. S. and Barber, R. T., 1996a. Control of community growth and export production by upwelled iron the equatorial Pacific Ocean. Nature, 379:621-624.
7	4	1990	-140	3	20	0.05	0.0512	FeLine		Coale, K. H., Fitzwater, S. E., Gordon, R. M., Johnson, K. S. and Barber, R. T., 1996a. Control of community growth and export production by upwelled iron the equatorial Pacific Ocean. Nature, 379:621-624.
7	7	1990	-140	-3	20	0.07	0.07168	FeLine		Coale, K. H., Fitzwater, S. E., Gordon, R. M., Johnson, K. S. and Barber, R. T., 1996a. Control of community growth and export production by upwelled iron the equatorial Pacific Ocean. Nature, 379:621-624.
3	25	1992	-140	0	20	0.03	0.03072	EqPac		Coale, K. H., Fitzwater, S. E., Gordon, R. M., Johnson, K. S. and Barber, R. T., 1996a. Control of community growth and export production by upwelled iron the equatorial Pacific Ocean. Nature, 379:621-624.
10	3	1992	-140	0	30	0.03	0.03072	EqPac		Coale, K. H., Fitzwater, S. E., Gordon, R. M., Johnson, K. S. and Barber, R. T., 1996a. Control of community growth and export production by upwelled iron the equatorial Pacific Ocean. Nature, 379:621-624.
6	26	1990	-140	9	40	0.08	0.08192	FeLine		Coale, K. H., Fitzwater, S. E., Gordon, R. M., Johnson, K. S. and Barber, R. T., 1996a. Control of community growth and export production by upwelled iron the equatorial Pacific Ocean. Nature, 379:621-624.
7	4	1990	-140	3	40	0.04	0.04096	FeLine		Coale, K. H., Fitzwater, S. E., Gordon, R. M., Johnson, K. S. and Barber, R. T., 1996a. Control of community growth and export production by upwelled iron the equatorial Pacific Ocean. Nature, 379:621-624.
6	27	1990	-140	6	40	0.06	0.06144	FeLine		Coale, K. H., Fitzwater, S. E., Gordon, R. M., Johnson, K. S. and Barber, R. T., 1996a. Control of community growth and export production by upwelled iron the equatorial Pacific Ocean. Nature, 379:621-624.
10	3	1992	-140	0	40	0.03	0.03072	EqPac		Coale, K. H., Fitzwater, S. E., Gordon, R. M., Johnson, K. S. and Barber, R. T., 1996a. Control of community growth and export production by upwelled iron the equatorial Pacific Ocean. Nature, 379:621-624.
7	1	1990	-140	0	40	0.04	0.04096	FeLine		Coale, K. H., Fitzwater, S. E., Gordon, R. M., Johnson, K. S. and Barber, R. T., 1996a. Control of community growth and export production by upwelled iron the equatorial Pacific Ocean. Nature, 379:621-624.
9	25	1992	-145.4	-12	40	0.03	0.03072	EqPac		Coale, K. H., Fitzwater, S. E., Gordon, R. M., Johnson, K. S. and Barber, R. T., 1996a. Control of community growth and export production by upwelled iron the equatorial Pacific Ocean. Nature, 379:621-624.
3	25	1992	-140	0	40	0.03	0.03072	EqPac		Coale, K. H., Fitzwater, S. E., Gordon, R. M., Johnson, K. S. and Barber, R. T., 1996a. Control of community growth and export production by upwelled iron the equatorial Pacific Ocean. Nature, 379:621-624.
4	2	1992	-140	0	40	0.03	0.03072	EqPac		Coale, K. H., Fitzwater, S. E., Gordon, R. M., Johnson, K. S. and Barber, R. T., 1996a. Control of community growth and export production by upwelled iron the equatorial Pacific Ocean. Nature, 379:621-624.
10	3	1992	-140	0	50	0.03	0.03072	EqPac		Coale, K. H., Fitzwater, S. E., Gordon, R. M., Johnson, K. S. and Barber, R. T., 1996a. Control of community growth and export production by upwelled iron the equatorial Pacific Ocean. Nature, 379:621-624.
10	3	1992	-140	0	60	0.03	0.03072	EqPac		Coale, K. H., Fitzwater, S. E., Gordon, R. M., Johnson, K. S. and Barber, R. T., 1996a. Control of community growth and export production by upwelled iron the equatorial Pacific Ocean. Nature, 379:621-624.
3	25	1992	-140	0	60	0.03	0.03072	EqPac		Coale, K. H., Fitzwater, S. E., Gordon, R. M., Johnson, K. S. and Barber, R. T., 1996a. Control of community growth and export production by upwelled iron the equatorial Pacific Ocean. Nature, 379:621-624.
6	26	1990	-140	9	60	0.03	0.03072	FeLine		Coale, K. H., Fitzwater, S. E., Gordon, R. M., Johnson, K. S. and Barber, R. T., 1996a. Control of community growth and export production by upwelled iron the equatorial Pacific Ocean. Nature, 379:621-624.
4	2	1992	-140	0	60	0.03	0.03072	EqPac		Coale, K. H., Fitzwater, S. E., Gordon, R. M., Johnson, K. S. and Barber, R. T., 1996a. Control of community growth and export production by upwelled iron the equatorial Pacific Ocean. Nature, 379:621-624.
6	27	1990	-140	6	60	0.02	0.02048	FeLine		Coale, K. H., Fitzwater, S. E., Gordon, R. M., Johnson, K. S. and Barber, R. T., 1996a. Control of community growth and export production by upwelled iron the equatorial Pacific Ocean. Nature, 379:621-624.
7	1	1990	-140	0	60	0.03	0.03072	FeLine		Coale, K. H., Fitzwater, S. E., Gordon, R. M., Johnson, K. S. and Barber, R. T., 1996a. Control of community growth and export production by upwelled iron the equatorial Pacific Ocean. Nature, 379:621-624.
9	25	1992	-145.4	-12	60	0.06	0.06144	EqPac		Coale, K. H., Fitzwater, S. E., Gordon, R. M., Johnson, K. S. and Barber, R. T., 1996a. Control of community growth and export production by upwelled iron the equatorial Pacific Ocean. Nature, 379:621-624.
7	4	1990	-140	3	60	0.06	0.06144	FeLine		Coale, K. H., Fitzwater, S. E., Gordon, R. M., Johnson, K. S. and Barber, R. T., 1996a. Control of community growth and export production by upwelled iron the equatorial Pacific Ocean. Nature, 379:621-624.
10	3	1992	-140	0	70	0.03	0.03072	EqPac		Coale, K. H., Fitzwater, S. E., Gordon, R. M., Johnson, K. S. and Barber, R. T., 1996a. Control of community growth and export production by upwelled iron the equatorial Pacific Ocean. Nature, 379:621-624.
7	4	1990	-140	3	80	0.04	0.04096	FeLine		Coale, K. H., Fitzwater, S. E., Gordon, R. M., Johnson, K. S. and Barber, R. T., 1996a. Control of community growth and export production by upwelled iron the equatorial Pacific Ocean. Nature, 379:621-624.
6	26	1990	-140	9	80	0.09	0.09216	FeLine		Coale, K. H., Fitzwater, S. E., Gordon, R. M., Johnson, K. S. and Barber, R. T., 1996a. Control of community growth and export production by upwelled iron the equatorial Pacific Ocean. Nature, 379:621-624.
6	27	1990	-140	6	80	0.04	0.04096	FeLine		Coale, K. H., Fitzwater, S. E., Gordon, R. M., Johnson, K. S. and Barber, R. T., 1996a. Control of community growth and export production by upwelled iron the equatorial Pacific Ocean. Nature, 379:621-624.
7	1	1990	-140	0	80	0.08	0.08192	FeLine		Coale, K. H., Fitzwater, S. E., Gordon, R. M., Johnson, K. S. and Barber, R. T., 1996a. Control of community growth and export production by upwelled iron the equatorial Pacific Ocean. Nature, 379:621-624.
3	25	1992	-140	0	80	0.03	0.03072	EqPac		Coale, K. H., Fitzwater, S. E., Gordon, R. M., Johnson, K. S. and Barber, R. T., 1996a. Control of community growth and export production by upwelled iron the equatorial Pacific Ocean. Nature, 379:621-624.
4	2	1992	-140	0	80	0.03	0.03072	EqPac		Coale, K. H., Fitzwater, S. E., Gordon, R. M., Johnson, K. S. and Barber, R. T., 1996a. Control of community growth and export production by upwelled iron the equatorial Pacific Ocean. Nature, 379:621-624.
10	3	1992	-140	0	80	0.03	0.03072	EqPac		Coale, K. H., Fitzwater, S. E., Gordon, R. M., Johnson, K. S. and Barber, R. T., 1996a. Control of community growth and export production by upwelled iron the equatorial Pacific Ocean. Nature, 379:621-624.
10	3	1992	-140	0	90	0.03	0.03072	EqPac		Coale, K. H., Fitzwater, S. E., Gordon, R. M., Johnson, K. S. and Barber, R. T., 1996a. Control of community growth and export production by upwelled iron the equatorial Pacific Ocean. Nature, 379:621-624.
9	25	1992	-145.4	-12	100	0.03	0.03072	EqPac		Coale, K. H., Fitzwater, S. E., Gordon, R. M., Johnson, K. S. and Barber, R. T., 1996a. Control of community growth and export production by upwelled iron the equatorial Pacific Ocean. Nature, 379:621-624.
7	7	1990	-140	-3	100	0.03	0.03072	FeLine		Coale, K. H., Fitzwater, S. E., Gordon, R. M., Johnson, K. S. and Barber, R. T., 1996a. Control of community growth and export production by upwelled iron the equatorial Pacific Ocean. Nature, 379:621-624.
4	2	1992	-140	0	100	0.03	0.03072	EqPac		Coale, K. H., Fitzwater, S. E., Gordon, R. M., Johnson, K. S. and Barber, R. T., 1996a. Control of community growth and export production by upwelled iron the equatorial Pacific Ocean. Nature, 379:621-624.
7	4	1990	-140	3	100	0.06	0.06144	FeLine		Coale, K. H., Fitzwater, S. E., Gordon, R. M., Johnson, K. S. and Barber, R. T., 1996a. Control of community growth and export production by upwelled iron the equatorial Pacific Ocean. Nature, 379:621-624.
10	3	1992	-140	0	100	0.04	0.04096	EqPac		Coale, K. H., Fitzwater, S. E., Gordon, R. M., Johnson, K. S. and Barber, R. T., 1996a. Control of community growth and export production by upwelled iron the equatorial Pacific Ocean. Nature, 379:621-624.
7	1	1990	-140	0	100	0.06	0.06144	FeLine		Coale, K. H., Fitzwater, S. E., Gordon, R. M., Johnson, K. S. and Barber, R. T., 1996a. Control of community growth and export production by upwelled iron the equatorial Pacific Ocean. Nature, 379:621-624.
3	25	1992	-140	0	100	0.03	0.03072	EqPac		Coale, K. H., Fitzwater, S. E., Gordon, R. M., Johnson, K. S. and Barber, R. T., 1996a. Control of community growth and export production by upwelled iron the equatorial Pacific Ocean. Nature, 379:621-624.
6	26	1990	-140	9	125	0.1	0.1024	FeLine		Coale, K. H., Fitzwater, S. E., Gordon, R. M., Johnson, K. S. and Barber, R. T., 1996a. Control of community growth and export production by upwelled iron the equatorial Pacific Ocean. Nature, 379:621-624.
7	4	1990	-140	3	125	0.12	0.12288	FeLine		Coale, K. H., Fitzwater, S. E., Gordon, R. M., Johnson, K. S. and Barber, R. T., 1996a. Control of community growth and export production by upwelled iron the equatorial Pacific Ocean. Nature, 379:621-624.
7	1	1990	-140	0	125	0.18	0.18432	FeLine		Coale, K. H., Fitzwater, S. E., Gordon, R. M., Johnson, K. S. and Barber, R. T., 1996a. Control of community growth and export production by upwelled iron the equatorial Pacific Ocean. Nature, 379:621-624.
10	3	1992	-140	0	125	0.1	0.1024	EqPac		Coale, K. H., Fitzwater, S. E., Gordon, R. M., Johnson, K. S. and Barber, R. T., 1996a. Control of community growth and export production by upwelled iron the equatorial Pacific Ocean. Nature, 379:621-624.
7	7	1990	-140	-3	125	0.06	0.06144	FeLine		Coale, K. H., Fitzwater, S. E., Gordon, R. M., Johnson, K. S. and Barber, R. T., 1996a. Control of community growth and export production by upwelled iron the equatorial Pacific Ocean. Nature, 379:621-624.
4	2	1992	-140	0	125	0.14	0.14336	EqPac		Coale, K. H., Fitzwater, S. E., Gordon, R. M., Johnson, K. S. and Barber, R. T., 1996a. Control of community growth and export production by upwelled iron the equatorial Pacific Ocean. Nature, 379:621-624.
6	27	1990	-140	6	125	0.04	0.04096	FeLine		Coale, K. H., Fitzwater, S. E., Gordon, R. M., Johnson, K. S. and Barber, R. T., 1996a. Control of community growth and export production by upwelled iron the equatorial Pacific Ocean. Nature, 379:621-624.
3	25	1992	-140	0	125	0.03	0.03072	EqPac		Coale, K. H., Fitzwater, S. E., Gordon, R. M., Johnson, K. S. and Barber, R. T., 1996a. Control of community growth and export production by upwelled iron the equatorial Pacific Ocean. Nature, 379:621-624.
10	3	1992	-140	0	150	0.12	0.12288	EqPac		Coale, K. H., Fitzwater, S. E., Gordon, R. M., Johnson, K. S. and Barber, R. T., 1996a. Control of community growth and export production by upwelled iron the equatorial Pacific Ocean. Nature, 379:621-624.
7	1	1990	-140	0	150	0.29	0.29696	FeLine		Coale, K. H., Fitzwater, S. E., Gordon, R. M., Johnson, K. S. and Barber, R. T., 1996a. Control of community growth and export production by upwelled iron the equatorial Pacific Ocean. Nature, 379:621-624.
6	26	1990	-140	9	150	0.22	0.22528	FeLine		Coale, K. H., Fitzwater, S. E., Gordon, R. M., Johnson, K. S. and Barber, R. T., 1996a. Control of community growth and export production by upwelled iron the equatorial Pacific Ocean. Nature, 379:621-624.
9	25	1992	-145.4	-12	150	0.03	0.03072	EqPac		Coale, K. H., Fitzwater, S. E., Gordon, R. M., Johnson, K. S. and Barber, R. T., 1996a. Control of community growth and export production by upwelled iron the equatorial Pacific Ocean. Nature, 379:621-624.
6	27	1990	-140	6	150	0.19	0.19456	FeLine		Coale, K. H., Fitzwater, S. E., Gordon, R. M., Johnson, K. S. and Barber, R. T., 1996a. Control of community growth and export production by upwelled iron the equatorial Pacific Ocean. Nature, 379:621-624.
3	25	1992	-140	0	150	0.2	0.2048	EqPac		Coale, K. H., Fitzwater, S. E., Gordon, R. M., Johnson, K. S. and Barber, R. T., 1996a. Control of community growth and export production by upwelled iron the equatorial Pacific Ocean. Nature, 379:621-624.
7	7	1990	-140	-3	150	0.04	0.04096	FeLine		Coale, K. H., Fitzwater, S. E., Gordon, R. M., Johnson, K. S. and Barber, R. T., 1996a. Control of community growth and export production by upwelled iron the equatorial Pacific Ocean. Nature, 379:621-624.
4	2	1992	-140	0	150	0.12	0.12288	EqPac		Coale, K. H., Fitzwater, S. E., Gordon, R. M., Johnson, K. S. and Barber, R. T., 1996a. Control of community growth and export production by upwelled iron the equatorial Pacific Ocean. Nature, 379:621-624.
7	4	1990	-140	3	150	0.21	0.21504	FeLine		Coale, K. H., Fitzwater, S. E., Gordon, R. M., Johnson, K. S. and Barber, R. T., 1996a. Control of community growth and export production by upwelled iron the equatorial Pacific Ocean. Nature, 379:621-624.
3	25	1992	-140	0	175	0.23	0.23552	EqPac		Coale, K. H., Fitzwater, S. E., Gordon, R. M., Johnson, K. S. and Barber, R. T., 1996a. Control of community growth and export production by upwelled iron the equatorial Pacific Ocean. Nature, 379:621-624.
7	4	1990	-140	3	175	0.22	0.22528	FeLine		Coale, K. H., Fitzwater, S. E., Gordon, R. M., Johnson, K. S. and Barber, R. T., 1996a. Control of community growth and export production by upwelled iron the equatorial Pacific Ocean. Nature, 379:621-624.
7	7	1990	-140	-3	175	0.1	0.1024	FeLine		Coale, K. H., Fitzwater, S. E., Gordon, R. M., Johnson, K. S. and Barber, R. T., 1996a. Control of community growth and export production by upwelled iron the equatorial Pacific Ocean. Nature, 379:621-624.
6	27	1990	-140	6	175	0.18	0.18432	FeLine		Coale, K. H., Fitzwater, S. E., Gordon, R. M., Johnson, K. S. and Barber, R. T., 1996a. Control of community growth and export production by upwelled iron the equatorial Pacific Ocean. Nature, 379:621-624.
10	3	1992	-140	0	175	0.18	0.18432	EqPac		Coale, K. H., Fitzwater, S. E., Gordon, R. M., Johnson, K. S. and Barber, R. T., 1996a. Control of community growth and export production by upwelled iron the equatorial Pacific Ocean. Nature, 379:621-624.
7	1	1990	-140	0	175	0.28	0.28672	FeLine		Coale, K. H., Fitzwater, S. E., Gordon, R. M., Johnson, K. S. and Barber, R. T., 1996a. Control of community growth and export production by upwelled iron the equatorial Pacific Ocean. Nature, 379:621-624.
4	2	1992	-140	0	175	0.27	0.27648	EqPac		Coale, K. H., Fitzwater, S. E., Gordon, R. M., Johnson, K. S. and Barber, R. T., 1996a. Control of community growth and export production by upwelled iron the equatorial Pacific Ocean. Nature, 379:621-624.
6	27	1990	-140	6	200	0.23	0.23552	FeLine		Coale, K. H., Fitzwater, S. E., Gordon, R. M., Johnson, K. S. and Barber, R. T., 1996a. Control of community growth and export production by upwelled iron the equatorial Pacific Ocean. Nature, 379:621-624.
9	25	1992	-145.4	-12	200	0.03	0.03072	EqPac		Coale, K. H., Fitzwater, S. E., Gordon, R. M., Johnson, K. S. and Barber, R. T., 1996a. Control of community growth and export production by upwelled iron the equatorial Pacific Ocean. Nature, 379:621-624.
4	2	1992	-140	0	200	0.29	0.29696	EqPac		Coale, K. H., Fitzwater, S. E., Gordon, R. M., Johnson, K. S. and Barber, R. T., 1996a. Control of community growth and export production by upwelled iron the equatorial Pacific Ocean. Nature, 379:621-624.
10	3	1992	-140	0	200	0.26	0.26624	EqPac		Coale, K. H., Fitzwater, S. E., Gordon, R. M., Johnson, K. S. and Barber, R. T., 1996a. Control of community growth and export production by upwelled iron the equatorial Pacific Ocean. Nature, 379:621-624.
3	25	1992	-140	0	200	0.25	0.256	EqPac		Coale, K. H., Fitzwater, S. E., Gordon, R. M., Johnson, K. S. and Barber, R. T., 1996a. Control of community growth and export production by upwelled iron the equatorial Pacific Ocean. Nature, 379:621-624.
7	4	1990	-140	3	200	0.36	0.36864	FeLine		Coale, K. H., Fitzwater, S. E., Gordon, R. M., Johnson, K. S. and Barber, R. T., 1996a. Control of community growth and export production by upwelled iron the equatorial Pacific Ocean. Nature, 379:621-624.
7	1	1990	-140	0	200	0.39	0.39936	FeLine		Coale, K. H., Fitzwater, S. E., Gordon, R. M., Johnson, K. S. and Barber, R. T., 1996a. Control of community growth and export production by upwelled iron the equatorial Pacific Ocean. Nature, 379:621-624.
7	7	1990	-140	-3	250	0.2	0.2048	FeLine		Coale, K. H., Fitzwater, S. E., Gordon, R. M., Johnson, K. S. and Barber, R. T., 1996a. Control of community growth and export production by upwelled iron the equatorial Pacific Ocean. Nature, 379:621-624.
7	4	1990	-140	3	250	0.26	0.26624	FeLine		Coale, K. H., Fitzwater, S. E., Gordon, R. M., Johnson, K. S. and Barber, R. T., 1996a. Control of community growth and export production by upwelled iron the equatorial Pacific Ocean. Nature, 379:621-624.
10	3	1992	-140	0	250	0.28	0.28672	EqPac		Coale, K. H., Fitzwater, S. E., Gordon, R. M., Johnson, K. S. and Barber, R. T., 1996a. Control of community growth and export production by upwelled iron the equatorial Pacific Ocean. Nature, 379:621-624.
9	25	1992	-145.4	-12	250	0.03	0.03072	EqPac		Coale, K. H., Fitzwater, S. E., Gordon, R. M., Johnson, K. S. and Barber, R. T., 1996a. Control of community growth and export production by upwelled iron the equatorial Pacific Ocean. Nature, 379:621-624.
6	26	1990	-140	9	250	0.38	0.38912	FeLine		Coale, K. H., Fitzwater, S. E., Gordon, R. M., Johnson, K. S. and Barber, R. T., 1996a. Control of community growth and export production by upwelled iron the equatorial Pacific Ocean. Nature, 379:621-624.
3	25	1992	-140	0	250	0.22	0.22528	EqPac		Coale, K. H., Fitzwater, S. E., Gordon, R. M., Johnson, K. S. and Barber, R. T., 1996a. Control of community growth and export production by upwelled iron the equatorial Pacific Ocean. Nature, 379:621-624.
4	2	1992	-140	0	250	0.28	0.28672	EqPac		Coale, K. H., Fitzwater, S. E., Gordon, R. M., Johnson, K. S. and Barber, R. T., 1996a. Control of community growth and export production by upwelled iron the equatorial Pacific Ocean. Nature, 379:621-624.
6	27	1990	-140	6	250	0.35	0.3584	FeLine		Coale, K. H., Fitzwater, S. E., Gordon, R. M., Johnson, K. S. and Barber, R. T., 1996a. Control of community growth and export production by upwelled iron the equatorial Pacific Ocean. Nature, 379:621-624.
7	1	1990	-140	0	250	0.27	0.27648	FeLine		Coale, K. H., Fitzwater, S. E., Gordon, R. M., Johnson, K. S. and Barber, R. T., 1996a. Control of community growth and export production by upwelled iron the equatorial Pacific Ocean. Nature, 379:621-624.
9	25	1992	-145.4	-12	300	0.08	0.08192	EqPac		Coale, K. H., Fitzwater, S. E., Gordon, R. M., Johnson, K. S. and Barber, R. T., 1996a. Control of community growth and export production by upwelled iron the equatorial Pacific Ocean. Nature, 379:621-624.
3	25	1992	-140	0	300	0.2	0.2048	EqPac		Coale, K. H., Fitzwater, S. E., Gordon, R. M., Johnson, K. S. and Barber, R. T., 1996a. Control of community growth and export production by upwelled iron the equatorial Pacific Ocean. Nature, 379:621-624.
10	3	1992	-140	0	300	0.27	0.27648	EqPac		Coale, K. H., Fitzwater, S. E., Gordon, R. M., Johnson, K. S. and Barber, R. T., 1996a. Control of community growth and export production by upwelled iron the equatorial Pacific Ocean. Nature, 379:621-624.
4	2	1992	-140	0	300	0.22	0.22528	EqPac		Coale, K. H., Fitzwater, S. E., Gordon, R. M., Johnson, K. S. and Barber, R. T., 1996a. Control of community growth and export production by upwelled iron the equatorial Pacific Ocean. Nature, 379:621-624.
10	3	1992	-140	0	350	0.32	0.32768	EqPac		Coale, K. H., Fitzwater, S. E., Gordon, R. M., Johnson, K. S. and Barber, R. T., 1996a. Control of community growth and export production by upwelled iron the equatorial Pacific Ocean. Nature, 379:621-624.
4	2	1992	-140	0	350	0.28	0.28672	EqPac		Coale, K. H., Fitzwater, S. E., Gordon, R. M., Johnson, K. S. and Barber, R. T., 1996a. Control of community growth and export production by upwelled iron the equatorial Pacific Ocean. Nature, 379:621-624.
3	25	1992	-140	0	350	0.32	0.32768	EqPac		Coale, K. H., Fitzwater, S. E., Gordon, R. M., Johnson, K. S. and Barber, R. T., 1996a. Control of community growth and export production by upwelled iron the equatorial Pacific Ocean. Nature, 379:621-624.
7	7	1990	-140	-3	500	0.34	0.34816	FeLine		Coale, K. H., Fitzwater, S. E., Gordon, R. M., Johnson, K. S. and Barber, R. T., 1996a. Control of community growth and export production by upwelled iron the equatorial Pacific Ocean. Nature, 379:621-624.
7	7	1990	-140	-3	1000	0.38	0.38912	FeLine		Coale, K. H., Fitzwater, S. E., Gordon, R. M., Johnson, K. S. and Barber, R. T., 1996a. Control of community growth and export production by upwelled iron the equatorial Pacific Ocean. Nature, 379:621-624.
7	7	1990	-140	-3	1600	0.45	0.4608	FeLine		Coale, K. H., Fitzwater, S. E., Gordon, R. M., Johnson, K. S. and Barber, R. T., 1996a. Control of community growth and export production by upwelled iron the equatorial Pacific Ocean. Nature, 379:621-624.
7	7	1990	-140	-3	2000	0.49	0.50176	FeLine		Coale, K. H., Fitzwater, S. E., Gordon, R. M., Johnson, K. S. and Barber, R. T., 1996a. Control of community growth and export production by upwelled iron the equatorial Pacific Ocean. Nature, 379:621-624.
7	7	1990	-140	-3	2400	0.55	0.5632	FeLine		Coale, K. H., Fitzwater, S. E., Gordon, R. M., Johnson, K. S. and Barber, R. T., 1996a. Control of community growth and export production by upwelled iron the equatorial Pacific Ocean. Nature, 379:621-624.
10		1997	-170	-62.2	50	0.09	0.09216	SO/AESOPS		Coale, KH, Gordon, RM, Wang, X, 2005. The distribution and behavior of dissolved and particulate iron and zinc in the Ross Sea and Antarctic Circumpolar Current along 170oW. Deep-Sea Res. I, 52: 295-318.
11		1997	-170	-62.2	100	0.04	0.04096	SO/AESOPS		Coale, KH, Gordon, RM, Wang, X, 2005. The distribution and behavior of dissolved and particulate iron and zinc in the Ross Sea and Antarctic Circumpolar Current along 170oW. Deep-Sea Res. I, 52: 295-318.
11		1997	-170	-62.2	200	0.22	0.22528	SO/AESOPS		Coale, KH, Gordon, RM, Wang, X, 2005. The distribution and behavior of dissolved and particulate iron and zinc in the Ross Sea and Antarctic Circumpolar Current along 170oW. Deep-Sea Res. I, 52: 295-318.
11		1997	-170	-62.2	480	0.26	0.26624	SO/AESOPS		Coale, KH, Gordon, RM, Wang, X, 2005. The distribution and behavior of dissolved and particulate iron and zinc in the Ross Sea and Antarctic Circumpolar Current along 170oW. Deep-Sea Res. I, 52: 295-318.
11		1997	-170	-62.2	1000	0.34	0.34816	SO/AESOPS		Coale, KH, Gordon, RM, Wang, X, 2005. The distribution and behavior of dissolved and particulate iron and zinc in the Ross Sea and Antarctic Circumpolar Current along 170oW. Deep-Sea Res. I, 52: 295-318.
11		1997	-168	-60.8	40	0.03	0.03072	SO/AESOPS		Coale, KH, Gordon, RM, Wang, X, 2005. The distribution and behavior of dissolved and particulate iron and zinc in the Ross Sea and Antarctic Circumpolar Current along 170oW. Deep-Sea Res. I, 52: 295-318.
11		1997	-168	-60.8	80	0.03	0.03072	SO/AESOPS		Coale, KH, Gordon, RM, Wang, X, 2005. The distribution and behavior of dissolved and particulate iron and zinc in the Ross Sea and Antarctic Circumpolar Current along 170oW. Deep-Sea Res. I, 52: 295-318.
11		1997	-168	-60.8	200	0.06	0.06144	SO/AESOPS		Coale, KH, Gordon, RM, Wang, X, 2005. The distribution and behavior of dissolved and particulate iron and zinc in the Ross Sea and Antarctic Circumpolar Current along 170oW. Deep-Sea Res. I, 52: 295-318.
11		1997	-168	-60.8	300	0.08	0.08192	SO/AESOPS		Coale, KH, Gordon, RM, Wang, X, 2005. The distribution and behavior of dissolved and particulate iron and zinc in the Ross Sea and Antarctic Circumpolar Current along 170oW. Deep-Sea Res. I, 52: 295-318.
11		1997	-168	-60.8	490	0.24	0.24576	SO/AESOPS		Coale, KH, Gordon, RM, Wang, X, 2005. The distribution and behavior of dissolved and particulate iron and zinc in the Ross Sea and Antarctic Circumpolar Current along 170oW. Deep-Sea Res. I, 52: 295-318.
11		1997	-168	-60.8	970	0.28	0.28672	SO/AESOPS		Coale, KH, Gordon, RM, Wang, X, 2005. The distribution and behavior of dissolved and particulate iron and zinc in the Ross Sea and Antarctic Circumpolar Current along 170oW. Deep-Sea Res. I, 52: 295-318.
11		1997	-169.5	-60.5	50	0.03	0.03072	SO/AESOPS		Coale, KH, Gordon, RM, Wang, X, 2005. The distribution and behavior of dissolved and particulate iron and zinc in the Ross Sea and Antarctic Circumpolar Current along 170oW. Deep-Sea Res. I, 52: 295-318.
11		1997	-169.5	-60.5	100	0.03	0.03072	SO/AESOPS		Coale, KH, Gordon, RM, Wang, X, 2005. The distribution and behavior of dissolved and particulate iron and zinc in the Ross Sea and Antarctic Circumpolar Current along 170oW. Deep-Sea Res. I, 52: 295-318.
11		1997	-169.5	-60.5	200	0.04	0.04096	SO/AESOPS		Coale, KH, Gordon, RM, Wang, X, 2005. The distribution and behavior of dissolved and particulate iron and zinc in the Ross Sea and Antarctic Circumpolar Current along 170oW. Deep-Sea Res. I, 52: 295-318.
11		1997	-169.5	-60.5	220	0.1	0.1024	SO/AESOPS		Coale, KH, Gordon, RM, Wang, X, 2005. The distribution and behavior of dissolved and particulate iron and zinc in the Ross Sea and Antarctic Circumpolar Current along 170oW. Deep-Sea Res. I, 52: 295-318.
11		1997	-169.5	-60.5	500	0.35	0.3584	SO/AESOPS		Coale, KH, Gordon, RM, Wang, X, 2005. The distribution and behavior of dissolved and particulate iron and zinc in the Ross Sea and Antarctic Circumpolar Current along 170oW. Deep-Sea Res. I, 52: 295-318.
11		1997	-169.5	-60.5	1000	0.25	0.256	SO/AESOPS		Coale, KH, Gordon, RM, Wang, X, 2005. The distribution and behavior of dissolved and particulate iron and zinc in the Ross Sea and Antarctic Circumpolar Current along 170oW. Deep-Sea Res. I, 52: 295-318.
11		1997	-169.5	-60.5	1500	0.3	0.3072	SO/AESOPS		Coale, KH, Gordon, RM, Wang, X, 2005. The distribution and behavior of dissolved and particulate iron and zinc in the Ross Sea and Antarctic Circumpolar Current along 170oW. Deep-Sea Res. I, 52: 295-318.
11		1997	-169.5	-60.5	2000	0.39	0.39936	SO/AESOPS		Coale, KH, Gordon, RM, Wang, X, 2005. The distribution and behavior of dissolved and particulate iron and zinc in the Ross Sea and Antarctic Circumpolar Current along 170oW. Deep-Sea Res. I, 52: 295-318.
11		1997	-170	-60.2	50	0.03	0.03072	SO/AESOPS		Coale, KH, Gordon, RM, Wang, X, 2005. The distribution and behavior of dissolved and particulate iron and zinc in the Ross Sea and Antarctic Circumpolar Current along 170oW. Deep-Sea Res. I, 52: 295-318.
11		1997	-170	-60.2	100	0.03	0.03072	SO/AESOPS		Coale, KH, Gordon, RM, Wang, X, 2005. The distribution and behavior of dissolved and particulate iron and zinc in the Ross Sea and Antarctic Circumpolar Current along 170oW. Deep-Sea Res. I, 52: 295-318.
11		1997	-170	-60.2	200	0.03	0.03072	SO/AESOPS		Coale, KH, Gordon, RM, Wang, X, 2005. The distribution and behavior of dissolved and particulate iron and zinc in the Ross Sea and Antarctic Circumpolar Current along 170oW. Deep-Sea Res. I, 52: 295-318.
11		1997	-170	-60.2	280	0.03	0.03072	SO/AESOPS		Coale, KH, Gordon, RM, Wang, X, 2005. The distribution and behavior of dissolved and particulate iron and zinc in the Ross Sea and Antarctic Circumpolar Current along 170oW. Deep-Sea Res. I, 52: 295-318.
11		1997	-170	-60.2	520	0.24	0.24576	SO/AESOPS		Coale, KH, Gordon, RM, Wang, X, 2005. The distribution and behavior of dissolved and particulate iron and zinc in the Ross Sea and Antarctic Circumpolar Current along 170oW. Deep-Sea Res. I, 52: 295-318.
11		1997	-170	-60.2	1000	0.32	0.32768	SO/AESOPS		Coale, KH, Gordon, RM, Wang, X, 2005. The distribution and behavior of dissolved and particulate iron and zinc in the Ross Sea and Antarctic Circumpolar Current along 170oW. Deep-Sea Res. I, 52: 295-318.
11		1997	-170	-59.2	50	0.05	0.0512	SO/AESOPS		Coale, KH, Gordon, RM, Wang, X, 2005. The distribution and behavior of dissolved and particulate iron and zinc in the Ross Sea and Antarctic Circumpolar Current along 170oW. Deep-Sea Res. I, 52: 295-318.
11		1997	-170	-59.2	100	0.09	0.09216	SO/AESOPS		Coale, KH, Gordon, RM, Wang, X, 2005. The distribution and behavior of dissolved and particulate iron and zinc in the Ross Sea and Antarctic Circumpolar Current along 170oW. Deep-Sea Res. I, 52: 295-318.
11		1997	-170	-59.2	200	0.06	0.06144	SO/AESOPS		Coale, KH, Gordon, RM, Wang, X, 2005. The distribution and behavior of dissolved and particulate iron and zinc in the Ross Sea and Antarctic Circumpolar Current along 170oW. Deep-Sea Res. I, 52: 295-318.
11		1997	-170	-59.2	310	0.21	0.21504	SO/AESOPS		Coale, KH, Gordon, RM, Wang, X, 2005. The distribution and behavior of dissolved and particulate iron and zinc in the Ross Sea and Antarctic Circumpolar Current along 170oW. Deep-Sea Res. I, 52: 295-318.
11		1997	-170	-59.2	500	0.28	0.28672	SO/AESOPS		Coale, KH, Gordon, RM, Wang, X, 2005. The distribution and behavior of dissolved and particulate iron and zinc in the Ross Sea and Antarctic Circumpolar Current along 170oW. Deep-Sea Res. I, 52: 295-318.
11		1997	-170	-59.2	970	0.31	0.31744	SO/AESOPS		Coale, KH, Gordon, RM, Wang, X, 2005. The distribution and behavior of dissolved and particulate iron and zinc in the Ross Sea and Antarctic Circumpolar Current along 170oW. Deep-Sea Res. I, 52: 295-318.
11		1997	-170	-59.2	1460	0.39	0.39936	SO/AESOPS		Coale, KH, Gordon, RM, Wang, X, 2005. The distribution and behavior of dissolved and particulate iron and zinc in the Ross Sea and Antarctic Circumpolar Current along 170oW. Deep-Sea Res. I, 52: 295-318.
11		1997	-170	-59.2	1900	0.55	0.5632	SO/AESOPS		Coale, KH, Gordon, RM, Wang, X, 2005. The distribution and behavior of dissolved and particulate iron and zinc in the Ross Sea and Antarctic Circumpolar Current along 170oW. Deep-Sea Res. I, 52: 295-318.
11		1997	-170	-57	150	0.26	0.26624	SO/AESOPS		Coale, KH, Gordon, RM, Wang, X, 2005. The distribution and behavior of dissolved and particulate iron and zinc in the Ross Sea and Antarctic Circumpolar Current along 170oW. Deep-Sea Res. I, 52: 295-318.
11		1997	-170	-57	500	0.29	0.29696	SO/AESOPS		Coale, KH, Gordon, RM, Wang, X, 2005. The distribution and behavior of dissolved and particulate iron and zinc in the Ross Sea and Antarctic Circumpolar Current along 170oW. Deep-Sea Res. I, 52: 295-318.
1		1998	-170	-57	18	0.025	0.0256	SO/AESOPS		Coale, KH, Gordon, RM, Wang, X, 2005. The distribution and behavior of dissolved and particulate iron and zinc in the Ross Sea and Antarctic Circumpolar Current along 170oW. Deep-Sea Res. I, 52: 295-318.
1		1998	-170	-57	40	0.025	0.0256	SO/AESOPS		Coale, KH, Gordon, RM, Wang, X, 2005. The distribution and behavior of dissolved and particulate iron and zinc in the Ross Sea and Antarctic Circumpolar Current along 170oW. Deep-Sea Res. I, 52: 295-318.
1		1998	-170	-57	60	0.04	0.04096	SO/AESOPS		Coale, KH, Gordon, RM, Wang, X, 2005. The distribution and behavior of dissolved and particulate iron and zinc in the Ross Sea and Antarctic Circumpolar Current along 170oW. Deep-Sea Res. I, 52: 295-318.
1		1998	-170	-57	100	0.03	0.03072	SO/AESOPS		Coale, KH, Gordon, RM, Wang, X, 2005. The distribution and behavior of dissolved and particulate iron and zinc in the Ross Sea and Antarctic Circumpolar Current along 170oW. Deep-Sea Res. I, 52: 295-318.
1		1998	-170	-57	150	0.16	0.16384	SO/AESOPS		Coale, KH, Gordon, RM, Wang, X, 2005. The distribution and behavior of dissolved and particulate iron and zinc in the Ross Sea and Antarctic Circumpolar Current along 170oW. Deep-Sea Res. I, 52: 295-318.
1		1998	-170	-57	200	0.2	0.2048	SO/AESOPS		Coale, KH, Gordon, RM, Wang, X, 2005. The distribution and behavior of dissolved and particulate iron and zinc in the Ross Sea and Antarctic Circumpolar Current along 170oW. Deep-Sea Res. I, 52: 295-318.
1		1998	-170	-57	300	0.24	0.24576	SO/AESOPS		Coale, KH, Gordon, RM, Wang, X, 2005. The distribution and behavior of dissolved and particulate iron and zinc in the Ross Sea and Antarctic Circumpolar Current along 170oW. Deep-Sea Res. I, 52: 295-318.
1		1998	-170	-57	480	0.28	0.28672	SO/AESOPS		Coale, KH, Gordon, RM, Wang, X, 2005. The distribution and behavior of dissolved and particulate iron and zinc in the Ross Sea and Antarctic Circumpolar Current along 170oW. Deep-Sea Res. I, 52: 295-318.
1		1998	-170	-65	20	0.03	0.03072	SO/AESOPS		Coale, KH, Gordon, RM, Wang, X, 2005. The distribution and behavior of dissolved and particulate iron and zinc in the Ross Sea and Antarctic Circumpolar Current along 170oW. Deep-Sea Res. I, 52: 295-318.
1		1998	-170	-65	40	0.03	0.03072	SO/AESOPS		Coale, KH, Gordon, RM, Wang, X, 2005. The distribution and behavior of dissolved and particulate iron and zinc in the Ross Sea and Antarctic Circumpolar Current along 170oW. Deep-Sea Res. I, 52: 295-318.
1		1998	-170	-65	60	0.03	0.03072	SO/AESOPS		Coale, KH, Gordon, RM, Wang, X, 2005. The distribution and behavior of dissolved and particulate iron and zinc in the Ross Sea and Antarctic Circumpolar Current along 170oW. Deep-Sea Res. I, 52: 295-318.
1		1998	-170	-65	100	0.04	0.04096	SO/AESOPS		Coale, KH, Gordon, RM, Wang, X, 2005. The distribution and behavior of dissolved and particulate iron and zinc in the Ross Sea and Antarctic Circumpolar Current along 170oW. Deep-Sea Res. I, 52: 295-318.
1		1998	-170	-65	150	0.09	0.09216	SO/AESOPS		Coale, KH, Gordon, RM, Wang, X, 2005. The distribution and behavior of dissolved and particulate iron and zinc in the Ross Sea and Antarctic Circumpolar Current along 170oW. Deep-Sea Res. I, 52: 295-318.
1		1998	-170	-65	200	0.16	0.16384	SO/AESOPS		Coale, KH, Gordon, RM, Wang, X, 2005. The distribution and behavior of dissolved and particulate iron and zinc in the Ross Sea and Antarctic Circumpolar Current along 170oW. Deep-Sea Res. I, 52: 295-318.
1		1998	-170	-65	300	0.16	0.16384	SO/AESOPS		Coale, KH, Gordon, RM, Wang, X, 2005. The distribution and behavior of dissolved and particulate iron and zinc in the Ross Sea and Antarctic Circumpolar Current along 170oW. Deep-Sea Res. I, 52: 295-318.
1		1998	-170	-65	500	0.21	0.21504	SO/AESOPS		Coale, KH, Gordon, RM, Wang, X, 2005. The distribution and behavior of dissolved and particulate iron and zinc in the Ross Sea and Antarctic Circumpolar Current along 170oW. Deep-Sea Res. I, 52: 295-318.
1		1998	-170	-64.5	25	0.03	0.03072	SO/AESOPS		Coale, KH, Gordon, RM, Wang, X, 2005. The distribution and behavior of dissolved and particulate iron and zinc in the Ross Sea and Antarctic Circumpolar Current along 170oW. Deep-Sea Res. I, 52: 295-318.
1		1998	-170	-64.5	50	0.03	0.03072	SO/AESOPS		Coale, KH, Gordon, RM, Wang, X, 2005. The distribution and behavior of dissolved and particulate iron and zinc in the Ross Sea and Antarctic Circumpolar Current along 170oW. Deep-Sea Res. I, 52: 295-318.
1		1998	-170	-64.5	75	0.03	0.03072	SO/AESOPS		Coale, KH, Gordon, RM, Wang, X, 2005. The distribution and behavior of dissolved and particulate iron and zinc in the Ross Sea and Antarctic Circumpolar Current along 170oW. Deep-Sea Res. I, 52: 295-318.
1		1998	-170	-64.5	100	0.09	0.09216	SO/AESOPS		Coale, KH, Gordon, RM, Wang, X, 2005. The distribution and behavior of dissolved and particulate iron and zinc in the Ross Sea and Antarctic Circumpolar Current along 170oW. Deep-Sea Res. I, 52: 295-318.
1		1998	-170	-64.5	150	0.12	0.12288	SO/AESOPS		Coale, KH, Gordon, RM, Wang, X, 2005. The distribution and behavior of dissolved and particulate iron and zinc in the Ross Sea and Antarctic Circumpolar Current along 170oW. Deep-Sea Res. I, 52: 295-318.
1		1998	-170	-64.5	200	0.18	0.18432	SO/AESOPS		Coale, KH, Gordon, RM, Wang, X, 2005. The distribution and behavior of dissolved and particulate iron and zinc in the Ross Sea and Antarctic Circumpolar Current along 170oW. Deep-Sea Res. I, 52: 295-318.
1		1998	-170	-64.5	300	0.2	0.2048	SO/AESOPS		Coale, KH, Gordon, RM, Wang, X, 2005. The distribution and behavior of dissolved and particulate iron and zinc in the Ross Sea and Antarctic Circumpolar Current along 170oW. Deep-Sea Res. I, 52: 295-318.
1		1998	-170	-64.5	490	0.23	0.23552	SO/AESOPS		Coale, KH, Gordon, RM, Wang, X, 2005. The distribution and behavior of dissolved and particulate iron and zinc in the Ross Sea and Antarctic Circumpolar Current along 170oW. Deep-Sea Res. I, 52: 295-318.
1		1998	-170	-62.5	20	0.11	0.11264	SO/AESOPS		Coale, KH, Gordon, RM, Wang, X, 2005. The distribution and behavior of dissolved and particulate iron and zinc in the Ross Sea and Antarctic Circumpolar Current along 170oW. Deep-Sea Res. I, 52: 295-318.
1		1998	-170	-62.5	40	0.025	0.0256	SO/AESOPS		Coale, KH, Gordon, RM, Wang, X, 2005. The distribution and behavior of dissolved and particulate iron and zinc in the Ross Sea and Antarctic Circumpolar Current along 170oW. Deep-Sea Res. I, 52: 295-318.
1		1998	-170	-62.5	60	0.025	0.0256	SO/AESOPS		Coale, KH, Gordon, RM, Wang, X, 2005. The distribution and behavior of dissolved and particulate iron and zinc in the Ross Sea and Antarctic Circumpolar Current along 170oW. Deep-Sea Res. I, 52: 295-318.
1		1998	-170	-62.5	100	0.025	0.0256	SO/AESOPS		Coale, KH, Gordon, RM, Wang, X, 2005. The distribution and behavior of dissolved and particulate iron and zinc in the Ross Sea and Antarctic Circumpolar Current along 170oW. Deep-Sea Res. I, 52: 295-318.
1		1998	-170	-62.5	150	0.06	0.06144	SO/AESOPS		Coale, KH, Gordon, RM, Wang, X, 2005. The distribution and behavior of dissolved and particulate iron and zinc in the Ross Sea and Antarctic Circumpolar Current along 170oW. Deep-Sea Res. I, 52: 295-318.
1		1998	-170	-62.5	200	0.1	0.1024	SO/AESOPS		Coale, KH, Gordon, RM, Wang, X, 2005. The distribution and behavior of dissolved and particulate iron and zinc in the Ross Sea and Antarctic Circumpolar Current along 170oW. Deep-Sea Res. I, 52: 295-318.
1		1998	-170	-62.5	300	0.18	0.18432	SO/AESOPS		Coale, KH, Gordon, RM, Wang, X, 2005. The distribution and behavior of dissolved and particulate iron and zinc in the Ross Sea and Antarctic Circumpolar Current along 170oW. Deep-Sea Res. I, 52: 295-318.
1		1998	-170	-62.5	500	0.25	0.256	SO/AESOPS		Coale, KH, Gordon, RM, Wang, X, 2005. The distribution and behavior of dissolved and particulate iron and zinc in the Ross Sea and Antarctic Circumpolar Current along 170oW. Deep-Sea Res. I, 52: 295-318.
1		1998	-170	-61	25	0.03	0.03072	SO/AESOPS		Coale, KH, Gordon, RM, Wang, X, 2005. The distribution and behavior of dissolved and particulate iron and zinc in the Ross Sea and Antarctic Circumpolar Current along 170oW. Deep-Sea Res. I, 52: 295-318.
1		1998	-170	-61	50	0.03	0.03072	SO/AESOPS		Coale, KH, Gordon, RM, Wang, X, 2005. The distribution and behavior of dissolved and particulate iron and zinc in the Ross Sea and Antarctic Circumpolar Current along 170oW. Deep-Sea Res. I, 52: 295-318.
1		1998	-170	-61	75	0.03	0.03072	SO/AESOPS		Coale, KH, Gordon, RM, Wang, X, 2005. The distribution and behavior of dissolved and particulate iron and zinc in the Ross Sea and Antarctic Circumpolar Current along 170oW. Deep-Sea Res. I, 52: 295-318.
1		1998	-170	-61	100	0.03	0.03072	SO/AESOPS		Coale, KH, Gordon, RM, Wang, X, 2005. The distribution and behavior of dissolved and particulate iron and zinc in the Ross Sea and Antarctic Circumpolar Current along 170oW. Deep-Sea Res. I, 52: 295-318.
1		1998	-170	-61	150	0.04	0.04096	SO/AESOPS		Coale, KH, Gordon, RM, Wang, X, 2005. The distribution and behavior of dissolved and particulate iron and zinc in the Ross Sea and Antarctic Circumpolar Current along 170oW. Deep-Sea Res. I, 52: 295-318.
1		1998	-170	-61	200	0.12	0.12288	SO/AESOPS		Coale, KH, Gordon, RM, Wang, X, 2005. The distribution and behavior of dissolved and particulate iron and zinc in the Ross Sea and Antarctic Circumpolar Current along 170oW. Deep-Sea Res. I, 52: 295-318.
1		1998	-170	-60	20	0.03	0.03072	SO/AESOPS		Coale, KH, Gordon, RM, Wang, X, 2005. The distribution and behavior of dissolved and particulate iron and zinc in the Ross Sea and Antarctic Circumpolar Current along 170oW. Deep-Sea Res. I, 52: 295-318.
1		1998	-170	-60	40	0.03	0.03072	SO/AESOPS		Coale, KH, Gordon, RM, Wang, X, 2005. The distribution and behavior of dissolved and particulate iron and zinc in the Ross Sea and Antarctic Circumpolar Current along 170oW. Deep-Sea Res. I, 52: 295-318.
1		1998	-170	-60	60	0.03	0.03072	SO/AESOPS		Coale, KH, Gordon, RM, Wang, X, 2005. The distribution and behavior of dissolved and particulate iron and zinc in the Ross Sea and Antarctic Circumpolar Current along 170oW. Deep-Sea Res. I, 52: 295-318.
1		1998	-170	-60	100	0.03	0.03072	SO/AESOPS		Coale, KH, Gordon, RM, Wang, X, 2005. The distribution and behavior of dissolved and particulate iron and zinc in the Ross Sea and Antarctic Circumpolar Current along 170oW. Deep-Sea Res. I, 52: 295-318.
1		1998	-170	-60	50	0.03	0.03072	SO/AESOPS		Coale, KH, Gordon, RM, Wang, X, 2005. The distribution and behavior of dissolved and particulate iron and zinc in the Ross Sea and Antarctic Circumpolar Current along 170oW. Deep-Sea Res. I, 52: 295-318.
1		1998	-170	-60	200	0.03	0.03072	SO/AESOPS		Coale, KH, Gordon, RM, Wang, X, 2005. The distribution and behavior of dissolved and particulate iron and zinc in the Ross Sea and Antarctic Circumpolar Current along 170oW. Deep-Sea Res. I, 52: 295-318.
1		1998	-170	-60	300	0.08	0.08192	SO/AESOPS		Coale, KH, Gordon, RM, Wang, X, 2005. The distribution and behavior of dissolved and particulate iron and zinc in the Ross Sea and Antarctic Circumpolar Current along 170oW. Deep-Sea Res. I, 52: 295-318.
1		1998	-170	-60	500	0.22	0.22528	SO/AESOPS		Coale, KH, Gordon, RM, Wang, X, 2005. The distribution and behavior of dissolved and particulate iron and zinc in the Ross Sea and Antarctic Circumpolar Current along 170oW. Deep-Sea Res. I, 52: 295-318.
10		1996	169	-76	20	0.57	0.58368	SO/AESOPS		Coale, KH, Gordon, RM, Wang, X, 2005. The distribution and behavior of dissolved and particulate iron and zinc in the Ross Sea and Antarctic Circumpolar Current along 170oW. Deep-Sea Res. I, 52: 295-318.
10		1996	169	-76	60	0.28	0.28672	SO/AESOPS		Coale, KH, Gordon, RM, Wang, X, 2005. The distribution and behavior of dissolved and particulate iron and zinc in the Ross Sea and Antarctic Circumpolar Current along 170oW. Deep-Sea Res. I, 52: 295-318.
10		1996	169	-76	100	0.2	0.2048	SO/AESOPS		Coale, KH, Gordon, RM, Wang, X, 2005. The distribution and behavior of dissolved and particulate iron and zinc in the Ross Sea and Antarctic Circumpolar Current along 170oW. Deep-Sea Res. I, 52: 295-318.
10		1996	169	-76	150	0.24	0.24576	SO/AESOPS		Coale, KH, Gordon, RM, Wang, X, 2005. The distribution and behavior of dissolved and particulate iron and zinc in the Ross Sea and Antarctic Circumpolar Current along 170oW. Deep-Sea Res. I, 52: 295-318.
10		1996	169	-76	200	0.26	0.26624	SO/AESOPS		Coale, KH, Gordon, RM, Wang, X, 2005. The distribution and behavior of dissolved and particulate iron and zinc in the Ross Sea and Antarctic Circumpolar Current along 170oW. Deep-Sea Res. I, 52: 295-318.
10		1996	169	-76	300	0.26	0.26624	SO/AESOPS		Coale, KH, Gordon, RM, Wang, X, 2005. The distribution and behavior of dissolved and particulate iron and zinc in the Ross Sea and Antarctic Circumpolar Current along 170oW. Deep-Sea Res. I, 52: 295-318.
10		1996	169	-76	400	0.28	0.28672	SO/AESOPS		Coale, KH, Gordon, RM, Wang, X, 2005. The distribution and behavior of dissolved and particulate iron and zinc in the Ross Sea and Antarctic Circumpolar Current along 170oW. Deep-Sea Res. I, 52: 295-318.
10		1996	169	-76	500	0.26	0.26624	SO/AESOPS		Coale, KH, Gordon, RM, Wang, X, 2005. The distribution and behavior of dissolved and particulate iron and zinc in the Ross Sea and Antarctic Circumpolar Current along 170oW. Deep-Sea Res. I, 52: 295-318.
10		1996	169	-76	600	0.52	0.53248	SO/AESOPS		Coale, KH, Gordon, RM, Wang, X, 2005. The distribution and behavior of dissolved and particulate iron and zinc in the Ross Sea and Antarctic Circumpolar Current along 170oW. Deep-Sea Res. I, 52: 295-318.
10		1996	169	-76	700	1.29	1.32096	SO/AESOPS		Coale, KH, Gordon, RM, Wang, X, 2005. The distribution and behavior of dissolved and particulate iron and zinc in the Ross Sea and Antarctic Circumpolar Current along 170oW. Deep-Sea Res. I, 52: 295-318.
10		1996	172	-76.5	20	0.22	0.22528	SO/AESOPS		Coale, KH, Gordon, RM, Wang, X, 2005. The distribution and behavior of dissolved and particulate iron and zinc in the Ross Sea and Antarctic Circumpolar Current along 170oW. Deep-Sea Res. I, 52: 295-318.
10		1996	172	-76.5	40	0.23	0.23552	SO/AESOPS		Coale, KH, Gordon, RM, Wang, X, 2005. The distribution and behavior of dissolved and particulate iron and zinc in the Ross Sea and Antarctic Circumpolar Current along 170oW. Deep-Sea Res. I, 52: 295-318.
10		1996	172	-76.5	60	0.25	0.256	SO/AESOPS		Coale, KH, Gordon, RM, Wang, X, 2005. The distribution and behavior of dissolved and particulate iron and zinc in the Ross Sea and Antarctic Circumpolar Current along 170oW. Deep-Sea Res. I, 52: 295-318.
10		1996	172	-76.5	100	0.22	0.22528	SO/AESOPS		Coale, KH, Gordon, RM, Wang, X, 2005. The distribution and behavior of dissolved and particulate iron and zinc in the Ross Sea and Antarctic Circumpolar Current along 170oW. Deep-Sea Res. I, 52: 295-318.
10		1996	172	-76.5	150	0.16	0.16384	SO/AESOPS		Coale, KH, Gordon, RM, Wang, X, 2005. The distribution and behavior of dissolved and particulate iron and zinc in the Ross Sea and Antarctic Circumpolar Current along 170oW. Deep-Sea Res. I, 52: 295-318.
10		1996	172	-76.5	200	0.38	0.38912	SO/AESOPS		Coale, KH, Gordon, RM, Wang, X, 2005. The distribution and behavior of dissolved and particulate iron and zinc in the Ross Sea and Antarctic Circumpolar Current along 170oW. Deep-Sea Res. I, 52: 295-318.
10		1996	172	-76.5	300	0.18	0.18432	SO/AESOPS		Coale, KH, Gordon, RM, Wang, X, 2005. The distribution and behavior of dissolved and particulate iron and zinc in the Ross Sea and Antarctic Circumpolar Current along 170oW. Deep-Sea Res. I, 52: 295-318.
10		1996	172	-76.5	400	0.23	0.23552	SO/AESOPS		Coale, KH, Gordon, RM, Wang, X, 2005. The distribution and behavior of dissolved and particulate iron and zinc in the Ross Sea and Antarctic Circumpolar Current along 170oW. Deep-Sea Res. I, 52: 295-318.
10		1996	172	-76.5	500	0.22	0.22528	SO/AESOPS		Coale, KH, Gordon, RM, Wang, X, 2005. The distribution and behavior of dissolved and particulate iron and zinc in the Ross Sea and Antarctic Circumpolar Current along 170oW. Deep-Sea Res. I, 52: 295-318.
10		1996	172	-76.5	600	0.68	0.69632	SO/AESOPS		Coale, KH, Gordon, RM, Wang, X, 2005. The distribution and behavior of dissolved and particulate iron and zinc in the Ross Sea and Antarctic Circumpolar Current along 170oW. Deep-Sea Res. I, 52: 295-318.
10		1996	176	-76.5	20	0.25	0.256	SO/AESOPS		Coale, KH, Gordon, RM, Wang, X, 2005. The distribution and behavior of dissolved and particulate iron and zinc in the Ross Sea and Antarctic Circumpolar Current along 170oW. Deep-Sea Res. I, 52: 295-318.
10		1996	176	-76.5	40	0.17	0.17408	SO/AESOPS		Coale, KH, Gordon, RM, Wang, X, 2005. The distribution and behavior of dissolved and particulate iron and zinc in the Ross Sea and Antarctic Circumpolar Current along 170oW. Deep-Sea Res. I, 52: 295-318.
10		1996	176	-76.5	60	0.24	0.24576	SO/AESOPS		Coale, KH, Gordon, RM, Wang, X, 2005. The distribution and behavior of dissolved and particulate iron and zinc in the Ross Sea and Antarctic Circumpolar Current along 170oW. Deep-Sea Res. I, 52: 295-318.
10		1996	176	-76.5	100	0.18	0.18432	SO/AESOPS		Coale, KH, Gordon, RM, Wang, X, 2005. The distribution and behavior of dissolved and particulate iron and zinc in the Ross Sea and Antarctic Circumpolar Current along 170oW. Deep-Sea Res. I, 52: 295-318.
10		1996	176	-76.5	150	0.22	0.22528	SO/AESOPS		Coale, KH, Gordon, RM, Wang, X, 2005. The distribution and behavior of dissolved and particulate iron and zinc in the Ross Sea and Antarctic Circumpolar Current along 170oW. Deep-Sea Res. I, 52: 295-318.
10		1996	176	-76.5	200	0.32	0.32768	SO/AESOPS		Coale, KH, Gordon, RM, Wang, X, 2005. The distribution and behavior of dissolved and particulate iron and zinc in the Ross Sea and Antarctic Circumpolar Current along 170oW. Deep-Sea Res. I, 52: 295-318.
10		1996	176	-76.5	300	0.18	0.18432	SO/AESOPS		Coale, KH, Gordon, RM, Wang, X, 2005. The distribution and behavior of dissolved and particulate iron and zinc in the Ross Sea and Antarctic Circumpolar Current along 170oW. Deep-Sea Res. I, 52: 295-318.
10		1996	176	-76.5	375	0.46	0.47104	SO/AESOPS		Coale, KH, Gordon, RM, Wang, X, 2005. The distribution and behavior of dissolved and particulate iron and zinc in the Ross Sea and Antarctic Circumpolar Current along 170oW. Deep-Sea Res. I, 52: 295-318.
11		1996	180	-76.55	20	0.43	0.44032	SO/AESOPS		Coale, KH, Gordon, RM, Wang, X, 2005. The distribution and behavior of dissolved and particulate iron and zinc in the Ross Sea and Antarctic Circumpolar Current along 170oW. Deep-Sea Res. I, 52: 295-318.
11		1996	180	-76.55	60	0.27	0.27648	SO/AESOPS		Coale, KH, Gordon, RM, Wang, X, 2005. The distribution and behavior of dissolved and particulate iron and zinc in the Ross Sea and Antarctic Circumpolar Current along 170oW. Deep-Sea Res. I, 52: 295-318.
11		1996	180	-76.55	100	0.1	0.1024	SO/AESOPS		Coale, KH, Gordon, RM, Wang, X, 2005. The distribution and behavior of dissolved and particulate iron and zinc in the Ross Sea and Antarctic Circumpolar Current along 170oW. Deep-Sea Res. I, 52: 295-318.
11		1996	180	-76.55	150	0.44	0.45056	SO/AESOPS		Coale, KH, Gordon, RM, Wang, X, 2005. The distribution and behavior of dissolved and particulate iron and zinc in the Ross Sea and Antarctic Circumpolar Current along 170oW. Deep-Sea Res. I, 52: 295-318.
11		1996	180	-76.55	200	0.21	0.21504	SO/AESOPS		Coale, KH, Gordon, RM, Wang, X, 2005. The distribution and behavior of dissolved and particulate iron and zinc in the Ross Sea and Antarctic Circumpolar Current along 170oW. Deep-Sea Res. I, 52: 295-318.
11		1996	180	-76.55	300	0.28	0.28672	SO/AESOPS		Coale, KH, Gordon, RM, Wang, X, 2005. The distribution and behavior of dissolved and particulate iron and zinc in the Ross Sea and Antarctic Circumpolar Current along 170oW. Deep-Sea Res. I, 52: 295-318.
10		1996	-178	-76.5	20	0.2	0.2048	SO/AESOPS		Coale, KH, Gordon, RM, Wang, X, 2005. The distribution and behavior of dissolved and particulate iron and zinc in the Ross Sea and Antarctic Circumpolar Current along 170oW. Deep-Sea Res. I, 52: 295-318.
10		1996	-178	-76.5	40	0.1	0.1024	SO/AESOPS		Coale, KH, Gordon, RM, Wang, X, 2005. The distribution and behavior of dissolved and particulate iron and zinc in the Ross Sea and Antarctic Circumpolar Current along 170oW. Deep-Sea Res. I, 52: 295-318.
10		1996	-178	-76.5	60	0.08	0.08192	SO/AESOPS		Coale, KH, Gordon, RM, Wang, X, 2005. The distribution and behavior of dissolved and particulate iron and zinc in the Ross Sea and Antarctic Circumpolar Current along 170oW. Deep-Sea Res. I, 52: 295-318.
10		1996	-178	-76.5	100	0.09	0.09216	SO/AESOPS		Coale, KH, Gordon, RM, Wang, X, 2005. The distribution and behavior of dissolved and particulate iron and zinc in the Ross Sea and Antarctic Circumpolar Current along 170oW. Deep-Sea Res. I, 52: 295-318.
10		1996	-178	-76.5	150	0.1	0.1024	SO/AESOPS		Coale, KH, Gordon, RM, Wang, X, 2005. The distribution and behavior of dissolved and particulate iron and zinc in the Ross Sea and Antarctic Circumpolar Current along 170oW. Deep-Sea Res. I, 52: 295-318.
10		1996	-178	-76.5	200	0.09	0.09216	SO/AESOPS		Coale, KH, Gordon, RM, Wang, X, 2005. The distribution and behavior of dissolved and particulate iron and zinc in the Ross Sea and Antarctic Circumpolar Current along 170oW. Deep-Sea Res. I, 52: 295-318.
10		1996	-178	-76.5	300	0.1	0.1024	SO/AESOPS		Coale, KH, Gordon, RM, Wang, X, 2005. The distribution and behavior of dissolved and particulate iron and zinc in the Ross Sea and Antarctic Circumpolar Current along 170oW. Deep-Sea Res. I, 52: 295-318.
10		1996	-178	-76.5	400	0.22	0.22528	SO/AESOPS		Coale, KH, Gordon, RM, Wang, X, 2005. The distribution and behavior of dissolved and particulate iron and zinc in the Ross Sea and Antarctic Circumpolar Current along 170oW. Deep-Sea Res. I, 52: 295-318.
10		1996	-178	-76.5	500	0.62	0.63488	SO/AESOPS		Coale, KH, Gordon, RM, Wang, X, 2005. The distribution and behavior of dissolved and particulate iron and zinc in the Ross Sea and Antarctic Circumpolar Current along 170oW. Deep-Sea Res. I, 52: 295-318.
10		1996	-178	-76.5	550	0.86	0.88064	SO/AESOPS		Coale, KH, Gordon, RM, Wang, X, 2005. The distribution and behavior of dissolved and particulate iron and zinc in the Ross Sea and Antarctic Circumpolar Current along 170oW. Deep-Sea Res. I, 52: 295-318.
10		1996	176.97	-78.05	20	0.42	0.43008	SO/AESOPS		Coale, KH, Gordon, RM, Wang, X, 2005. The distribution and behavior of dissolved and particulate iron and zinc in the Ross Sea and Antarctic Circumpolar Current along 170oW. Deep-Sea Res. I, 52: 295-318.
10		1996	176.97	-78.05	40	0.12	0.12288	SO/AESOPS		Coale, KH, Gordon, RM, Wang, X, 2005. The distribution and behavior of dissolved and particulate iron and zinc in the Ross Sea and Antarctic Circumpolar Current along 170oW. Deep-Sea Res. I, 52: 295-318.
10		1996	176.97	-78.05	60	0.11	0.11264	SO/AESOPS		Coale, KH, Gordon, RM, Wang, X, 2005. The distribution and behavior of dissolved and particulate iron and zinc in the Ross Sea and Antarctic Circumpolar Current along 170oW. Deep-Sea Res. I, 52: 295-318.
10		1996	176.97	-78.05	100	0.16	0.16384	SO/AESOPS		Coale, KH, Gordon, RM, Wang, X, 2005. The distribution and behavior of dissolved and particulate iron and zinc in the Ross Sea and Antarctic Circumpolar Current along 170oW. Deep-Sea Res. I, 52: 295-318.
10		1996	176.97	-78.05	150	0.11	0.11264	SO/AESOPS		Coale, KH, Gordon, RM, Wang, X, 2005. The distribution and behavior of dissolved and particulate iron and zinc in the Ross Sea and Antarctic Circumpolar Current along 170oW. Deep-Sea Res. I, 52: 295-318.
10		1996	176.97	-78.05	200	0.12	0.12288	SO/AESOPS		Coale, KH, Gordon, RM, Wang, X, 2005. The distribution and behavior of dissolved and particulate iron and zinc in the Ross Sea and Antarctic Circumpolar Current along 170oW. Deep-Sea Res. I, 52: 295-318.
10		1996	176.97	-78.05	300	0.1	0.1024	SO/AESOPS		Coale, KH, Gordon, RM, Wang, X, 2005. The distribution and behavior of dissolved and particulate iron and zinc in the Ross Sea and Antarctic Circumpolar Current along 170oW. Deep-Sea Res. I, 52: 295-318.
10		1996	176.97	-78.05	400	0.14	0.14336	SO/AESOPS		Coale, KH, Gordon, RM, Wang, X, 2005. The distribution and behavior of dissolved and particulate iron and zinc in the Ross Sea and Antarctic Circumpolar Current along 170oW. Deep-Sea Res. I, 52: 295-318.
10		1996	176.97	-78.05	500	0.33	0.33792	SO/AESOPS		Coale, KH, Gordon, RM, Wang, X, 2005. The distribution and behavior of dissolved and particulate iron and zinc in the Ross Sea and Antarctic Circumpolar Current along 170oW. Deep-Sea Res. I, 52: 295-318.
1		1997	163.5	-76	20	0.04	0.04096	SO/AESOPS		Coale, KH, Gordon, RM, Wang, X, 2005. The distribution and behavior of dissolved and particulate iron and zinc in the Ross Sea and Antarctic Circumpolar Current along 170oW. Deep-Sea Res. I, 52: 295-318.
1		1997	163.5	-76	40	0.12	0.12288	SO/AESOPS		Coale, KH, Gordon, RM, Wang, X, 2005. The distribution and behavior of dissolved and particulate iron and zinc in the Ross Sea and Antarctic Circumpolar Current along 170oW. Deep-Sea Res. I, 52: 295-318.
1		1997	163.5	-76	60	0.1	0.1024	SO/AESOPS		Coale, KH, Gordon, RM, Wang, X, 2005. The distribution and behavior of dissolved and particulate iron and zinc in the Ross Sea and Antarctic Circumpolar Current along 170oW. Deep-Sea Res. I, 52: 295-318.
1		1997	163.5	-76	100	0.15	0.1536	SO/AESOPS		Coale, KH, Gordon, RM, Wang, X, 2005. The distribution and behavior of dissolved and particulate iron and zinc in the Ross Sea and Antarctic Circumpolar Current along 170oW. Deep-Sea Res. I, 52: 295-318.
1		1997	163.5	-76	150	0.12	0.12288	SO/AESOPS		Coale, KH, Gordon, RM, Wang, X, 2005. The distribution and behavior of dissolved and particulate iron and zinc in the Ross Sea and Antarctic Circumpolar Current along 170oW. Deep-Sea Res. I, 52: 295-318.
1		1997	163.5	-76	200	0.2	0.2048	SO/AESOPS		Coale, KH, Gordon, RM, Wang, X, 2005. The distribution and behavior of dissolved and particulate iron and zinc in the Ross Sea and Antarctic Circumpolar Current along 170oW. Deep-Sea Res. I, 52: 295-318.
1		1997	163.5	-76	300	0.34	0.34816	SO/AESOPS		Coale, KH, Gordon, RM, Wang, X, 2005. The distribution and behavior of dissolved and particulate iron and zinc in the Ross Sea and Antarctic Circumpolar Current along 170oW. Deep-Sea Res. I, 52: 295-318.
1		1997	163.5	-76	400	0.34	0.34816	SO/AESOPS		Coale, KH, Gordon, RM, Wang, X, 2005. The distribution and behavior of dissolved and particulate iron and zinc in the Ross Sea and Antarctic Circumpolar Current along 170oW. Deep-Sea Res. I, 52: 295-318.
1		1997	169	-76.5	20	0.04	0.04096	SO/AESOPS		Coale, KH, Gordon, RM, Wang, X, 2005. The distribution and behavior of dissolved and particulate iron and zinc in the Ross Sea and Antarctic Circumpolar Current along 170oW. Deep-Sea Res. I, 52: 295-318.
1		1997	169	-76.5	40	0.15	0.1536	SO/AESOPS		Coale, KH, Gordon, RM, Wang, X, 2005. The distribution and behavior of dissolved and particulate iron and zinc in the Ross Sea and Antarctic Circumpolar Current along 170oW. Deep-Sea Res. I, 52: 295-318.
1		1997	169	-76.5	60	0.1	0.1024	SO/AESOPS		Coale, KH, Gordon, RM, Wang, X, 2005. The distribution and behavior of dissolved and particulate iron and zinc in the Ross Sea and Antarctic Circumpolar Current along 170oW. Deep-Sea Res. I, 52: 295-318.
1		1997	169	-76.5	100	0.06	0.06144	SO/AESOPS		Coale, KH, Gordon, RM, Wang, X, 2005. The distribution and behavior of dissolved and particulate iron and zinc in the Ross Sea and Antarctic Circumpolar Current along 170oW. Deep-Sea Res. I, 52: 295-318.
1		1997	169	-76.5	150	0.14	0.14336	SO/AESOPS		Coale, KH, Gordon, RM, Wang, X, 2005. The distribution and behavior of dissolved and particulate iron and zinc in the Ross Sea and Antarctic Circumpolar Current along 170oW. Deep-Sea Res. I, 52: 295-318.
1		1997	169	-76.5	300	0.28	0.28672	SO/AESOPS		Coale, KH, Gordon, RM, Wang, X, 2005. The distribution and behavior of dissolved and particulate iron and zinc in the Ross Sea and Antarctic Circumpolar Current along 170oW. Deep-Sea Res. I, 52: 295-318.
1		1997	169	-76.5	400	0.36	0.36864	SO/AESOPS		Coale, KH, Gordon, RM, Wang, X, 2005. The distribution and behavior of dissolved and particulate iron and zinc in the Ross Sea and Antarctic Circumpolar Current along 170oW. Deep-Sea Res. I, 52: 295-318.
1		1997	169	-76.5	500	0.36	0.36864	SO/AESOPS		Coale, KH, Gordon, RM, Wang, X, 2005. The distribution and behavior of dissolved and particulate iron and zinc in the Ross Sea and Antarctic Circumpolar Current along 170oW. Deep-Sea Res. I, 52: 295-318.
1		1997	169	-76.5	600	0.92	0.94208	SO/AESOPS		Coale, KH, Gordon, RM, Wang, X, 2005. The distribution and behavior of dissolved and particulate iron and zinc in the Ross Sea and Antarctic Circumpolar Current along 170oW. Deep-Sea Res. I, 52: 295-318.
1		1997	172	-76.5	20	0.22	0.22528	SO/AESOPS		Coale, KH, Gordon, RM, Wang, X, 2005. The distribution and behavior of dissolved and particulate iron and zinc in the Ross Sea and Antarctic Circumpolar Current along 170oW. Deep-Sea Res. I, 52: 295-318.
1		1997	172	-76.5	40	0.25	0.256	SO/AESOPS		Coale, KH, Gordon, RM, Wang, X, 2005. The distribution and behavior of dissolved and particulate iron and zinc in the Ross Sea and Antarctic Circumpolar Current along 170oW. Deep-Sea Res. I, 52: 295-318.
1		1997	172	-76.5	60	0.49	0.50176	SO/AESOPS		Coale, KH, Gordon, RM, Wang, X, 2005. The distribution and behavior of dissolved and particulate iron and zinc in the Ross Sea and Antarctic Circumpolar Current along 170oW. Deep-Sea Res. I, 52: 295-318.
1		1997	172	-76.5	100	0.13	0.13312	SO/AESOPS		Coale, KH, Gordon, RM, Wang, X, 2005. The distribution and behavior of dissolved and particulate iron and zinc in the Ross Sea and Antarctic Circumpolar Current along 170oW. Deep-Sea Res. I, 52: 295-318.
1		1997	172	-76.5	150	0.14	0.14336	SO/AESOPS		Coale, KH, Gordon, RM, Wang, X, 2005. The distribution and behavior of dissolved and particulate iron and zinc in the Ross Sea and Antarctic Circumpolar Current along 170oW. Deep-Sea Res. I, 52: 295-318.
1		1997	172	-76.5	200	0.12	0.12288	SO/AESOPS		Coale, KH, Gordon, RM, Wang, X, 2005. The distribution and behavior of dissolved and particulate iron and zinc in the Ross Sea and Antarctic Circumpolar Current along 170oW. Deep-Sea Res. I, 52: 295-318.
1		1997	172	-76.5	300	0.3	0.3072	SO/AESOPS		Coale, KH, Gordon, RM, Wang, X, 2005. The distribution and behavior of dissolved and particulate iron and zinc in the Ross Sea and Antarctic Circumpolar Current along 170oW. Deep-Sea Res. I, 52: 295-318.
1		1997	172	-76.5	400	0.54	0.55296	SO/AESOPS		Coale, KH, Gordon, RM, Wang, X, 2005. The distribution and behavior of dissolved and particulate iron and zinc in the Ross Sea and Antarctic Circumpolar Current along 170oW. Deep-Sea Res. I, 52: 295-318.
1		1997	172	-76.5	500	0.39	0.39936	SO/AESOPS		Coale, KH, Gordon, RM, Wang, X, 2005. The distribution and behavior of dissolved and particulate iron and zinc in the Ross Sea and Antarctic Circumpolar Current along 170oW. Deep-Sea Res. I, 52: 295-318.
1		1997	172	-76.5	600	1.71	1.75104	SO/AESOPS		Coale, KH, Gordon, RM, Wang, X, 2005. The distribution and behavior of dissolved and particulate iron and zinc in the Ross Sea and Antarctic Circumpolar Current along 170oW. Deep-Sea Res. I, 52: 295-318.
1		1997	-178	-76.5	20	0.06	0.06144	SO/AESOPS		Coale, KH, Gordon, RM, Wang, X, 2005. The distribution and behavior of dissolved and particulate iron and zinc in the Ross Sea and Antarctic Circumpolar Current along 170oW. Deep-Sea Res. I, 52: 295-318.
1		1997	-178	-76.5	40	0.3	0.3072	SO/AESOPS		Coale, KH, Gordon, RM, Wang, X, 2005. The distribution and behavior of dissolved and particulate iron and zinc in the Ross Sea and Antarctic Circumpolar Current along 170oW. Deep-Sea Res. I, 52: 295-318.
1		1997	-178	-76.5	60	0.07	0.07168	SO/AESOPS		Coale, KH, Gordon, RM, Wang, X, 2005. The distribution and behavior of dissolved and particulate iron and zinc in the Ross Sea and Antarctic Circumpolar Current along 170oW. Deep-Sea Res. I, 52: 295-318.
1		1997	-178	-76.5	100	0.14	0.14336	SO/AESOPS		Coale, KH, Gordon, RM, Wang, X, 2005. The distribution and behavior of dissolved and particulate iron and zinc in the Ross Sea and Antarctic Circumpolar Current along 170oW. Deep-Sea Res. I, 52: 295-318.
1		1997	-178	-76.5	150	0.22	0.22528	SO/AESOPS		Coale, KH, Gordon, RM, Wang, X, 2005. The distribution and behavior of dissolved and particulate iron and zinc in the Ross Sea and Antarctic Circumpolar Current along 170oW. Deep-Sea Res. I, 52: 295-318.
1		1997	-178	-76.5	200	0.21	0.21504	SO/AESOPS		Coale, KH, Gordon, RM, Wang, X, 2005. The distribution and behavior of dissolved and particulate iron and zinc in the Ross Sea and Antarctic Circumpolar Current along 170oW. Deep-Sea Res. I, 52: 295-318.
1		1997	-178	-76.5	300	0.18	0.18432	SO/AESOPS		Coale, KH, Gordon, RM, Wang, X, 2005. The distribution and behavior of dissolved and particulate iron and zinc in the Ross Sea and Antarctic Circumpolar Current along 170oW. Deep-Sea Res. I, 52: 295-318.
1		1997	-178	-76.5	400	0.16	0.16384	SO/AESOPS		Coale, KH, Gordon, RM, Wang, X, 2005. The distribution and behavior of dissolved and particulate iron and zinc in the Ross Sea and Antarctic Circumpolar Current along 170oW. Deep-Sea Res. I, 52: 295-318.
1		1997	-178	-76.5	500	0.26	0.26624	SO/AESOPS		Coale, KH, Gordon, RM, Wang, X, 2005. The distribution and behavior of dissolved and particulate iron and zinc in the Ross Sea and Antarctic Circumpolar Current along 170oW. Deep-Sea Res. I, 52: 295-318.
1		1997	-178	-76.5	550	0.78	0.79872	SO/AESOPS		Coale, KH, Gordon, RM, Wang, X, 2005. The distribution and behavior of dissolved and particulate iron and zinc in the Ross Sea and Antarctic Circumpolar Current along 170oW. Deep-Sea Res. I, 52: 295-318.
1		1997	176.97	-78.05	20	0.04	0.04096	SO/AESOPS		Coale, KH, Gordon, RM, Wang, X, 2005. The distribution and behavior of dissolved and particulate iron and zinc in the Ross Sea and Antarctic Circumpolar Current along 170oW. Deep-Sea Res. I, 52: 295-318.
1		1997	176.97	-78.05	40	0.025	0.0256	SO/AESOPS		Coale, KH, Gordon, RM, Wang, X, 2005. The distribution and behavior of dissolved and particulate iron and zinc in the Ross Sea and Antarctic Circumpolar Current along 170oW. Deep-Sea Res. I, 52: 295-318.
1		1997	176.97	-78.05	60	0.04	0.04096	SO/AESOPS		Coale, KH, Gordon, RM, Wang, X, 2005. The distribution and behavior of dissolved and particulate iron and zinc in the Ross Sea and Antarctic Circumpolar Current along 170oW. Deep-Sea Res. I, 52: 295-318.
1		1997	176.97	-78.05	100	0.06	0.06144	SO/AESOPS		Coale, KH, Gordon, RM, Wang, X, 2005. The distribution and behavior of dissolved and particulate iron and zinc in the Ross Sea and Antarctic Circumpolar Current along 170oW. Deep-Sea Res. I, 52: 295-318.
1		1997	176.97	-78.05	150	0.08	0.08192	SO/AESOPS		Coale, KH, Gordon, RM, Wang, X, 2005. The distribution and behavior of dissolved and particulate iron and zinc in the Ross Sea and Antarctic Circumpolar Current along 170oW. Deep-Sea Res. I, 52: 295-318.
1		1997	176.97	-78.05	200	0.07	0.07168	SO/AESOPS		Coale, KH, Gordon, RM, Wang, X, 2005. The distribution and behavior of dissolved and particulate iron and zinc in the Ross Sea and Antarctic Circumpolar Current along 170oW. Deep-Sea Res. I, 52: 295-318.
1		1997	176.97	-78.05	300	0.08	0.08192	SO/AESOPS		Coale, KH, Gordon, RM, Wang, X, 2005. The distribution and behavior of dissolved and particulate iron and zinc in the Ross Sea and Antarctic Circumpolar Current along 170oW. Deep-Sea Res. I, 52: 295-318.
1		1997	176.97	-78.05	400	0.08	0.08192	SO/AESOPS		Coale, KH, Gordon, RM, Wang, X, 2005. The distribution and behavior of dissolved and particulate iron and zinc in the Ross Sea and Antarctic Circumpolar Current along 170oW. Deep-Sea Res. I, 52: 295-318.
1		1997	176.97	-78.05	500	0.23	0.23552	SO/AESOPS		Coale, KH, Gordon, RM, Wang, X, 2005. The distribution and behavior of dissolved and particulate iron and zinc in the Ross Sea and Antarctic Circumpolar Current along 170oW. Deep-Sea Res. I, 52: 295-318.
1		1997	178.5	-74	20	0.025	0.0256	SO/AESOPS		Coale, KH, Gordon, RM, Wang, X, 2005. The distribution and behavior of dissolved and particulate iron and zinc in the Ross Sea and Antarctic Circumpolar Current along 170oW. Deep-Sea Res. I, 52: 295-318.
1		1997	178.5	-74	40	0.025	0.0256	SO/AESOPS		Coale, KH, Gordon, RM, Wang, X, 2005. The distribution and behavior of dissolved and particulate iron and zinc in the Ross Sea and Antarctic Circumpolar Current along 170oW. Deep-Sea Res. I, 52: 295-318.
1		1997	178.5	-74	60	0.08	0.08192	SO/AESOPS		Coale, KH, Gordon, RM, Wang, X, 2005. The distribution and behavior of dissolved and particulate iron and zinc in the Ross Sea and Antarctic Circumpolar Current along 170oW. Deep-Sea Res. I, 52: 295-318.
1		1997	178.5	-74	100	0.06	0.06144	SO/AESOPS		Coale, KH, Gordon, RM, Wang, X, 2005. The distribution and behavior of dissolved and particulate iron and zinc in the Ross Sea and Antarctic Circumpolar Current along 170oW. Deep-Sea Res. I, 52: 295-318.
1		1997	178.5	-74	150	0.17	0.17408	SO/AESOPS		Coale, KH, Gordon, RM, Wang, X, 2005. The distribution and behavior of dissolved and particulate iron and zinc in the Ross Sea and Antarctic Circumpolar Current along 170oW. Deep-Sea Res. I, 52: 295-318.
1		1997	178.5	-74	200	0.12	0.12288	SO/AESOPS		Coale, KH, Gordon, RM, Wang, X, 2005. The distribution and behavior of dissolved and particulate iron and zinc in the Ross Sea and Antarctic Circumpolar Current along 170oW. Deep-Sea Res. I, 52: 295-318.
1		1997	178.5	-74	300	0.18	0.18432	SO/AESOPS		Coale, KH, Gordon, RM, Wang, X, 2005. The distribution and behavior of dissolved and particulate iron and zinc in the Ross Sea and Antarctic Circumpolar Current along 170oW. Deep-Sea Res. I, 52: 295-318.
1	2	1998	6	-60	10		1.46			Croot et al. 2004. The distribution and speciation of iron along 6E..., Deep-Sea Research II 51, 2857-2879, 2004.
1	2	1998	6	-60	20		0.58			Croot et al. 2004. The distribution and speciation of iron along 6E..., Deep-Sea Research II 51, 2857-2879, 2004.
1	2	1998	6	-60	50		0.48			Croot et al. 2004. The distribution and speciation of iron along 6E..., Deep-Sea Research II 51, 2857-2879, 2004.
1	2	1998	6	-60	100		0.9			Croot et al. 2004. The distribution and speciation of iron along 6E..., Deep-Sea Research II 51, 2857-2879, 2004.
1	2	1998	6	-60	150		0.42			Croot et al. 2004. The distribution and speciation of iron along 6E..., Deep-Sea Research II 51, 2857-2879, 2004.
1	2	1998	6	-60	200		1.01			Croot et al. 2004. The distribution and speciation of iron along 6E..., Deep-Sea Research II 51, 2857-2879, 2004.
1	2	1998	6	-60	300		0.46			Croot et al. 2004. The distribution and speciation of iron along 6E..., Deep-Sea Research II 51, 2857-2879, 2004.
1	2	1998	6	-60	400		0.51			Croot et al. 2004. The distribution and speciation of iron along 6E..., Deep-Sea Research II 51, 2857-2879, 2004.
1	3	1998	6	-60.4	10		0.35			Croot et al. 2004. The distribution and speciation of iron along 6E..., Deep-Sea Research II 51, 2857-2879, 2004.
1	3	1998	6	-60.4	30		0.33			Croot et al. 2004. The distribution and speciation of iron along 6E..., Deep-Sea Research II 51, 2857-2879, 2004.
1	3	1998	6	-60.4	50		0.24			Croot et al. 2004. The distribution and speciation of iron along 6E..., Deep-Sea Research II 51, 2857-2879, 2004.
1	3	1998	6	-60.4	100		0.56			Croot et al. 2004. The distribution and speciation of iron along 6E..., Deep-Sea Research II 51, 2857-2879, 2004.
1	3	1998	6	-60.4	150		0.2			Croot et al. 2004. The distribution and speciation of iron along 6E..., Deep-Sea Research II 51, 2857-2879, 2004.
1	3	1998	6	-60.4	200		0.36			Croot et al. 2004. The distribution and speciation of iron along 6E..., Deep-Sea Research II 51, 2857-2879, 2004.
1	3	1998	6	-60.4	300		0.29			Croot et al. 2004. The distribution and speciation of iron along 6E..., Deep-Sea Research II 51, 2857-2879, 2004.
1	3	1998	6	-60.4	400		0.51			Croot et al. 2004. The distribution and speciation of iron along 6E..., Deep-Sea Research II 51, 2857-2879, 2004.
1	12	1998	6.02	-55.83	10		0.23			Croot et al. 2004. The distribution and speciation of iron along 6E..., Deep-Sea Research II 51, 2857-2879, 2004.
1	12	1998	6.02	-55.83	30		0.19			Croot et al. 2004. The distribution and speciation of iron along 6E..., Deep-Sea Research II 51, 2857-2879, 2004.
1	12	1998	6.02	-55.83	50		0.04			Croot et al. 2004. The distribution and speciation of iron along 6E..., Deep-Sea Research II 51, 2857-2879, 2004.
1	12	1998	6.02	-55.83	100		0.12			Croot et al. 2004. The distribution and speciation of iron along 6E..., Deep-Sea Research II 51, 2857-2879, 2004.
1	12	1998	6.02	-55.83	150		0.14			Croot et al. 2004. The distribution and speciation of iron along 6E..., Deep-Sea Research II 51, 2857-2879, 2004.
1	12	1998	6.02	-55.83	200		0.2			Croot et al. 2004. The distribution and speciation of iron along 6E..., Deep-Sea Research II 51, 2857-2879, 2004.
1	12	1998	6.02	-55.83	300		0.17			Croot et al. 2004. The distribution and speciation of iron along 6E..., Deep-Sea Research II 51, 2857-2879, 2004.
1	12	1998	6.02	-55.83	400		0.18			Croot et al. 2004. The distribution and speciation of iron along 6E..., Deep-Sea Research II 51, 2857-2879, 2004.
1	2	1998	5.98	-49.83	10		0.31			Croot et al. 2004. The distribution and speciation of iron along 6E..., Deep-Sea Research II 51, 2857-2879, 2004.
1	2	1998	5.98	-49.83	30		0.84			Croot et al. 2004. The distribution and speciation of iron along 6E..., Deep-Sea Research II 51, 2857-2879, 2004.
1	2	1998	5.98	-49.83	50		0.07			Croot et al. 2004. The distribution and speciation of iron along 6E..., Deep-Sea Research II 51, 2857-2879, 2004.
1	2	1998	5.98	-49.83	100		0.1			Croot et al. 2004. The distribution and speciation of iron along 6E..., Deep-Sea Research II 51, 2857-2879, 2004.
1	2	1998	5.98	-49.83	150		0.04			Croot et al. 2004. The distribution and speciation of iron along 6E..., Deep-Sea Research II 51, 2857-2879, 2004.
1	2	1998	5.98	-49.83	200		0.06			Croot et al. 2004. The distribution and speciation of iron along 6E..., Deep-Sea Research II 51, 2857-2879, 2004.
1	2	1998	5.98	-49.83	300		0.68			Croot et al. 2004. The distribution and speciation of iron along 6E..., Deep-Sea Research II 51, 2857-2879, 2004.
11	7	2000	20.8	-47.82	20		0.048756	EisenEX		Croot, P.L., et al, 2005, Where does all the iron go? Uncovering the fate of the added iron during the EISENEX iron enrichment experiment, Mar. Chem., submitted			0.2 um, no Pres. correction
11	2	2000	20	-49.3	25		0.0217671	EisenEX		Croot, P.L., et al, 2005, Where does all the iron go? Uncovering the fate of the added iron during the EISENEX iron enrichment experiment, Mar. Chem., submitted			0.2 um, no Pres. correction
11	7	2000	20.8	-47.82	40		0.07314	EisenEX		Croot, P.L., et al, 2005, Where does all the iron go? Uncovering the fate of the added iron during the EISENEX iron enrichment experiment, Mar. Chem., submitted			0.2 um, no Pres. correction
11	2	2000	20	-49.3	50		0.0043032	EisenEX		Croot, P.L., et al, 2005, Where does all the iron go? Uncovering the fate of the added iron during the EISENEX iron enrichment experiment, Mar. Chem., submitted			0.2 um, no Pres. correction
11	7	2000	20.8	-47.82	60		0.0870983	EisenEX		Croot, P.L., et al, 2005, Where does all the iron go? Uncovering the fate of the added iron during the EISENEX iron enrichment experiment, Mar. Chem., submitted			0.2 um, no Pres. correction
11	2	2000	20	-49.3	75		0.0174298	EisenEX		Croot, P.L., et al, 2005, Where does all the iron go? Uncovering the fate of the added iron during the EISENEX iron enrichment experiment, Mar. Chem., submitted			0.2 um, no Pres. correction
11	7	2000	20.8	-47.82	80		0.0381522	EisenEX		Croot, P.L., et al, 2005, Where does all the iron go? Uncovering the fate of the added iron during the EISENEX iron enrichment experiment, Mar. Chem., submitted			0.2 um, no Pres. correction
11	2	2000	20	-49.3	100		0.0278304	EisenEX		Croot, P.L., et al, 2005, Where does all the iron go? Uncovering the fate of the added iron during the EISENEX iron enrichment experiment, Mar. Chem., submitted			0.2 um, no Pres. correction
11	7	2000	20.8	-47.82	150		0.0294484	EisenEX		Croot, P.L., et al, 2005, Where does all the iron go? Uncovering the fate of the added iron during the EISENEX iron enrichment experiment, Mar. Chem., submitted			0.2 um, no Pres. correction
11	7	2000	20.8	-47.82	200		0.0269632	EisenEX		Croot, P.L., et al, 2005, Where does all the iron go? Uncovering the fate of the added iron during the EISENEX iron enrichment experiment, Mar. Chem., submitted			0.2 um, no Pres. correction
11	2	2000	20	-49.3	200		0.0986732	EisenEX		Croot, P.L., et al, 2005, Where does all the iron go? Uncovering the fate of the added iron during the EISENEX iron enrichment experiment, Mar. Chem., submitted			0.2 um, no Pres. correction
11	2	2000	20	-49.3	250		0.0833302	EisenEX		Croot, P.L., et al, 2005, Where does all the iron go? Uncovering the fate of the added iron during the EISENEX iron enrichment experiment, Mar. Chem., submitted			0.2 um, no Pres. correction
11	7	2000	20.8	-47.82	250		0.0386982	EisenEX		Croot, P.L., et al, 2005, Where does all the iron go? Uncovering the fate of the added iron during the EISENEX iron enrichment experiment, Mar. Chem., submitted			0.2 um, no Pres. correction
11	7	2000	20.8	-47.82	300		0.0611932	EisenEX		Croot, P.L., et al, 2005, Where does all the iron go? Uncovering the fate of the added iron during the EISENEX iron enrichment experiment, Mar. Chem., submitted			0.2 um, no Pres. correction
11	7	2000	20.8	-47.82	400		0.087715	EisenEX		Croot, P.L., et al, 2005, Where does all the iron go? Uncovering the fate of the added iron during the EISENEX iron enrichment experiment, Mar. Chem., submitted			0.2 um, no Pres. correction
11	2	2000	20	-49.3	500		0.163803	EisenEX		Croot, P.L., et al, 2005, Where does all the iron go? Uncovering the fate of the added iron during the EISENEX iron enrichment experiment, Mar. Chem., submitted			0.2 um, no Pres. correction
11	2	2000	20	-49.3	750		0.278013	EisenEX		Croot, P.L., et al, 2005, Where does all the iron go? Uncovering the fate of the added iron during the EISENEX iron enrichment experiment, Mar. Chem., submitted			0.2 um, no Pres. correction
11	2	2000	20	-49.3	1000		0.238531	EisenEX		Croot, P.L., et al, 2005, Where does all the iron go? Uncovering the fate of the added iron during the EISENEX iron enrichment experiment, Mar. Chem., submitted			0.2 um, no Pres. correction
9	1	2000	-19.05	12.42	1	0	0.82	NCAtl		de Baar, H.J.W., J.T.M. de Jong, D.C.E. Bakker, B.M. Loscher, C. Veth, U. Bathmann, and V. Smetacek, 1995. Importance of iron for plankton blooms and carbon dioxide drawdown in the Southern Ocean. Nature 373: 412-415.
11	1	1992	-6	-48.7	40	0	0.55	AntAtl		de Baar, H.J.W., J.T.M. de Jong, D.C.E. Bakker, B.M. Loscher, C. Veth, U. Bathmann, and V. Smetacek, 1995. Importance of iron for plankton blooms and carbon dioxide drawdown in the Southern Ocean. Nature 373: 412-415.
11	1	1992	-6	-56	40	0	0.025	AntAtl		de Baar, H.J.W., J.T.M. de Jong, D.C.E. Bakker, B.M. Loscher, C. Veth, U. Bathmann, and V. Smetacek, 1995. Importance of iron for plankton blooms and carbon dioxide drawdown in the Southern Ocean. Nature 373: 412-415.
11	1	1992	-6	-57	40	0	2.3	AntAtl		de Baar, H.J.W., J.T.M. de Jong, D.C.E. Bakker, B.M. Loscher, C. Veth, U. Bathmann, and V. Smetacek, 1995. Importance of iron for plankton blooms and carbon dioxide drawdown in the Southern Ocean. Nature 373: 412-415.
11	1	1992	-6	-48.7	60	0	0.25	AntAtl		de Baar, H.J.W., J.T.M. de Jong, D.C.E. Bakker, B.M. Loscher, C. Veth, U. Bathmann, and V. Smetacek, 1995. Importance of iron for plankton blooms and carbon dioxide drawdown in the Southern Ocean. Nature 373: 412-415.
11	1	1992	-6	-56	60	0	2.5	AntAtl		de Baar, H.J.W., J.T.M. de Jong, D.C.E. Bakker, B.M. Loscher, C. Veth, U. Bathmann, and V. Smetacek, 1995. Importance of iron for plankton blooms and carbon dioxide drawdown in the Southern Ocean. Nature 373: 412-415.
11	1	1992	-6	-48	75	0	0.45	AntAtl		de Baar, H.J.W., J.T.M. de Jong, D.C.E. Bakker, B.M. Loscher, C. Veth, U. Bathmann, and V. Smetacek, 1995. Importance of iron for plankton blooms and carbon dioxide drawdown in the Southern Ocean. Nature 373: 412-415.
11	1	1992	-6	-48	100	0	0.4	AntAtl		de Baar, H.J.W., J.T.M. de Jong, D.C.E. Bakker, B.M. Loscher, C. Veth, U. Bathmann, and V. Smetacek, 1995. Importance of iron for plankton blooms and carbon dioxide drawdown in the Southern Ocean. Nature 373: 412-415.
11	1	1992	-6	-56	100	0	3.75	AntAtl		de Baar, H.J.W., J.T.M. de Jong, D.C.E. Bakker, B.M. Loscher, C. Veth, U. Bathmann, and V. Smetacek, 1995. Importance of iron for plankton blooms and carbon dioxide drawdown in the Southern Ocean. Nature 373: 412-415.
11	1	1992	-6	-57	100	0	3.4	AntAtl		de Baar, H.J.W., J.T.M. de Jong, D.C.E. Bakker, B.M. Loscher, C. Veth, U. Bathmann, and V. Smetacek, 1995. Importance of iron for plankton blooms and carbon dioxide drawdown in the Southern Ocean. Nature 373: 412-415.
11	1	1992	-6	-48.7	100	0	0.22	AntAtl		de Baar, H.J.W., J.T.M. de Jong, D.C.E. Bakker, B.M. Loscher, C. Veth, U. Bathmann, and V. Smetacek, 1995. Importance of iron for plankton blooms and carbon dioxide drawdown in the Southern Ocean. Nature 373: 412-415.
11	1	1992	-6	-57	150	0	0.2	AntAtl		de Baar, H.J.W., J.T.M. de Jong, D.C.E. Bakker, B.M. Loscher, C. Veth, U. Bathmann, and V. Smetacek, 1995. Importance of iron for plankton blooms and carbon dioxide drawdown in the Southern Ocean. Nature 373: 412-415.
11	1	1992	-6	-56	150	0	0.5	AntAtl		de Baar, H.J.W., J.T.M. de Jong, D.C.E. Bakker, B.M. Loscher, C. Veth, U. Bathmann, and V. Smetacek, 1995. Importance of iron for plankton blooms and carbon dioxide drawdown in the Southern Ocean. Nature 373: 412-415.
11	1	1992	-6	-48	150	0	0.7	AntAtl		de Baar, H.J.W., J.T.M. de Jong, D.C.E. Bakker, B.M. Loscher, C. Veth, U. Bathmann, and V. Smetacek, 1995. Importance of iron for plankton blooms and carbon dioxide drawdown in the Southern Ocean. Nature 373: 412-415.
11	1	1992	-6	-48.7	150	0	0.6	AntAtl		de Baar, H.J.W., J.T.M. de Jong, D.C.E. Bakker, B.M. Loscher, C. Veth, U. Bathmann, and V. Smetacek, 1995. Importance of iron for plankton blooms and carbon dioxide drawdown in the Southern Ocean. Nature 373: 412-415.
11	1	1992	-6	-56	200	0	0.4	AntAtl		de Baar, H.J.W., J.T.M. de Jong, D.C.E. Bakker, B.M. Loscher, C. Veth, U. Bathmann, and V. Smetacek, 1995. Importance of iron for plankton blooms and carbon dioxide drawdown in the Southern Ocean. Nature 373: 412-415.
11	1	1992	-6	-57	200	0	0.3	AntAtl		de Baar, H.J.W., J.T.M. de Jong, D.C.E. Bakker, B.M. Loscher, C. Veth, U. Bathmann, and V. Smetacek, 1995. Importance of iron for plankton blooms and carbon dioxide drawdown in the Southern Ocean. Nature 373: 412-415.
11	1	1992	-6	-48.7	200	0	0.3	AntAtl		de Baar, H.J.W., J.T.M. de Jong, D.C.E. Bakker, B.M. Loscher, C. Veth, U. Bathmann, and V. Smetacek, 1995. Importance of iron for plankton blooms and carbon dioxide drawdown in the Southern Ocean. Nature 373: 412-415.
11	1	1992	-6	-48	300	0	1	AntAtl		de Baar, H.J.W., J.T.M. de Jong, D.C.E. Bakker, B.M. Loscher, C. Veth, U. Bathmann, and V. Smetacek, 1995. Importance of iron for plankton blooms and carbon dioxide drawdown in the Southern Ocean. Nature 373: 412-415.
11	1	1992	-6	-48.7	300	0	0.3	AntAtl		de Baar, H.J.W., J.T.M. de Jong, D.C.E. Bakker, B.M. Loscher, C. Veth, U. Bathmann, and V. Smetacek, 1995. Importance of iron for plankton blooms and carbon dioxide drawdown in the Southern Ocean. Nature 373: 412-415.
11	1	1992	-6	-56	300	0	2	AntAtl		de Baar, H.J.W., J.T.M. de Jong, D.C.E. Bakker, B.M. Loscher, C. Veth, U. Bathmann, and V. Smetacek, 1995. Importance of iron for plankton blooms and carbon dioxide drawdown in the Southern Ocean. Nature 373: 412-415.
11	1	1992	-6	-57	400	0	0.5	AntAtl		de Baar, H.J.W., J.T.M. de Jong, D.C.E. Bakker, B.M. Loscher, C. Veth, U. Bathmann, and V. Smetacek, 1995. Importance of iron for plankton blooms and carbon dioxide drawdown in the Southern Ocean. Nature 373: 412-415.
4	15	1995	-89.5	-64	25	0	0.15	AntPac		de Baar, H.J.W., J.T.M. de Jong, R.F. Nolting, K.R. Timmermans, M.A. van Leeuwe, U. Bathmann, M.R. van der Loeff, and J. Sildam, 1999. Low dissolved Fe and the absence of diatom blooms in remote Pacific waters of the Southern Ocean. Mar. Chem. 66: 1-34.		day and month are guesses
4	15	1995	-97.2	-68.5	25	0	0.22	AntPac		de Baar, H.J.W., J.T.M. de Jong, R.F. Nolting, K.R. Timmermans, M.A. van Leeuwe, U. Bathmann, M.R. van der Loeff, and J. Sildam, 1999. Low dissolved Fe and the absence of diatom blooms in remote Pacific waters of the Southern Ocean. Mar. Chem. 66: 1-34.		day and month are guesses
4	15	1995	-89.5	-61	25	0	0.05	AntPac		de Baar, H.J.W., J.T.M. de Jong, R.F. Nolting, K.R. Timmermans, M.A. van Leeuwe, U. Bathmann, M.R. van der Loeff, and J. Sildam, 1999. Low dissolved Fe and the absence of diatom blooms in remote Pacific waters of the Southern Ocean. Mar. Chem. 66: 1-34.		day and month are guesses
4	15	1995	-91.2	-65.4	25	0	0.19	AntPac		de Baar, H.J.W., J.T.M. de Jong, R.F. Nolting, K.R. Timmermans, M.A. van Leeuwe, U. Bathmann, M.R. van der Loeff, and J. Sildam, 1999. Low dissolved Fe and the absence of diatom blooms in remote Pacific waters of the Southern Ocean. Mar. Chem. 66: 1-34.		day and month are guesses
3	15	1995	-91.9	-58	25	0	0.11	AntPac		de Baar, H.J.W., J.T.M. de Jong, R.F. Nolting, K.R. Timmermans, M.A. van Leeuwe, U. Bathmann, M.R. van der Loeff, and J. Sildam, 1999. Low dissolved Fe and the absence of diatom blooms in remote Pacific waters of the Southern Ocean. Mar. Chem. 66: 1-34.		day and month are guesses
3	15	1995	-91.9	-58	50	0	0.1	AntPac		de Baar, H.J.W., J.T.M. de Jong, R.F. Nolting, K.R. Timmermans, M.A. van Leeuwe, U. Bathmann, M.R. van der Loeff, and J. Sildam, 1999. Low dissolved Fe and the absence of diatom blooms in remote Pacific waters of the Southern Ocean. Mar. Chem. 66: 1-34.		day and month are guesses
3	15	1995	-91.2	-57.3	50	0	0.29	AntPac		de Baar, H.J.W., J.T.M. de Jong, R.F. Nolting, K.R. Timmermans, M.A. van Leeuwe, U. Bathmann, M.R. van der Loeff, and J. Sildam, 1999. Low dissolved Fe and the absence of diatom blooms in remote Pacific waters of the Southern Ocean. Mar. Chem. 66: 1-34.		day and month are guesses
4	15	1995	-89.5	-61	50	0	0.06	AntPac		de Baar, H.J.W., J.T.M. de Jong, R.F. Nolting, K.R. Timmermans, M.A. van Leeuwe, U. Bathmann, M.R. van der Loeff, and J. Sildam, 1999. Low dissolved Fe and the absence of diatom blooms in remote Pacific waters of the Southern Ocean. Mar. Chem. 66: 1-34.		day and month are guesses
3	15	1995	-89.7	-54.3	50	0	0.31	AntPac		de Baar, H.J.W., J.T.M. de Jong, R.F. Nolting, K.R. Timmermans, M.A. van Leeuwe, U. Bathmann, M.R. van der Loeff, and J. Sildam, 1999. Low dissolved Fe and the absence of diatom blooms in remote Pacific waters of the Southern Ocean. Mar. Chem. 66: 1-34.		day and month are guesses
3	15	1995	-96.1	-59.7	50	0	0.34	AntPac		de Baar, H.J.W., J.T.M. de Jong, R.F. Nolting, K.R. Timmermans, M.A. van Leeuwe, U. Bathmann, M.R. van der Loeff, and J. Sildam, 1999. Low dissolved Fe and the absence of diatom blooms in remote Pacific waters of the Southern Ocean. Mar. Chem. 66: 1-34.		day and month are guesses
4	15	1995	-89.5	-64	50	0	0.16	AntPac		de Baar, H.J.W., J.T.M. de Jong, R.F. Nolting, K.R. Timmermans, M.A. van Leeuwe, U. Bathmann, M.R. van der Loeff, and J. Sildam, 1999. Low dissolved Fe and the absence of diatom blooms in remote Pacific waters of the Southern Ocean. Mar. Chem. 66: 1-34.		day and month are guesses
4	15	1995	-89.4	-68.3	50	0	0.21	AntPac		de Baar, H.J.W., J.T.M. de Jong, R.F. Nolting, K.R. Timmermans, M.A. van Leeuwe, U. Bathmann, M.R. van der Loeff, and J. Sildam, 1999. Low dissolved Fe and the absence of diatom blooms in remote Pacific waters of the Southern Ocean. Mar. Chem. 66: 1-34.		day and month are guesses
4	15	1995	-91.2	-65.4	50	0	0.17	AntPac		de Baar, H.J.W., J.T.M. de Jong, R.F. Nolting, K.R. Timmermans, M.A. van Leeuwe, U. Bathmann, M.R. van der Loeff, and J. Sildam, 1999. Low dissolved Fe and the absence of diatom blooms in remote Pacific waters of the Southern Ocean. Mar. Chem. 66: 1-34.		day and month are guesses
4	15	1995	-97.2	-68.5	50	0	0.12	AntPac		de Baar, H.J.W., J.T.M. de Jong, R.F. Nolting, K.R. Timmermans, M.A. van Leeuwe, U. Bathmann, M.R. van der Loeff, and J. Sildam, 1999. Low dissolved Fe and the absence of diatom blooms in remote Pacific waters of the Southern Ocean. Mar. Chem. 66: 1-34.		day and month are guesses
4	15	1995	-89.5	-61	75	0	0.13	AntPac		de Baar, H.J.W., J.T.M. de Jong, R.F. Nolting, K.R. Timmermans, M.A. van Leeuwe, U. Bathmann, M.R. van der Loeff, and J. Sildam, 1999. Low dissolved Fe and the absence of diatom blooms in remote Pacific waters of the Southern Ocean. Mar. Chem. 66: 1-34.		day and month are guesses
4	15	1995	-91.2	-65.4	75	0	0.18	AntPac		de Baar, H.J.W., J.T.M. de Jong, R.F. Nolting, K.R. Timmermans, M.A. van Leeuwe, U. Bathmann, M.R. van der Loeff, and J. Sildam, 1999. Low dissolved Fe and the absence of diatom blooms in remote Pacific waters of the Southern Ocean. Mar. Chem. 66: 1-34.		day and month are guesses
3	15	1995	-91.2	-57.3	75	0	0.11	AntPac		de Baar, H.J.W., J.T.M. de Jong, R.F. Nolting, K.R. Timmermans, M.A. van Leeuwe, U. Bathmann, M.R. van der Loeff, and J. Sildam, 1999. Low dissolved Fe and the absence of diatom blooms in remote Pacific waters of the Southern Ocean. Mar. Chem. 66: 1-34.		day and month are guesses
4	15	1995	-89.5	-64	75	0	0.16	AntPac		de Baar, H.J.W., J.T.M. de Jong, R.F. Nolting, K.R. Timmermans, M.A. van Leeuwe, U. Bathmann, M.R. van der Loeff, and J. Sildam, 1999. Low dissolved Fe and the absence of diatom blooms in remote Pacific waters of the Southern Ocean. Mar. Chem. 66: 1-34.		day and month are guesses
4	15	1995	-97.2	-68.5	75	0	0.15	AntPac		de Baar, H.J.W., J.T.M. de Jong, R.F. Nolting, K.R. Timmermans, M.A. van Leeuwe, U. Bathmann, M.R. van der Loeff, and J. Sildam, 1999. Low dissolved Fe and the absence of diatom blooms in remote Pacific waters of the Southern Ocean. Mar. Chem. 66: 1-34.		day and month are guesses
3	15	1995	-91.9	-58	75	0	0.1	AntPac		de Baar, H.J.W., J.T.M. de Jong, R.F. Nolting, K.R. Timmermans, M.A. van Leeuwe, U. Bathmann, M.R. van der Loeff, and J. Sildam, 1999. Low dissolved Fe and the absence of diatom blooms in remote Pacific waters of the Southern Ocean. Mar. Chem. 66: 1-34.		day and month are guesses
3	15	1995	-96.1	-59.7	75	0	0.3	AntPac		de Baar, H.J.W., J.T.M. de Jong, R.F. Nolting, K.R. Timmermans, M.A. van Leeuwe, U. Bathmann, M.R. van der Loeff, and J. Sildam, 1999. Low dissolved Fe and the absence of diatom blooms in remote Pacific waters of the Southern Ocean. Mar. Chem. 66: 1-34.		day and month are guesses
4	15	1995	-89.4	-68.3	75	0	0.25	AntPac		de Baar, H.J.W., J.T.M. de Jong, R.F. Nolting, K.R. Timmermans, M.A. van Leeuwe, U. Bathmann, M.R. van der Loeff, and J. Sildam, 1999. Low dissolved Fe and the absence of diatom blooms in remote Pacific waters of the Southern Ocean. Mar. Chem. 66: 1-34.		day and month are guesses
4	15	1995	-89.5	-64	100	0	0.24	AntPac		de Baar, H.J.W., J.T.M. de Jong, R.F. Nolting, K.R. Timmermans, M.A. van Leeuwe, U. Bathmann, M.R. van der Loeff, and J. Sildam, 1999. Low dissolved Fe and the absence of diatom blooms in remote Pacific waters of the Southern Ocean. Mar. Chem. 66: 1-34.		day and month are guesses
4	15	1995	-89.5	-61	100	0	0.08	AntPac		de Baar, H.J.W., J.T.M. de Jong, R.F. Nolting, K.R. Timmermans, M.A. van Leeuwe, U. Bathmann, M.R. van der Loeff, and J. Sildam, 1999. Low dissolved Fe and the absence of diatom blooms in remote Pacific waters of the Southern Ocean. Mar. Chem. 66: 1-34.		day and month are guesses
3	15	1995	-91.9	-58	100	0	0.07	AntPac		de Baar, H.J.W., J.T.M. de Jong, R.F. Nolting, K.R. Timmermans, M.A. van Leeuwe, U. Bathmann, M.R. van der Loeff, and J. Sildam, 1999. Low dissolved Fe and the absence of diatom blooms in remote Pacific waters of the Southern Ocean. Mar. Chem. 66: 1-34.		day and month are guesses
3	15	1995	-89.7	-54.3	100	0	0.3	AntPac		de Baar, H.J.W., J.T.M. de Jong, R.F. Nolting, K.R. Timmermans, M.A. van Leeuwe, U. Bathmann, M.R. van der Loeff, and J. Sildam, 1999. Low dissolved Fe and the absence of diatom blooms in remote Pacific waters of the Southern Ocean. Mar. Chem. 66: 1-34.		day and month are guesses
3	15	1995	-91.2	-57.3	100	0	0.1	AntPac		de Baar, H.J.W., J.T.M. de Jong, R.F. Nolting, K.R. Timmermans, M.A. van Leeuwe, U. Bathmann, M.R. van der Loeff, and J. Sildam, 1999. Low dissolved Fe and the absence of diatom blooms in remote Pacific waters of the Southern Ocean. Mar. Chem. 66: 1-34.		day and month are guesses
4	15	1995	-91.2	-65.4	100	0	0.16	AntPac		de Baar, H.J.W., J.T.M. de Jong, R.F. Nolting, K.R. Timmermans, M.A. van Leeuwe, U. Bathmann, M.R. van der Loeff, and J. Sildam, 1999. Low dissolved Fe and the absence of diatom blooms in remote Pacific waters of the Southern Ocean. Mar. Chem. 66: 1-34.		day and month are guesses
4	15	1995	-89.4	-68.3	100	0	0.41	AntPac		de Baar, H.J.W., J.T.M. de Jong, R.F. Nolting, K.R. Timmermans, M.A. van Leeuwe, U. Bathmann, M.R. van der Loeff, and J. Sildam, 1999. Low dissolved Fe and the absence of diatom blooms in remote Pacific waters of the Southern Ocean. Mar. Chem. 66: 1-34.		day and month are guesses
3	15	1995	-89.4	-51.9	100	0	0.55	AntPac		de Baar, H.J.W., J.T.M. de Jong, R.F. Nolting, K.R. Timmermans, M.A. van Leeuwe, U. Bathmann, M.R. van der Loeff, and J. Sildam, 1999. Low dissolved Fe and the absence of diatom blooms in remote Pacific waters of the Southern Ocean. Mar. Chem. 66: 1-34.		day and month are guesses
4	15	1995	-89.4	-68.3	150	0	0.31	AntPac		de Baar, H.J.W., J.T.M. de Jong, R.F. Nolting, K.R. Timmermans, M.A. van Leeuwe, U. Bathmann, M.R. van der Loeff, and J. Sildam, 1999. Low dissolved Fe and the absence of diatom blooms in remote Pacific waters of the Southern Ocean. Mar. Chem. 66: 1-34.		day and month are guesses
4	15	1995	-89.5	-61	150	0	0.13	AntPac		de Baar, H.J.W., J.T.M. de Jong, R.F. Nolting, K.R. Timmermans, M.A. van Leeuwe, U. Bathmann, M.R. van der Loeff, and J. Sildam, 1999. Low dissolved Fe and the absence of diatom blooms in remote Pacific waters of the Southern Ocean. Mar. Chem. 66: 1-34.		day and month are guesses
4	15	1995	-89.5	-64	150	0	0.37	AntPac		de Baar, H.J.W., J.T.M. de Jong, R.F. Nolting, K.R. Timmermans, M.A. van Leeuwe, U. Bathmann, M.R. van der Loeff, and J. Sildam, 1999. Low dissolved Fe and the absence of diatom blooms in remote Pacific waters of the Southern Ocean. Mar. Chem. 66: 1-34.		day and month are guesses
3	15	1995	-91.2	-57.3	150	0	0.13	AntPac		de Baar, H.J.W., J.T.M. de Jong, R.F. Nolting, K.R. Timmermans, M.A. van Leeuwe, U. Bathmann, M.R. van der Loeff, and J. Sildam, 1999. Low dissolved Fe and the absence of diatom blooms in remote Pacific waters of the Southern Ocean. Mar. Chem. 66: 1-34.		day and month are guesses
4	15	1995	-91.2	-65.4	150	0	0.17	AntPac		de Baar, H.J.W., J.T.M. de Jong, R.F. Nolting, K.R. Timmermans, M.A. van Leeuwe, U. Bathmann, M.R. van der Loeff, and J. Sildam, 1999. Low dissolved Fe and the absence of diatom blooms in remote Pacific waters of the Southern Ocean. Mar. Chem. 66: 1-34.		day and month are guesses
3	15	1995	-96.1	-59.7	150	0	0.16	AntPac		de Baar, H.J.W., J.T.M. de Jong, R.F. Nolting, K.R. Timmermans, M.A. van Leeuwe, U. Bathmann, M.R. van der Loeff, and J. Sildam, 1999. Low dissolved Fe and the absence of diatom blooms in remote Pacific waters of the Southern Ocean. Mar. Chem. 66: 1-34.		day and month are guesses
4	15	1995	-97.2	-68.5	150	0	0.11	AntPac		de Baar, H.J.W., J.T.M. de Jong, R.F. Nolting, K.R. Timmermans, M.A. van Leeuwe, U. Bathmann, M.R. van der Loeff, and J. Sildam, 1999. Low dissolved Fe and the absence of diatom blooms in remote Pacific waters of the Southern Ocean. Mar. Chem. 66: 1-34.		day and month are guesses
3	15	1995	-89.7	-54.3	150	0	0.16	AntPac		de Baar, H.J.W., J.T.M. de Jong, R.F. Nolting, K.R. Timmermans, M.A. van Leeuwe, U. Bathmann, M.R. van der Loeff, and J. Sildam, 1999. Low dissolved Fe and the absence of diatom blooms in remote Pacific waters of the Southern Ocean. Mar. Chem. 66: 1-34.		day and month are guesses
3	15	1995	-89.4	-51.9	200	0	0.28	AntPac		de Baar, H.J.W., J.T.M. de Jong, R.F. Nolting, K.R. Timmermans, M.A. van Leeuwe, U. Bathmann, M.R. van der Loeff, and J. Sildam, 1999. Low dissolved Fe and the absence of diatom blooms in remote Pacific waters of the Southern Ocean. Mar. Chem. 66: 1-34.		day and month are guesses
4	15	1995	-97.2	-68.5	200	0	0.51	AntPac		de Baar, H.J.W., J.T.M. de Jong, R.F. Nolting, K.R. Timmermans, M.A. van Leeuwe, U. Bathmann, M.R. van der Loeff, and J. Sildam, 1999. Low dissolved Fe and the absence of diatom blooms in remote Pacific waters of the Southern Ocean. Mar. Chem. 66: 1-34.		day and month are guesses
3	15	1995	-91.9	-58	200	0	0.23	AntPac		de Baar, H.J.W., J.T.M. de Jong, R.F. Nolting, K.R. Timmermans, M.A. van Leeuwe, U. Bathmann, M.R. van der Loeff, and J. Sildam, 1999. Low dissolved Fe and the absence of diatom blooms in remote Pacific waters of the Southern Ocean. Mar. Chem. 66: 1-34.		day and month are guesses
3	15	1995	-89.7	-54.3	200	0	0.27	AntPac		de Baar, H.J.W., J.T.M. de Jong, R.F. Nolting, K.R. Timmermans, M.A. van Leeuwe, U. Bathmann, M.R. van der Loeff, and J. Sildam, 1999. Low dissolved Fe and the absence of diatom blooms in remote Pacific waters of the Southern Ocean. Mar. Chem. 66: 1-34.		day and month are guesses
3	15	1995	-91.2	-57.3	200	0	0.21	AntPac		de Baar, H.J.W., J.T.M. de Jong, R.F. Nolting, K.R. Timmermans, M.A. van Leeuwe, U. Bathmann, M.R. van der Loeff, and J. Sildam, 1999. Low dissolved Fe and the absence of diatom blooms in remote Pacific waters of the Southern Ocean. Mar. Chem. 66: 1-34.		day and month are guesses
4	15	1995	-89.5	-61	200	0	0.13	AntPac		de Baar, H.J.W., J.T.M. de Jong, R.F. Nolting, K.R. Timmermans, M.A. van Leeuwe, U. Bathmann, M.R. van der Loeff, and J. Sildam, 1999. Low dissolved Fe and the absence of diatom blooms in remote Pacific waters of the Southern Ocean. Mar. Chem. 66: 1-34.		day and month are guesses
4	15	1995	-89.4	-68.3	200	0	0.86	AntPac		de Baar, H.J.W., J.T.M. de Jong, R.F. Nolting, K.R. Timmermans, M.A. van Leeuwe, U. Bathmann, M.R. van der Loeff, and J. Sildam, 1999. Low dissolved Fe and the absence of diatom blooms in remote Pacific waters of the Southern Ocean. Mar. Chem. 66: 1-34.		day and month are guesses
4	15	1995	-89.5	-64	200	0	0.39	AntPac		de Baar, H.J.W., J.T.M. de Jong, R.F. Nolting, K.R. Timmermans, M.A. van Leeuwe, U. Bathmann, M.R. van der Loeff, and J. Sildam, 1999. Low dissolved Fe and the absence of diatom blooms in remote Pacific waters of the Southern Ocean. Mar. Chem. 66: 1-34.		day and month are guesses
4	15	1995	-91.2	-65.4	200	0	0.3	AntPac		de Baar, H.J.W., J.T.M. de Jong, R.F. Nolting, K.R. Timmermans, M.A. van Leeuwe, U. Bathmann, M.R. van der Loeff, and J. Sildam, 1999. Low dissolved Fe and the absence of diatom blooms in remote Pacific waters of the Southern Ocean. Mar. Chem. 66: 1-34.		day and month are guesses
3	15	1995	-91.9	-58	250	0	0.21	AntPac		de Baar, H.J.W., J.T.M. de Jong, R.F. Nolting, K.R. Timmermans, M.A. van Leeuwe, U. Bathmann, M.R. van der Loeff, and J. Sildam, 1999. Low dissolved Fe and the absence of diatom blooms in remote Pacific waters of the Southern Ocean. Mar. Chem. 66: 1-34.		day and month are guesses
3	15	1995	-91.9	-58	300	0	0.17	AntPac		de Baar, H.J.W., J.T.M. de Jong, R.F. Nolting, K.R. Timmermans, M.A. van Leeuwe, U. Bathmann, M.R. van der Loeff, and J. Sildam, 1999. Low dissolved Fe and the absence of diatom blooms in remote Pacific waters of the Southern Ocean. Mar. Chem. 66: 1-34.		day and month are guesses
4	15	1995	-91.2	-65.4	300	0	0.2	AntPac		de Baar, H.J.W., J.T.M. de Jong, R.F. Nolting, K.R. Timmermans, M.A. van Leeuwe, U. Bathmann, M.R. van der Loeff, and J. Sildam, 1999. Low dissolved Fe and the absence of diatom blooms in remote Pacific waters of the Southern Ocean. Mar. Chem. 66: 1-34.		day and month are guesses
4	15	1995	-89.5	-61	300	0	0.07	AntPac		de Baar, H.J.W., J.T.M. de Jong, R.F. Nolting, K.R. Timmermans, M.A. van Leeuwe, U. Bathmann, M.R. van der Loeff, and J. Sildam, 1999. Low dissolved Fe and the absence of diatom blooms in remote Pacific waters of the Southern Ocean. Mar. Chem. 66: 1-34.		day and month are guesses
4	15	1995	-97.2	-68.5	300	0	0.15	AntPac		de Baar, H.J.W., J.T.M. de Jong, R.F. Nolting, K.R. Timmermans, M.A. van Leeuwe, U. Bathmann, M.R. van der Loeff, and J. Sildam, 1999. Low dissolved Fe and the absence of diatom blooms in remote Pacific waters of the Southern Ocean. Mar. Chem. 66: 1-34.		day and month are guesses
4	15	1995	-89.4	-68.3	300	0	0.29	AntPac		de Baar, H.J.W., J.T.M. de Jong, R.F. Nolting, K.R. Timmermans, M.A. van Leeuwe, U. Bathmann, M.R. van der Loeff, and J. Sildam, 1999. Low dissolved Fe and the absence of diatom blooms in remote Pacific waters of the Southern Ocean. Mar. Chem. 66: 1-34.		day and month are guesses
4	15	1995	-89.5	-64	300	0	0.27	AntPac		de Baar, H.J.W., J.T.M. de Jong, R.F. Nolting, K.R. Timmermans, M.A. van Leeuwe, U. Bathmann, M.R. van der Loeff, and J. Sildam, 1999. Low dissolved Fe and the absence of diatom blooms in remote Pacific waters of the Southern Ocean. Mar. Chem. 66: 1-34.		day and month are guesses
3	15	1995	-96.1	-59.7	300	0	0.35	AntPac		de Baar, H.J.W., J.T.M. de Jong, R.F. Nolting, K.R. Timmermans, M.A. van Leeuwe, U. Bathmann, M.R. van der Loeff, and J. Sildam, 1999. Low dissolved Fe and the absence of diatom blooms in remote Pacific waters of the Southern Ocean. Mar. Chem. 66: 1-34.		day and month are guesses
3	15	1995	-91.2	-57.3	300	0	0.31	AntPac		de Baar, H.J.W., J.T.M. de Jong, R.F. Nolting, K.R. Timmermans, M.A. van Leeuwe, U. Bathmann, M.R. van der Loeff, and J. Sildam, 1999. Low dissolved Fe and the absence of diatom blooms in remote Pacific waters of the Southern Ocean. Mar. Chem. 66: 1-34.		day and month are guesses
4	15	1995	-89.5	-64	400	0	0.2	AntPac		de Baar, H.J.W., J.T.M. de Jong, R.F. Nolting, K.R. Timmermans, M.A. van Leeuwe, U. Bathmann, M.R. van der Loeff, and J. Sildam, 1999. Low dissolved Fe and the absence of diatom blooms in remote Pacific waters of the Southern Ocean. Mar. Chem. 66: 1-34.		day and month are guesses
4	15	1995	-91.2	-65.4	400	0	0.18	AntPac		de Baar, H.J.W., J.T.M. de Jong, R.F. Nolting, K.R. Timmermans, M.A. van Leeuwe, U. Bathmann, M.R. van der Loeff, and J. Sildam, 1999. Low dissolved Fe and the absence of diatom blooms in remote Pacific waters of the Southern Ocean. Mar. Chem. 66: 1-34.		day and month are guesses
4	15	1995	-97.2	-68.5	400	0	0.42	AntPac		de Baar, H.J.W., J.T.M. de Jong, R.F. Nolting, K.R. Timmermans, M.A. van Leeuwe, U. Bathmann, M.R. van der Loeff, and J. Sildam, 1999. Low dissolved Fe and the absence of diatom blooms in remote Pacific waters of the Southern Ocean. Mar. Chem. 66: 1-34.		day and month are guesses
3	15	1995	-96.1	-59.7	400	0	0.28	AntPac		de Baar, H.J.W., J.T.M. de Jong, R.F. Nolting, K.R. Timmermans, M.A. van Leeuwe, U. Bathmann, M.R. van der Loeff, and J. Sildam, 1999. Low dissolved Fe and the absence of diatom blooms in remote Pacific waters of the Southern Ocean. Mar. Chem. 66: 1-34.		day and month are guesses
3	15	1995	-89.4	-51.9	400	0	0.19	AntPac		de Baar, H.J.W., J.T.M. de Jong, R.F. Nolting, K.R. Timmermans, M.A. van Leeuwe, U. Bathmann, M.R. van der Loeff, and J. Sildam, 1999. Low dissolved Fe and the absence of diatom blooms in remote Pacific waters of the Southern Ocean. Mar. Chem. 66: 1-34.		day and month are guesses
3	15	1995	-89.7	-54.3	400	0	0.2	AntPac		de Baar, H.J.W., J.T.M. de Jong, R.F. Nolting, K.R. Timmermans, M.A. van Leeuwe, U. Bathmann, M.R. van der Loeff, and J. Sildam, 1999. Low dissolved Fe and the absence of diatom blooms in remote Pacific waters of the Southern Ocean. Mar. Chem. 66: 1-34.		day and month are guesses
4	15	1995	-89.4	-68.3	400	0	0.43	AntPac		de Baar, H.J.W., J.T.M. de Jong, R.F. Nolting, K.R. Timmermans, M.A. van Leeuwe, U. Bathmann, M.R. van der Loeff, and J. Sildam, 1999. Low dissolved Fe and the absence of diatom blooms in remote Pacific waters of the Southern Ocean. Mar. Chem. 66: 1-34.		day and month are guesses
3	15	1995	-91.9	-58	400	0	0.4	AntPac		de Baar, H.J.W., J.T.M. de Jong, R.F. Nolting, K.R. Timmermans, M.A. van Leeuwe, U. Bathmann, M.R. van der Loeff, and J. Sildam, 1999. Low dissolved Fe and the absence of diatom blooms in remote Pacific waters of the Southern Ocean. Mar. Chem. 66: 1-34.		day and month are guesses
4	15	1995	-89.5	-61	400	0	0.18	AntPac		de Baar, H.J.W., J.T.M. de Jong, R.F. Nolting, K.R. Timmermans, M.A. van Leeuwe, U. Bathmann, M.R. van der Loeff, and J. Sildam, 1999. Low dissolved Fe and the absence of diatom blooms in remote Pacific waters of the Southern Ocean. Mar. Chem. 66: 1-34.		day and month are guesses
4	15	1995	-91.2	-65.4	600	0	0.25	AntPac		de Baar, H.J.W., J.T.M. de Jong, R.F. Nolting, K.R. Timmermans, M.A. van Leeuwe, U. Bathmann, M.R. van der Loeff, and J. Sildam, 1999. Low dissolved Fe and the absence of diatom blooms in remote Pacific waters of the Southern Ocean. Mar. Chem. 66: 1-34.		day and month are guesses
3	15	1995	-91.9	-58	600	0	0.3	AntPac		de Baar, H.J.W., J.T.M. de Jong, R.F. Nolting, K.R. Timmermans, M.A. van Leeuwe, U. Bathmann, M.R. van der Loeff, and J. Sildam, 1999. Low dissolved Fe and the absence of diatom blooms in remote Pacific waters of the Southern Ocean. Mar. Chem. 66: 1-34.		day and month are guesses
4	15	1995	-89.5	-61	600	0	0.23	AntPac		de Baar, H.J.W., J.T.M. de Jong, R.F. Nolting, K.R. Timmermans, M.A. van Leeuwe, U. Bathmann, M.R. van der Loeff, and J. Sildam, 1999. Low dissolved Fe and the absence of diatom blooms in remote Pacific waters of the Southern Ocean. Mar. Chem. 66: 1-34.		day and month are guesses
3	15	1995	-91.2	-57.3	600	0	0.2	AntPac		de Baar, H.J.W., J.T.M. de Jong, R.F. Nolting, K.R. Timmermans, M.A. van Leeuwe, U. Bathmann, M.R. van der Loeff, and J. Sildam, 1999. Low dissolved Fe and the absence of diatom blooms in remote Pacific waters of the Southern Ocean. Mar. Chem. 66: 1-34.		day and month are guesses
4	15	1995	-89.4	-68.3	600	0	0.39	AntPac		de Baar, H.J.W., J.T.M. de Jong, R.F. Nolting, K.R. Timmermans, M.A. van Leeuwe, U. Bathmann, M.R. van der Loeff, and J. Sildam, 1999. Low dissolved Fe and the absence of diatom blooms in remote Pacific waters of the Southern Ocean. Mar. Chem. 66: 1-34.		day and month are guesses
4	15	1995	-97.2	-68.5	600	0	0.19	AntPac		de Baar, H.J.W., J.T.M. de Jong, R.F. Nolting, K.R. Timmermans, M.A. van Leeuwe, U. Bathmann, M.R. van der Loeff, and J. Sildam, 1999. Low dissolved Fe and the absence of diatom blooms in remote Pacific waters of the Southern Ocean. Mar. Chem. 66: 1-34.		day and month are guesses
3	15	1995	-89.4	-51.9	600	0	0.32	AntPac		de Baar, H.J.W., J.T.M. de Jong, R.F. Nolting, K.R. Timmermans, M.A. van Leeuwe, U. Bathmann, M.R. van der Loeff, and J. Sildam, 1999. Low dissolved Fe and the absence of diatom blooms in remote Pacific waters of the Southern Ocean. Mar. Chem. 66: 1-34.		day and month are guesses
4	15	1995	-89.5	-64	600	0	0.28	AntPac		de Baar, H.J.W., J.T.M. de Jong, R.F. Nolting, K.R. Timmermans, M.A. van Leeuwe, U. Bathmann, M.R. van der Loeff, and J. Sildam, 1999. Low dissolved Fe and the absence of diatom blooms in remote Pacific waters of the Southern Ocean. Mar. Chem. 66: 1-34.		day and month are guesses
3	15	1995	-96.1	-59.7	800	0	0.32	AntPac		de Baar, H.J.W., J.T.M. de Jong, R.F. Nolting, K.R. Timmermans, M.A. van Leeuwe, U. Bathmann, M.R. van der Loeff, and J. Sildam, 1999. Low dissolved Fe and the absence of diatom blooms in remote Pacific waters of the Southern Ocean. Mar. Chem. 66: 1-34.		day and month are guesses
4	15	1995	-89.4	-68.3	800	0	0.47	AntPac		de Baar, H.J.W., J.T.M. de Jong, R.F. Nolting, K.R. Timmermans, M.A. van Leeuwe, U. Bathmann, M.R. van der Loeff, and J. Sildam, 1999. Low dissolved Fe and the absence of diatom blooms in remote Pacific waters of the Southern Ocean. Mar. Chem. 66: 1-34.		day and month are guesses
4	15	1995	-97.2	-68.5	800	0	0.31	AntPac		de Baar, H.J.W., J.T.M. de Jong, R.F. Nolting, K.R. Timmermans, M.A. van Leeuwe, U. Bathmann, M.R. van der Loeff, and J. Sildam, 1999. Low dissolved Fe and the absence of diatom blooms in remote Pacific waters of the Southern Ocean. Mar. Chem. 66: 1-34.		day and month are guesses
4	15	1995	-91.2	-65.4	800	0	0.21	AntPac		de Baar, H.J.W., J.T.M. de Jong, R.F. Nolting, K.R. Timmermans, M.A. van Leeuwe, U. Bathmann, M.R. van der Loeff, and J. Sildam, 1999. Low dissolved Fe and the absence of diatom blooms in remote Pacific waters of the Southern Ocean. Mar. Chem. 66: 1-34.		day and month are guesses
3	15	1995	-89.7	-54.3	800	0	0.2	AntPac		de Baar, H.J.W., J.T.M. de Jong, R.F. Nolting, K.R. Timmermans, M.A. van Leeuwe, U. Bathmann, M.R. van der Loeff, and J. Sildam, 1999. Low dissolved Fe and the absence of diatom blooms in remote Pacific waters of the Southern Ocean. Mar. Chem. 66: 1-34.		day and month are guesses
3	15	1995	-91.2	-57.3	800	0	0.23	AntPac		de Baar, H.J.W., J.T.M. de Jong, R.F. Nolting, K.R. Timmermans, M.A. van Leeuwe, U. Bathmann, M.R. van der Loeff, and J. Sildam, 1999. Low dissolved Fe and the absence of diatom blooms in remote Pacific waters of the Southern Ocean. Mar. Chem. 66: 1-34.		day and month are guesses
4	15	1995	-89.5	-64	800	0	0.33	AntPac		de Baar, H.J.W., J.T.M. de Jong, R.F. Nolting, K.R. Timmermans, M.A. van Leeuwe, U. Bathmann, M.R. van der Loeff, and J. Sildam, 1999. Low dissolved Fe and the absence of diatom blooms in remote Pacific waters of the Southern Ocean. Mar. Chem. 66: 1-34.		day and month are guesses
4	15	1995	-89.5	-61	800	0	0.26	AntPac		de Baar, H.J.W., J.T.M. de Jong, R.F. Nolting, K.R. Timmermans, M.A. van Leeuwe, U. Bathmann, M.R. van der Loeff, and J. Sildam, 1999. Low dissolved Fe and the absence of diatom blooms in remote Pacific waters of the Southern Ocean. Mar. Chem. 66: 1-34.		day and month are guesses
3	15	1995	-91.9	-58	800	0	0.47	AntPac		de Baar, H.J.W., J.T.M. de Jong, R.F. Nolting, K.R. Timmermans, M.A. van Leeuwe, U. Bathmann, M.R. van der Loeff, and J. Sildam, 1999. Low dissolved Fe and the absence of diatom blooms in remote Pacific waters of the Southern Ocean. Mar. Chem. 66: 1-34.		day and month are guesses
12		1995	10	-50	0	0	0.15	AntAtl		De Jong, J., den Das, J., Bathmann, U., Stoll, M., Kattner, G., Nolting, R. And de Baar, H. 1998 Dissolved iron at subnanomolar levels in the Southern Ocean as determined by ship-board analysis. Anal. Chim. Acta, 377,113-124
12		1995	10	-50	100	0	0.11	AntAtl		De Jong, J., den Das, J., Bathmann, U., Stoll, M., Kattner, G., Nolting, R. And de Baar, H. 1998 Dissolved iron at subnanomolar levels in the Southern Ocean as determined by ship-board analysis. Anal. Chim. Acta, 377,113-124
12		1995	10	-50	200	0	0.12	AntAtl		De Jong, J., den Das, J., Bathmann, U., Stoll, M., Kattner, G., Nolting, R. And de Baar, H. 1998 Dissolved iron at subnanomolar levels in the Southern Ocean as determined by ship-board analysis. Anal. Chim. Acta, 377,113-124
12		1995	10	-50	300	0	0.2	AntAtl		De Jong, J., den Das, J., Bathmann, U., Stoll, M., Kattner, G., Nolting, R. And de Baar, H. 1998 Dissolved iron at subnanomolar levels in the Southern Ocean as determined by ship-board analysis. Anal. Chim. Acta, 377,113-124
12		1995	10	-50	400	0	0.25	AntAtl		De Jong, J., den Das, J., Bathmann, U., Stoll, M., Kattner, G., Nolting, R. And de Baar, H. 1998 Dissolved iron at subnanomolar levels in the Southern Ocean as determined by ship-board analysis. Anal. Chim. Acta, 377,113-124
12		1995	10	-50	500	0	0.33	AntAtl		De Jong, J., den Das, J., Bathmann, U., Stoll, M., Kattner, G., Nolting, R. And de Baar, H. 1998 Dissolved iron at subnanomolar levels in the Southern Ocean as determined by ship-board analysis. Anal. Chim. Acta, 377,113-124
4		2001	-158	22.6	0		0.67	NCPac		E. Boyle, Bergquist, B., Kayser, R. And Wu, J. 2004. Iron, Manganese and Lead at Hawaii Ocean Time-series Station ALOHA: Temporal variability and an intermediate water hydrothermal plume. Submitted to GCA.
7		2001	-158	22.6	10		0.42	NCPac		E. Boyle, Bergquist, B., Kayser, R. And Wu, J. 2004. Iron, Manganese and Lead at Hawaii Ocean Time-series Station ALOHA: Temporal variability and an intermediate water hydrothermal plume. Submitted to GCA.
7		2002	-158	22.6	10		0.47	NCPac		E. Boyle, Bergquist, B., Kayser, R. And Wu, J. 2004. Iron, Manganese and Lead at Hawaii Ocean Time-series Station ALOHA: Temporal variability and an intermediate water hydrothermal plume. Submitted to GCA.
4		2001	-158	22.6	20		0.76	NCPac		E. Boyle, Bergquist, B., Kayser, R. And Wu, J. 2004. Iron, Manganese and Lead at Hawaii Ocean Time-series Station ALOHA: Temporal variability and an intermediate water hydrothermal plume. Submitted to GCA.
7		2002	-158	22.6	20		0.33	NCPac		E. Boyle, Bergquist, B., Kayser, R. And Wu, J. 2004. Iron, Manganese and Lead at Hawaii Ocean Time-series Station ALOHA: Temporal variability and an intermediate water hydrothermal plume. Submitted to GCA.
7		2002	-158	22.6	30		0.455	NCPac		E. Boyle, Bergquist, B., Kayser, R. And Wu, J. 2004. Iron, Manganese and Lead at Hawaii Ocean Time-series Station ALOHA: Temporal variability and an intermediate water hydrothermal plume. Submitted to GCA.
7		2002	-158	22.6	70		0.28	NCPac		E. Boyle, Bergquist, B., Kayser, R. And Wu, J. 2004. Iron, Manganese and Lead at Hawaii Ocean Time-series Station ALOHA: Temporal variability and an intermediate water hydrothermal plume. Submitted to GCA.
4		2001	-158	22.6	75		0.42	NCPac		E. Boyle, Bergquist, B., Kayser, R. And Wu, J. 2004. Iron, Manganese and Lead at Hawaii Ocean Time-series Station ALOHA: Temporal variability and an intermediate water hydrothermal plume. Submitted to GCA.
7		2002	-158	22.6	110		0.09	NCPac		E. Boyle, Bergquist, B., Kayser, R. And Wu, J. 2004. Iron, Manganese and Lead at Hawaii Ocean Time-series Station ALOHA: Temporal variability and an intermediate water hydrothermal plume. Submitted to GCA.
4		2001	-158	22.6	350		0.41	NCPac		E. Boyle, Bergquist, B., Kayser, R. And Wu, J. 2004. Iron, Manganese and Lead at Hawaii Ocean Time-series Station ALOHA: Temporal variability and an intermediate water hydrothermal plume. Submitted to GCA.
4		2001	-158	22.6	500		0.45	NCPac		E. Boyle, Bergquist, B., Kayser, R. And Wu, J. 2004. Iron, Manganese and Lead at Hawaii Ocean Time-series Station ALOHA: Temporal variability and an intermediate water hydrothermal plume. Submitted to GCA.
4		2001	-158	22.6	750		0.51	NCPac		E. Boyle, Bergquist, B., Kayser, R. And Wu, J. 2004. Iron, Manganese and Lead at Hawaii Ocean Time-series Station ALOHA: Temporal variability and an intermediate water hydrothermal plume. Submitted to GCA.
7		2002	-158	22.6	1000		0.87	NCPac		E. Boyle, Bergquist, B., Kayser, R. And Wu, J. 2004. Iron, Manganese and Lead at Hawaii Ocean Time-series Station ALOHA: Temporal variability and an intermediate water hydrothermal plume. Submitted to GCA.
4		2001	-158	22.6	1000		0.48	NCPac		E. Boyle, Bergquist, B., Kayser, R. And Wu, J. 2004. Iron, Manganese and Lead at Hawaii Ocean Time-series Station ALOHA: Temporal variability and an intermediate water hydrothermal plume. Submitted to GCA.
4		2001	-158	22.6	1100		0.78	NCPac		E. Boyle, Bergquist, B., Kayser, R. And Wu, J. 2004. Iron, Manganese and Lead at Hawaii Ocean Time-series Station ALOHA: Temporal variability and an intermediate water hydrothermal plume. Submitted to GCA.
7		2002	-158	22.6	1250		1.03	NCPac		E. Boyle, Bergquist, B., Kayser, R. And Wu, J. 2004. Iron, Manganese and Lead at Hawaii Ocean Time-series Station ALOHA: Temporal variability and an intermediate water hydrothermal plume. Submitted to GCA.
4		2001	-158	22.6	1250		0.67	NCPac		E. Boyle, Bergquist, B., Kayser, R. And Wu, J. 2004. Iron, Manganese and Lead at Hawaii Ocean Time-series Station ALOHA: Temporal variability and an intermediate water hydrothermal plume. Submitted to GCA.
4		2001	-158	22.6	1500		0.6	NCPac		E. Boyle, Bergquist, B., Kayser, R. And Wu, J. 2004. Iron, Manganese and Lead at Hawaii Ocean Time-series Station ALOHA: Temporal variability and an intermediate water hydrothermal plume. Submitted to GCA.
7		2002	-158	22.6	1500		0.77	NCPac		E. Boyle, Bergquist, B., Kayser, R. And Wu, J. 2004. Iron, Manganese and Lead at Hawaii Ocean Time-series Station ALOHA: Temporal variability and an intermediate water hydrothermal plume. Submitted to GCA.
4		2001	-158	22.6	1500		0.68	NCPac		E. Boyle, Bergquist, B., Kayser, R. And Wu, J. 2004. Iron, Manganese and Lead at Hawaii Ocean Time-series Station ALOHA: Temporal variability and an intermediate water hydrothermal plume. Submitted to GCA.
7		2002	-158	22.6	1750		0.79	NCPac		E. Boyle, Bergquist, B., Kayser, R. And Wu, J. 2004. Iron, Manganese and Lead at Hawaii Ocean Time-series Station ALOHA: Temporal variability and an intermediate water hydrothermal plume. Submitted to GCA.
4		2001	-158	22.6	2000		0.6	NCPac		E. Boyle, Bergquist, B., Kayser, R. And Wu, J. 2004. Iron, Manganese and Lead at Hawaii Ocean Time-series Station ALOHA: Temporal variability and an intermediate water hydrothermal plume. Submitted to GCA.
7		2002	-158	22.6	2500		0.49	NCPac		E. Boyle, Bergquist, B., Kayser, R. And Wu, J. 2004. Iron, Manganese and Lead at Hawaii Ocean Time-series Station ALOHA: Temporal variability and an intermediate water hydrothermal plume. Submitted to GCA.
4		2001	-158	22.6	3000		0.42	NCPac		E. Boyle, Bergquist, B., Kayser, R. And Wu, J. 2004. Iron, Manganese and Lead at Hawaii Ocean Time-series Station ALOHA: Temporal variability and an intermediate water hydrothermal plume. Submitted to GCA.
7		2002	-158	22.6	3000		0.5	NCPac		E. Boyle, Bergquist, B., Kayser, R. And Wu, J. 2004. Iron, Manganese and Lead at Hawaii Ocean Time-series Station ALOHA: Temporal variability and an intermediate water hydrothermal plume. Submitted to GCA.
4		2001	-158	22.6	4000		0.42	NCPac		E. Boyle, Bergquist, B., Kayser, R. And Wu, J. 2004. Iron, Manganese and Lead at Hawaii Ocean Time-series Station ALOHA: Temporal variability and an intermediate water hydrothermal plume. Submitted to GCA.
7		2002	-158	22.6	4000		0.45	NCPac		E. Boyle, Bergquist, B., Kayser, R. And Wu, J. 2004. Iron, Manganese and Lead at Hawaii Ocean Time-series Station ALOHA: Temporal variability and an intermediate water hydrothermal plume. Submitted to GCA.
4	9	1992	-140	0	25		0.03	FeLINE II		Fitzwater, S.E., K.H. Coale, R.M. Gordon, K.S. Johnson, M.E. Ondrusek, 1996, Iron deficiency and phytoplankton growth in the equatorial Pacific, Deep-Sea Res. II, 43, 995-1015
9	29	1992	-140	-5	25		0.15	Eqpac		Fitzwater, S.E., K.H. Coale, R.M. Gordon, K.S. Johnson, M.E. Ondrusek, 1996, Iron deficiency and phytoplankton growth in the equatorial Pacific, Deep-Sea Res. II, 43, 995-1015
4	5	1992	-140	0	25		0.2	FeLINE II		Fitzwater, S.E., K.H. Coale, R.M. Gordon, K.S. Johnson, M.E. Ondrusek, 1996, Iron deficiency and phytoplankton growth in the equatorial Pacific, Deep-Sea Res. II, 43, 995-1015
10	4	1992	-140	0	25		0.25	Eqpac		Fitzwater, S.E., K.H. Coale, R.M. Gordon, K.S. Johnson, M.E. Ondrusek, 1996, Iron deficiency and phytoplankton growth in the equatorial Pacific, Deep-Sea Res. II, 43, 995-1015
3	26-28	1992	-140	0	40		0.28	FeLINE II		Fitzwater, S.E., K.H. Coale, R.M. Gordon, K.S. Johnson, M.E. Ondrusek, 1996, Iron deficiency and phytoplankton growth in the equatorial Pacific, Deep-Sea Res. II, 43, 995-1015
1		1990	163.9	-76.5	0.5	0.25	0.256	RossSea		Fitzwater, S.E., K.S. Johnson, R.M. Gordon, K.H. Coale, W.O. Smith, 2000, Trace metal concentration in the Ross Sea and their relationship with nutrients and phytoplankton growth, Deep-Sea Res. II, 47, 3159-3179
1		1990	167.5	-76.5	10	0.07	0.07168	RossSea		Fitzwater, S.E., K.S. Johnson, R.M. Gordon, K.H. Coale, W.O. Smith, 2000, Trace metal concentration in the Ross Sea and their relationship with nutrients and phytoplankton growth, Deep-Sea Res. II, 47, 3159-3179
1		1990	173.3	-76.5	15	0.05	0.0512	RossSea		Fitzwater, S.E., K.S. Johnson, R.M. Gordon, K.H. Coale, W.O. Smith, 2000, Trace metal concentration in the Ross Sea and their relationship with nutrients and phytoplankton growth, Deep-Sea Res. II, 47, 3159-3179
1		1990	-174	-72.5	20	0.1	0.1024	RossSea		Fitzwater, S.E., K.S. Johnson, R.M. Gordon, K.H. Coale, W.O. Smith, 2000, Trace metal concentration in the Ross Sea and their relationship with nutrients and phytoplankton growth, Deep-Sea Res. II, 47, 3159-3179
1		1990	-175	-76.5	20	0.08	0.08192	RossSea		Fitzwater, S.E., K.S. Johnson, R.M. Gordon, K.H. Coale, W.O. Smith, 2000, Trace metal concentration in the Ross Sea and their relationship with nutrients and phytoplankton growth, Deep-Sea Res. II, 47, 3159-3179
1		1990	-178.47	-72.5	20	0.06	0.06144	RossSea		Fitzwater, S.E., K.S. Johnson, R.M. Gordon, K.H. Coale, W.O. Smith, 2000, Trace metal concentration in the Ross Sea and their relationship with nutrients and phytoplankton growth, Deep-Sea Res. II, 47, 3159-3179
1		1990	177	-72.5	20	0.05	0.0512	RossSea		Fitzwater, S.E., K.S. Johnson, R.M. Gordon, K.H. Coale, W.O. Smith, 2000, Trace metal concentration in the Ross Sea and their relationship with nutrients and phytoplankton growth, Deep-Sea Res. II, 47, 3159-3179
1		1990	179.65	-76.5	20	0.09	0.09216	RossSea		Fitzwater, S.E., K.S. Johnson, R.M. Gordon, K.H. Coale, W.O. Smith, 2000, Trace metal concentration in the Ross Sea and their relationship with nutrients and phytoplankton growth, Deep-Sea Res. II, 47, 3159-3179
1		1990	167.5	-76.5	30	0.09	0.09216	RossSea		Fitzwater, S.E., K.S. Johnson, R.M. Gordon, K.H. Coale, W.O. Smith, 2000, Trace metal concentration in the Ross Sea and their relationship with nutrients and phytoplankton growth, Deep-Sea Res. II, 47, 3159-3179
1		1990	163.9	-76.5	30	0.22	0.22528	RossSea		Fitzwater, S.E., K.S. Johnson, R.M. Gordon, K.H. Coale, W.O. Smith, 2000, Trace metal concentration in the Ross Sea and their relationship with nutrients and phytoplankton growth, Deep-Sea Res. II, 47, 3159-3179
1		1990	172.5	-72.5	30	0.05	0.0512	RossSea		Fitzwater, S.E., K.S. Johnson, R.M. Gordon, K.H. Coale, W.O. Smith, 2000, Trace metal concentration in the Ross Sea and their relationship with nutrients and phytoplankton growth, Deep-Sea Res. II, 47, 3159-3179
1		1990	173.3	-76.5	40	0.23	0.23552	RossSea		Fitzwater, S.E., K.S. Johnson, R.M. Gordon, K.H. Coale, W.O. Smith, 2000, Trace metal concentration in the Ross Sea and their relationship with nutrients and phytoplankton growth, Deep-Sea Res. II, 47, 3159-3179
1		1990	-178.47	-72.5	40	0.05	0.0512	RossSea		Fitzwater, S.E., K.S. Johnson, R.M. Gordon, K.H. Coale, W.O. Smith, 2000, Trace metal concentration in the Ross Sea and their relationship with nutrients and phytoplankton growth, Deep-Sea Res. II, 47, 3159-3179
1		1990	167.5	-76.5	45	0.12	0.12288	RossSea		Fitzwater, S.E., K.S. Johnson, R.M. Gordon, K.H. Coale, W.O. Smith, 2000, Trace metal concentration in the Ross Sea and their relationship with nutrients and phytoplankton growth, Deep-Sea Res. II, 47, 3159-3179
1		1990	177	-72.5	50	0.05	0.0512	RossSea		Fitzwater, S.E., K.S. Johnson, R.M. Gordon, K.H. Coale, W.O. Smith, 2000, Trace metal concentration in the Ross Sea and their relationship with nutrients and phytoplankton growth, Deep-Sea Res. II, 47, 3159-3179
1		1990	167.5	-76.5	55	0.26	0.26624	RossSea		Fitzwater, S.E., K.S. Johnson, R.M. Gordon, K.H. Coale, W.O. Smith, 2000, Trace metal concentration in the Ross Sea and their relationship with nutrients and phytoplankton growth, Deep-Sea Res. II, 47, 3159-3179
1		1990	172.5	-72.5	60	0.12	0.12288	RossSea		Fitzwater, S.E., K.S. Johnson, R.M. Gordon, K.H. Coale, W.O. Smith, 2000, Trace metal concentration in the Ross Sea and their relationship with nutrients and phytoplankton growth, Deep-Sea Res. II, 47, 3159-3179
1		1990	-174	-72.5	60	0.14	0.14336	RossSea		Fitzwater, S.E., K.S. Johnson, R.M. Gordon, K.H. Coale, W.O. Smith, 2000, Trace metal concentration in the Ross Sea and their relationship with nutrients and phytoplankton growth, Deep-Sea Res. II, 47, 3159-3179
1		1990	179.65	-76.5	60	0.16	0.16384	RossSea		Fitzwater, S.E., K.S. Johnson, R.M. Gordon, K.H. Coale, W.O. Smith, 2000, Trace metal concentration in the Ross Sea and their relationship with nutrients and phytoplankton growth, Deep-Sea Res. II, 47, 3159-3179
1		1990	-175	-76.5	60	0.06	0.06144	RossSea		Fitzwater, S.E., K.S. Johnson, R.M. Gordon, K.H. Coale, W.O. Smith, 2000, Trace metal concentration in the Ross Sea and their relationship with nutrients and phytoplankton growth, Deep-Sea Res. II, 47, 3159-3179
1		1990	173.3	-76.5	80	0.25	0.256	RossSea		Fitzwater, S.E., K.S. Johnson, R.M. Gordon, K.H. Coale, W.O. Smith, 2000, Trace metal concentration in the Ross Sea and their relationship with nutrients and phytoplankton growth, Deep-Sea Res. II, 47, 3159-3179
1		1990	-178.47	-72.5	100	0.13	0.13312	RossSea		Fitzwater, S.E., K.S. Johnson, R.M. Gordon, K.H. Coale, W.O. Smith, 2000, Trace metal concentration in the Ross Sea and their relationship with nutrients and phytoplankton growth, Deep-Sea Res. II, 47, 3159-3179
1		1990	179.65	-76.5	100	0.39	0.39936	RossSea		Fitzwater, S.E., K.S. Johnson, R.M. Gordon, K.H. Coale, W.O. Smith, 2000, Trace metal concentration in the Ross Sea and their relationship with nutrients and phytoplankton growth, Deep-Sea Res. II, 47, 3159-3179
1		1990	167.5	-76.5	100	0.21	0.21504	RossSea		Fitzwater, S.E., K.S. Johnson, R.M. Gordon, K.H. Coale, W.O. Smith, 2000, Trace metal concentration in the Ross Sea and their relationship with nutrients and phytoplankton growth, Deep-Sea Res. II, 47, 3159-3179
1		1990	177	-72.5	100	0.05	0.0512	RossSea		Fitzwater, S.E., K.S. Johnson, R.M. Gordon, K.H. Coale, W.O. Smith, 2000, Trace metal concentration in the Ross Sea and their relationship with nutrients and phytoplankton growth, Deep-Sea Res. II, 47, 3159-3179
1		1990	-175	-76.5	100	0.09	0.09216	RossSea		Fitzwater, S.E., K.S. Johnson, R.M. Gordon, K.H. Coale, W.O. Smith, 2000, Trace metal concentration in the Ross Sea and their relationship with nutrients and phytoplankton growth, Deep-Sea Res. II, 47, 3159-3179
1		1990	-174	-72.5	100	0.09	0.09216	RossSea		Fitzwater, S.E., K.S. Johnson, R.M. Gordon, K.H. Coale, W.O. Smith, 2000, Trace metal concentration in the Ross Sea and their relationship with nutrients and phytoplankton growth, Deep-Sea Res. II, 47, 3159-3179
1		1990	172.5	-72.5	120	0.05	0.0512	RossSea		Fitzwater, S.E., K.S. Johnson, R.M. Gordon, K.H. Coale, W.O. Smith, 2000, Trace metal concentration in the Ross Sea and their relationship with nutrients and phytoplankton growth, Deep-Sea Res. II, 47, 3159-3179
1		1990	-175	-76.5	150	0.12	0.12288	RossSea		Fitzwater, S.E., K.S. Johnson, R.M. Gordon, K.H. Coale, W.O. Smith, 2000, Trace metal concentration in the Ross Sea and their relationship with nutrients and phytoplankton growth, Deep-Sea Res. II, 47, 3159-3179
1		1990	179.65	-76.5	150	0.22	0.22528	RossSea		Fitzwater, S.E., K.S. Johnson, R.M. Gordon, K.H. Coale, W.O. Smith, 2000, Trace metal concentration in the Ross Sea and their relationship with nutrients and phytoplankton growth, Deep-Sea Res. II, 47, 3159-3179
1		1990	167.5	-76.5	150	0.41	0.41984	RossSea		Fitzwater, S.E., K.S. Johnson, R.M. Gordon, K.H. Coale, W.O. Smith, 2000, Trace metal concentration in the Ross Sea and their relationship with nutrients and phytoplankton growth, Deep-Sea Res. II, 47, 3159-3179
1		1990	173.3	-76.5	150	0.31	0.31744	RossSea		Fitzwater, S.E., K.S. Johnson, R.M. Gordon, K.H. Coale, W.O. Smith, 2000, Trace metal concentration in the Ross Sea and their relationship with nutrients and phytoplankton growth, Deep-Sea Res. II, 47, 3159-3179
1		1990	-174	-72.5	175	0.23	0.23552	RossSea		Fitzwater, S.E., K.S. Johnson, R.M. Gordon, K.H. Coale, W.O. Smith, 2000, Trace metal concentration in the Ross Sea and their relationship with nutrients and phytoplankton growth, Deep-Sea Res. II, 47, 3159-3179
1		1990	172.5	-72.5	180	0.46	0.47104	RossSea		Fitzwater, S.E., K.S. Johnson, R.M. Gordon, K.H. Coale, W.O. Smith, 2000, Trace metal concentration in the Ross Sea and their relationship with nutrients and phytoplankton growth, Deep-Sea Res. II, 47, 3159-3179
1		1990	177	-72.5	200	0.05	0.0512	RossSea		Fitzwater, S.E., K.S. Johnson, R.M. Gordon, K.H. Coale, W.O. Smith, 2000, Trace metal concentration in the Ross Sea and their relationship with nutrients and phytoplankton growth, Deep-Sea Res. II, 47, 3159-3179
1		1990	-178.47	-72.5	200	0.33	0.33792	RossSea		Fitzwater, S.E., K.S. Johnson, R.M. Gordon, K.H. Coale, W.O. Smith, 2000, Trace metal concentration in the Ross Sea and their relationship with nutrients and phytoplankton growth, Deep-Sea Res. II, 47, 3159-3179
1		1990	173.3	-76.5	250	0.31	0.31744	RossSea		Fitzwater, S.E., K.S. Johnson, R.M. Gordon, K.H. Coale, W.O. Smith, 2000, Trace metal concentration in the Ross Sea and their relationship with nutrients and phytoplankton growth, Deep-Sea Res. II, 47, 3159-3179
1		1990	-175	-76.5	250	0.23	0.23552	RossSea		Fitzwater, S.E., K.S. Johnson, R.M. Gordon, K.H. Coale, W.O. Smith, 2000, Trace metal concentration in the Ross Sea and their relationship with nutrients and phytoplankton growth, Deep-Sea Res. II, 47, 3159-3179
1		1990	179.65	-76.5	250	1.13	1.15712	RossSea		Fitzwater, S.E., K.S. Johnson, R.M. Gordon, K.H. Coale, W.O. Smith, 2000, Trace metal concentration in the Ross Sea and their relationship with nutrients and phytoplankton growth, Deep-Sea Res. II, 47, 3159-3179
1		1990	172.5	-72.5	250	0.43	0.44032	RossSea		Fitzwater, S.E., K.S. Johnson, R.M. Gordon, K.H. Coale, W.O. Smith, 2000, Trace metal concentration in the Ross Sea and their relationship with nutrients and phytoplankton growth, Deep-Sea Res. II, 47, 3159-3179
1		1990	-174	-72.5	275	0.17	0.17408	RossSea		Fitzwater, S.E., K.S. Johnson, R.M. Gordon, K.H. Coale, W.O. Smith, 2000, Trace metal concentration in the Ross Sea and their relationship with nutrients and phytoplankton growth, Deep-Sea Res. II, 47, 3159-3179
1		1990	-174	-72.5	375	0.23	0.23552	RossSea		Fitzwater, S.E., K.S. Johnson, R.M. Gordon, K.H. Coale, W.O. Smith, 2000, Trace metal concentration in the Ross Sea and their relationship with nutrients and phytoplankton growth, Deep-Sea Res. II, 47, 3159-3179
3		1991	-19.97	35.5	82		1.8	NATL		Gledhill, M., C.M.G. van den Berg, 1994, Determination of complexation of iron(III) with natural organic complexing ligands in seawater using cathodic stripping voltammetry, Mar. Chem., 47, 41-54
3		1991	-19.97	35.5	106		1.6	NATL		Gledhill, M., C.M.G. van den Berg, 1994, Determination of complexation of iron(III) with natural organic complexing ligands in seawater using cathodic stripping voltammetry, Mar. Chem., 47, 41-54
3		1991	-20.01	42.28	802		0.8	NATL		Gledhill, M., C.M.G. van den Berg, 1994, Determination of complexation of iron(III) with natural organic complexing ligands in seawater using cathodic stripping voltammetry, Mar. Chem., 47, 41-54
3		1991	-20.01	42.28	1002		0.85	NATL		Gledhill, M., C.M.G. van den Berg, 1994, Determination of complexation of iron(III) with natural organic complexing ligands in seawater using cathodic stripping voltammetry, Mar. Chem., 47, 41-54
11	14	1993	-93	0.4	20	0.05	0.0512	PlumEx		Gordon, R. M., Johnson, K. S. and Coale, K. H., 1998. The behavior of iron and other trace elements during the IronEx I and PlumEx experiments in the equatorial Pacific. Deep-Sea Res. II 45: 995-1041.
11	12	1993	-92	1	20	0.03	0.03072	PlumEx		Gordon, R. M., Johnson, K. S. and Coale, K. H., 1998. The behavior of iron and other trace elements during the IronEx I and PlumEx experiments in the equatorial Pacific. Deep-Sea Res. II 45: 995-1041.
11	15	1993	-93.47	0.4	20	0.04	0.04096	PlumEx		Gordon, R. M., Johnson, K. S. and Coale, K. H., 1998. The behavior of iron and other trace elements during the IronEx I and PlumEx experiments in the equatorial Pacific. Deep-Sea Res. II 45: 995-1041.
11	14	1993	-93	0.4	40	0.03	0.03072	PlumEx		Gordon, R. M., Johnson, K. S. and Coale, K. H., 1998. The behavior of iron and other trace elements during the IronEx I and PlumEx experiments in the equatorial Pacific. Deep-Sea Res. II 45: 995-1041.
11	15	1993	-93.47	0.4	40	0.02	0.02048	PlumEx		Gordon, R. M., Johnson, K. S. and Coale, K. H., 1998. The behavior of iron and other trace elements during the IronEx I and PlumEx experiments in the equatorial Pacific. Deep-Sea Res. II 45: 995-1041.
11	12	1993	-92	1	40	0.05	0.0512	PlumEx		Gordon, R. M., Johnson, K. S. and Coale, K. H., 1998. The behavior of iron and other trace elements during the IronEx I and PlumEx experiments in the equatorial Pacific. Deep-Sea Res. II 45: 995-1041.
11	15	1993	-93.47	0.4	60	0.03	0.03072	PlumEx		Gordon, R. M., Johnson, K. S. and Coale, K. H., 1998. The behavior of iron and other trace elements during the IronEx I and PlumEx experiments in the equatorial Pacific. Deep-Sea Res. II 45: 995-1041.
11	12	1993	-92	1	60	0.04	0.04096	PlumEx		Gordon, R. M., Johnson, K. S. and Coale, K. H., 1998. The behavior of iron and other trace elements during the IronEx I and PlumEx experiments in the equatorial Pacific. Deep-Sea Res. II 45: 995-1041.
11	14	1993	-93	0.4	60	0.08	0.08192	PlumEx		Gordon, R. M., Johnson, K. S. and Coale, K. H., 1998. The behavior of iron and other trace elements during the IronEx I and PlumEx experiments in the equatorial Pacific. Deep-Sea Res. II 45: 995-1041.
11	15	1993	-93.47	0.4	80	0.12	0.12288	PlumEx		Gordon, R. M., Johnson, K. S. and Coale, K. H., 1998. The behavior of iron and other trace elements during the IronEx I and PlumEx experiments in the equatorial Pacific. Deep-Sea Res. II 45: 995-1041.
11	12	1993	-92	1	80	0.08	0.08192	PlumEx		Gordon, R. M., Johnson, K. S. and Coale, K. H., 1998. The behavior of iron and other trace elements during the IronEx I and PlumEx experiments in the equatorial Pacific. Deep-Sea Res. II 45: 995-1041.
11	14	1993	-93	0.4	80	0.09	0.09216	PlumEx		Gordon, R. M., Johnson, K. S. and Coale, K. H., 1998. The behavior of iron and other trace elements during the IronEx I and PlumEx experiments in the equatorial Pacific. Deep-Sea Res. II 45: 995-1041.
11	12	1993	-92	1	100	0.13	0.13312	PlumEx		Gordon, R. M., Johnson, K. S. and Coale, K. H., 1998. The behavior of iron and other trace elements during the IronEx I and PlumEx experiments in the equatorial Pacific. Deep-Sea Res. II 45: 995-1041.
11	14	1993	-93	0.4	100	0.11	0.11264	PlumEx		Gordon, R. M., Johnson, K. S. and Coale, K. H., 1998. The behavior of iron and other trace elements during the IronEx I and PlumEx experiments in the equatorial Pacific. Deep-Sea Res. II 45: 995-1041.
11	15	1993	-93.47	0.4	100	0.1	0.1024	PlumEx		Gordon, R. M., Johnson, K. S. and Coale, K. H., 1998. The behavior of iron and other trace elements during the IronEx I and PlumEx experiments in the equatorial Pacific. Deep-Sea Res. II 45: 995-1041.
11	12	1993	-92	1	125	0.18	0.18432	PlumEx		Gordon, R. M., Johnson, K. S. and Coale, K. H., 1998. The behavior of iron and other trace elements during the IronEx I and PlumEx experiments in the equatorial Pacific. Deep-Sea Res. II 45: 995-1041.
11	15	1993	-93.47	0.4	125	0.16	0.16384	PlumEx		Gordon, R. M., Johnson, K. S. and Coale, K. H., 1998. The behavior of iron and other trace elements during the IronEx I and PlumEx experiments in the equatorial Pacific. Deep-Sea Res. II 45: 995-1041.
11	14	1993	-93	0.4	125	0.18	0.18432	PlumEx		Gordon, R. M., Johnson, K. S. and Coale, K. H., 1998. The behavior of iron and other trace elements during the IronEx I and PlumEx experiments in the equatorial Pacific. Deep-Sea Res. II 45: 995-1041.
11	15	1993	-93.47	0.4	150	0.17	0.17408	PlumEx		Gordon, R. M., Johnson, K. S. and Coale, K. H., 1998. The behavior of iron and other trace elements during the IronEx I and PlumEx experiments in the equatorial Pacific. Deep-Sea Res. II 45: 995-1041.
11	12	1993	-92	1	150	0.22	0.22528	PlumEx		Gordon, R. M., Johnson, K. S. and Coale, K. H., 1998. The behavior of iron and other trace elements during the IronEx I and PlumEx experiments in the equatorial Pacific. Deep-Sea Res. II 45: 995-1041.
10		1981	-108	18	0		0.14	NEPac		Gordon, R.M. , J.H. Martin, G.A. Knauer, 1982, Iron in north-east Pacific waters, Nature, 299, 611-612
10		1981	-108	18	5		0.13	NEPac		Gordon, R.M. , J.H. Martin, G.A. Knauer, 1982, Iron in north-east Pacific waters, Nature, 299, 611-612
10		1981	-108	18	20		0.16	NEPac		Gordon, R.M. , J.H. Martin, G.A. Knauer, 1982, Iron in north-east Pacific waters, Nature, 299, 611-612
10		1981	-108	18	30		0.64	NEPac		Gordon, R.M. , J.H. Martin, G.A. Knauer, 1982, Iron in north-east Pacific waters, Nature, 299, 611-612
10		1981	-108	18	50		0.73	NEPac		Gordon, R.M. , J.H. Martin, G.A. Knauer, 1982, Iron in north-east Pacific waters, Nature, 299, 611-612
10		1981	-108	18	60		0.54	NEPac		Gordon, R.M. , J.H. Martin, G.A. Knauer, 1982, Iron in north-east Pacific waters, Nature, 299, 611-612
10		1981	-108	18	70		1.8	NEPac		Gordon, R.M. , J.H. Martin, G.A. Knauer, 1982, Iron in north-east Pacific waters, Nature, 299, 611-612
10		1981	-108	18	80		2.2	NEPac		Gordon, R.M. , J.H. Martin, G.A. Knauer, 1982, Iron in north-east Pacific waters, Nature, 299, 611-612
10		1981	-108	18	90		2.6	NEPac		Gordon, R.M. , J.H. Martin, G.A. Knauer, 1982, Iron in north-east Pacific waters, Nature, 299, 611-612
10		1981	-108	18	100		0.92	NEPac		Gordon, R.M. , J.H. Martin, G.A. Knauer, 1982, Iron in north-east Pacific waters, Nature, 299, 611-612
10		1981	-108	18	110		1.1	NEPac		Gordon, R.M. , J.H. Martin, G.A. Knauer, 1982, Iron in north-east Pacific waters, Nature, 299, 611-612
10		1981	-108	18	120		1.3	NEPac		Gordon, R.M. , J.H. Martin, G.A. Knauer, 1982, Iron in north-east Pacific waters, Nature, 299, 611-612
10		1981	-108	18	130		1.5	NEPac		Gordon, R.M. , J.H. Martin, G.A. Knauer, 1982, Iron in north-east Pacific waters, Nature, 299, 611-612
10		1981	-108	18	150		1.8	NEPac		Gordon, R.M. , J.H. Martin, G.A. Knauer, 1982, Iron in north-east Pacific waters, Nature, 299, 611-612
10		1981	-108	18	160		1.6	NEPac		Gordon, R.M. , J.H. Martin, G.A. Knauer, 1982, Iron in north-east Pacific waters, Nature, 299, 611-612
10		1981	-108	18	175		1.6	NEPac		Gordon, R.M. , J.H. Martin, G.A. Knauer, 1982, Iron in north-east Pacific waters, Nature, 299, 611-612
10		1981	-108	18	195		0.74	NEPac		Gordon, R.M. , J.H. Martin, G.A. Knauer, 1982, Iron in north-east Pacific waters, Nature, 299, 611-612
10		1981	-108	18	220		0.91	NEPac		Gordon, R.M. , J.H. Martin, G.A. Knauer, 1982, Iron in north-east Pacific waters, Nature, 299, 611-612
10		1981	-108	18	245		0.52	NEPac		Gordon, R.M. , J.H. Martin, G.A. Knauer, 1982, Iron in north-east Pacific waters, Nature, 299, 611-612
10		1981	-108	18	295		1	NEPac		Gordon, R.M. , J.H. Martin, G.A. Knauer, 1982, Iron in north-east Pacific waters, Nature, 299, 611-612
10		1981	-108	18	395		0.68	NEPac		Gordon, R.M. , J.H. Martin, G.A. Knauer, 1982, Iron in north-east Pacific waters, Nature, 299, 611-612
10		1981	-108	18	490		0.95	NEPac		Gordon, R.M. , J.H. Martin, G.A. Knauer, 1982, Iron in north-east Pacific waters, Nature, 299, 611-612
10		1981	-108	18	590		0.76	NEPac		Gordon, R.M. , J.H. Martin, G.A. Knauer, 1982, Iron in north-east Pacific waters, Nature, 299, 611-612
10		1981	-108	18	690		0.4	NEPac		Gordon, R.M. , J.H. Martin, G.A. Knauer, 1982, Iron in north-east Pacific waters, Nature, 299, 611-612
10		1981	-108	18	785		0.72	NEPac		Gordon, R.M. , J.H. Martin, G.A. Knauer, 1982, Iron in north-east Pacific waters, Nature, 299, 611-612
10		1981	-108	18	880		0.7	NEPac		Gordon, R.M. , J.H. Martin, G.A. Knauer, 1982, Iron in north-east Pacific waters, Nature, 299, 611-612
10		1981	-108	18	980		0.8	NEPac		Gordon, R.M. , J.H. Martin, G.A. Knauer, 1982, Iron in north-east Pacific waters, Nature, 299, 611-612
10		1981	-108	18	1955		0.6	NEPac		Gordon, R.M. , J.H. Martin, G.A. Knauer, 1982, Iron in north-east Pacific waters, Nature, 299, 611-612
11	18	1993	-92	0	20	0.1	0.1024	PLUMEX		Gordon, R.M., K.S. Johnson, K.H. Coale, 1998, The behaviour of iron and other trace elements during the IronEx-I and PlumEx experiments in the Equatorial Pacific, Deep-Sea Res. II, 45, 995-1041			lat/lon approximate
11	14	1993	-93	0.4	20	0.05	0.0512	PLUMEX		Gordon, R.M., K.S. Johnson, K.H. Coale, 1998, The behaviour of iron and other trace elements during the IronEx-I and PlumEx experiments in the Equatorial Pacific, Deep-Sea Res. II, 45, 995-1041			lat/lon approximate
11	11	1993	-89	0.5	20	0.06	0.06144	PLUMEX		Gordon, R.M., K.S. Johnson, K.H. Coale, 1998, The behaviour of iron and other trace elements during the IronEx-I and PlumEx experiments in the Equatorial Pacific, Deep-Sea Res. II, 45, 995-1041			lat/lon approximate
11	17	1993	-93	0.27	20	0.06	0.06144	PLUMEX		Gordon, R.M., K.S. Johnson, K.H. Coale, 1998, The behaviour of iron and other trace elements during the IronEx-I and PlumEx experiments in the Equatorial Pacific, Deep-Sea Res. II, 45, 995-1041			lat/lon approximate
11	12	1993	-92	1	20	0.03	0.03072	PLUMEX		Gordon, R.M., K.S. Johnson, K.H. Coale, 1998, The behaviour of iron and other trace elements during the IronEx-I and PlumEx experiments in the Equatorial Pacific, Deep-Sea Res. II, 45, 995-1041			lat/lon approximate
11	9	1993	-89	0	20	0.04	0.04096	PLUMEX		Gordon, R.M., K.S. Johnson, K.H. Coale, 1998, The behaviour of iron and other trace elements during the IronEx-I and PlumEx experiments in the Equatorial Pacific, Deep-Sea Res. II, 45, 995-1041			lat/lon approximate
11	10	1993	-89	-0.5	20	0.02	0.02048	PLUMEX		Gordon, R.M., K.S. Johnson, K.H. Coale, 1998, The behaviour of iron and other trace elements during the IronEx-I and PlumEx experiments in the Equatorial Pacific, Deep-Sea Res. II, 45, 995-1041			lat/lon approximate
11	15	1993	-93	0.4	20	0.04	0.04096	PLUMEX		Gordon, R.M., K.S. Johnson, K.H. Coale, 1998, The behaviour of iron and other trace elements during the IronEx-I and PlumEx experiments in the Equatorial Pacific, Deep-Sea Res. II, 45, 995-1041			lat/lon approximate
11	15	1993	-93	0.4	40	0.02	0.02048	PLUMEX		Gordon, R.M., K.S. Johnson, K.H. Coale, 1998, The behaviour of iron and other trace elements during the IronEx-I and PlumEx experiments in the Equatorial Pacific, Deep-Sea Res. II, 45, 995-1041			lat/lon approximate
11	10	1993	-89	-0.5	40	0.04	0.04096	PLUMEX		Gordon, R.M., K.S. Johnson, K.H. Coale, 1998, The behaviour of iron and other trace elements during the IronEx-I and PlumEx experiments in the Equatorial Pacific, Deep-Sea Res. II, 45, 995-1041			lat/lon approximate
11	11	1993	-89	0.5	40	0.04	0.04096	PLUMEX		Gordon, R.M., K.S. Johnson, K.H. Coale, 1998, The behaviour of iron and other trace elements during the IronEx-I and PlumEx experiments in the Equatorial Pacific, Deep-Sea Res. II, 45, 995-1041			lat/lon approximate
11	17	1993	-93	0.27	40	0.1	0.1024	PLUMEX		Gordon, R.M., K.S. Johnson, K.H. Coale, 1998, The behaviour of iron and other trace elements during the IronEx-I and PlumEx experiments in the Equatorial Pacific, Deep-Sea Res. II, 45, 995-1041			lat/lon approximate
11	9	1993	-89	0	40	0.08	0.08192	PLUMEX		Gordon, R.M., K.S. Johnson, K.H. Coale, 1998, The behaviour of iron and other trace elements during the IronEx-I and PlumEx experiments in the Equatorial Pacific, Deep-Sea Res. II, 45, 995-1041			lat/lon approximate
11	12	1993	-92	1	40	0.05	0.0512	PLUMEX		Gordon, R.M., K.S. Johnson, K.H. Coale, 1998, The behaviour of iron and other trace elements during the IronEx-I and PlumEx experiments in the Equatorial Pacific, Deep-Sea Res. II, 45, 995-1041			lat/lon approximate
11	18	1993	-92	0	40	0.14	0.14336	PLUMEX		Gordon, R.M., K.S. Johnson, K.H. Coale, 1998, The behaviour of iron and other trace elements during the IronEx-I and PlumEx experiments in the Equatorial Pacific, Deep-Sea Res. II, 45, 995-1041			lat/lon approximate
11	14	1993	-93	0.4	40	0.03	0.03072	PLUMEX		Gordon, R.M., K.S. Johnson, K.H. Coale, 1998, The behaviour of iron and other trace elements during the IronEx-I and PlumEx experiments in the Equatorial Pacific, Deep-Sea Res. II, 45, 995-1041			lat/lon approximate
11	12	1993	-92	1	60	0.04	0.04096	PLUMEX		Gordon, R.M., K.S. Johnson, K.H. Coale, 1998, The behaviour of iron and other trace elements during the IronEx-I and PlumEx experiments in the Equatorial Pacific, Deep-Sea Res. II, 45, 995-1041			lat/lon approximate
11	11	1993	-89	0.5	60	0.09	0.09216	PLUMEX		Gordon, R.M., K.S. Johnson, K.H. Coale, 1998, The behaviour of iron and other trace elements during the IronEx-I and PlumEx experiments in the Equatorial Pacific, Deep-Sea Res. II, 45, 995-1041			lat/lon approximate
11	15	1993	-93	0.4	60	0.03	0.03072	PLUMEX		Gordon, R.M., K.S. Johnson, K.H. Coale, 1998, The behaviour of iron and other trace elements during the IronEx-I and PlumEx experiments in the Equatorial Pacific, Deep-Sea Res. II, 45, 995-1041			lat/lon approximate
11	18	1993	-92	0	60	0.13	0.13312	PLUMEX		Gordon, R.M., K.S. Johnson, K.H. Coale, 1998, The behaviour of iron and other trace elements during the IronEx-I and PlumEx experiments in the Equatorial Pacific, Deep-Sea Res. II, 45, 995-1041			lat/lon approximate
11	14	1993	-93	0.4	60	0.08	0.08192	PLUMEX		Gordon, R.M., K.S. Johnson, K.H. Coale, 1998, The behaviour of iron and other trace elements during the IronEx-I and PlumEx experiments in the Equatorial Pacific, Deep-Sea Res. II, 45, 995-1041			lat/lon approximate
11	9	1993	-89	0	60	0.2	0.2048	PLUMEX		Gordon, R.M., K.S. Johnson, K.H. Coale, 1998, The behaviour of iron and other trace elements during the IronEx-I and PlumEx experiments in the Equatorial Pacific, Deep-Sea Res. II, 45, 995-1041			lat/lon approximate
11	17	1993	-93	0.27	60	0.08	0.08192	PLUMEX		Gordon, R.M., K.S. Johnson, K.H. Coale, 1998, The behaviour of iron and other trace elements during the IronEx-I and PlumEx experiments in the Equatorial Pacific, Deep-Sea Res. II, 45, 995-1041			lat/lon approximate
11	10	1993	-89	-0.5	60	0.06	0.06144	PLUMEX		Gordon, R.M., K.S. Johnson, K.H. Coale, 1998, The behaviour of iron and other trace elements during the IronEx-I and PlumEx experiments in the Equatorial Pacific, Deep-Sea Res. II, 45, 995-1041			lat/lon approximate
11	9	1993	-89	0	80	0.2	0.2048	PLUMEX		Gordon, R.M., K.S. Johnson, K.H. Coale, 1998, The behaviour of iron and other trace elements during the IronEx-I and PlumEx experiments in the Equatorial Pacific, Deep-Sea Res. II, 45, 995-1041			lat/lon approximate
11	10	1993	-89	-0.5	80	0.08	0.08192	PLUMEX		Gordon, R.M., K.S. Johnson, K.H. Coale, 1998, The behaviour of iron and other trace elements during the IronEx-I and PlumEx experiments in the Equatorial Pacific, Deep-Sea Res. II, 45, 995-1041			lat/lon approximate
11	17	1993	-93	0.27	80	0.1	0.1024	PLUMEX		Gordon, R.M., K.S. Johnson, K.H. Coale, 1998, The behaviour of iron and other trace elements during the IronEx-I and PlumEx experiments in the Equatorial Pacific, Deep-Sea Res. II, 45, 995-1041			lat/lon approximate
11	11	1993	-89	0.5	80	0.1	0.1024	PLUMEX		Gordon, R.M., K.S. Johnson, K.H. Coale, 1998, The behaviour of iron and other trace elements during the IronEx-I and PlumEx experiments in the Equatorial Pacific, Deep-Sea Res. II, 45, 995-1041			lat/lon approximate
11	18	1993	-92	0	80	0.13	0.13312	PLUMEX		Gordon, R.M., K.S. Johnson, K.H. Coale, 1998, The behaviour of iron and other trace elements during the IronEx-I and PlumEx experiments in the Equatorial Pacific, Deep-Sea Res. II, 45, 995-1041			lat/lon approximate
11	12	1993	-92	1	80	0.08	0.08192	PLUMEX		Gordon, R.M., K.S. Johnson, K.H. Coale, 1998, The behaviour of iron and other trace elements during the IronEx-I and PlumEx experiments in the Equatorial Pacific, Deep-Sea Res. II, 45, 995-1041			lat/lon approximate
11	15	1993	-93	0.4	80	0.12	0.12288	PLUMEX		Gordon, R.M., K.S. Johnson, K.H. Coale, 1998, The behaviour of iron and other trace elements during the IronEx-I and PlumEx experiments in the Equatorial Pacific, Deep-Sea Res. II, 45, 995-1041			lat/lon approximate
11	14	1993	-93	0.4	80	0.09	0.09216	PLUMEX		Gordon, R.M., K.S. Johnson, K.H. Coale, 1998, The behaviour of iron and other trace elements during the IronEx-I and PlumEx experiments in the Equatorial Pacific, Deep-Sea Res. II, 45, 995-1041			lat/lon approximate
11	15	1993	-93	0.4	100	0.1	0.1024	PLUMEX		Gordon, R.M., K.S. Johnson, K.H. Coale, 1998, The behaviour of iron and other trace elements during the IronEx-I and PlumEx experiments in the Equatorial Pacific, Deep-Sea Res. II, 45, 995-1041			lat/lon approximate
11	14	1993	-93	0.4	100	0.11	0.11264	PLUMEX		Gordon, R.M., K.S. Johnson, K.H. Coale, 1998, The behaviour of iron and other trace elements during the IronEx-I and PlumEx experiments in the Equatorial Pacific, Deep-Sea Res. II, 45, 995-1041			lat/lon approximate
11	12	1993	-92	1	100	0.13	0.13312	PLUMEX		Gordon, R.M., K.S. Johnson, K.H. Coale, 1998, The behaviour of iron and other trace elements during the IronEx-I and PlumEx experiments in the Equatorial Pacific, Deep-Sea Res. II, 45, 995-1041			lat/lon approximate
11	10	1993	-89	-0.5	100	0.15	0.1536	PLUMEX		Gordon, R.M., K.S. Johnson, K.H. Coale, 1998, The behaviour of iron and other trace elements during the IronEx-I and PlumEx experiments in the Equatorial Pacific, Deep-Sea Res. II, 45, 995-1041			lat/lon approximate
11	9	1993	-89	0	100	0.22	0.22528	PLUMEX		Gordon, R.M., K.S. Johnson, K.H. Coale, 1998, The behaviour of iron and other trace elements during the IronEx-I and PlumEx experiments in the Equatorial Pacific, Deep-Sea Res. II, 45, 995-1041			lat/lon approximate
11	18	1993	-92	0	100	0.1	0.1024	PLUMEX		Gordon, R.M., K.S. Johnson, K.H. Coale, 1998, The behaviour of iron and other trace elements during the IronEx-I and PlumEx experiments in the Equatorial Pacific, Deep-Sea Res. II, 45, 995-1041			lat/lon approximate
11	17	1993	-93	0.27	100	0.11	0.11264	PLUMEX		Gordon, R.M., K.S. Johnson, K.H. Coale, 1998, The behaviour of iron and other trace elements during the IronEx-I and PlumEx experiments in the Equatorial Pacific, Deep-Sea Res. II, 45, 995-1041			lat/lon approximate
11	11	1993	-89	0.5	100	0.11	0.11264	PLUMEX		Gordon, R.M., K.S. Johnson, K.H. Coale, 1998, The behaviour of iron and other trace elements during the IronEx-I and PlumEx experiments in the Equatorial Pacific, Deep-Sea Res. II, 45, 995-1041			lat/lon approximate
11	10	1993	-89	-0.5	125	0.16	0.16384	PLUMEX		Gordon, R.M., K.S. Johnson, K.H. Coale, 1998, The behaviour of iron and other trace elements during the IronEx-I and PlumEx experiments in the Equatorial Pacific, Deep-Sea Res. II, 45, 995-1041			lat/lon approximate
11	14	1993	-93	0.4	125	0.18	0.18432	PLUMEX		Gordon, R.M., K.S. Johnson, K.H. Coale, 1998, The behaviour of iron and other trace elements during the IronEx-I and PlumEx experiments in the Equatorial Pacific, Deep-Sea Res. II, 45, 995-1041			lat/lon approximate
11	11	1993	-89	0.5	125	0.13	0.13312	PLUMEX		Gordon, R.M., K.S. Johnson, K.H. Coale, 1998, The behaviour of iron and other trace elements during the IronEx-I and PlumEx experiments in the Equatorial Pacific, Deep-Sea Res. II, 45, 995-1041			lat/lon approximate
11	18	1993	-92	0	125	0.14	0.14336	PLUMEX		Gordon, R.M., K.S. Johnson, K.H. Coale, 1998, The behaviour of iron and other trace elements during the IronEx-I and PlumEx experiments in the Equatorial Pacific, Deep-Sea Res. II, 45, 995-1041			lat/lon approximate
11	15	1993	-93	0.4	125	0.16	0.16384	PLUMEX		Gordon, R.M., K.S. Johnson, K.H. Coale, 1998, The behaviour of iron and other trace elements during the IronEx-I and PlumEx experiments in the Equatorial Pacific, Deep-Sea Res. II, 45, 995-1041			lat/lon approximate
11	9	1993	-89	0	125	0.16	0.16384	PLUMEX		Gordon, R.M., K.S. Johnson, K.H. Coale, 1998, The behaviour of iron and other trace elements during the IronEx-I and PlumEx experiments in the Equatorial Pacific, Deep-Sea Res. II, 45, 995-1041			lat/lon approximate
11	12	1993	-92	1	125	0.18	0.18432	PLUMEX		Gordon, R.M., K.S. Johnson, K.H. Coale, 1998, The behaviour of iron and other trace elements during the IronEx-I and PlumEx experiments in the Equatorial Pacific, Deep-Sea Res. II, 45, 995-1041			lat/lon approximate
11	17	1993	-93	0.27	125	0.12	0.12288	PLUMEX		Gordon, R.M., K.S. Johnson, K.H. Coale, 1998, The behaviour of iron and other trace elements during the IronEx-I and PlumEx experiments in the Equatorial Pacific, Deep-Sea Res. II, 45, 995-1041			lat/lon approximate
11	17	1993	-93	0.27	150	0.22	0.22528	PLUMEX		Gordon, R.M., K.S. Johnson, K.H. Coale, 1998, The behaviour of iron and other trace elements during the IronEx-I and PlumEx experiments in the Equatorial Pacific, Deep-Sea Res. II, 45, 995-1041			lat/lon approximate
11	15	1993	-93	0.4	150	0.17	0.17408	PLUMEX		Gordon, R.M., K.S. Johnson, K.H. Coale, 1998, The behaviour of iron and other trace elements during the IronEx-I and PlumEx experiments in the Equatorial Pacific, Deep-Sea Res. II, 45, 995-1041			lat/lon approximate
11	18	1993	-92	0	150	0.21	0.21504	PLUMEX		Gordon, R.M., K.S. Johnson, K.H. Coale, 1998, The behaviour of iron and other trace elements during the IronEx-I and PlumEx experiments in the Equatorial Pacific, Deep-Sea Res. II, 45, 995-1041			lat/lon approximate
11	10	1993	-89	-0.5	150	0.24	0.24576	PLUMEX		Gordon, R.M., K.S. Johnson, K.H. Coale, 1998, The behaviour of iron and other trace elements during the IronEx-I and PlumEx experiments in the Equatorial Pacific, Deep-Sea Res. II, 45, 995-1041			lat/lon approximate
11	9	1993	-89	0	150	0.2	0.2048	PLUMEX		Gordon, R.M., K.S. Johnson, K.H. Coale, 1998, The behaviour of iron and other trace elements during the IronEx-I and PlumEx experiments in the Equatorial Pacific, Deep-Sea Res. II, 45, 995-1041			lat/lon approximate
11	12	1993	-92	1	150	0.22	0.22528	PLUMEX		Gordon, R.M., K.S. Johnson, K.H. Coale, 1998, The behaviour of iron and other trace elements during the IronEx-I and PlumEx experiments in the Equatorial Pacific, Deep-Sea Res. II, 45, 995-1041			lat/lon approximate
11	11	1993	-89	0.5	150	0.18	0.18432	PLUMEX		Gordon, R.M., K.S. Johnson, K.H. Coale, 1998, The behaviour of iron and other trace elements during the IronEx-I and PlumEx experiments in the Equatorial Pacific, Deep-Sea Res. II, 45, 995-1041			lat/lon approximate
12	20	1997	164.11	-74.53	2	0	3.5	RossSea		Grotti, M., F. Soggia, M. Abelmoschi, P. Rivoar, E. Magi and R. Frache, 2001. Temporal distribution of trace metals in Antarctic coastal waters, Mar. Chem., 76, 189-209
12	13	1997	164.11	-74.53	2	0	3.9	RossSea		Grotti, M., F. Soggia, M. Abelmoschi, P. Rivoar, E. Magi and R. Frache, 2001. Temporal distribution of trace metals in Antarctic coastal waters, Mar. Chem., 76, 189-209			COASTAL
1	20	1998	164.11	-74.53	2	0	0.8	RossSea		Grotti, M., F. Soggia, M. Abelmoschi, P. Rivoar, E. Magi and R. Frache, 2001. Temporal distribution of trace metals in Antarctic coastal waters, Mar. Chem., 76, 189-209
11	29	1997	164.11	-74.53	2	0	1	RossSea		Grotti, M., F. Soggia, M. Abelmoschi, P. Rivoar, E. Magi and R. Frache, 2001. Temporal distribution of trace metals in Antarctic coastal waters, Mar. Chem., 76, 189-209			COASTAL
1	16	1998	164.11	-74.53	2	0	2.8	RossSea		Grotti, M., F. Soggia, M. Abelmoschi, P. Rivoar, E. Magi and R. Frache, 2001. Temporal distribution of trace metals in Antarctic coastal waters, Mar. Chem., 76, 189-209
11	13	1997	164.11	-74.53	2	0	1.8	RossSea		Grotti, M., F. Soggia, M. Abelmoschi, P. Rivoar, E. Magi and R. Frache, 2001. Temporal distribution of trace metals in Antarctic coastal waters, Mar. Chem., 76, 189-209			COASTAL
1	13	1998	164.11	-74.53	2	0	0.6	RossSea		Grotti, M., F. Soggia, M. Abelmoschi, P. Rivoar, E. Magi and R. Frache, 2001. Temporal distribution of trace metals in Antarctic coastal waters, Mar. Chem., 76, 189-209
12	9	1997	164.11	-74.53	2	0	1	RossSea		Grotti, M., F. Soggia, M. Abelmoschi, P. Rivoar, E. Magi and R. Frache, 2001. Temporal distribution of trace metals in Antarctic coastal waters, Mar. Chem., 76, 189-209			COASTAL
1	7	1998	164.11	-74.53	2	0	1	RossSea		Grotti, M., F. Soggia, M. Abelmoschi, P. Rivoar, E. Magi and R. Frache, 2001. Temporal distribution of trace metals in Antarctic coastal waters, Mar. Chem., 76, 189-209
1	30	1998	164.11	-74.53	4	0	0.7	RossSea		Grotti, M., F. Soggia, M. Abelmoschi, P. Rivoar, E. Magi and R. Frache, 2001. Temporal distribution of trace metals in Antarctic coastal waters, Mar. Chem., 76, 189-209
2	21	1998	164.11	-74.53	4	0	4.1	RossSea		Grotti, M., F. Soggia, M. Abelmoschi, P. Rivoar, E. Magi and R. Frache, 2001. Temporal distribution of trace metals in Antarctic coastal waters, Mar. Chem., 76, 189-209
2	11	1998	164.11	-74.53	4	0	1.3	RossSea		Grotti, M., F. Soggia, M. Abelmoschi, P. Rivoar, E. Magi and R. Frache, 2001. Temporal distribution of trace metals in Antarctic coastal waters, Mar. Chem., 76, 189-209
2	7	1998	164.11	-74.53	4	0	1.6	RossSea		Grotti, M., F. Soggia, M. Abelmoschi, P. Rivoar, E. Magi and R. Frache, 2001. Temporal distribution of trace metals in Antarctic coastal waters, Mar. Chem., 76, 189-209
11	24	1997	164.11	-74.53	4		1.5	RossSea		Grotti, M., F. Soggia, M. Abelmoschi, P. Rivoar, E. Magi and R. Frache, 2001. Temporal distribution of trace metals in Antarctic coastal waters, Mar. Chem., 76, 189-209			COASTAL
12	13	1997	164.11	-74.53	10	0	1.3	RossSea		Grotti, M., F. Soggia, M. Abelmoschi, P. Rivoar, E. Magi and R. Frache, 2001. Temporal distribution of trace metals in Antarctic coastal waters, Mar. Chem., 76, 189-209
12	20	1997	164.11	-74.53	10	0	2.4	RossSea		Grotti, M., F. Soggia, M. Abelmoschi, P. Rivoar, E. Magi and R. Frache, 2001. Temporal distribution of trace metals in Antarctic coastal waters, Mar. Chem., 76, 189-209
1	20	1998	164.11	-74.53	13	0	0.6	RossSea		Grotti, M., F. Soggia, M. Abelmoschi, P. Rivoar, E. Magi and R. Frache, 2001. Temporal distribution of trace metals in Antarctic coastal waters, Mar. Chem., 76, 189-209
1	30	1998	164.11	-74.53	14	0	0.7	RossSea		Grotti, M., F. Soggia, M. Abelmoschi, P. Rivoar, E. Magi and R. Frache, 2001. Temporal distribution of trace metals in Antarctic coastal waters, Mar. Chem., 76, 189-209
12	9	1997	164.11	-74.53	18	0	0.4	RossSea		Grotti, M., F. Soggia, M. Abelmoschi, P. Rivoar, E. Magi and R. Frache, 2001. Temporal distribution of trace metals in Antarctic coastal waters, Mar. Chem., 76, 189-209			COASTAL
1	16	1998	164.11	-74.53	20	0	0.6	RossSea		Grotti, M., F. Soggia, M. Abelmoschi, P. Rivoar, E. Magi and R. Frache, 2001. Temporal distribution of trace metals in Antarctic coastal waters, Mar. Chem., 76, 189-209
11	13	1997	164.11	-74.53	25	0	1.6	RossSea		Grotti, M., F. Soggia, M. Abelmoschi, P. Rivoar, E. Magi and R. Frache, 2001. Temporal distribution of trace metals in Antarctic coastal waters, Mar. Chem., 76, 189-209			COASTAL
2	21	1998	164.11	-74.53	25	0	1.6	RossSea		Grotti, M., F. Soggia, M. Abelmoschi, P. Rivoar, E. Magi and R. Frache, 2001. Temporal distribution of trace metals in Antarctic coastal waters, Mar. Chem., 76, 189-209
2	7	1998	164.11	-74.53	25	0	1.5	RossSea		Grotti, M., F. Soggia, M. Abelmoschi, P. Rivoar, E. Magi and R. Frache, 2001. Temporal distribution of trace metals in Antarctic coastal waters, Mar. Chem., 76, 189-209
2	11	1998	164.11	-74.53	25	0	1.1	RossSea		Grotti, M., F. Soggia, M. Abelmoschi, P. Rivoar, E. Magi and R. Frache, 2001. Temporal distribution of trace metals in Antarctic coastal waters, Mar. Chem., 76, 189-209
1	7	1998	164.11	-74.53	30	0	0.6	RossSea		Grotti, M., F. Soggia, M. Abelmoschi, P. Rivoar, E. Magi and R. Frache, 2001. Temporal distribution of trace metals in Antarctic coastal waters, Mar. Chem., 76, 189-209
11	24	1997	164.11	-74.53	50	0	1.3	RossSea		Grotti, M., F. Soggia, M. Abelmoschi, P. Rivoar, E. Magi and R. Frache, 2001. Temporal distribution of trace metals in Antarctic coastal waters, Mar. Chem., 76, 189-209			COASTAL
12	9	1997	164.11	-74.53	50	0	2.7	RossSea		Grotti, M., F. Soggia, M. Abelmoschi, P. Rivoar, E. Magi and R. Frache, 2001. Temporal distribution of trace metals in Antarctic coastal waters, Mar. Chem., 76, 189-209			COASTAL
1	13	1998	164.11	-74.53	50	0	2.1	RossSea		Grotti, M., F. Soggia, M. Abelmoschi, P. Rivoar, E. Magi and R. Frache, 2001. Temporal distribution of trace metals in Antarctic coastal waters, Mar. Chem., 76, 189-209
12	13	1997	164.11	-74.53	50	0	0.9	RossSea		Grotti, M., F. Soggia, M. Abelmoschi, P. Rivoar, E. Magi and R. Frache, 2001. Temporal distribution of trace metals in Antarctic coastal waters, Mar. Chem., 76, 189-209
12	20	1997	164.11	-74.53	50	0	0.9	RossSea		Grotti, M., F. Soggia, M. Abelmoschi, P. Rivoar, E. Magi and R. Frache, 2001. Temporal distribution of trace metals in Antarctic coastal waters, Mar. Chem., 76, 189-209
11	29	1997	164.11	-74.53	55	0	1	RossSea		Grotti, M., F. Soggia, M. Abelmoschi, P. Rivoar, E. Magi and R. Frache, 2001. Temporal distribution of trace metals in Antarctic coastal waters, Mar. Chem., 76, 189-209			COASTAL
2	7	1998	164.11	-74.53	100	0	1.4	RossSea		Grotti, M., F. Soggia, M. Abelmoschi, P. Rivoar, E. Magi and R. Frache, 2001. Temporal distribution of trace metals in Antarctic coastal waters, Mar. Chem., 76, 189-209
11	24	1997	164.11	-74.53	100	0	1.1	RossSea		Grotti, M., F. Soggia, M. Abelmoschi, P. Rivoar, E. Magi and R. Frache, 2001. Temporal distribution of trace metals in Antarctic coastal waters, Mar. Chem., 76, 189-209			COASTAL
2	21	1998	164.11	-74.53	100	0	3.3	RossSea		Grotti, M., F. Soggia, M. Abelmoschi, P. Rivoar, E. Magi and R. Frache, 2001. Temporal distribution of trace metals in Antarctic coastal waters, Mar. Chem., 76, 189-209
11	13	1997	164.11	-74.53	100	0	1.4	RossSea		Grotti, M., F. Soggia, M. Abelmoschi, P. Rivoar, E. Magi and R. Frache, 2001. Temporal distribution of trace metals in Antarctic coastal waters, Mar. Chem., 76, 189-209			COASTAL
2	11	1998	164.11	-74.53	100	0	1.2	RossSea		Grotti, M., F. Soggia, M. Abelmoschi, P. Rivoar, E. Magi and R. Frache, 2001. Temporal distribution of trace metals in Antarctic coastal waters, Mar. Chem., 76, 189-209
1	20	1998	164.11	-74.53	100	0	0.5	RossSea		Grotti, M., F. Soggia, M. Abelmoschi, P. Rivoar, E. Magi and R. Frache, 2001. Temporal distribution of trace metals in Antarctic coastal waters, Mar. Chem., 76, 189-209
11	29	1997	164.11	-74.53	100	0	2.3	RossSea		Grotti, M., F. Soggia, M. Abelmoschi, P. Rivoar, E. Magi and R. Frache, 2001. Temporal distribution of trace metals in Antarctic coastal waters, Mar. Chem., 76, 189-209			COASTAL
1	7	1998	164.11	-74.53	110	0	0.8	RossSea		Grotti, M., F. Soggia, M. Abelmoschi, P. Rivoar, E. Magi and R. Frache, 2001. Temporal distribution of trace metals in Antarctic coastal waters, Mar. Chem., 76, 189-209
1	16	1998	164.11	-74.53	120	0	1	RossSea		Grotti, M., F. Soggia, M. Abelmoschi, P. Rivoar, E. Magi and R. Frache, 2001. Temporal distribution of trace metals in Antarctic coastal waters, Mar. Chem., 76, 189-209
1	30	1998	164.11	-74.53	120	0	0.5	RossSea		Grotti, M., F. Soggia, M. Abelmoschi, P. Rivoar, E. Magi and R. Frache, 2001. Temporal distribution of trace metals in Antarctic coastal waters, Mar. Chem., 76, 189-209
1	13	1998	164.11	-74.53	150	0	1.1	RossSea		Grotti, M., F. Soggia, M. Abelmoschi, P. Rivoar, E. Magi and R. Frache, 2001. Temporal distribution of trace metals in Antarctic coastal waters, Mar. Chem., 76, 189-209
1	16	1998	164.11	-74.53	350	0	1.1	RossSea		Grotti, M., F. Soggia, M. Abelmoschi, P. Rivoar, E. Magi and R. Frache, 2001. Temporal distribution of trace metals in Antarctic coastal waters, Mar. Chem., 76, 189-209
1	30	1998	164.11	-74.53	350	0	0.4	RossSea		Grotti, M., F. Soggia, M. Abelmoschi, P. Rivoar, E. Magi and R. Frache, 2001. Temporal distribution of trace metals in Antarctic coastal waters, Mar. Chem., 76, 189-209
1	13	1998	164.11	-74.53	350	0	1.9	RossSea		Grotti, M., F. Soggia, M. Abelmoschi, P. Rivoar, E. Magi and R. Frache, 2001. Temporal distribution of trace metals in Antarctic coastal waters, Mar. Chem., 76, 189-209
1	20	1998	164.11	-74.53	350	0	1.2	RossSea		Grotti, M., F. Soggia, M. Abelmoschi, P. Rivoar, E. Magi and R. Frache, 2001. Temporal distribution of trace metals in Antarctic coastal waters, Mar. Chem., 76, 189-209
1	7	1998	164.11	-74.53	380	0	0.6	RossSea		Grotti, M., F. Soggia, M. Abelmoschi, P. Rivoar, E. Magi and R. Frache, 2001. Temporal distribution of trace metals in Antarctic coastal waters, Mar. Chem., 76, 189-209
12	9	1997	164.11	-74.53	380	0	0.5	RossSea		Grotti, M., F. Soggia, M. Abelmoschi, P. Rivoar, E. Magi and R. Frache, 2001. Temporal distribution of trace metals in Antarctic coastal waters, Mar. Chem., 76, 189-209			COASTAL
2	11	1998	164.11	-74.53	380	0	1	RossSea		Grotti, M., F. Soggia, M. Abelmoschi, P. Rivoar, E. Magi and R. Frache, 2001. Temporal distribution of trace metals in Antarctic coastal waters, Mar. Chem., 76, 189-209
12	13	1997	164.11	-74.53	380	0	2.4	RossSea		Grotti, M., F. Soggia, M. Abelmoschi, P. Rivoar, E. Magi and R. Frache, 2001. Temporal distribution of trace metals in Antarctic coastal waters, Mar. Chem., 76, 189-209
2	21	1998	164.11	-74.53	380	0	1.8	RossSea		Grotti, M., F. Soggia, M. Abelmoschi, P. Rivoar, E. Magi and R. Frache, 2001. Temporal distribution of trace metals in Antarctic coastal waters, Mar. Chem., 76, 189-209
11	29	1997	164.11	-74.53	380	0	1.6	RossSea		Grotti, M., F. Soggia, M. Abelmoschi, P. Rivoar, E. Magi and R. Frache, 2001. Temporal distribution of trace metals in Antarctic coastal waters, Mar. Chem., 76, 189-209			COASTAL
2	7	1998	164.11	-74.53	380	0	1.2	RossSea		Grotti, M., F. Soggia, M. Abelmoschi, P. Rivoar, E. Magi and R. Frache, 2001. Temporal distribution of trace metals in Antarctic coastal waters, Mar. Chem., 76, 189-209
12	20	1997	164.11	-74.53	380	0	0.8	RossSea		Grotti, M., F. Soggia, M. Abelmoschi, P. Rivoar, E. Magi and R. Frache, 2001. Temporal distribution of trace metals in Antarctic coastal waters, Mar. Chem., 76, 189-209
11	24	1997	164.11	-74.53	389	0	1.2	RossSea		Grotti, M., F. Soggia, M. Abelmoschi, P. Rivoar, E. Magi and R. Frache, 2001. Temporal distribution of trace metals in Antarctic coastal waters, Mar. Chem., 76, 189-209			COASTAL
2	9	1999	140	-61	10	0	0.08	SOIREE		Hall, J.A. and K. Safi, 2001. The impact of in situ Fe fertilisation on the microbial food web in the Southern Ocean. Deep-Sea Res. II 48: 2591-2613.		Depth is approximate, MLD=65 m
6	8	1984	-133.79	34.93	0.5	0.06	0.06144	VtexV		Johnson - MLML World Iron Data Set: Appendix A to Johnson, K. S., Gordon, R. M. and Coale, K. H., 1997, What controls dissolved iron concentrations in the world ocean? Mar. Chem. 57: 137-161.
1	25	1990	-174	-72.5	20	0.1	0.1024	RossSea		Johnson - MLML World Iron Data Set: Appendix A to Johnson, K. S., Gordon, R. M. and Coale, K. H., 1997, What controls dissolved iron concentrations in the world ocean? Mar. Chem. 57: 137-161.
9	9	1986	-146.75	31.62	20	0.06	0.06144	VtexVI		Johnson - MLML World Iron Data Set: Appendix A to Johnson, K. S., Gordon, R. M. and Coale, K. H., 1997, What controls dissolved iron concentrations in the world ocean? Mar. Chem. 57: 137-161.
1	16	1990	-175	-76.5	20	0.08	0.08192	RossSea		Johnson - MLML World Iron Data Set: Appendix A to Johnson, K. S., Gordon, R. M. and Coale, K. H., 1997, What controls dissolved iron concentrations in the world ocean? Mar. Chem. 57: 137-161.
9	15	1986	-139	33.05	20	0.06	0.06144	VtexVI		Johnson - MLML World Iron Data Set: Appendix A to Johnson, K. S., Gordon, R. M. and Coale, K. H., 1997, What controls dissolved iron concentrations in the world ocean? Mar. Chem. 57: 137-161.
9	18	1986	-140.77	39.77	20	0.1	0.1024	VtexVI		Johnson - MLML World Iron Data Set: Appendix A to Johnson, K. S., Gordon, R. M. and Coale, K. H., 1997, What controls dissolved iron concentrations in the world ocean? Mar. Chem. 57: 137-161.
9	3	1986	-129.78	34.9	20	0.2	0.2048	VtexVI		Johnson - MLML World Iron Data Set: Appendix A to Johnson, K. S., Gordon, R. M. and Coale, K. H., 1997, What controls dissolved iron concentrations in the world ocean? Mar. Chem. 57: 137-161.
9	12	1986	-137.42	26.43	25	0.1	0.1024	VtexVI		Johnson - MLML World Iron Data Set: Appendix A to Johnson, K. S., Gordon, R. M. and Coale, K. H., 1997, What controls dissolved iron concentrations in the world ocean? Mar. Chem. 57: 137-161.
9	3	1986	-129.78	34.9	50	0.09	0.09216	VtexVI		Johnson - MLML World Iron Data Set: Appendix A to Johnson, K. S., Gordon, R. M. and Coale, K. H., 1997, What controls dissolved iron concentrations in the world ocean? Mar. Chem. 57: 137-161.
9	9	1986	-146.75	31.62	50	0.02	0.02048	VtexVI		Johnson - MLML World Iron Data Set: Appendix A to Johnson, K. S., Gordon, R. M. and Coale, K. H., 1997, What controls dissolved iron concentrations in the world ocean? Mar. Chem. 57: 137-161.
6	8	1984	-133.79	34.93	50	0.16	0.16384	VtexV		Johnson - MLML World Iron Data Set: Appendix A to Johnson, K. S., Gordon, R. M. and Coale, K. H., 1997, What controls dissolved iron concentrations in the world ocean? Mar. Chem. 57: 137-161.
9	15	1986	-139	33.05	50	0.07	0.07168	VtexVI		Johnson - MLML World Iron Data Set: Appendix A to Johnson, K. S., Gordon, R. M. and Coale, K. H., 1997, What controls dissolved iron concentrations in the world ocean? Mar. Chem. 57: 137-161.
9	12	1986	-137.42	26.43	50	0.06	0.06144	VtexVI		Johnson - MLML World Iron Data Set: Appendix A to Johnson, K. S., Gordon, R. M. and Coale, K. H., 1997, What controls dissolved iron concentrations in the world ocean? Mar. Chem. 57: 137-161.
9	18	1986	-140.77	39.77	55	0.04	0.04096	VtexVI		Johnson - MLML World Iron Data Set: Appendix A to Johnson, K. S., Gordon, R. M. and Coale, K. H., 1997, What controls dissolved iron concentrations in the world ocean? Mar. Chem. 57: 137-161.
1	25	1990	-174	-72.5	60	0.14	0.14336	RossSea		Johnson - MLML World Iron Data Set: Appendix A to Johnson, K. S., Gordon, R. M. and Coale, K. H., 1997, What controls dissolved iron concentrations in the world ocean? Mar. Chem. 57: 137-161.
1	16	1990	-175	-76.5	60	0.06	0.06144	RossSea		Johnson - MLML World Iron Data Set: Appendix A to Johnson, K. S., Gordon, R. M. and Coale, K. H., 1997, What controls dissolved iron concentrations in the world ocean? Mar. Chem. 57: 137-161.
9	12	1986	-137.42	26.43	90	0.04	0.04096	VtexVI		Johnson - MLML World Iron Data Set: Appendix A to Johnson, K. S., Gordon, R. M. and Coale, K. H., 1997, What controls dissolved iron concentrations in the world ocean? Mar. Chem. 57: 137-161.
1	25	1990	-174	-72.5	100	0.09	0.09216	RossSea		Johnson - MLML World Iron Data Set: Appendix A to Johnson, K. S., Gordon, R. M. and Coale, K. H., 1997, What controls dissolved iron concentrations in the world ocean? Mar. Chem. 57: 137-161.
1	16	1990	-175	-76.5	100	0.09	0.09216	RossSea		Johnson - MLML World Iron Data Set: Appendix A to Johnson, K. S., Gordon, R. M. and Coale, K. H., 1997, What controls dissolved iron concentrations in the world ocean? Mar. Chem. 57: 137-161.
6	8	1984	-133.79	34.93	100	0.15	0.1536	VtexV		Johnson - MLML World Iron Data Set: Appendix A to Johnson, K. S., Gordon, R. M. and Coale, K. H., 1997, What controls dissolved iron concentrations in the world ocean? Mar. Chem. 57: 137-161.
9	9	1986	-146.75	31.62	100	0.06	0.06144	VtexVI		Johnson - MLML World Iron Data Set: Appendix A to Johnson, K. S., Gordon, R. M. and Coale, K. H., 1997, What controls dissolved iron concentrations in the world ocean? Mar. Chem. 57: 137-161.
9	3	1986	-129.78	34.9	100	0.15	0.1536	VtexVI		Johnson - MLML World Iron Data Set: Appendix A to Johnson, K. S., Gordon, R. M. and Coale, K. H., 1997, What controls dissolved iron concentrations in the world ocean? Mar. Chem. 57: 137-161.
9	15	1986	-139	33.05	105	0.06	0.06144	VtexVI		Johnson - MLML World Iron Data Set: Appendix A to Johnson, K. S., Gordon, R. M. and Coale, K. H., 1997, What controls dissolved iron concentrations in the world ocean? Mar. Chem. 57: 137-161.
9	18	1986	-140.77	39.77	105	0.1	0.1024	VtexVI		Johnson - MLML World Iron Data Set: Appendix A to Johnson, K. S., Gordon, R. M. and Coale, K. H., 1997, What controls dissolved iron concentrations in the world ocean? Mar. Chem. 57: 137-161.
9	3	1986	-129.78	34.9	150	0.06	0.06144	VtexVI		Johnson - MLML World Iron Data Set: Appendix A to Johnson, K. S., Gordon, R. M. and Coale, K. H., 1997, What controls dissolved iron concentrations in the world ocean? Mar. Chem. 57: 137-161.
1	16	1990	-175	-76.5	150	0.12	0.12288	RossSea		Johnson - MLML World Iron Data Set: Appendix A to Johnson, K. S., Gordon, R. M. and Coale, K. H., 1997, What controls dissolved iron concentrations in the world ocean? Mar. Chem. 57: 137-161.
9	9	1986	-146.75	31.62	150	0.22	0.22528	VtexVI		Johnson - MLML World Iron Data Set: Appendix A to Johnson, K. S., Gordon, R. M. and Coale, K. H., 1997, What controls dissolved iron concentrations in the world ocean? Mar. Chem. 57: 137-161.
9	15	1986	-139	33.05	150	0.06	0.06144	VtexVI		Johnson - MLML World Iron Data Set: Appendix A to Johnson, K. S., Gordon, R. M. and Coale, K. H., 1997, What controls dissolved iron concentrations in the world ocean? Mar. Chem. 57: 137-161.
9	12	1986	-137.42	26.43	150	0.04	0.04096	VtexVI		Johnson - MLML World Iron Data Set: Appendix A to Johnson, K. S., Gordon, R. M. and Coale, K. H., 1997, What controls dissolved iron concentrations in the world ocean? Mar. Chem. 57: 137-161.
9	18	1986	-140.77	39.77	160	0.08	0.08192	VtexVI		Johnson - MLML World Iron Data Set: Appendix A to Johnson, K. S., Gordon, R. M. and Coale, K. H., 1997, What controls dissolved iron concentrations in the world ocean? Mar. Chem. 57: 137-161.
1	25	1990	-174	-72.5	175	0.23	0.23552	RossSea		Johnson - MLML World Iron Data Set: Appendix A to Johnson, K. S., Gordon, R. M. and Coale, K. H., 1997, What controls dissolved iron concentrations in the world ocean? Mar. Chem. 57: 137-161.
9	3	1986	-129.78	34.9	195	0.24	0.24576	VtexVI		Johnson - MLML World Iron Data Set: Appendix A to Johnson, K. S., Gordon, R. M. and Coale, K. H., 1997, What controls dissolved iron concentrations in the world ocean? Mar. Chem. 57: 137-161.
9	12	1986	-137.42	26.43	195	0.23	0.23552	VtexVI		Johnson - MLML World Iron Data Set: Appendix A to Johnson, K. S., Gordon, R. M. and Coale, K. H., 1997, What controls dissolved iron concentrations in the world ocean? Mar. Chem. 57: 137-161.
9	15	1986	-139	33.05	200	0.33	0.33792	VtexVI		Johnson - MLML World Iron Data Set: Appendix A to Johnson, K. S., Gordon, R. M. and Coale, K. H., 1997, What controls dissolved iron concentrations in the world ocean? Mar. Chem. 57: 137-161.
9	18	1986	-140.77	39.77	210	0.14	0.14336	VtexVI		Johnson - MLML World Iron Data Set: Appendix A to Johnson, K. S., Gordon, R. M. and Coale, K. H., 1997, What controls dissolved iron concentrations in the world ocean? Mar. Chem. 57: 137-161.
9	9	1986	-146.75	31.62	220	0.16	0.16384	VtexVI		Johnson - MLML World Iron Data Set: Appendix A to Johnson, K. S., Gordon, R. M. and Coale, K. H., 1997, What controls dissolved iron concentrations in the world ocean? Mar. Chem. 57: 137-161.
1	16	1990	-175	-76.5	250	0.23	0.23552	RossSea		Johnson - MLML World Iron Data Set: Appendix A to Johnson, K. S., Gordon, R. M. and Coale, K. H., 1997, What controls dissolved iron concentrations in the world ocean? Mar. Chem. 57: 137-161.
9	15	1986	-139	33.05	250	0.29	0.29696	VtexVI		Johnson - MLML World Iron Data Set: Appendix A to Johnson, K. S., Gordon, R. M. and Coale, K. H., 1997, What controls dissolved iron concentrations in the world ocean? Mar. Chem. 57: 137-161.
1	25	1990	-174	-72.5	275	0.17	0.17408	RossSea		Johnson - MLML World Iron Data Set: Appendix A to Johnson, K. S., Gordon, R. M. and Coale, K. H., 1997, What controls dissolved iron concentrations in the world ocean? Mar. Chem. 57: 137-161.
9	12	1986	-137.42	26.43	290	0.32	0.32768	VtexVI		Johnson - MLML World Iron Data Set: Appendix A to Johnson, K. S., Gordon, R. M. and Coale, K. H., 1997, What controls dissolved iron concentrations in the world ocean? Mar. Chem. 57: 137-161.
6	8	1984	-133.79	34.93	290	0.48	0.49152	VtexV		Johnson - MLML World Iron Data Set: Appendix A to Johnson, K. S., Gordon, R. M. and Coale, K. H., 1997, What controls dissolved iron concentrations in the world ocean? Mar. Chem. 57: 137-161.
9	3	1986	-129.78	34.9	295	0.32	0.32768	VtexVI		Johnson - MLML World Iron Data Set: Appendix A to Johnson, K. S., Gordon, R. M. and Coale, K. H., 1997, What controls dissolved iron concentrations in the world ocean? Mar. Chem. 57: 137-161.
9	18	1986	-140.77	39.77	300	0.31	0.31744	VtexVI		Johnson - MLML World Iron Data Set: Appendix A to Johnson, K. S., Gordon, R. M. and Coale, K. H., 1997, What controls dissolved iron concentrations in the world ocean? Mar. Chem. 57: 137-161.
9	15	1986	-139	33.05	300	0.51	0.52224	VtexVI		Johnson - MLML World Iron Data Set: Appendix A to Johnson, K. S., Gordon, R. M. and Coale, K. H., 1997, What controls dissolved iron concentrations in the world ocean? Mar. Chem. 57: 137-161.
9	9	1986	-146.75	31.62	320	0.14	0.14336	VtexVI		Johnson - MLML World Iron Data Set: Appendix A to Johnson, K. S., Gordon, R. M. and Coale, K. H., 1997, What controls dissolved iron concentrations in the world ocean? Mar. Chem. 57: 137-161.
1	25	1990	-174	-72.5	375	0.23	0.23552	RossSea		Johnson - MLML World Iron Data Set: Appendix A to Johnson, K. S., Gordon, R. M. and Coale, K. H., 1997, What controls dissolved iron concentrations in the world ocean? Mar. Chem. 57: 137-161.
9	12	1986	-137.42	26.43	390	0.48	0.49152	VtexVI		Johnson - MLML World Iron Data Set: Appendix A to Johnson, K. S., Gordon, R. M. and Coale, K. H., 1997, What controls dissolved iron concentrations in the world ocean? Mar. Chem. 57: 137-161.
9	3	1986	-129.78	34.9	390	0.39	0.39936	VtexVI		Johnson - MLML World Iron Data Set: Appendix A to Johnson, K. S., Gordon, R. M. and Coale, K. H., 1997, What controls dissolved iron concentrations in the world ocean? Mar. Chem. 57: 137-161.
9	18	1986	-140.77	39.77	395	0.34	0.34816	VtexVI		Johnson - MLML World Iron Data Set: Appendix A to Johnson, K. S., Gordon, R. M. and Coale, K. H., 1997, What controls dissolved iron concentrations in the world ocean? Mar. Chem. 57: 137-161.
9	15	1986	-139	33.05	400	0.39	0.39936	VtexVI		Johnson - MLML World Iron Data Set: Appendix A to Johnson, K. S., Gordon, R. M. and Coale, K. H., 1997, What controls dissolved iron concentrations in the world ocean? Mar. Chem. 57: 137-161.
9	9	1986	-146.75	31.62	420	0.24	0.24576	VtexVI		Johnson - MLML World Iron Data Set: Appendix A to Johnson, K. S., Gordon, R. M. and Coale, K. H., 1997, What controls dissolved iron concentrations in the world ocean? Mar. Chem. 57: 137-161.
9	9	1986	-146.75	31.62	475	0.37	0.37888	VtexVI		Johnson - MLML World Iron Data Set: Appendix A to Johnson, K. S., Gordon, R. M. and Coale, K. H., 1997, What controls dissolved iron concentrations in the world ocean? Mar. Chem. 57: 137-161.
9	3	1986	-129.78	34.9	485	0.61	0.62464	VtexVI		Johnson - MLML World Iron Data Set: Appendix A to Johnson, K. S., Gordon, R. M. and Coale, K. H., 1997, What controls dissolved iron concentrations in the world ocean? Mar. Chem. 57: 137-161.
9	12	1986	-137.42	26.43	490	0.4	0.4096	VtexVI		Johnson - MLML World Iron Data Set: Appendix A to Johnson, K. S., Gordon, R. M. and Coale, K. H., 1997, What controls dissolved iron concentrations in the world ocean? Mar. Chem. 57: 137-161.
9	15	1986	-139	33.05	500	0.54	0.55296	VtexVI		Johnson - MLML World Iron Data Set: Appendix A to Johnson, K. S., Gordon, R. M. and Coale, K. H., 1997, What controls dissolved iron concentrations in the world ocean? Mar. Chem. 57: 137-161.
9	18	1986	-140.77	39.77	510	0.27	0.27648	VtexVI		Johnson - MLML World Iron Data Set: Appendix A to Johnson, K. S., Gordon, R. M. and Coale, K. H., 1997, What controls dissolved iron concentrations in the world ocean? Mar. Chem. 57: 137-161.
9	3	1986	-129.78	34.9	580	1.02	1.04448	VtexVI		Johnson - MLML World Iron Data Set: Appendix A to Johnson, K. S., Gordon, R. M. and Coale, K. H., 1997, What controls dissolved iron concentrations in the world ocean? Mar. Chem. 57: 137-161.
9	12	1986	-137.42	26.43	590	0.63	0.64512	VtexVI		Johnson - MLML World Iron Data Set: Appendix A to Johnson, K. S., Gordon, R. M. and Coale, K. H., 1997, What controls dissolved iron concentrations in the world ocean? Mar. Chem. 57: 137-161.
9	15	1986	-139	33.05	590	0.57	0.58368	VtexVI		Johnson - MLML World Iron Data Set: Appendix A to Johnson, K. S., Gordon, R. M. and Coale, K. H., 1997, What controls dissolved iron concentrations in the world ocean? Mar. Chem. 57: 137-161.
9	18	1986	-140.77	39.77	605	0.45	0.4608	VtexVI		Johnson - MLML World Iron Data Set: Appendix A to Johnson, K. S., Gordon, R. M. and Coale, K. H., 1997, What controls dissolved iron concentrations in the world ocean? Mar. Chem. 57: 137-161.
9	9	1986	-146.75	31.62	665	0.48	0.49152	VtexVI		Johnson - MLML World Iron Data Set: Appendix A to Johnson, K. S., Gordon, R. M. and Coale, K. H., 1997, What controls dissolved iron concentrations in the world ocean? Mar. Chem. 57: 137-161.
9	3	1986	-129.78	34.9	675	1.23	1.25952	VtexVI		Johnson - MLML World Iron Data Set: Appendix A to Johnson, K. S., Gordon, R. M. and Coale, K. H., 1997, What controls dissolved iron concentrations in the world ocean? Mar. Chem. 57: 137-161.
6	8	1984	-133.79	34.93	680	0.72	0.73728	VtexV		Johnson - MLML World Iron Data Set: Appendix A to Johnson, K. S., Gordon, R. M. and Coale, K. H., 1997, What controls dissolved iron concentrations in the world ocean? Mar. Chem. 57: 137-161.
9	12	1986	-137.42	26.43	690	0.7	0.7168	VtexVI		Johnson - MLML World Iron Data Set: Appendix A to Johnson, K. S., Gordon, R. M. and Coale, K. H., 1997, What controls dissolved iron concentrations in the world ocean? Mar. Chem. 57: 137-161.
9	15	1986	-139	33.05	700	0.79	0.80896	VtexVI		Johnson - MLML World Iron Data Set: Appendix A to Johnson, K. S., Gordon, R. M. and Coale, K. H., 1997, What controls dissolved iron concentrations in the world ocean? Mar. Chem. 57: 137-161.
9	18	1986	-140.77	39.77	705	0.52	0.53248	VtexVI		Johnson - MLML World Iron Data Set: Appendix A to Johnson, K. S., Gordon, R. M. and Coale, K. H., 1997, What controls dissolved iron concentrations in the world ocean? Mar. Chem. 57: 137-161.
9	9	1986	-146.75	31.62	760	0.61	0.62464	VtexVI		Johnson - MLML World Iron Data Set: Appendix A to Johnson, K. S., Gordon, R. M. and Coale, K. H., 1997, What controls dissolved iron concentrations in the world ocean? Mar. Chem. 57: 137-161.
9	3	1986	-129.78	34.9	775	1.08	1.10592	VtexVI		Johnson - MLML World Iron Data Set: Appendix A to Johnson, K. S., Gordon, R. M. and Coale, K. H., 1997, What controls dissolved iron concentrations in the world ocean? Mar. Chem. 57: 137-161.
9	18	1986	-140.77	39.77	775	0.57	0.58368	VtexVI		Johnson - MLML World Iron Data Set: Appendix A to Johnson, K. S., Gordon, R. M. and Coale, K. H., 1997, What controls dissolved iron concentrations in the world ocean? Mar. Chem. 57: 137-161.
9	12	1986	-137.42	26.43	790	0.63	0.64512	VtexVI		Johnson - MLML World Iron Data Set: Appendix A to Johnson, K. S., Gordon, R. M. and Coale, K. H., 1997, What controls dissolved iron concentrations in the world ocean? Mar. Chem. 57: 137-161.
9	18	1986	-140.77	39.77	870	0.59	0.60416	VtexVI		Johnson - MLML World Iron Data Set: Appendix A to Johnson, K. S., Gordon, R. M. and Coale, K. H., 1997, What controls dissolved iron concentrations in the world ocean? Mar. Chem. 57: 137-161.
6	8	1984	-133.79	34.93	885	0.93	0.95232	VtexV		Johnson - MLML World Iron Data Set: Appendix A to Johnson, K. S., Gordon, R. M. and Coale, K. H., 1997, What controls dissolved iron concentrations in the world ocean? Mar. Chem. 57: 137-161.
9	3	1986	-129.78	34.9	895	1.06	1.08544	VtexVI		Johnson - MLML World Iron Data Set: Appendix A to Johnson, K. S., Gordon, R. M. and Coale, K. H., 1997, What controls dissolved iron concentrations in the world ocean? Mar. Chem. 57: 137-161.
9	9	1986	-146.75	31.62	900	0.7	0.7168	VtexVI		Johnson - MLML World Iron Data Set: Appendix A to Johnson, K. S., Gordon, R. M. and Coale, K. H., 1997, What controls dissolved iron concentrations in the world ocean? Mar. Chem. 57: 137-161.
9	12	1986	-137.42	26.43	920	0.65	0.6656	VtexVI		Johnson - MLML World Iron Data Set: Appendix A to Johnson, K. S., Gordon, R. M. and Coale, K. H., 1997, What controls dissolved iron concentrations in the world ocean? Mar. Chem. 57: 137-161.
9	18	1986	-140.77	39.77	990	0.71	0.72704	VtexVI		Johnson - MLML World Iron Data Set: Appendix A to Johnson, K. S., Gordon, R. M. and Coale, K. H., 1997, What controls dissolved iron concentrations in the world ocean? Mar. Chem. 57: 137-161.
9	3	1986	-129.78	34.9	995	1	1.024	VtexVI		Johnson - MLML World Iron Data Set: Appendix A to Johnson, K. S., Gordon, R. M. and Coale, K. H., 1997, What controls dissolved iron concentrations in the world ocean? Mar. Chem. 57: 137-161.
9	9	1986	-146.75	31.62	1000	0.75	0.768	VtexVI		Johnson - MLML World Iron Data Set: Appendix A to Johnson, K. S., Gordon, R. M. and Coale, K. H., 1997, What controls dissolved iron concentrations in the world ocean? Mar. Chem. 57: 137-161.
9	15	1986	-139	33.05	1000	0.88	0.90112	VtexVI		Johnson - MLML World Iron Data Set: Appendix A to Johnson, K. S., Gordon, R. M. and Coale, K. H., 1997, What controls dissolved iron concentrations in the world ocean? Mar. Chem. 57: 137-161.
9	12	1986	-137.42	26.43	1020	0.62	0.63488	VtexVI		Johnson - MLML World Iron Data Set: Appendix A to Johnson, K. S., Gordon, R. M. and Coale, K. H., 1997, What controls dissolved iron concentrations in the world ocean? Mar. Chem. 57: 137-161.
6	8	1984	-133.79	34.93	1085	1.03	1.05472	VtexV		Johnson - MLML World Iron Data Set: Appendix A to Johnson, K. S., Gordon, R. M. and Coale, K. H., 1997, What controls dissolved iron concentrations in the world ocean? Mar. Chem. 57: 137-161.
9	18	1986	-140.77	39.77	1185	0.7	0.7168	VtexVI		Johnson - MLML World Iron Data Set: Appendix A to Johnson, K. S., Gordon, R. M. and Coale, K. H., 1997, What controls dissolved iron concentrations in the world ocean? Mar. Chem. 57: 137-161.
9	9	1986	-146.75	31.62	1200	0.7	0.7168	VtexVI		Johnson - MLML World Iron Data Set: Appendix A to Johnson, K. S., Gordon, R. M. and Coale, K. H., 1997, What controls dissolved iron concentrations in the world ocean? Mar. Chem. 57: 137-161.
6	8	1984	-133.79	34.93	1280	0.75	0.768	VtexV		Johnson - MLML World Iron Data Set: Appendix A to Johnson, K. S., Gordon, R. M. and Coale, K. H., 1997, What controls dissolved iron concentrations in the world ocean? Mar. Chem. 57: 137-161.
9	9	1986	-146.75	31.62	1400	0.7	0.7168	VtexVI		Johnson - MLML World Iron Data Set: Appendix A to Johnson, K. S., Gordon, R. M. and Coale, K. H., 1997, What controls dissolved iron concentrations in the world ocean? Mar. Chem. 57: 137-161.
9	15	1986	-139	33.05	1400	0.78	0.79872	VtexVI		Johnson - MLML World Iron Data Set: Appendix A to Johnson, K. S., Gordon, R. M. and Coale, K. H., 1997, What controls dissolved iron concentrations in the world ocean? Mar. Chem. 57: 137-161.
9	12	1986	-137.42	26.43	1410	0.78	0.79872	VtexVI		Johnson - MLML World Iron Data Set: Appendix A to Johnson, K. S., Gordon, R. M. and Coale, K. H., 1997, What controls dissolved iron concentrations in the world ocean? Mar. Chem. 57: 137-161.
6	8	1984	-133.79	34.93	1480	0.82	0.83968	VtexV		Johnson - MLML World Iron Data Set: Appendix A to Johnson, K. S., Gordon, R. M. and Coale, K. H., 1997, What controls dissolved iron concentrations in the world ocean? Mar. Chem. 57: 137-161.
6	8	1984	-133.79	34.93	1695	0.72	0.73728	VtexV		Johnson - MLML World Iron Data Set: Appendix A to Johnson, K. S., Gordon, R. M. and Coale, K. H., 1997, What controls dissolved iron concentrations in the world ocean? Mar. Chem. 57: 137-161.
6	8	1984	-133.79	34.93	1935	0.65	0.6656	VtexV		Johnson - MLML World Iron Data Set: Appendix A to Johnson, K. S., Gordon, R. M. and Coale, K. H., 1997, What controls dissolved iron concentrations in the world ocean? Mar. Chem. 57: 137-161.
4	6	1999	-122.22	36.41	2		1.6			Johnson et al., 2001. The annual cycle of iron .. Ca coastal waters. GRL, 28: 1247-1250, 2001.
4	27	1999	-122.22	36.41	2		0.91			Johnson et al., 2001. The annual cycle of iron .. Ca coastal waters. GRL, 28: 1247-1250, 2001.
5	11	1999	-122.22	36.41	2		0.54			Johnson et al., 2001. The annual cycle of iron .. Ca coastal waters. GRL, 28: 1247-1250, 2001.
7	13	1999	-122.22	36.41	2		0.75			Johnson et al., 2001. The annual cycle of iron .. Ca coastal waters. GRL, 28: 1247-1250, 2001.
8	3	1999	-122.22	36.41	2		0.56			Johnson et al., 2001. The annual cycle of iron .. Ca coastal waters. GRL, 28: 1247-1250, 2001.
9	13	1999	-122.22	36.41	2		0.56			Johnson et al., 2001. The annual cycle of iron .. Ca coastal waters. GRL, 28: 1247-1250, 2001.
10	5	1999	-122.22	36.41	2		0.8			Johnson et al., 2001. The annual cycle of iron .. Ca coastal waters. GRL, 28: 1247-1250, 2001.
10	26	1999	-122.22	36.41	2		0.25			Johnson et al., 2001. The annual cycle of iron .. Ca coastal waters. GRL, 28: 1247-1250, 2001.
12	6	1999	-122.22	36.41	2		0.7			Johnson et al., 2001. The annual cycle of iron .. Ca coastal waters. GRL, 28: 1247-1250, 2001.
1	11	2000	-122.22	36.41	2		1.3			Johnson et al., 2001. The annual cycle of iron .. Ca coastal waters. GRL, 28: 1247-1250, 2001.
2	1	2000	-122.22	36.41	2		1.86			Johnson et al., 2001. The annual cycle of iron .. Ca coastal waters. GRL, 28: 1247-1250, 2001.
4	12	2000	-122.22	36.41	2		1.15			Johnson et al., 2001. The annual cycle of iron .. Ca coastal waters. GRL, 28: 1247-1250, 2001.
5	9	2000	-122.22	36.41	2		0.5			Johnson et al., 2001. The annual cycle of iron .. Ca coastal waters. GRL, 28: 1247-1250, 2001.
6	20	2000	-122.22	36.41	2		0.21			Johnson et al., 2001. The annual cycle of iron .. Ca coastal waters. GRL, 28: 1247-1250, 2001.
7	11	2000	-122.22	36.41	2		0.26			Johnson et al., 2001. The annual cycle of iron .. Ca coastal waters. GRL, 28: 1247-1250, 2001.
10	3	2000	-122.22	36.41	2		0.11			Johnson et al., 2001. The annual cycle of iron .. Ca coastal waters. GRL, 28: 1247-1250, 2001.
10	24	2000	-122.22	36.41	2		0.16			Johnson et al., 2001. The annual cycle of iron .. Ca coastal waters. GRL, 28: 1247-1250, 2001.
11	16	2000	-122.22	36.41	2		0.45			Johnson et al., 2001. The annual cycle of iron .. Ca coastal waters. GRL, 28: 1247-1250, 2001.
12	20	2000	-122.22	36.41	2		2.3			Johnson et al., 2001. The annual cycle of iron .. Ca coastal waters. GRL, 28: 1247-1250, 2001.
1	17	2001	-122.22	36.41	2		1.49			Johnson et al., 2001. The annual cycle of iron .. Ca coastal waters. GRL, 28: 1247-1250, 2001.
2	27	2001	-122.22	36.41	2		0.39			Johnson et al., 2001. The annual cycle of iron .. Ca coastal waters. GRL, 28: 1247-1250, 2001.
4	5	2001	-122.22	36.41	2		2.19			Johnson et al., 2001. The annual cycle of iron .. Ca coastal waters. GRL, 28: 1247-1250, 2001.
4	25	2001	-122.22	36.41	2		1.52			Johnson et al., 2001. The annual cycle of iron .. Ca coastal waters. GRL, 28: 1247-1250, 2001.
5	15	2001	-122.22	36.41	2		0.4			Johnson et al., 2001. The annual cycle of iron .. Ca coastal waters. GRL, 28: 1247-1250, 2001.
6	27	2001	-122.22	36.41	2		0.3			Johnson et al., 2001. The annual cycle of iron .. Ca coastal waters. GRL, 28: 1247-1250, 2001.
7	19	2001	-122.22	36.41	2		0.38			Johnson et al., 2001. The annual cycle of iron .. Ca coastal waters. GRL, 28: 1247-1250, 2001.
9	5	2001	-122.22	36.41	2		0.74			Johnson et al., 2001. The annual cycle of iron .. Ca coastal waters. GRL, 28: 1247-1250, 2001.
9	26	2001	-122.22	36.41	2		0.16			Johnson et al., 2001. The annual cycle of iron .. Ca coastal waters. GRL, 28: 1247-1250, 2001.
10	16	2001	-122.22	36.41	2		0.14			Johnson et al., 2001. The annual cycle of iron .. Ca coastal waters. GRL, 28: 1247-1250, 2001.
11	8	2001	-122.22	36.41	2		0.65			Johnson et al., 2001. The annual cycle of iron .. Ca coastal waters. GRL, 28: 1247-1250, 2001.
11	27	2001	-122.22	36.41	2		0.7			Johnson et al., 2001. The annual cycle of iron .. Ca coastal waters. GRL, 28: 1247-1250, 2001.
12	18	2001	-122.22	36.41	2		0.22			Johnson et al., 2001. The annual cycle of iron .. Ca coastal waters. GRL, 28: 1247-1250, 2001.
3	11	2002	-122.22	36.41	2		0.4			Johnson et al., 2001. The annual cycle of iron .. Ca coastal waters. GRL, 28: 1247-1250, 2001.
4	4	2002	-122.22	36.41	2		0.49			Johnson et al., 2001. The annual cycle of iron .. Ca coastal waters. GRL, 28: 1247-1250, 2001.
4	23	2002	-122.22	36.41	2		0.86			Johnson et al., 2001. The annual cycle of iron .. Ca coastal waters. GRL, 28: 1247-1250, 2001.
5	13	2002	-122.22	36.41	2		0.67			Johnson et al., 2001. The annual cycle of iron .. Ca coastal waters. GRL, 28: 1247-1250, 2001.
6	3	2002	-122.22	36.41	2		0.4			Johnson et al., 2001. The annual cycle of iron .. Ca coastal waters. GRL, 28: 1247-1250, 2001.
6	14	2002	-122.22	36.41	2		0.79			Johnson et al., 2001. The annual cycle of iron .. Ca coastal waters. GRL, 28: 1247-1250, 2001.
7	2	2002	-122.22	36.41	2		0.64			Johnson et al., 2001. The annual cycle of iron .. Ca coastal waters. GRL, 28: 1247-1250, 2001.
8	8	2002	-122.22	36.41	2		0.22			Johnson et al., 2001. The annual cycle of iron .. Ca coastal waters. GRL, 28: 1247-1250, 2001.
8	26	2002	-122.22	36.41	2		0.32			Johnson et al., 2001. The annual cycle of iron .. Ca coastal waters. GRL, 28: 1247-1250, 2001.
9	17	2002	-122.22	36.41	2		0.54			Johnson et al., 2001. The annual cycle of iron .. Ca coastal waters. GRL, 28: 1247-1250, 2001.
10	8	2002	-122.22	36.41	2		0.46			Johnson et al., 2001. The annual cycle of iron .. Ca coastal waters. GRL, 28: 1247-1250, 2001.
10	28	2002	-122.22	36.41	2		0.27			Johnson et al., 2001. The annual cycle of iron .. Ca coastal waters. GRL, 28: 1247-1250, 2001.
1	6	2003	-122.22	36.41	2		0.32			Johnson et al., 2001. The annual cycle of iron .. Ca coastal waters. GRL, 28: 1247-1250, 2001.
1	27	2003	-122.22	36.41	2		0.27			Johnson et al., 2001. The annual cycle of iron .. Ca coastal waters. GRL, 28: 1247-1250, 2001.
3	6	2003	-122.22	36.41	2		0.51			Johnson et al., 2001. The annual cycle of iron .. Ca coastal waters. GRL, 28: 1247-1250, 2001.
4	14	2003	-122.22	36.41	2		0.9			Johnson et al., 2001. The annual cycle of iron .. Ca coastal waters. GRL, 28: 1247-1250, 2001.
4	29	2003	-122.22	36.41	2		0.53			Johnson et al., 2001. The annual cycle of iron .. Ca coastal waters. GRL, 28: 1247-1250, 2001.
5	12	2003	-122.22	36.41	2		0.54			Johnson et al., 2001. The annual cycle of iron .. Ca coastal waters. GRL, 28: 1247-1250, 2001.
6	24	2003	-122.22	36.41	2		0.33			Johnson et al., 2001. The annual cycle of iron .. Ca coastal waters. GRL, 28: 1247-1250, 2001.
8	21	2003	-122.22	36.41	2		0.65			Johnson et al., 2001. The annual cycle of iron .. Ca coastal waters. GRL, 28: 1247-1250, 2001.
9	17	2003	-122.22	36.41	2		0.29			Johnson et al., 2001. The annual cycle of iron .. Ca coastal waters. GRL, 28: 1247-1250, 2001.
10	8	2003	-122.22	36.41	2		0.7			Johnson et al., 2001. The annual cycle of iron .. Ca coastal waters. GRL, 28: 1247-1250, 2001.
11	18	2003	-122.22	36.41	2		0.42			Johnson et al., 2001. The annual cycle of iron .. Ca coastal waters. GRL, 28: 1247-1250, 2001.
12	18	2003	-122.22	36.41	2		0.51			Johnson et al., 2001. The annual cycle of iron .. Ca coastal waters. GRL, 28: 1247-1250, 2001.
1	21	2004	-122.22	36.41	2		0.45			Johnson et al., 2001. The annual cycle of iron .. Ca coastal waters. GRL, 28: 1247-1250, 2001.
2	18	2004	-122.22	36.41	2		2.59			Johnson et al., 2001. The annual cycle of iron .. Ca coastal waters. GRL, 28: 1247-1250, 2001.
3	10	2004	-122.22	36.41	2		0.75			Johnson et al., 2001. The annual cycle of iron .. Ca coastal waters. GRL, 28: 1247-1250, 2001.
5	3	2004	-122.22	36.41	2		0.32			Johnson et al., 2001. The annual cycle of iron .. Ca coastal waters. GRL, 28: 1247-1250, 2001.
5	25	2004	-122.22	36.41	2		0.63			Johnson et al., 2001. The annual cycle of iron .. Ca coastal waters. GRL, 28: 1247-1250, 2001.
7	7	2004	-122.22	36.41	2		1.16			Johnson et al., 2001. The annual cycle of iron .. Ca coastal waters. GRL, 28: 1247-1250, 2001.
7	27	2004	-122.22	36.41	2		0.45			Johnson et al., 2001. The annual cycle of iron .. Ca coastal waters. GRL, 28: 1247-1250, 2001.
8	17	2004	-122.22	36.41	2		0.19			Johnson et al., 2001. The annual cycle of iron .. Ca coastal waters. GRL, 28: 1247-1250, 2001.
9	8	2004	-122.22	36.41	2		0.48			Johnson et al., 2001. The annual cycle of iron .. Ca coastal waters. GRL, 28: 1247-1250, 2001.
9	29	2004	-122.22	36.41	2		0.26			Johnson et al., 2001. The annual cycle of iron .. Ca coastal waters. GRL, 28: 1247-1250, 2001.
11	9	2004	-122.22	36.41	2		0.54			Johnson et al., 2001. The annual cycle of iron .. Ca coastal waters. GRL, 28: 1247-1250, 2001.
11	30	2004	-122.22	36.41	2		1.43			Johnson et al., 2001. The annual cycle of iron .. Ca coastal waters. GRL, 28: 1247-1250, 2001.
12	13	2004	-122.22	36.41	2		0.13			Johnson et al., 2001. The annual cycle of iron .. Ca coastal waters. GRL, 28: 1247-1250, 2001.
4	6	1999	-122.1	36.44	2		5.1			Johnson et al., 2001. The annual cycle of iron .. Ca coastal waters. GRL, 28: 1247-1250, 2001.
4	27	1999	-122.1	36.44	2		1.22			Johnson et al., 2001. The annual cycle of iron .. Ca coastal waters. GRL, 28: 1247-1250, 2001.
5	11	1999	-122.1	36.44	2		4.44			Johnson et al., 2001. The annual cycle of iron .. Ca coastal waters. GRL, 28: 1247-1250, 2001.
8	31	1999	-122.1	36.44	2		0.52			Johnson et al., 2001. The annual cycle of iron .. Ca coastal waters. GRL, 28: 1247-1250, 2001.
8	25	1999	-122.1	36.44	2		1.19			Johnson et al., 2001. The annual cycle of iron .. Ca coastal waters. GRL, 28: 1247-1250, 2001.
9	13	1999	-122.1	36.44	2		0.43			Johnson et al., 2001. The annual cycle of iron .. Ca coastal waters. GRL, 28: 1247-1250, 2001.
10	5	1999	-122.1	36.44	2		0.51			Johnson et al., 2001. The annual cycle of iron .. Ca coastal waters. GRL, 28: 1247-1250, 2001.
10	26	1999	-122.1	36.44	2		0.21			Johnson et al., 2001. The annual cycle of iron .. Ca coastal waters. GRL, 28: 1247-1250, 2001.
1	11	2000	-122.1	36.44	2		2.12			Johnson et al., 2001. The annual cycle of iron .. Ca coastal waters. GRL, 28: 1247-1250, 2001.
3	8	2000	-122.1	36.44	2		1.37			Johnson et al., 2001. The annual cycle of iron .. Ca coastal waters. GRL, 28: 1247-1250, 2001.
3	21	2000	-122.1	36.44	2		1.44			Johnson et al., 2001. The annual cycle of iron .. Ca coastal waters. GRL, 28: 1247-1250, 2001.
3	28	2000	-122.1	36.44	2		1.79			Johnson et al., 2001. The annual cycle of iron .. Ca coastal waters. GRL, 28: 1247-1250, 2001.
4	12	2000	-122.1	36.44	2		0.74			Johnson et al., 2001. The annual cycle of iron .. Ca coastal waters. GRL, 28: 1247-1250, 2001.
5	9	2000	-122.1	36.44	2		0.7			Johnson et al., 2001. The annual cycle of iron .. Ca coastal waters. GRL, 28: 1247-1250, 2001.
6	20	2000	-122.1	36.44	2		0.3			Johnson et al., 2001. The annual cycle of iron .. Ca coastal waters. GRL, 28: 1247-1250, 2001.
7	11	2000	-122.1	36.44	2		0.55			Johnson et al., 2001. The annual cycle of iron .. Ca coastal waters. GRL, 28: 1247-1250, 2001.
8	3	1999	-122.1	36.44	2		0.52			Johnson et al., 2001. The annual cycle of iron .. Ca coastal waters. GRL, 28: 1247-1250, 2001.
9	8	2002	-122.1	36.44	2		0.43			Johnson et al., 2001. The annual cycle of iron .. Ca coastal waters. GRL, 28: 1247-1250, 2001.
10	3	2000	-122.1	36.44	2		0.28			Johnson et al., 2001. The annual cycle of iron .. Ca coastal waters. GRL, 28: 1247-1250, 2001.
10	24	2000	-122.1	36.44	2		0.39			Johnson et al., 2001. The annual cycle of iron .. Ca coastal waters. GRL, 28: 1247-1250, 2001.
11	16	2000	-122.1	36.44	2		0.32			Johnson et al., 2001. The annual cycle of iron .. Ca coastal waters. GRL, 28: 1247-1250, 2001.
12	20	2000	-122.1	36.44	2		3.51			Johnson et al., 2001. The annual cycle of iron .. Ca coastal waters. GRL, 28: 1247-1250, 2001.
1	17	2001	-122.1	36.44	2		1.97			Johnson et al., 2001. The annual cycle of iron .. Ca coastal waters. GRL, 28: 1247-1250, 2001.
2	27	2001	-122.1	36.44	2		0.7			Johnson et al., 2001. The annual cycle of iron .. Ca coastal waters. GRL, 28: 1247-1250, 2001.
4	5	2001	-122.1	36.44	2		1.97			Johnson et al., 2001. The annual cycle of iron .. Ca coastal waters. GRL, 28: 1247-1250, 2001.
4	25	2001	-122.1	36.44	2		2.48			Johnson et al., 2001. The annual cycle of iron .. Ca coastal waters. GRL, 28: 1247-1250, 2001.
5	15	2001	-122.1	36.44	2		0.55			Johnson et al., 2001. The annual cycle of iron .. Ca coastal waters. GRL, 28: 1247-1250, 2001.
6	27	2001	-122.1	36.44	2		0.26			Johnson et al., 2001. The annual cycle of iron .. Ca coastal waters. GRL, 28: 1247-1250, 2001.
7	19	2001	-122.1	36.44	2		0.71			Johnson et al., 2001. The annual cycle of iron .. Ca coastal waters. GRL, 28: 1247-1250, 2001.
9	5	2001	-122.1	36.44	2		0.99			Johnson et al., 2001. The annual cycle of iron .. Ca coastal waters. GRL, 28: 1247-1250, 2001.
9	26	2001	-122.1	36.44	2		0.21			Johnson et al., 2001. The annual cycle of iron .. Ca coastal waters. GRL, 28: 1247-1250, 2001.
10	16	2001	-122.1	36.44	2		0.21			Johnson et al., 2001. The annual cycle of iron .. Ca coastal waters. GRL, 28: 1247-1250, 2001.
11	8	2001	-122.1	36.44	2		1.64			Johnson et al., 2001. The annual cycle of iron .. Ca coastal waters. GRL, 28: 1247-1250, 2001.
11	27	2001	-122.1	36.44	2		1.26			Johnson et al., 2001. The annual cycle of iron .. Ca coastal waters. GRL, 28: 1247-1250, 2001.
12	18	2001	-122.1	36.44	2		0.11			Johnson et al., 2001. The annual cycle of iron .. Ca coastal waters. GRL, 28: 1247-1250, 2001.
3	11	2002	-122.1	36.44	2		0.41			Johnson et al., 2001. The annual cycle of iron .. Ca coastal waters. GRL, 28: 1247-1250, 2001.
4	4	2002	-122.1	36.44	2		0.48			Johnson et al., 2001. The annual cycle of iron .. Ca coastal waters. GRL, 28: 1247-1250, 2001.
4	23	2002	-122.1	36.44	2		0.98			Johnson et al., 2001. The annual cycle of iron .. Ca coastal waters. GRL, 28: 1247-1250, 2001.
5	13	2002	-122.1	36.44	2		2.2			Johnson et al., 2001. The annual cycle of iron .. Ca coastal waters. GRL, 28: 1247-1250, 2001.
6	3	2002	-122.1	36.44	2		0.44			Johnson et al., 2001. The annual cycle of iron .. Ca coastal waters. GRL, 28: 1247-1250, 2001.
6	14	2002	-122.1	36.44	2		0.8			Johnson et al., 2001. The annual cycle of iron .. Ca coastal waters. GRL, 28: 1247-1250, 2001.
8	26	2002	-122.1	36.44	2		0.44			Johnson et al., 2001. The annual cycle of iron .. Ca coastal waters. GRL, 28: 1247-1250, 2001.
9	17	2002	-122.1	36.44	2		0.54			Johnson et al., 2001. The annual cycle of iron .. Ca coastal waters. GRL, 28: 1247-1250, 2001.
10	8	2002	-122.1	36.44	2		0.3			Johnson et al., 2001. The annual cycle of iron .. Ca coastal waters. GRL, 28: 1247-1250, 2001.
10	28	2002	-122.1	36.44	2		0.35			Johnson et al., 2001. The annual cycle of iron .. Ca coastal waters. GRL, 28: 1247-1250, 2001.
11	26	2002	-122.1	36.44	2		2.21			Johnson et al., 2001. The annual cycle of iron .. Ca coastal waters. GRL, 28: 1247-1250, 2001.
1	6	2003	-122.1	36.44	2		0.95			Johnson et al., 2001. The annual cycle of iron .. Ca coastal waters. GRL, 28: 1247-1250, 2001.
1	27	2003	-122.1	36.44	2		0.39			Johnson et al., 2001. The annual cycle of iron .. Ca coastal waters. GRL, 28: 1247-1250, 2001.
3	6	2003	-122.1	36.44	2		0.76			Johnson et al., 2001. The annual cycle of iron .. Ca coastal waters. GRL, 28: 1247-1250, 2001.
7	2	2002	-122.1	36.44	2		0.66			Johnson et al., 2001. The annual cycle of iron .. Ca coastal waters. GRL, 28: 1247-1250, 2001.
3	27	2003	-122.1	36.44	2		2.04			Johnson et al., 2001. The annual cycle of iron .. Ca coastal waters. GRL, 28: 1247-1250, 2001.
4	14	2003	-122.1	36.44	2		0.71			Johnson et al., 2001. The annual cycle of iron .. Ca coastal waters. GRL, 28: 1247-1250, 2001.
4	29	2003	-122.1	36.44	2		0.88			Johnson et al., 2001. The annual cycle of iron .. Ca coastal waters. GRL, 28: 1247-1250, 2001.
5	12	2003	-122.1	36.44	2		2.56			Johnson et al., 2001. The annual cycle of iron .. Ca coastal waters. GRL, 28: 1247-1250, 2001.
6	24	2003	-122.1	36.44	2		0.75			Johnson et al., 2001. The annual cycle of iron .. Ca coastal waters. GRL, 28: 1247-1250, 2001.
8	21	2003	-122.1	36.44	2		0.97			Johnson et al., 2001. The annual cycle of iron .. Ca coastal waters. GRL, 28: 1247-1250, 2001.
9	17	2003	-122.1	36.44	2		0.25			Johnson et al., 2001. The annual cycle of iron .. Ca coastal waters. GRL, 28: 1247-1250, 2001.
10	8	2003	-122.1	36.44	2		0.9			Johnson et al., 2001. The annual cycle of iron .. Ca coastal waters. GRL, 28: 1247-1250, 2001.
11	18	2003	-122.1	36.44	2		0.41			Johnson et al., 2001. The annual cycle of iron .. Ca coastal waters. GRL, 28: 1247-1250, 2001.
12	18	2003	-122.1	36.44	2		1.5			Johnson et al., 2001. The annual cycle of iron .. Ca coastal waters. GRL, 28: 1247-1250, 2001.
1	21	2004	-122.1	36.44	2		0.42			Johnson et al., 2001. The annual cycle of iron .. Ca coastal waters. GRL, 28: 1247-1250, 2001.
2	18	2004	-122.1	36.44	2		2.08			Johnson et al., 2001. The annual cycle of iron .. Ca coastal waters. GRL, 28: 1247-1250, 2001.
3	10	2004	-122.1	36.44	2		1.16			Johnson et al., 2001. The annual cycle of iron .. Ca coastal waters. GRL, 28: 1247-1250, 2001.
3	31	2004	-122.1	36.44	2		1.37			Johnson et al., 2001. The annual cycle of iron .. Ca coastal waters. GRL, 28: 1247-1250, 2001.
5	3	2004	-122.1	36.44	2		0.4			Johnson et al., 2001. The annual cycle of iron .. Ca coastal waters. GRL, 28: 1247-1250, 2001.
5	25	2004	-122.1	36.44	2		0.69			Johnson et al., 2001. The annual cycle of iron .. Ca coastal waters. GRL, 28: 1247-1250, 2001.
6	15	2004	-122.1	36.44	2		0.68			Johnson et al., 2001. The annual cycle of iron .. Ca coastal waters. GRL, 28: 1247-1250, 2001.
7	7	2004	-122.1	36.44	2		0.9			Johnson et al., 2001. The annual cycle of iron .. Ca coastal waters. GRL, 28: 1247-1250, 2001.
7	27	2004	-122.1	36.44	2		0.89			Johnson et al., 2001. The annual cycle of iron .. Ca coastal waters. GRL, 28: 1247-1250, 2001.
8	17	2004	-122.1	36.44	2		0.26			Johnson et al., 2001. The annual cycle of iron .. Ca coastal waters. GRL, 28: 1247-1250, 2001.
9	8	2004	-122.1	36.44	2		0.94			Johnson et al., 2001. The annual cycle of iron .. Ca coastal waters. GRL, 28: 1247-1250, 2001.
9	29	2004	-122.1	36.44	2		0.66			Johnson et al., 2001. The annual cycle of iron .. Ca coastal waters. GRL, 28: 1247-1250, 2001.
11	9	2004	-122.1	36.44	2		0.9			Johnson et al., 2001. The annual cycle of iron .. Ca coastal waters. GRL, 28: 1247-1250, 2001.
11	30	2004	-122.1	36.44	2		1.42			Johnson et al., 2001. The annual cycle of iron .. Ca coastal waters. GRL, 28: 1247-1250, 2001.
12	13	2004	-122.1	36.44	2		0.31			Johnson et al., 2001. The annual cycle of iron .. Ca coastal waters. GRL, 28: 1247-1250, 2001.
7	13	1999	-122.1	36.44	2		0.81			Johnson et al., 2001. The annual cycle of iron .. Ca coastal waters. GRL, 28: 1247-1250, 2001.
5	23-31, 1	2001	-136.785	30.7658	0		0.0632556	NEPac		Johnson, K.S., Elrod, V., Fitzwater, S., Plant, J.N., Chavez, F.P., Tanner, S.J., Gordon, M., Westphal, D.L., Perry, K.D., Wu, J., and Karl, D.M., 2003. Surface ocean-lower atmosphere interactions in the Northeast Pacific Ocean Gyre: Aerosols, iron, and the ecosystem response, GBC(17), 10.1029/2002GB002004		dissolvable' iron - could include colloidal also	profiles after dust storm
5	23-31, 1	2001	-150.027	25.6882	0		0.228299	NEPac		Johnson, K.S., Elrod, V., Fitzwater, S., Plant, J.N., Chavez, F.P., Tanner, S.J., Gordon, M., Westphal, D.L., Perry, K.D., Wu, J., and Karl, D.M., 2003. Surface ocean-lower atmosphere interactions in the Northeast Pacific Ocean Gyre: Aerosols, iron, and the ecosystem response, GBC(17), 10.1029/2002GB002004		dissolvable' iron - could include colloidal also	profiles after dust storm
3	13-27	2001	-141.364	28.9256	0		0.189802	NEPac		Johnson, K.S., Elrod, V., Fitzwater, S., Plant, J.N., Chavez, F.P., Tanner, S.J., Gordon, M., Westphal, D.L., Perry, K.D., Wu, J., and Karl, D.M., 2003. Surface ocean-lower atmosphere interactions in the Northeast Pacific Ocean Gyre: Aerosols, iron, and the ecosystem response, GBC(17), 10.1029/2002GB002004		dissolvable' iron - could include colloidal also	profiles after dust storm
3	13-27	2001	-143.123	28.316	0		0.108714	NEPac		Johnson, K.S., Elrod, V., Fitzwater, S., Plant, J.N., Chavez, F.P., Tanner, S.J., Gordon, M., Westphal, D.L., Perry, K.D., Wu, J., and Karl, D.M., 2003. Surface ocean-lower atmosphere interactions in the Northeast Pacific Ocean Gyre: Aerosols, iron, and the ecosystem response, GBC(17), 10.1029/2002GB002004		dissolvable' iron - could include colloidal also	profiles after dust storm
3	13-27	2001	-124.456	35.6629	0		0.405256	NEPac		Johnson, K.S., Elrod, V., Fitzwater, S., Plant, J.N., Chavez, F.P., Tanner, S.J., Gordon, M., Westphal, D.L., Perry, K.D., Wu, J., and Karl, D.M., 2003. Surface ocean-lower atmosphere interactions in the Northeast Pacific Ocean Gyre: Aerosols, iron, and the ecosystem response, GBC(17), 10.1029/2002GB002004		dissolvable' iron - could include colloidal also	profiles after dust storm
3	13-27	2001	-124.84	35.48	0		0.451527	NEPac		Johnson, K.S., Elrod, V., Fitzwater, S., Plant, J.N., Chavez, F.P., Tanner, S.J., Gordon, M., Westphal, D.L., Perry, K.D., Wu, J., and Karl, D.M., 2003. Surface ocean-lower atmosphere interactions in the Northeast Pacific Ocean Gyre: Aerosols, iron, and the ecosystem response, GBC(17), 10.1029/2002GB002004		dissolvable' iron - could include colloidal also	profiles after dust storm
5	23-31, 1	2001	-122.052	36.7047	0		0.167156	NEPac		Johnson, K.S., Elrod, V., Fitzwater, S., Plant, J.N., Chavez, F.P., Tanner, S.J., Gordon, M., Westphal, D.L., Perry, K.D., Wu, J., and Karl, D.M., 2003. Surface ocean-lower atmosphere interactions in the Northeast Pacific Ocean Gyre: Aerosols, iron, and the ecosystem response, GBC(17), 10.1029/2002GB002004		dissolvable' iron - could include colloidal also	profiles after dust storm
3	13-27	2001	-130.508	33.1668	0		0.150144	NEPac		Johnson, K.S., Elrod, V., Fitzwater, S., Plant, J.N., Chavez, F.P., Tanner, S.J., Gordon, M., Westphal, D.L., Perry, K.D., Wu, J., and Karl, D.M., 2003. Surface ocean-lower atmosphere interactions in the Northeast Pacific Ocean Gyre: Aerosols, iron, and the ecosystem response, GBC(17), 10.1029/2002GB002004		dissolvable' iron - could include colloidal also	profiles after dust storm
5	23-31, 1	2001	-153	24.54	0		0.498088	NEPac		Johnson, K.S., Elrod, V., Fitzwater, S., Plant, J.N., Chavez, F.P., Tanner, S.J., Gordon, M., Westphal, D.L., Perry, K.D., Wu, J., and Karl, D.M., 2003. Surface ocean-lower atmosphere interactions in the Northeast Pacific Ocean Gyre: Aerosols, iron, and the ecosystem response, GBC(17), 10.1029/2002GB002004		dissolvable' iron - could include colloidal also	profiles after dust storm
3	13-27	2001	-135.706	31.1217	0		0.134087	NEPac		Johnson, K.S., Elrod, V., Fitzwater, S., Plant, J.N., Chavez, F.P., Tanner, S.J., Gordon, M., Westphal, D.L., Perry, K.D., Wu, J., and Karl, D.M., 2003. Surface ocean-lower atmosphere interactions in the Northeast Pacific Ocean Gyre: Aerosols, iron, and the ecosystem response, GBC(17), 10.1029/2002GB002004		dissolvable' iron - could include colloidal also	profiles after dust storm
3	13-27	2001	-123.742	36.0001	0		0.519118	NEPac		Johnson, K.S., Elrod, V., Fitzwater, S., Plant, J.N., Chavez, F.P., Tanner, S.J., Gordon, M., Westphal, D.L., Perry, K.D., Wu, J., and Karl, D.M., 2003. Surface ocean-lower atmosphere interactions in the Northeast Pacific Ocean Gyre: Aerosols, iron, and the ecosystem response, GBC(17), 10.1029/2002GB002004		dissolvable' iron - could include colloidal also	profiles after dust storm
3	13-27	2001	-147.22	26.6641	0		0.18139	NEPac		Johnson, K.S., Elrod, V., Fitzwater, S., Plant, J.N., Chavez, F.P., Tanner, S.J., Gordon, M., Westphal, D.L., Perry, K.D., Wu, J., and Karl, D.M., 2003. Surface ocean-lower atmosphere interactions in the Northeast Pacific Ocean Gyre: Aerosols, iron, and the ecosystem response, GBC(17), 10.1029/2002GB002004		dissolvable' iron - could include colloidal also	profiles after dust storm
3	13-27	2001	-149.783	25.7616	0		0.15363	NEPac		Johnson, K.S., Elrod, V., Fitzwater, S., Plant, J.N., Chavez, F.P., Tanner, S.J., Gordon, M., Westphal, D.L., Perry, K.D., Wu, J., and Karl, D.M., 2003. Surface ocean-lower atmosphere interactions in the Northeast Pacific Ocean Gyre: Aerosols, iron, and the ecosystem response, GBC(17), 10.1029/2002GB002004		dissolvable' iron - could include colloidal also	profiles after dust storm
3	13-27	2001	-154.4	23.9738	0		0.175223	NEPac		Johnson, K.S., Elrod, V., Fitzwater, S., Plant, J.N., Chavez, F.P., Tanner, S.J., Gordon, M., Westphal, D.L., Perry, K.D., Wu, J., and Karl, D.M., 2003. Surface ocean-lower atmosphere interactions in the Northeast Pacific Ocean Gyre: Aerosols, iron, and the ecosystem response, GBC(17), 10.1029/2002GB002004		dissolvable' iron - could include colloidal also	profiles after dust storm
3	13-27	2001	-147.682	26.51	0		0.221152	NEPac		Johnson, K.S., Elrod, V., Fitzwater, S., Plant, J.N., Chavez, F.P., Tanner, S.J., Gordon, M., Westphal, D.L., Perry, K.D., Wu, J., and Karl, D.M., 2003. Surface ocean-lower atmosphere interactions in the Northeast Pacific Ocean Gyre: Aerosols, iron, and the ecosystem response, GBC(17), 10.1029/2002GB002004		dissolvable' iron - could include colloidal also	profiles after dust storm
3	13-27	2001	-145.326	27.5486	0		0.149678	NEPac		Johnson, K.S., Elrod, V., Fitzwater, S., Plant, J.N., Chavez, F.P., Tanner, S.J., Gordon, M., Westphal, D.L., Perry, K.D., Wu, J., and Karl, D.M., 2003. Surface ocean-lower atmosphere interactions in the Northeast Pacific Ocean Gyre: Aerosols, iron, and the ecosystem response, GBC(17), 10.1029/2002GB002004		dissolvable' iron - could include colloidal also	profiles after dust storm
3	13-27	2001	-153.914	24.1727	0		0.182626	NEPac		Johnson, K.S., Elrod, V., Fitzwater, S., Plant, J.N., Chavez, F.P., Tanner, S.J., Gordon, M., Westphal, D.L., Perry, K.D., Wu, J., and Karl, D.M., 2003. Surface ocean-lower atmosphere interactions in the Northeast Pacific Ocean Gyre: Aerosols, iron, and the ecosystem response, GBC(17), 10.1029/2002GB002004		dissolvable' iron - could include colloidal also	profiles after dust storm
3	13-27	2001	-148.871	26.09	0		0.154557	NEPac		Johnson, K.S., Elrod, V., Fitzwater, S., Plant, J.N., Chavez, F.P., Tanner, S.J., Gordon, M., Westphal, D.L., Perry, K.D., Wu, J., and Karl, D.M., 2003. Surface ocean-lower atmosphere interactions in the Northeast Pacific Ocean Gyre: Aerosols, iron, and the ecosystem response, GBC(17), 10.1029/2002GB002004		dissolvable' iron - could include colloidal also	profiles after dust storm
3	13-27	2001	-131.065	32.9547	0		0.094471	NEPac		Johnson, K.S., Elrod, V., Fitzwater, S., Plant, J.N., Chavez, F.P., Tanner, S.J., Gordon, M., Westphal, D.L., Perry, K.D., Wu, J., and Karl, D.M., 2003. Surface ocean-lower atmosphere interactions in the Northeast Pacific Ocean Gyre: Aerosols, iron, and the ecosystem response, GBC(17), 10.1029/2002GB002004		dissolvable' iron - could include colloidal also	profiles after dust storm
3	13-27	2001	-152.306	24.8181	0		0.208087	NEPac		Johnson, K.S., Elrod, V., Fitzwater, S., Plant, J.N., Chavez, F.P., Tanner, S.J., Gordon, M., Westphal, D.L., Perry, K.D., Wu, J., and Karl, D.M., 2003. Surface ocean-lower atmosphere interactions in the Northeast Pacific Ocean Gyre: Aerosols, iron, and the ecosystem response, GBC(17), 10.1029/2002GB002004		dissolvable' iron - could include colloidal also	profiles after dust storm
3	13-27	2001	-139.047	29.8511	0		0.163054	NEPac		Johnson, K.S., Elrod, V., Fitzwater, S., Plant, J.N., Chavez, F.P., Tanner, S.J., Gordon, M., Westphal, D.L., Perry, K.D., Wu, J., and Karl, D.M., 2003. Surface ocean-lower atmosphere interactions in the Northeast Pacific Ocean Gyre: Aerosols, iron, and the ecosystem response, GBC(17), 10.1029/2002GB002004		dissolvable' iron - could include colloidal also	profiles after dust storm
3	13-27	2001	-144.838	27.7297	0		0.187758	NEPac		Johnson, K.S., Elrod, V., Fitzwater, S., Plant, J.N., Chavez, F.P., Tanner, S.J., Gordon, M., Westphal, D.L., Perry, K.D., Wu, J., and Karl, D.M., 2003. Surface ocean-lower atmosphere interactions in the Northeast Pacific Ocean Gyre: Aerosols, iron, and the ecosystem response, GBC(17), 10.1029/2002GB002004		dissolvable' iron - could include colloidal also	profiles after dust storm
5	23-31, 1	2001	-134.882	31.4682	0		0.0986567	NEPac		Johnson, K.S., Elrod, V., Fitzwater, S., Plant, J.N., Chavez, F.P., Tanner, S.J., Gordon, M., Westphal, D.L., Perry, K.D., Wu, J., and Karl, D.M., 2003. Surface ocean-lower atmosphere interactions in the Northeast Pacific Ocean Gyre: Aerosols, iron, and the ecosystem response, GBC(17), 10.1029/2002GB002004		dissolvable' iron - could include colloidal also	profiles after dust storm
5	23-31, 1	2001	-131.746	32.7846	0		0.122371	NEPac		Johnson, K.S., Elrod, V., Fitzwater, S., Plant, J.N., Chavez, F.P., Tanner, S.J., Gordon, M., Westphal, D.L., Perry, K.D., Wu, J., and Karl, D.M., 2003. Surface ocean-lower atmosphere interactions in the Northeast Pacific Ocean Gyre: Aerosols, iron, and the ecosystem response, GBC(17), 10.1029/2002GB002004		dissolvable' iron - could include colloidal also	profiles after dust storm
3	13-27	2001	-126.764	34.7371	0		0.342406	NEPac		Johnson, K.S., Elrod, V., Fitzwater, S., Plant, J.N., Chavez, F.P., Tanner, S.J., Gordon, M., Westphal, D.L., Perry, K.D., Wu, J., and Karl, D.M., 2003. Surface ocean-lower atmosphere interactions in the Northeast Pacific Ocean Gyre: Aerosols, iron, and the ecosystem response, GBC(17), 10.1029/2002GB002004		dissolvable' iron - could include colloidal also	profiles after dust storm
3	13-27	2001	-128.255	34.1281	0		0.409517	NEPac		Johnson, K.S., Elrod, V., Fitzwater, S., Plant, J.N., Chavez, F.P., Tanner, S.J., Gordon, M., Westphal, D.L., Perry, K.D., Wu, J., and Karl, D.M., 2003. Surface ocean-lower atmosphere interactions in the Northeast Pacific Ocean Gyre: Aerosols, iron, and the ecosystem response, GBC(17), 10.1029/2002GB002004		dissolvable' iron - could include colloidal also	profiles after dust storm
3	13-27	2001	-133.804	31.9026	0		0.309313	NEPac		Johnson, K.S., Elrod, V., Fitzwater, S., Plant, J.N., Chavez, F.P., Tanner, S.J., Gordon, M., Westphal, D.L., Perry, K.D., Wu, J., and Karl, D.M., 2003. Surface ocean-lower atmosphere interactions in the Northeast Pacific Ocean Gyre: Aerosols, iron, and the ecosystem response, GBC(17), 10.1029/2002GB002004		dissolvable' iron - could include colloidal also	profiles after dust storm
3	13-27	2001	-124.536	35.6225	0		0.192172	NEPac		Johnson, K.S., Elrod, V., Fitzwater, S., Plant, J.N., Chavez, F.P., Tanner, S.J., Gordon, M., Westphal, D.L., Perry, K.D., Wu, J., and Karl, D.M., 2003. Surface ocean-lower atmosphere interactions in the Northeast Pacific Ocean Gyre: Aerosols, iron, and the ecosystem response, GBC(17), 10.1029/2002GB002004		dissolvable' iron - could include colloidal also	profiles after dust storm
3	13-27	2001	-125.74	35.0986	0		0.488409	NEPac		Johnson, K.S., Elrod, V., Fitzwater, S., Plant, J.N., Chavez, F.P., Tanner, S.J., Gordon, M., Westphal, D.L., Perry, K.D., Wu, J., and Karl, D.M., 2003. Surface ocean-lower atmosphere interactions in the Northeast Pacific Ocean Gyre: Aerosols, iron, and the ecosystem response, GBC(17), 10.1029/2002GB002004		dissolvable' iron - could include colloidal also	profiles after dust storm
3	13-27	2001	-125.279	35.311	0		0.506064	NEPac		Johnson, K.S., Elrod, V., Fitzwater, S., Plant, J.N., Chavez, F.P., Tanner, S.J., Gordon, M., Westphal, D.L., Perry, K.D., Wu, J., and Karl, D.M., 2003. Surface ocean-lower atmosphere interactions in the Northeast Pacific Ocean Gyre: Aerosols, iron, and the ecosystem response, GBC(17), 10.1029/2002GB002004		dissolvable' iron - could include colloidal also	profiles after dust storm
3	13-27	2001	-158.286	21.8125	0		0.221948	NEPac		Johnson, K.S., Elrod, V., Fitzwater, S., Plant, J.N., Chavez, F.P., Tanner, S.J., Gordon, M., Westphal, D.L., Perry, K.D., Wu, J., and Karl, D.M., 2003. Surface ocean-lower atmosphere interactions in the Northeast Pacific Ocean Gyre: Aerosols, iron, and the ecosystem response, GBC(17), 10.1029/2002GB002004		dissolvable' iron - could include colloidal also	profiles after dust storm
3	13-27	2001	-135.551	31.1875	0		0.188199	NEPac		Johnson, K.S., Elrod, V., Fitzwater, S., Plant, J.N., Chavez, F.P., Tanner, S.J., Gordon, M., Westphal, D.L., Perry, K.D., Wu, J., and Karl, D.M., 2003. Surface ocean-lower atmosphere interactions in the Northeast Pacific Ocean Gyre: Aerosols, iron, and the ecosystem response, GBC(17), 10.1029/2002GB002004		dissolvable' iron - could include colloidal also	profiles after dust storm
3	23-31, 1	2001	-143.23	28.25	0		0.279638	NEPac		Johnson, K.S., Elrod, V., Fitzwater, S., Plant, J.N., Chavez, F.P., Tanner, S.J., Gordon, M., Westphal, D.L., Perry, K.D., Wu, J., and Karl, D.M., 2003. Surface ocean-lower atmosphere interactions in the Northeast Pacific Ocean Gyre: Aerosols, iron, and the ecosystem response, GBC(17), 10.1029/2002GB002004		dissolvable' iron - could include colloidal also	profiles after dust storm
3	23-31, 1	2001	-122.44	36.5702	0		0.144255	NEPac		Johnson, K.S., Elrod, V., Fitzwater, S., Plant, J.N., Chavez, F.P., Tanner, S.J., Gordon, M., Westphal, D.L., Perry, K.D., Wu, J., and Karl, D.M., 2003. Surface ocean-lower atmosphere interactions in the Northeast Pacific Ocean Gyre: Aerosols, iron, and the ecosystem response, GBC(17), 10.1029/2002GB002004		dissolvable' iron - could include colloidal also	profiles after dust storm
3	23-31, 1	2001	-155.99	23.3175	0		0.95665	NEPac		Johnson, K.S., Elrod, V., Fitzwater, S., Plant, J.N., Chavez, F.P., Tanner, S.J., Gordon, M., Westphal, D.L., Perry, K.D., Wu, J., and Karl, D.M., 2003. Surface ocean-lower atmosphere interactions in the Northeast Pacific Ocean Gyre: Aerosols, iron, and the ecosystem response, GBC(17), 10.1029/2002GB002004		dissolvable' iron - could include colloidal also	profiles after dust storm
3	23-31, 1	2001	-150.675	25.4404	0		0.282023	NEPac		Johnson, K.S., Elrod, V., Fitzwater, S., Plant, J.N., Chavez, F.P., Tanner, S.J., Gordon, M., Westphal, D.L., Perry, K.D., Wu, J., and Karl, D.M., 2003. Surface ocean-lower atmosphere interactions in the Northeast Pacific Ocean Gyre: Aerosols, iron, and the ecosystem response, GBC(17), 10.1029/2002GB002004		dissolvable' iron - could include colloidal also	profiles after dust storm
3	13-27	2001	-133.772	31.9163	0		0.0752677	NEPac		Johnson, K.S., Elrod, V., Fitzwater, S., Plant, J.N., Chavez, F.P., Tanner, S.J., Gordon, M., Westphal, D.L., Perry, K.D., Wu, J., and Karl, D.M., 2003. Surface ocean-lower atmosphere interactions in the Northeast Pacific Ocean Gyre: Aerosols, iron, and the ecosystem response, GBC(17), 10.1029/2002GB002004		dissolvable' iron - could include colloidal also	profiles after dust storm
3	23-31, 1	2001	-136.742	30.7818	0		0.0628007	NEPac		Johnson, K.S., Elrod, V., Fitzwater, S., Plant, J.N., Chavez, F.P., Tanner, S.J., Gordon, M., Westphal, D.L., Perry, K.D., Wu, J., and Karl, D.M., 2003. Surface ocean-lower atmosphere interactions in the Northeast Pacific Ocean Gyre: Aerosols, iron, and the ecosystem response, GBC(17), 10.1029/2002GB002004		dissolvable' iron - could include colloidal also	profiles after dust storm
3	13-27	2001	-126.438	34.863	0		0.350104	NEPac		Johnson, K.S., Elrod, V., Fitzwater, S., Plant, J.N., Chavez, F.P., Tanner, S.J., Gordon, M., Westphal, D.L., Perry, K.D., Wu, J., and Karl, D.M., 2003. Surface ocean-lower atmosphere interactions in the Northeast Pacific Ocean Gyre: Aerosols, iron, and the ecosystem response, GBC(17), 10.1029/2002GB002004		dissolvable' iron - could include colloidal also	profiles after dust storm
3	13-27	2001	-125.26	35.3182	0		0.596739	NEPac		Johnson, K.S., Elrod, V., Fitzwater, S., Plant, J.N., Chavez, F.P., Tanner, S.J., Gordon, M., Westphal, D.L., Perry, K.D., Wu, J., and Karl, D.M., 2003. Surface ocean-lower atmosphere interactions in the Northeast Pacific Ocean Gyre: Aerosols, iron, and the ecosystem response, GBC(17), 10.1029/2002GB002004		dissolvable' iron - could include colloidal also	profiles after dust storm
3	13-27	2001	-130.063	33.362	0		0.227125	NEPac		Johnson, K.S., Elrod, V., Fitzwater, S., Plant, J.N., Chavez, F.P., Tanner, S.J., Gordon, M., Westphal, D.L., Perry, K.D., Wu, J., and Karl, D.M., 2003. Surface ocean-lower atmosphere interactions in the Northeast Pacific Ocean Gyre: Aerosols, iron, and the ecosystem response, GBC(17), 10.1029/2002GB002004		dissolvable' iron - could include colloidal also	profiles after dust storm
3	23-31, 1	2001	-128.051	34.2197	0		0.102282	NEPac		Johnson, K.S., Elrod, V., Fitzwater, S., Plant, J.N., Chavez, F.P., Tanner, S.J., Gordon, M., Westphal, D.L., Perry, K.D., Wu, J., and Karl, D.M., 2003. Surface ocean-lower atmosphere interactions in the Northeast Pacific Ocean Gyre: Aerosols, iron, and the ecosystem response, GBC(17), 10.1029/2002GB002004		dissolvable' iron - could include colloidal also	profiles after dust storm
3	13-27	2001	-127.243	34.5446	0		0.161331	NEPac		Johnson, K.S., Elrod, V., Fitzwater, S., Plant, J.N., Chavez, F.P., Tanner, S.J., Gordon, M., Westphal, D.L., Perry, K.D., Wu, J., and Karl, D.M., 2003. Surface ocean-lower atmosphere interactions in the Northeast Pacific Ocean Gyre: Aerosols, iron, and the ecosystem response, GBC(17), 10.1029/2002GB002004		dissolvable' iron - could include colloidal also	profiles after dust storm
3	13-27	2001	-136.143	30.9375	0		0.147088	NEPac		Johnson, K.S., Elrod, V., Fitzwater, S., Plant, J.N., Chavez, F.P., Tanner, S.J., Gordon, M., Westphal, D.L., Perry, K.D., Wu, J., and Karl, D.M., 2003. Surface ocean-lower atmosphere interactions in the Northeast Pacific Ocean Gyre: Aerosols, iron, and the ecosystem response, GBC(17), 10.1029/2002GB002004		dissolvable' iron - could include colloidal also	profiles after dust storm
3	13-27	2001	-140.516	29.2711	0		0.117669	NEPac		Johnson, K.S., Elrod, V., Fitzwater, S., Plant, J.N., Chavez, F.P., Tanner, S.J., Gordon, M., Westphal, D.L., Perry, K.D., Wu, J., and Karl, D.M., 2003. Surface ocean-lower atmosphere interactions in the Northeast Pacific Ocean Gyre: Aerosols, iron, and the ecosystem response, GBC(17), 10.1029/2002GB002004		dissolvable' iron - could include colloidal also	profiles after dust storm
3	23-31, 1	2001	-132.429	32.5071	0		0.0853397	NEPac		Johnson, K.S., Elrod, V., Fitzwater, S., Plant, J.N., Chavez, F.P., Tanner, S.J., Gordon, M., Westphal, D.L., Perry, K.D., Wu, J., and Karl, D.M., 2003. Surface ocean-lower atmosphere interactions in the Northeast Pacific Ocean Gyre: Aerosols, iron, and the ecosystem response, GBC(17), 10.1029/2002GB002004		dissolvable' iron - could include colloidal also	profiles after dust storm
3	13-27	2001	-123.985	35.9093	0		0.842884	NEPac		Johnson, K.S., Elrod, V., Fitzwater, S., Plant, J.N., Chavez, F.P., Tanner, S.J., Gordon, M., Westphal, D.L., Perry, K.D., Wu, J., and Karl, D.M., 2003. Surface ocean-lower atmosphere interactions in the Northeast Pacific Ocean Gyre: Aerosols, iron, and the ecosystem response, GBC(17), 10.1029/2002GB002004		dissolvable' iron - could include colloidal also	profiles after dust storm
3	13-27	2001	-129.657	33.5384	0		0.281264	NEPac		Johnson, K.S., Elrod, V., Fitzwater, S., Plant, J.N., Chavez, F.P., Tanner, S.J., Gordon, M., Westphal, D.L., Perry, K.D., Wu, J., and Karl, D.M., 2003. Surface ocean-lower atmosphere interactions in the Northeast Pacific Ocean Gyre: Aerosols, iron, and the ecosystem response, GBC(17), 10.1029/2002GB002004		dissolvable' iron - could include colloidal also	profiles after dust storm
3	23-31, 1	2001	-155.894	23.3578	0		0.962319	NEPac		Johnson, K.S., Elrod, V., Fitzwater, S., Plant, J.N., Chavez, F.P., Tanner, S.J., Gordon, M., Westphal, D.L., Perry, K.D., Wu, J., and Karl, D.M., 2003. Surface ocean-lower atmosphere interactions in the Northeast Pacific Ocean Gyre: Aerosols, iron, and the ecosystem response, GBC(17), 10.1029/2002GB002004		dissolvable' iron - could include colloidal also	profiles after dust storm
3	13-27	2001	-130.687	33.094	0		0.232441	NEPac		Johnson, K.S., Elrod, V., Fitzwater, S., Plant, J.N., Chavez, F.P., Tanner, S.J., Gordon, M., Westphal, D.L., Perry, K.D., Wu, J., and Karl, D.M., 2003. Surface ocean-lower atmosphere interactions in the Northeast Pacific Ocean Gyre: Aerosols, iron, and the ecosystem response, GBC(17), 10.1029/2002GB002004		dissolvable' iron - could include colloidal also	profiles after dust storm
3	13-27	2001	-129.883	33.4402	0		0.226489	NEPac		Johnson, K.S., Elrod, V., Fitzwater, S., Plant, J.N., Chavez, F.P., Tanner, S.J., Gordon, M., Westphal, D.L., Perry, K.D., Wu, J., and Karl, D.M., 2003. Surface ocean-lower atmosphere interactions in the Northeast Pacific Ocean Gyre: Aerosols, iron, and the ecosystem response, GBC(17), 10.1029/2002GB002004		dissolvable' iron - could include colloidal also	profiles after dust storm
3	13-27	2001	-149.823	25.747	0		0.168714	NEPac		Johnson, K.S., Elrod, V., Fitzwater, S., Plant, J.N., Chavez, F.P., Tanner, S.J., Gordon, M., Westphal, D.L., Perry, K.D., Wu, J., and Karl, D.M., 2003. Surface ocean-lower atmosphere interactions in the Northeast Pacific Ocean Gyre: Aerosols, iron, and the ecosystem response, GBC(17), 10.1029/2002GB002004		dissolvable' iron - could include colloidal also	profiles after dust storm
3	13-27	2001	-132.813	32.2938	0		0.124602	NEPac		Johnson, K.S., Elrod, V., Fitzwater, S., Plant, J.N., Chavez, F.P., Tanner, S.J., Gordon, M., Westphal, D.L., Perry, K.D., Wu, J., and Karl, D.M., 2003. Surface ocean-lower atmosphere interactions in the Northeast Pacific Ocean Gyre: Aerosols, iron, and the ecosystem response, GBC(17), 10.1029/2002GB002004		dissolvable' iron - could include colloidal also	profiles after dust storm
3	13-27	2001	-141.24	28.9735	0		0.140612	NEPac		Johnson, K.S., Elrod, V., Fitzwater, S., Plant, J.N., Chavez, F.P., Tanner, S.J., Gordon, M., Westphal, D.L., Perry, K.D., Wu, J., and Karl, D.M., 2003. Surface ocean-lower atmosphere interactions in the Northeast Pacific Ocean Gyre: Aerosols, iron, and the ecosystem response, GBC(17), 10.1029/2002GB002004		dissolvable' iron - could include colloidal also	profiles after dust storm
3	23-31, 1	2001	-142.502	28.5305	0		0.152702	NEPac		Johnson, K.S., Elrod, V., Fitzwater, S., Plant, J.N., Chavez, F.P., Tanner, S.J., Gordon, M., Westphal, D.L., Perry, K.D., Wu, J., and Karl, D.M., 2003. Surface ocean-lower atmosphere interactions in the Northeast Pacific Ocean Gyre: Aerosols, iron, and the ecosystem response, GBC(17), 10.1029/2002GB002004		dissolvable' iron - could include colloidal also	profiles after dust storm
3	13-27	2001	-131.222	32.8954	0		0.126918	NEPac		Johnson, K.S., Elrod, V., Fitzwater, S., Plant, J.N., Chavez, F.P., Tanner, S.J., Gordon, M., Westphal, D.L., Perry, K.D., Wu, J., and Karl, D.M., 2003. Surface ocean-lower atmosphere interactions in the Northeast Pacific Ocean Gyre: Aerosols, iron, and the ecosystem response, GBC(17), 10.1029/2002GB002004		dissolvable' iron - could include colloidal also	profiles after dust storm
3	23-31, 1	2001	-157.498	22.6694	0		0.469718	NEPac		Johnson, K.S., Elrod, V., Fitzwater, S., Plant, J.N., Chavez, F.P., Tanner, S.J., Gordon, M., Westphal, D.L., Perry, K.D., Wu, J., and Karl, D.M., 2003. Surface ocean-lower atmosphere interactions in the Northeast Pacific Ocean Gyre: Aerosols, iron, and the ecosystem response, GBC(17), 10.1029/2002GB002004		dissolvable' iron - could include colloidal also	profiles after dust storm
3	13-27	2001	-139.134	29.8187	0		0.167962	NEPac		Johnson, K.S., Elrod, V., Fitzwater, S., Plant, J.N., Chavez, F.P., Tanner, S.J., Gordon, M., Westphal, D.L., Perry, K.D., Wu, J., and Karl, D.M., 2003. Surface ocean-lower atmosphere interactions in the Northeast Pacific Ocean Gyre: Aerosols, iron, and the ecosystem response, GBC(17), 10.1029/2002GB002004		dissolvable' iron - could include colloidal also	profiles after dust storm
3	23-31, 1	2001	-144.97	27.98	0		0.184334	NEPac		Johnson, K.S., Elrod, V., Fitzwater, S., Plant, J.N., Chavez, F.P., Tanner, S.J., Gordon, M., Westphal, D.L., Perry, K.D., Wu, J., and Karl, D.M., 2003. Surface ocean-lower atmosphere interactions in the Northeast Pacific Ocean Gyre: Aerosols, iron, and the ecosystem response, GBC(17), 10.1029/2002GB002004		dissolvable' iron - could include colloidal also	profiles after dust storm
3	23-31, 1	2001	-131.794	32.7654	0		0.122694	NEPac		Johnson, K.S., Elrod, V., Fitzwater, S., Plant, J.N., Chavez, F.P., Tanner, S.J., Gordon, M., Westphal, D.L., Perry, K.D., Wu, J., and Karl, D.M., 2003. Surface ocean-lower atmosphere interactions in the Northeast Pacific Ocean Gyre: Aerosols, iron, and the ecosystem response, GBC(17), 10.1029/2002GB002004		dissolvable' iron - could include colloidal also	profiles after dust storm
3	23-31, 1	2001	-145.483	27.3811	0		0.338122	NEPac		Johnson, K.S., Elrod, V., Fitzwater, S., Plant, J.N., Chavez, F.P., Tanner, S.J., Gordon, M., Westphal, D.L., Perry, K.D., Wu, J., and Karl, D.M., 2003. Surface ocean-lower atmosphere interactions in the Northeast Pacific Ocean Gyre: Aerosols, iron, and the ecosystem response, GBC(17), 10.1029/2002GB002004		dissolvable' iron - could include colloidal also	profiles after dust storm
3	13-27	2001	-148.578	26.1947	0		0.1862	NEPac		Johnson, K.S., Elrod, V., Fitzwater, S., Plant, J.N., Chavez, F.P., Tanner, S.J., Gordon, M., Westphal, D.L., Perry, K.D., Wu, J., and Karl, D.M., 2003. Surface ocean-lower atmosphere interactions in the Northeast Pacific Ocean Gyre: Aerosols, iron, and the ecosystem response, GBC(17), 10.1029/2002GB002004		dissolvable' iron - could include colloidal also	profiles after dust storm
3	13-27	2001	-155.98	23.323	0		0.192831	NEPac		Johnson, K.S., Elrod, V., Fitzwater, S., Plant, J.N., Chavez, F.P., Tanner, S.J., Gordon, M., Westphal, D.L., Perry, K.D., Wu, J., and Karl, D.M., 2003. Surface ocean-lower atmosphere interactions in the Northeast Pacific Ocean Gyre: Aerosols, iron, and the ecosystem response, GBC(17), 10.1029/2002GB002004		dissolvable' iron - could include colloidal also	profiles after dust storm
3	23-31, 1	2001	-158.252	21.812	0		0.528097	NEPac		Johnson, K.S., Elrod, V., Fitzwater, S., Plant, J.N., Chavez, F.P., Tanner, S.J., Gordon, M., Westphal, D.L., Perry, K.D., Wu, J., and Karl, D.M., 2003. Surface ocean-lower atmosphere interactions in the Northeast Pacific Ocean Gyre: Aerosols, iron, and the ecosystem response, GBC(17), 10.1029/2002GB002004		dissolvable' iron - could include colloidal also	profiles after dust storm
3	13-27	2001	-150.744	25.4052	0		0.194505	NEPac		Johnson, K.S., Elrod, V., Fitzwater, S., Plant, J.N., Chavez, F.P., Tanner, S.J., Gordon, M., Westphal, D.L., Perry, K.D., Wu, J., and Karl, D.M., 2003. Surface ocean-lower atmosphere interactions in the Northeast Pacific Ocean Gyre: Aerosols, iron, and the ecosystem response, GBC(17), 10.1029/2002GB002004		dissolvable' iron - could include colloidal also	profiles after dust storm
3	13-27	2001	-144.791	27.7482	0		0.203814	NEPac		Johnson, K.S., Elrod, V., Fitzwater, S., Plant, J.N., Chavez, F.P., Tanner, S.J., Gordon, M., Westphal, D.L., Perry, K.D., Wu, J., and Karl, D.M., 2003. Surface ocean-lower atmosphere interactions in the Northeast Pacific Ocean Gyre: Aerosols, iron, and the ecosystem response, GBC(17), 10.1029/2002GB002004		dissolvable' iron - could include colloidal also	profiles after dust storm
3	13-27	2001	-138.018	30.2598	0		0.134246	NEPac		Johnson, K.S., Elrod, V., Fitzwater, S., Plant, J.N., Chavez, F.P., Tanner, S.J., Gordon, M., Westphal, D.L., Perry, K.D., Wu, J., and Karl, D.M., 2003. Surface ocean-lower atmosphere interactions in the Northeast Pacific Ocean Gyre: Aerosols, iron, and the ecosystem response, GBC(17), 10.1029/2002GB002004		dissolvable' iron - could include colloidal also	profiles after dust storm
3	23-31, 1	2001	-122.57	36.52	0		0.14756	NEPac		Johnson, K.S., Elrod, V., Fitzwater, S., Plant, J.N., Chavez, F.P., Tanner, S.J., Gordon, M., Westphal, D.L., Perry, K.D., Wu, J., and Karl, D.M., 2003. Surface ocean-lower atmosphere interactions in the Northeast Pacific Ocean Gyre: Aerosols, iron, and the ecosystem response, GBC(17), 10.1029/2002GB002004		dissolvable' iron - could include colloidal also	profiles after dust storm
3	13-27	2001	-143.349	28.2375	0		0.0815929	NEPac		Johnson, K.S., Elrod, V., Fitzwater, S., Plant, J.N., Chavez, F.P., Tanner, S.J., Gordon, M., Westphal, D.L., Perry, K.D., Wu, J., and Karl, D.M., 2003. Surface ocean-lower atmosphere interactions in the Northeast Pacific Ocean Gyre: Aerosols, iron, and the ecosystem response, GBC(17), 10.1029/2002GB002004		dissolvable' iron - could include colloidal also	profiles after dust storm
3	13-27	2001	-128.121	34.1907	0		0.613258	NEPac		Johnson, K.S., Elrod, V., Fitzwater, S., Plant, J.N., Chavez, F.P., Tanner, S.J., Gordon, M., Westphal, D.L., Perry, K.D., Wu, J., and Karl, D.M., 2003. Surface ocean-lower atmosphere interactions in the Northeast Pacific Ocean Gyre: Aerosols, iron, and the ecosystem response, GBC(17), 10.1029/2002GB002004		dissolvable' iron - could include colloidal also	profiles after dust storm
3	13-27	2001	-156.034	23.3012	0		0.175535	NEPac		Johnson, K.S., Elrod, V., Fitzwater, S., Plant, J.N., Chavez, F.P., Tanner, S.J., Gordon, M., Westphal, D.L., Perry, K.D., Wu, J., and Karl, D.M., 2003. Surface ocean-lower atmosphere interactions in the Northeast Pacific Ocean Gyre: Aerosols, iron, and the ecosystem response, GBC(17), 10.1029/2002GB002004		dissolvable' iron - could include colloidal also	profiles after dust storm
3	13-27	2001	-131.908	32.6302	0		0.150082	NEPac		Johnson, K.S., Elrod, V., Fitzwater, S., Plant, J.N., Chavez, F.P., Tanner, S.J., Gordon, M., Westphal, D.L., Perry, K.D., Wu, J., and Karl, D.M., 2003. Surface ocean-lower atmosphere interactions in the Northeast Pacific Ocean Gyre: Aerosols, iron, and the ecosystem response, GBC(17), 10.1029/2002GB002004		dissolvable' iron - could include colloidal also	profiles after dust storm
3	13-27	2001	-143.213	28.2852	0		0.105989	NEPac		Johnson, K.S., Elrod, V., Fitzwater, S., Plant, J.N., Chavez, F.P., Tanner, S.J., Gordon, M., Westphal, D.L., Perry, K.D., Wu, J., and Karl, D.M., 2003. Surface ocean-lower atmosphere interactions in the Northeast Pacific Ocean Gyre: Aerosols, iron, and the ecosystem response, GBC(17), 10.1029/2002GB002004		dissolvable' iron - could include colloidal also	profiles after dust storm
3	13-27	2001	-130.241	33.2841	0		0.118958	NEPac		Johnson, K.S., Elrod, V., Fitzwater, S., Plant, J.N., Chavez, F.P., Tanner, S.J., Gordon, M., Westphal, D.L., Perry, K.D., Wu, J., and Karl, D.M., 2003. Surface ocean-lower atmosphere interactions in the Northeast Pacific Ocean Gyre: Aerosols, iron, and the ecosystem response, GBC(17), 10.1029/2002GB002004		dissolvable' iron - could include colloidal also	profiles after dust storm
3	13-27	2001	-155.537	23.5063	0		0.192377	NEPac		Johnson, K.S., Elrod, V., Fitzwater, S., Plant, J.N., Chavez, F.P., Tanner, S.J., Gordon, M., Westphal, D.L., Perry, K.D., Wu, J., and Karl, D.M., 2003. Surface ocean-lower atmosphere interactions in the Northeast Pacific Ocean Gyre: Aerosols, iron, and the ecosystem response, GBC(17), 10.1029/2002GB002004		dissolvable' iron - could include colloidal also	profiles after dust storm
3	23-31, 1	2001	-147.207	26.7226	0		0.27776	NEPac		Johnson, K.S., Elrod, V., Fitzwater, S., Plant, J.N., Chavez, F.P., Tanner, S.J., Gordon, M., Westphal, D.L., Perry, K.D., Wu, J., and Karl, D.M., 2003. Surface ocean-lower atmosphere interactions in the Northeast Pacific Ocean Gyre: Aerosols, iron, and the ecosystem response, GBC(17), 10.1029/2002GB002004		dissolvable' iron - could include colloidal also	profiles after dust storm
3	13-27	2001	-125.823	35.0742	0		0.490207	NEPac		Johnson, K.S., Elrod, V., Fitzwater, S., Plant, J.N., Chavez, F.P., Tanner, S.J., Gordon, M., Westphal, D.L., Perry, K.D., Wu, J., and Karl, D.M., 2003. Surface ocean-lower atmosphere interactions in the Northeast Pacific Ocean Gyre: Aerosols, iron, and the ecosystem response, GBC(17), 10.1029/2002GB002004		dissolvable' iron - could include colloidal also	profiles after dust storm
3	23-31, 1	2001	-128.83	33.9105	0		0.103743	NEPac		Johnson, K.S., Elrod, V., Fitzwater, S., Plant, J.N., Chavez, F.P., Tanner, S.J., Gordon, M., Westphal, D.L., Perry, K.D., Wu, J., and Karl, D.M., 2003. Surface ocean-lower atmosphere interactions in the Northeast Pacific Ocean Gyre: Aerosols, iron, and the ecosystem response, GBC(17), 10.1029/2002GB002004		dissolvable' iron - could include colloidal also	profiles after dust storm
3	13-27	2001	-132.153	32.5456	0		0.193189	NEPac		Johnson, K.S., Elrod, V., Fitzwater, S., Plant, J.N., Chavez, F.P., Tanner, S.J., Gordon, M., Westphal, D.L., Perry, K.D., Wu, J., and Karl, D.M., 2003. Surface ocean-lower atmosphere interactions in the Northeast Pacific Ocean Gyre: Aerosols, iron, and the ecosystem response, GBC(17), 10.1029/2002GB002004		dissolvable' iron - could include colloidal also	profiles after dust storm
3	23-31, 1	2001	-128.31	34.1097	0		0.119448	NEPac		Johnson, K.S., Elrod, V., Fitzwater, S., Plant, J.N., Chavez, F.P., Tanner, S.J., Gordon, M., Westphal, D.L., Perry, K.D., Wu, J., and Karl, D.M., 2003. Surface ocean-lower atmosphere interactions in the Northeast Pacific Ocean Gyre: Aerosols, iron, and the ecosystem response, GBC(17), 10.1029/2002GB002004		dissolvable' iron - could include colloidal also	profiles after dust storm
3	13-27	2001	-129.364	33.6649	0		0.283896	NEPac		Johnson, K.S., Elrod, V., Fitzwater, S., Plant, J.N., Chavez, F.P., Tanner, S.J., Gordon, M., Westphal, D.L., Perry, K.D., Wu, J., and Karl, D.M., 2003. Surface ocean-lower atmosphere interactions in the Northeast Pacific Ocean Gyre: Aerosols, iron, and the ecosystem response, GBC(17), 10.1029/2002GB002004		dissolvable' iron - could include colloidal also	profiles after dust storm
[truncated: 4,796 more rows]
